# Supplementary material
Source: MDPI journal article supplement (https://www.mdpi.com/2075-163X/11/7/763)
Supplement: s1 [file s1]

Supplementary Material S1: SEM-BSE images and Electron Dispersive Spectroscopy (EDS) mineral analyses for sample AX1B.

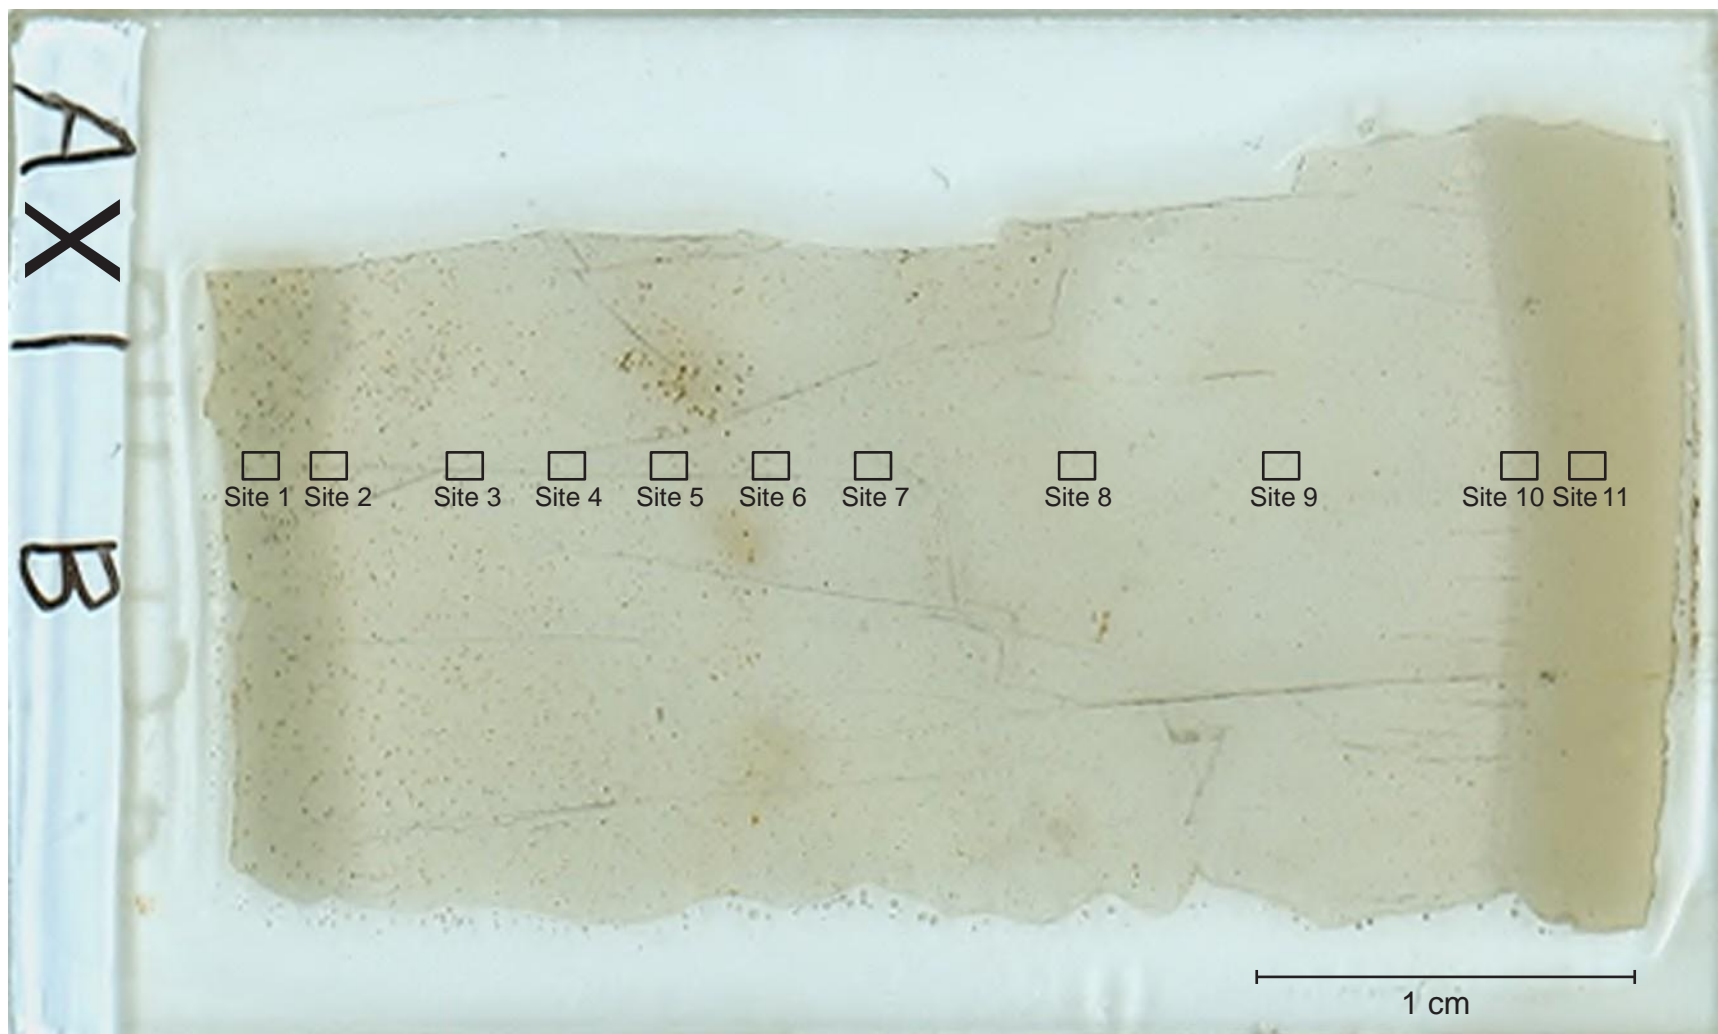

Figure S1.1: AX1B thin section showing respective sites taken for mineral chemical analyses (EDS) via Scanning Electron Microscope (SEM).

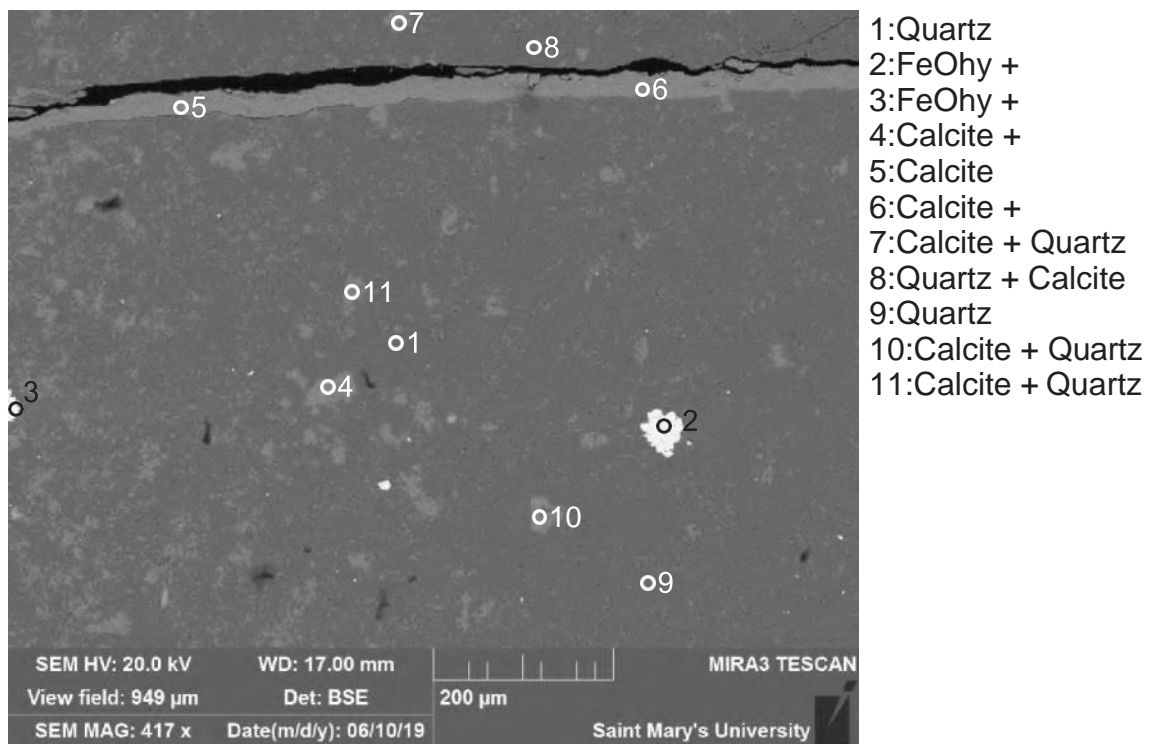

Figure S1.2: AX1B (SEM) Site 1 (Table S1.1). Blebs of goethite (2,3) in a mixture of quartz and calcite (1,4,7-11). Calcite vein (5,6) cutting the quartz.

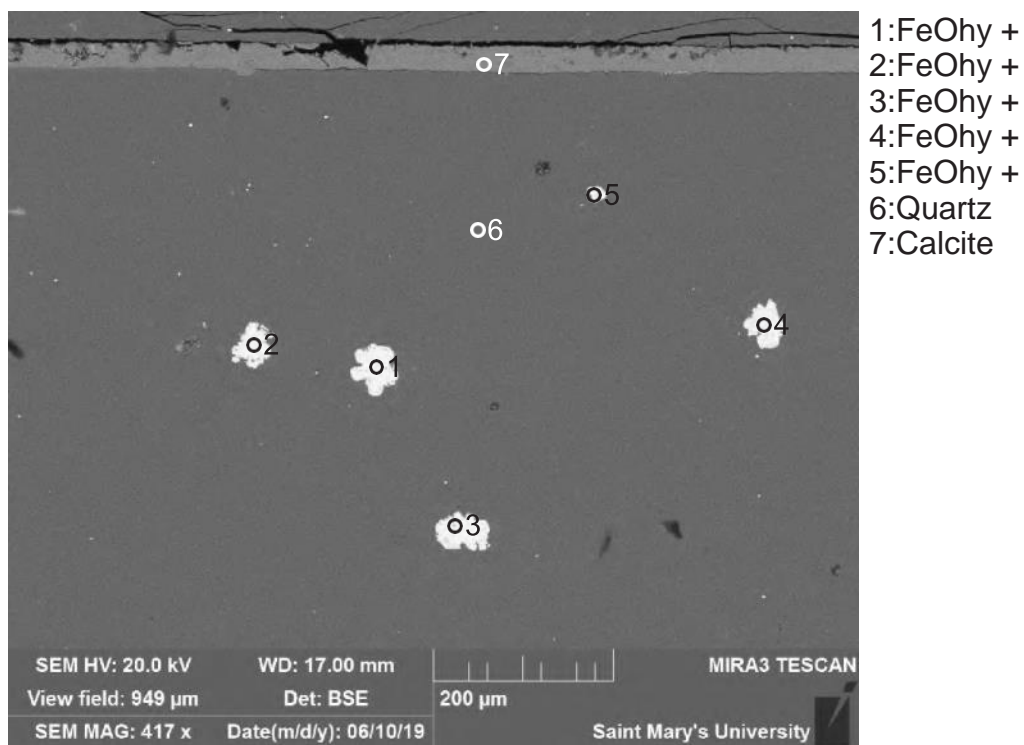

Figure S1.3: AX1B (SEM) Site 2 (Table S1.1). Blebs of goethite (1-5) scattered across the quartz (6). A calcite vein (7) cuts across the quartz.

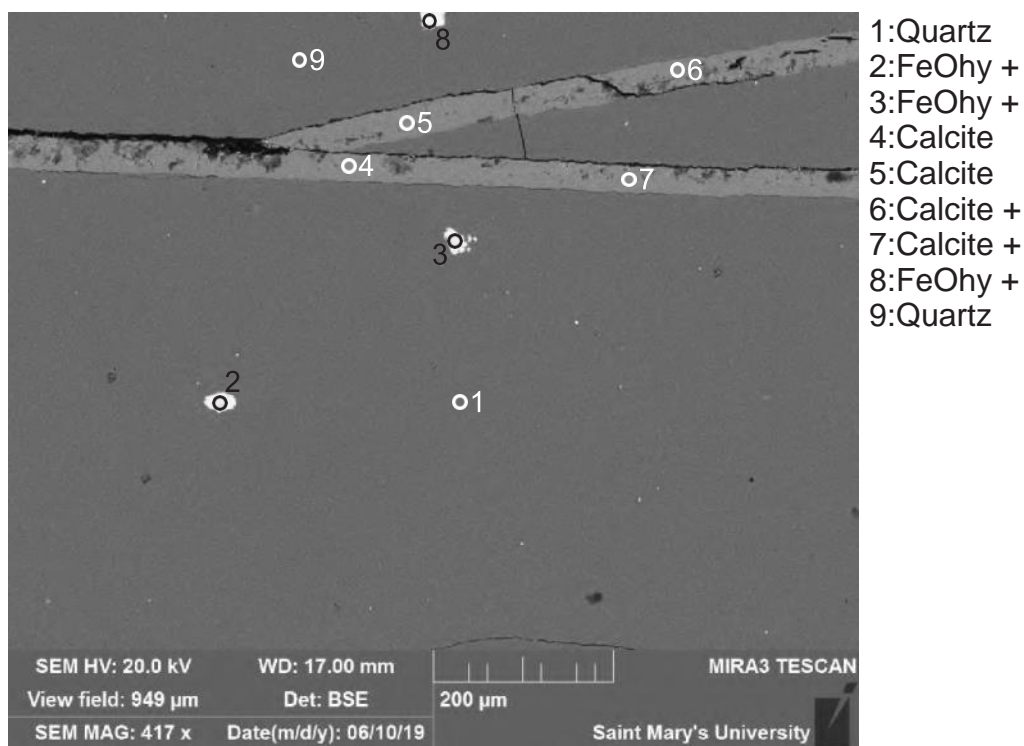

Figure S1.4: AX1B (SEM) Site 3 (Table S1.1). Two calcite veins (4-7) cutting quartz. Scattered goethite blebs (2,3,8).

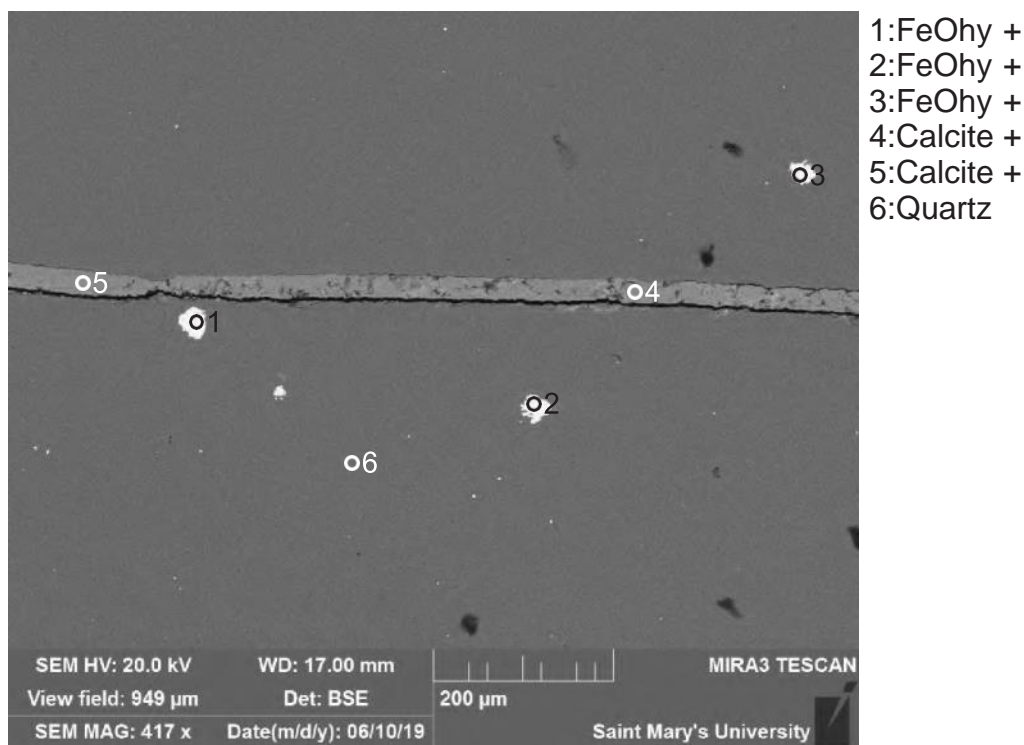

Figure S1.5: AX1B (SEM) Site 4 (Table S1.1). Similar to Fig.S1.3.



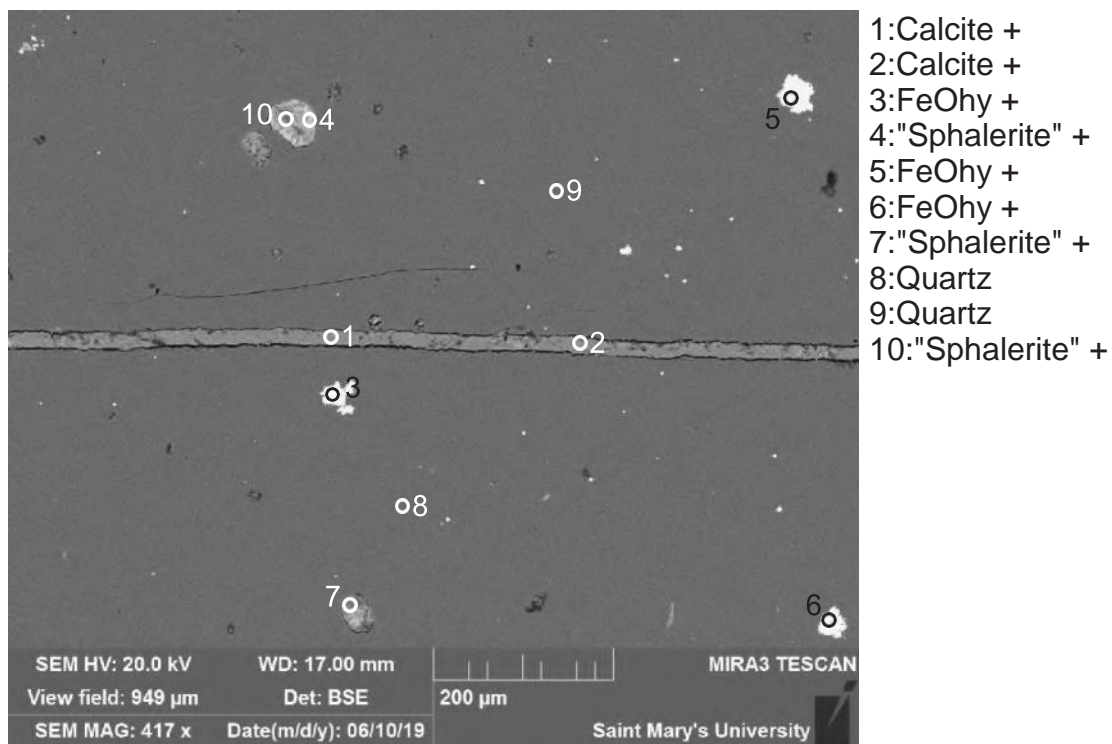

Figure S1.6: AX1B (SEM) Site 5 (Table S1.1). Scattered blebs of goethite (3,5,6) in quartz (8,9). Calcite vein cuts quartz (1,2). "Sphalerite", clay and probably calcite (4,7,10) seem to fill in voids in the quartz.

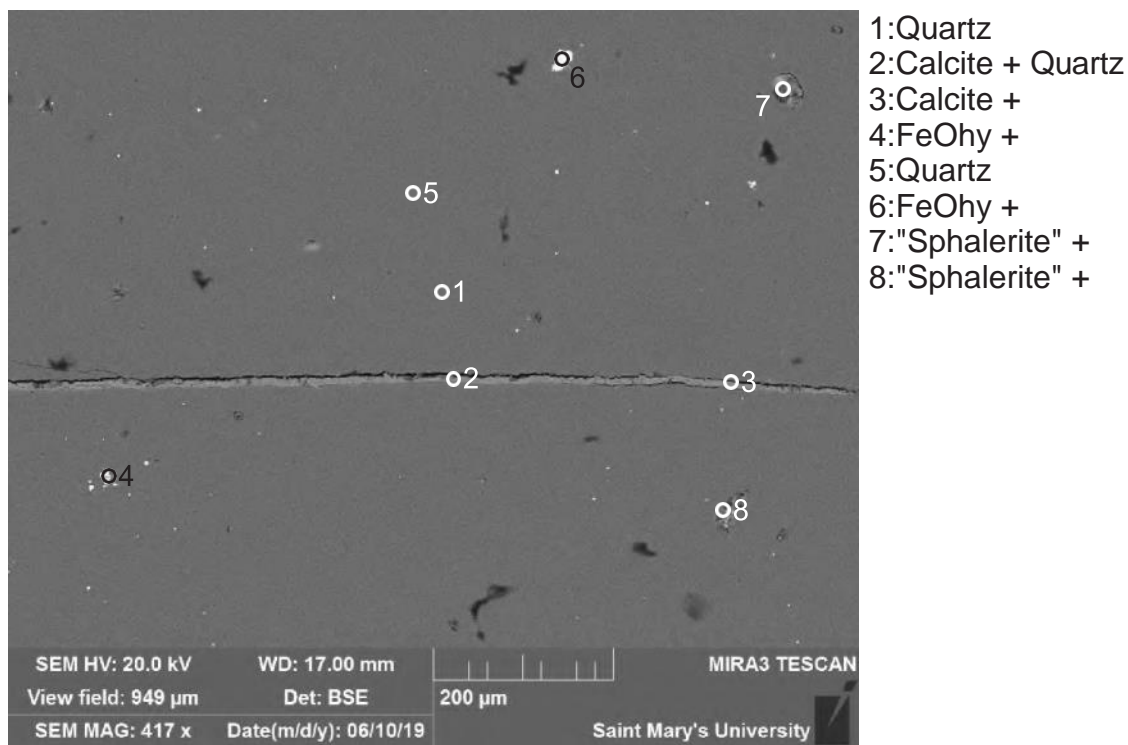

Figure S1.7: AX1B (SEM) Site 6 (Table S1.1). Similar to Fig.S1.6.

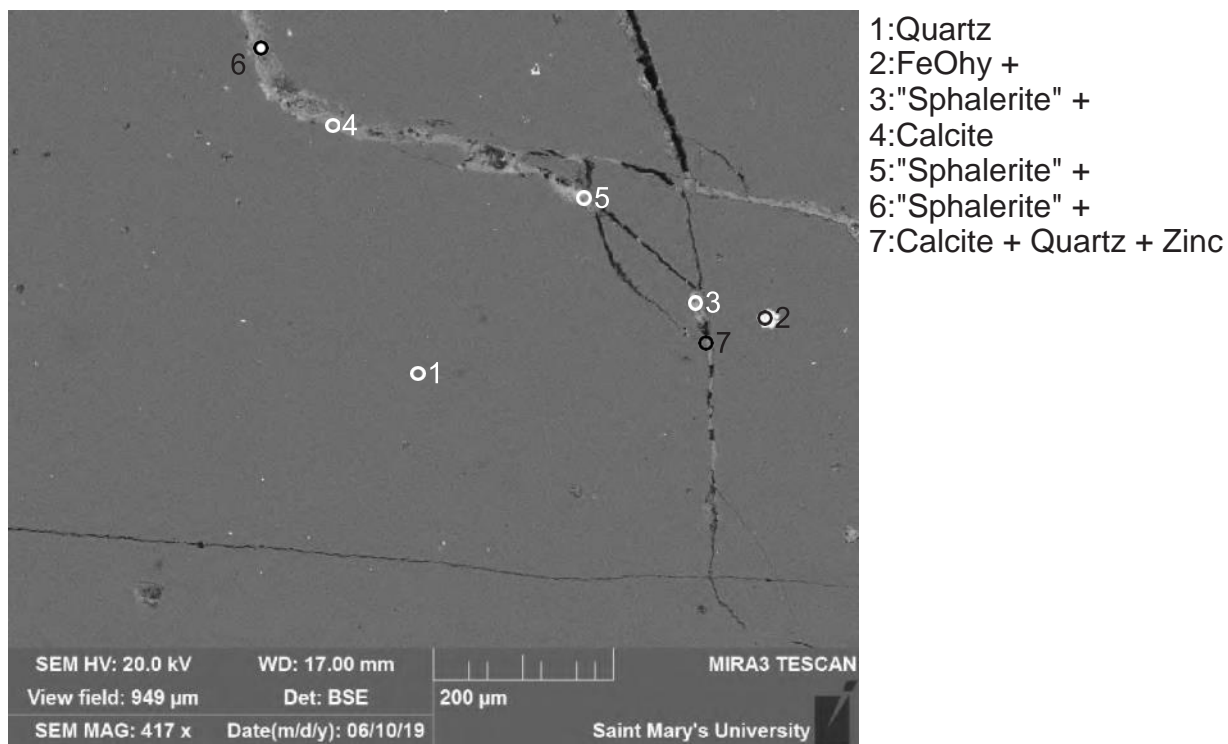

Figure S1.8: AX1B (SEM) Site 7 (Table S1.1). Fractures in quartz (1). Some fractures are filled by a mixture of "sphalerite" (3,5,6) and calcite (4,7). Position 7 shows a higher Zinc content (up to 4.11%).

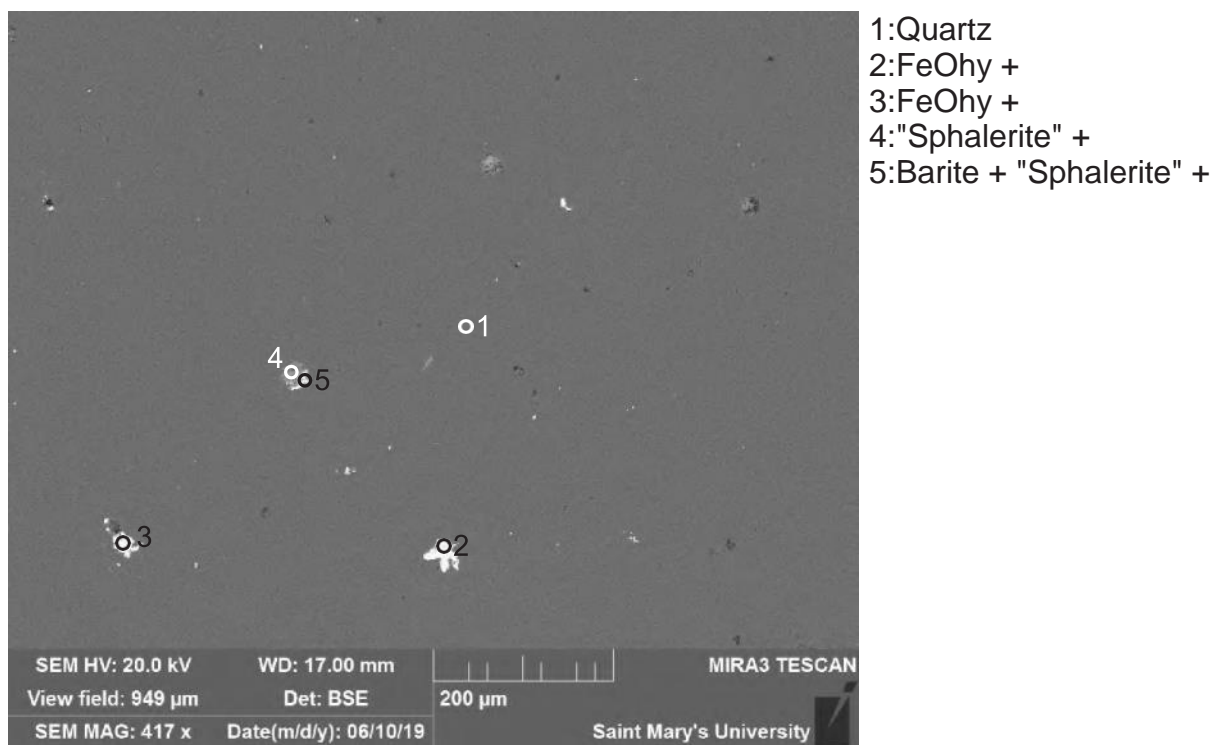

Figure S1.9: AX1B (SEM) Site 8 (Table S1.1). Scattered blebs of goethite (2,3), "sphalerite" (4,5) and barite (5).

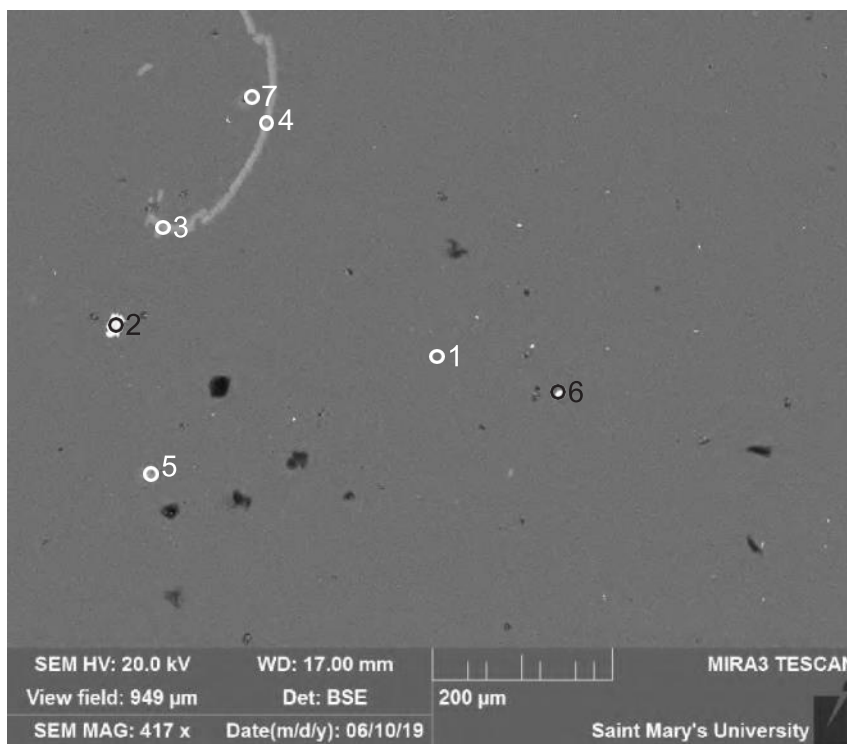

- 1:Quartz
- 2:FeOhy +
- 3:Apatite + Quartz
- 4:Apatite + Quartz
- 5:"Sphalerite" +
- 6:FeOhy +
- 7:Apatite + Quartz

Figure S1.10: AX1B (SEM) Site 9 (Table S1.1). Most likely a fossil replaced by apatite (3,4). Scattered blebs of goethite (2,6). Some porosity with some of the voids filled by "sphalerite" (5).

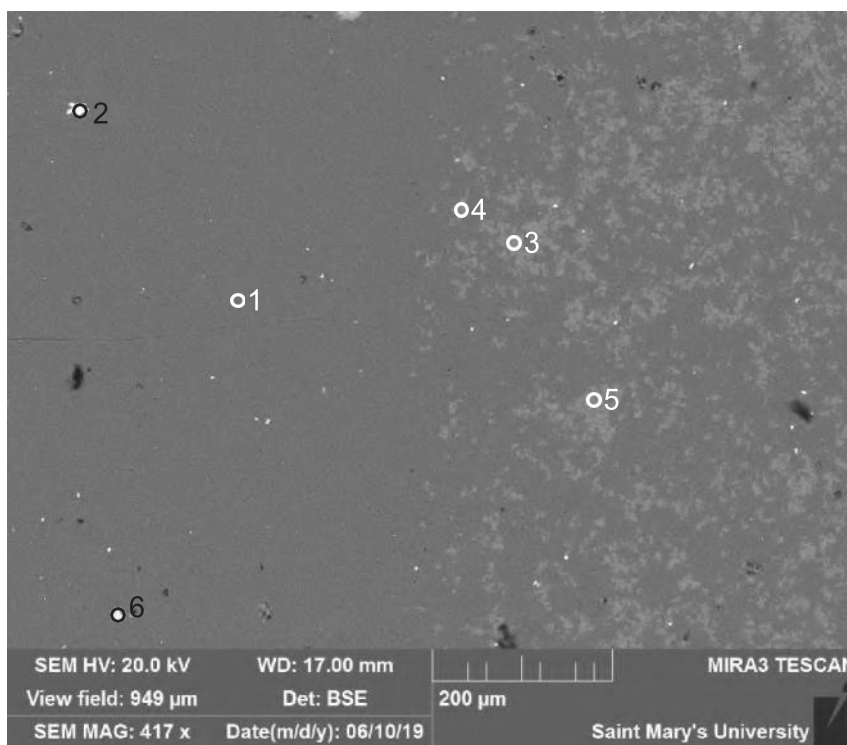

- 1:Quartz
- 2:FeOhy +
- 3:Calcite + Quartz
- 4:Calcite + Quartz
- 5:Calcite + Quartz
- 6:FeOhy +

Figure S1.11: AX1B (SEM) Site 10 (Table S1.1). FeOhy blebs (2,6) in quartz (1). Transition into more patches of calcite in the quartz (3-5).

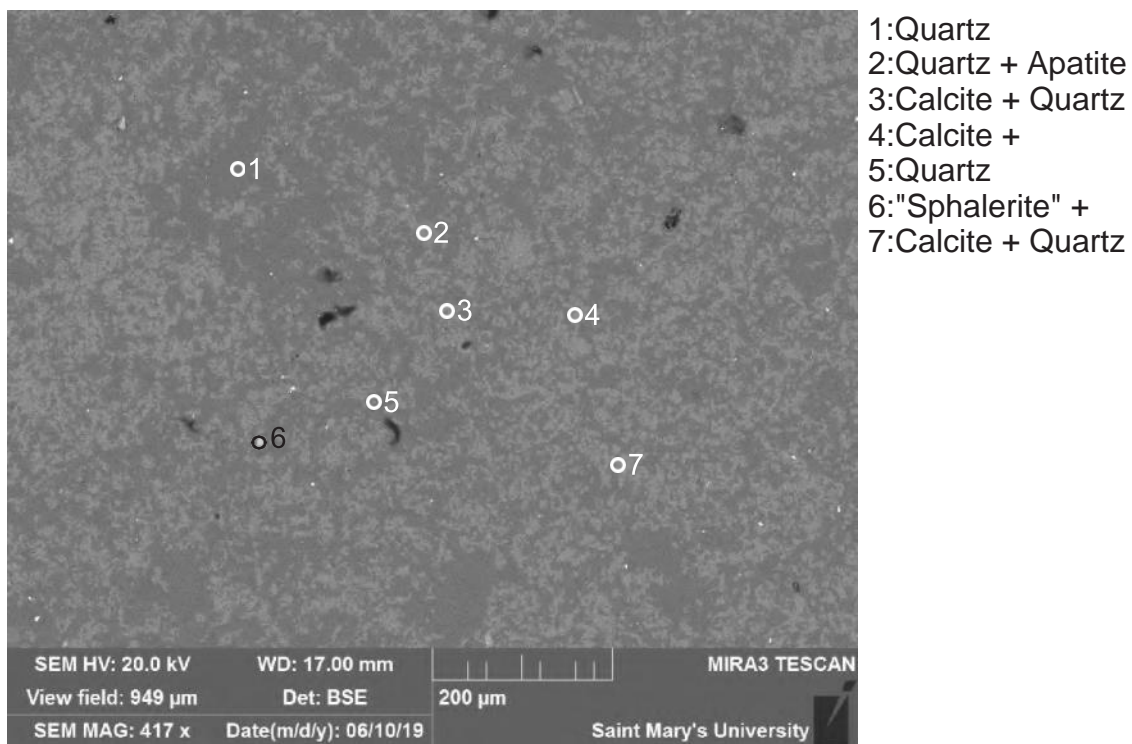

Figure S1.12: AX1B (SEM) Site 11 (Table S1.1). Mixture of calcite and quartz (3,7) with some blebs of apatite (2) and "sphalerite" (6).

Table S1.1: Scanning Electron Microscope (SEM) mineral chemical analyses (EDS) of AX1B.

| Sample | Site | Position | Mineral  | SiO2   | Al2O3 | FeO   | MnO  | MgO  | CaO   | Na2O | K2O  | P2O5 | SO3   | F | Cl   | NiO  | CuO  | ZnO   | As2O3 | BaO  | Total | Total |
|--------|------|----------|----------|--------|-------|-------|------|------|-------|------|------|------|-------|---|------|------|------|-------|-------|------|-------|-------|
| AX1 B  | 1    | 1        | Qz       | 100.00 |       |       |      |      |       |      |      |      |       |   |      |      |      |       |       |      | 100   | 111   |
| AX1 B  | 1    | 2        | FeOhy +  | 5.87   |       | 92.70 | 0.88 |      | 0.56  |      |      |      |       |   |      |      |      |       |       |      | 100   | 75    |
| AX1 B  | 1    | 3        | FeOhy +  | 6.88   |       | 91.61 | 0.80 |      | 0.70  |      |      |      |       |   |      |      |      |       |       |      | 100   | 70    |
| AX1 B  | 1    | 4        | Cal +    | 2.16   |       |       |      |      | 97.84 |      |      |      |       |   |      |      |      |       |       |      | 100   | 52    |
| AX1 B  | 1    | 5        | Cal      | 0.76   |       |       |      |      | 54.97 |      |      |      |       |   |      |      |      | 0.27  |       |      | 56    | 50    |
| AX1 B  | 1    | 6        | Cal +    | 2.42   |       |       |      | 0.69 | 96.89 |      |      |      |       |   |      |      |      |       |       |      | 100   | 52    |
| AX1 B  | 1    | 7        | Cal + Qz | 12.58  |       |       |      | 0.68 | 86.29 |      |      |      |       |   |      |      |      | 0.45  |       |      | 100   | 56    |
| AX1 B  | 1    | 8        | Qz + Cal | 76.46  |       |       |      |      | 23.54 |      |      |      |       |   |      |      |      |       |       |      | 100   | 85    |
| AX1 B  | 1    | 9        | Qz       | 100.00 |       |       |      |      |       |      |      |      |       |   |      |      |      |       |       |      | 100   | 115   |
| AX1 B  | 1    | 10       | Cal + Qz | 11.96  |       |       |      |      | 87.81 |      |      |      |       |   |      |      |      | 0.24  |       |      | 100   | 59    |
| AX1 B  | 1    | 11       | Cal + Qz | 18.19  |       |       |      | 0.65 | 81.15 |      |      |      |       |   |      |      |      |       |       |      | 100   | 58    |
| AX1 B  | 2    | 1        | FeOhy +  | 8.96   |       | 89.69 |      |      | 0.66  |      |      |      |       |   |      | 0.69 |      |       |       |      | 100   | 72    |
| AX1 B  | 2    | 2        | FeOhy +  | 9.44   |       | 90.02 |      |      | 0.54  |      |      |      |       |   |      |      |      |       |       |      | 100   | 70    |
| AX1 B  | 2    | 3        | FeOhy +  | 8.95   |       | 90.47 |      |      | 0.58  |      |      |      |       |   |      |      |      |       |       |      | 100   | 74    |
| AX1 B  | 2    | 4        | FeOhy +  | 9.45   |       | 89.99 |      |      | 0.56  |      |      |      |       |   |      |      |      |       |       |      | 100   | 74    |
| AX1 B  | 2    | 5        | FeOhy +  | 8.16   |       | 91.36 |      |      | 0.48  |      |      |      |       |   |      |      |      |       |       |      | 100   | 74    |
| AX1 B  | 2    | 6        | Qz       | 100.00 |       |       |      |      |       |      |      |      |       |   |      |      |      |       |       |      | 100   | 111   |
| AX1 B  | 2    | 7        | Cal      | 0.91   |       |       |      |      | 55.09 |      |      |      |       |   |      |      |      |       |       |      | 56    | 51    |
| AX1 B  | 3    | 1        | Qz       | 100.00 |       |       |      |      |       |      |      |      |       |   |      |      |      |       |       |      | 100   | 114   |
| AX1 B  | 3    | 2        | FeOhy +  | 10.26  |       | 86.58 | 1.31 |      | 0.68  |      |      |      |       |   | 0.32 |      | 0.84 |       |       |      | 100   | 72    |
| AX1 B  | 3    | 3        | FeOhy +  | 8.76   |       | 90.75 |      |      | 0.48  |      |      |      |       |   |      |      |      |       |       |      | 100   | 72    |
| AX1 B  | 3    | 4        | Cal      | 0.71   |       |       |      |      | 55.29 |      |      |      |       |   |      |      |      |       |       |      | 56    | 52    |
| AX1 B  | 3    | 5        | Cal      | 1.09   |       |       |      | 0.44 | 54.47 |      |      |      |       |   |      |      |      |       |       |      | 56    | 52    |
| AX1 B  | 3    | 6        | Cal +    | 7.46   |       |       |      |      | 92.01 |      |      |      |       |   |      |      |      | 0.53  |       |      | 100   | 55    |
| AX1 B  | 3    | 7        | Cal +    | 2.09   |       |       |      |      | 97.91 |      |      |      |       |   |      |      |      |       |       |      | 100   | 54    |
| AX1 B  | 3    | 8        | FeOhy +  | 8.40   |       | 89.77 | 1.14 |      | 0.70  |      |      |      |       |   |      |      |      |       |       |      | 100   | 70    |
| AX1 B  | 3    | 9        | Qz       | 100.00 |       |       |      |      |       |      |      |      |       |   |      |      |      |       |       |      | 100   | 109   |
| AX1 B  | 4    | 1        | FeOhy +  | 8.99   |       | 87.47 | 0.95 |      | 0.88  |      |      |      | 0.98  |   |      |      |      | 0.73  |       |      | 100   | 72    |
| AX1 B  | 4    | 2        | FeOhy +  | 5.87   |       | 91.98 | 1.60 |      | 0.55  |      |      |      |       |   |      |      |      |       |       |      | 100   | 74    |
| AX1 B  | 4    | 3        | FeOhy +  | 6.44   |       | 91.79 | 0.91 |      | 0.52  |      |      |      |       |   | 0.33 |      |      |       |       |      | 100   | 75    |
| AX1 B  | 4    | 4        | Cal +    | 2.36   |       |       |      |      | 97.64 |      |      |      |       |   |      |      |      |       |       |      | 100   | 55    |
| AX1 B  | 4    | 5        | Cal +    | 2.95   |       |       |      |      | 97.05 |      |      |      |       |   |      |      |      |       |       |      | 100   | 53    |
| AX1 B  | 4    | 6        | Qz       | 100.00 |       |       |      |      |       |      |      |      |       |   |      |      |      |       |       |      | 100   | 114   |
| AX1 B  | 5    | 1        | Cal +    | 7.59   |       |       |      |      | 91.95 |      |      |      |       |   |      |      |      | 0.46  |       |      | 100   | 57    |
| AX1 B  | 5    | 2        | Cal +    | 4.06   |       | 0.62  |      | 1.13 | 90.25 |      |      |      | 1.97  |   |      |      |      | 1.97  |       |      | 100   | 58    |
| AX1 B  | 5    | 3        | FeOhy +  | 7.70   |       | 90.83 | 0.91 |      | 0.56  |      |      |      |       |   |      |      |      |       |       |      | 100   | 74    |
| AX1 B  | 5    | 4        | Sp +     | 19.01  | 1.91  | 1.26  |      | 5.28 | 7.85  |      | 0.33 |      | 35.23 |   | 0.84 |      |      | 28.72 | -0.43 |      | 100   | 86    |
| AX1 B  | 5    | 5        | FeOhy +  | 7.09   |       | 92.00 | 0.91 |      |       |      |      |      |       |   |      |      |      |       |       |      | 100   | 75    |
| AX1 B  | 5    | 6        | FeOhy +  | 9.07   |       | 86.76 |      |      | 0.58  |      |      | 1.00 |       |   |      | 0.74 | 1.17 | 0.68  |       |      | 100   | 80    |
| AX1 B  | 5    | 7        | Sp +     | 22.34  | 2.73  | 1.69  |      | 4.65 | 7.56  |      |      |      | 33.55 |   | 0.76 |      |      | 25.67 |       | 1.05 | 100   | 65    |
| AX1 B  | 5    | 8        | Qz       | 100.00 |       |       |      |      |       |      |      |      |       |   |      |      |      |       |       |      | 100   | 116   |
| AX1 B  | 5    | 9        | Qz       | 100.00 |       |       |      |      |       |      |      |      |       |   |      |      |      |       |       |      | 100   | 115   |
| AX1 B  | 5    | 10       | Sp +     | 15.72  | 1.78  | 1.22  |      | 4.38 | 8.53  |      |      |      | 36.81 |   | 0.88 |      |      | 30.63 | 0.05  |      | 100   | 58    |

Table S1.1: Scanning Electron Microscope (SEM) mineral chemical analyses (EDS) of AX1B.

| Sample | Site | Position | Mineral       | SiO2   | Al2O3 | FeO   | MnO  | MgO  | CaO   | Na2O | K2O  | P2O5  | SO3   | F    | Cl   | NiO  | CuO  | ZnO   | As2O3 | BaO   | Total | Total |
|--------|------|----------|---------------|--------|-------|-------|------|------|-------|------|------|-------|-------|------|------|------|------|-------|-------|-------|-------|-------|
| AX1 B  | 6    | 1        | Qz            | 100.00 |       |       |      |      |       |      |      |       |       |      |      |      |      |       |       |       | 100   | 116   |
| AX1 B  | 6    | 2        | Cal + Qz      | 18.85  |       |       |      |      | 79.18 |      |      |       | 0.92  |      |      |      |      | 1.05  |       |       | 100   | 65    |
| AX1 B  | 6    | 3        | Cal +         | 2.75   |       |       |      |      | 96.53 |      |      |       |       |      |      |      |      | 0.71  |       |       | 100   | 57    |
| AX1 B  | 6    | 4        | FeOhy +       | 6.61   |       | 91.60 | 1.34 |      | 0.45  |      |      |       |       |      |      |      |      |       |       |       | 100   | 72    |
| AX1 B  | 6    | 5        | Qz            | 100.00 |       |       |      |      |       |      |      |       |       |      |      |      |      |       |       |       | 100   | 114   |
| AX1 B  | 6    | 6        | FeOhy +       | 7.03   |       | 89.69 | 0.83 |      | 0.52  |      |      |       |       |      |      | 0.74 | 1.18 |       |       |       | 100   | 74    |
| AX1 B  | 6    | 7        | Sp +          | 29.53  | 4.57  | 3.61  |      | 5.48 | 10.17 |      |      |       | 24.55 |      | 0.84 |      |      | 21.25 |       |       | 100   | 42    |
| AX1 B  | 6    | 8        | Sp +          | 19.90  | 2.62  | 1.85  |      | 6.39 | 9.30  |      | 0.38 |       | 32.69 |      | 0.64 |      |      | 26.22 |       |       | 100   | 47    |
| AX1 B  | 7    | 1        | Qz            | 100.00 |       |       |      |      |       |      |      |       |       |      |      |      |      |       |       |       | 100   | 116   |
| AX1 B  | 7    | 2        | FeOhy +       | 7.21   |       | 89.45 | 1.39 |      | 0.59  |      |      |       |       |      |      |      | 1.35 |       |       |       | 100   | 78    |
| AX1 B  | 7    | 3        | Sp +          | 31.24  | 3.39  | 3.17  |      | 3.55 | 9.82  |      | 0.40 |       | 25.76 |      | 0.93 |      |      | 21.51 | 0.23  |       | 100   | 65    |
| AX1 B  | 7    | 4        | Cal           | 1.18   |       |       |      | 0.80 | 53.85 |      |      |       |       |      |      |      |      | 0.17  |       |       | 56    | 55    |
| AX1 B  | 7    | 5        | Sp +          | 35.69  | 3.41  | 3.55  |      | 3.12 | 9.94  |      | 0.37 |       | 23.95 |      | 0.49 |      |      | 19.48 |       |       | 100   | 71    |
| AX1 B  | 7    | 6        | Sp +          | 29.95  | 3.06  | 2.56  |      | 6.86 | 14.07 |      |      |       | 24.09 |      | 0.60 |      |      | 18.76 | 0.05  |       | 100   | 56    |
| AX1 B  | 7    | 7        | Cal + Qz + Zn | 38.29  |       |       |      | 0.55 | 52.82 |      |      |       | 4.23  |      |      |      |      | 4.11  |       |       | 100   | 75    |
| AX1 B  | 8    | 1        | Qz            | 100.00 |       |       |      |      |       |      |      |       |       |      |      |      |      |       |       |       | 100   | 119   |
| AX1 B  | 8    | 2        | FeOhy +       | 9.01   |       | 88.64 |      |      | 0.58  |      |      |       |       |      |      | 0.71 | 1.06 |       |       |       | 100   | 74    |
| AX1 B  | 8    | 3        | FeOhy +       | 15.21  |       | 82.94 |      |      | 0.63  |      |      |       |       |      |      |      | 1.22 |       |       |       | 100   | 77    |
| AX1 B  | 8    | 4        | Sp +          | 24.84  | 2.98  | 2.08  |      | 5.13 | 8.15  |      |      |       | 32.49 |      | 0.51 |      |      | 23.95 | -0.12 |       | 100   | 41    |
| AX1 B  | 8    | 5        | Brt + Sp +    | 15.76  | 1.01  | 1.27  |      | 2.62 | 2.49  |      |      |       | 32.73 |      |      |      |      | 8.18  |       | 35.94 | 100   | 112   |
| AX1 B  | 9    | 1        | Qz            | 100.00 |       |       |      |      |       |      |      |       |       |      |      |      |      |       |       |       | 100   | 121   |
| AX1 B  | 9    | 2        | FeOhy +       | 9.50   |       | 87.06 |      |      | 0.65  |      |      |       |       |      | 0.35 |      | 2.44 |       |       |       | 100   | 73    |
| AX1 B  | 9    | 3        | Ap + Qz       | 55.28  |       |       |      |      | 22.61 |      |      | 18.94 | 0.63  | 2.54 |      |      |      |       |       |       | 100   | 111   |
| AX1 B  | 9    | 4        | Ap + Qz       | 46.52  |       |       |      |      | 25.18 | 0.52 |      | 22.86 | 0.76  | 4.16 |      |      |      |       |       |       | 100   | 118   |
| AX1 B  | 9    | 5        | Sp +          | 29.35  | 4.05  | 2.71  |      | 4.27 | 9.67  |      | 0.50 |       | 26.99 |      | 0.57 |      |      | 21.89 |       |       | 100   | 60    |
| AX1 B  | 9    | 6        | FeOhy +       | 17.59  |       | 80.07 | 0.91 |      | 0.49  |      |      |       |       |      |      |      | 0.94 |       |       |       | 100   | 84    |
| AX1 B  | 9    | 7        | Ap + Qz       | 59.98  |       |       |      |      | 18.50 |      |      | 16.21 | 1.82  | 2.79 |      |      |      | 0.70  |       |       | 100   | 100   |
| AX1 B  | 10   | 1        | Qz            | 100.00 |       |       |      |      |       |      |      |       |       |      |      |      |      |       |       |       | 100   | 120   |
| AX1 B  | 10   | 2        | FeOhy +       | 6.99   |       | 91.87 | 0.72 |      | 0.41  |      |      |       |       |      |      |      |      |       |       |       | 100   | 75    |
| AX1 B  | 10   | 3        | Cal + Qz      | 29.90  |       |       |      |      | 70.10 |      |      |       |       |      |      |      |      |       |       |       | 100   | 71    |
| AX1 B  | 10   | 4        | Cal + Qz      | 11.69  |       |       |      | 0.66 | 87.65 |      |      |       |       |      |      |      |      |       |       |       | 100   | 62    |
| AX1 B  | 10   | 5        | Cal + Qz      | 35.59  |       |       |      |      | 64.41 |      |      |       |       |      |      |      |      |       |       |       | 100   | 75    |
| AX1 B  | 10   | 6        | FeOhy +       | 19.96  |       | 79.60 |      |      | 0.43  |      |      |       |       |      |      |      |      |       |       |       | 100   | 83    |
| AX1 B  | 11   | 1        | Qz            | 100.00 |       |       |      |      |       |      |      |       |       |      |      |      |      |       |       |       | 100   | 118   |
| AX1 B  | 11   | 2        | Qz + Ap       | 69.72  |       |       |      |      | 15.08 | 0.34 |      | 12.89 |       | 1.97 |      |      |      |       |       |       | 100   | 116   |
| AX1 B  | 11   | 3        | Cal + Qz      | 43.11  |       |       |      |      | 55.41 |      |      |       | 0.70  |      |      |      |      | 0.78  |       |       | 100   | 78    |
| AX1 B  | 11   | 4        | Cal +         | 7.62   |       |       |      | 0.65 | 91.73 |      |      |       |       |      |      |      |      |       |       |       | 100   | 62    |
| AX1 B  | 11   | 5        | Qz            | 99.33  |       |       |      |      | 0.67  |      |      |       |       |      |      |      |      |       |       |       | 100   | 121   |
| AX1 B  | 11   | 6        | Sp +          | 21.90  | 2.66  | 1.81  |      | 4.77 | 7.02  |      | 0.42 |       | 33.43 |      | 0.59 |      |      | 26.67 | -0.21 | 0.93  | 100   | 100   |
| AX1 B  | 11   | 7        | Cal + Qz      | 32.06  |       |       |      |      | 67.94 |      |      |       |       |      |      |      |      |       |       |       | 100   | 73    |



Supplementary Material S2: SEM-BSE images and Electron Dispersive Spectroscopy (EDS) mineral analyses for sample AX1A.

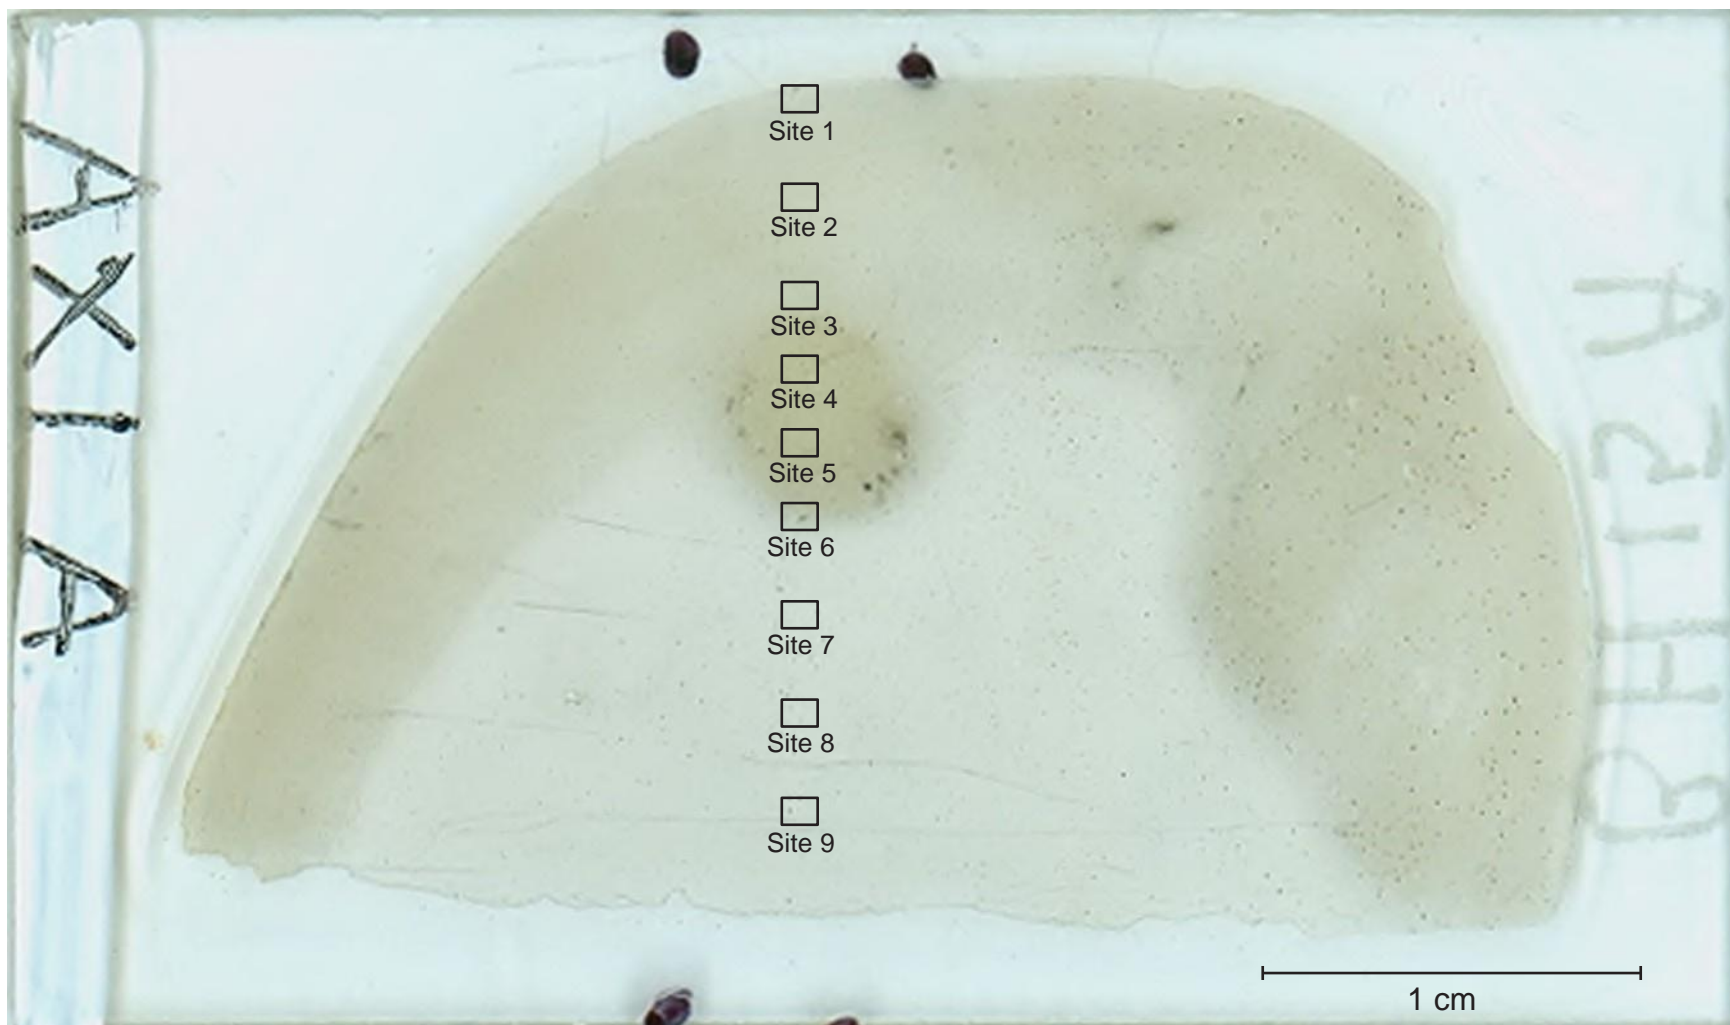

Figure S2.1: AX1 A thin section showing respective sites taken for mineral chemical analyses (EDS) via Scanning Electron Microscope (SEM).

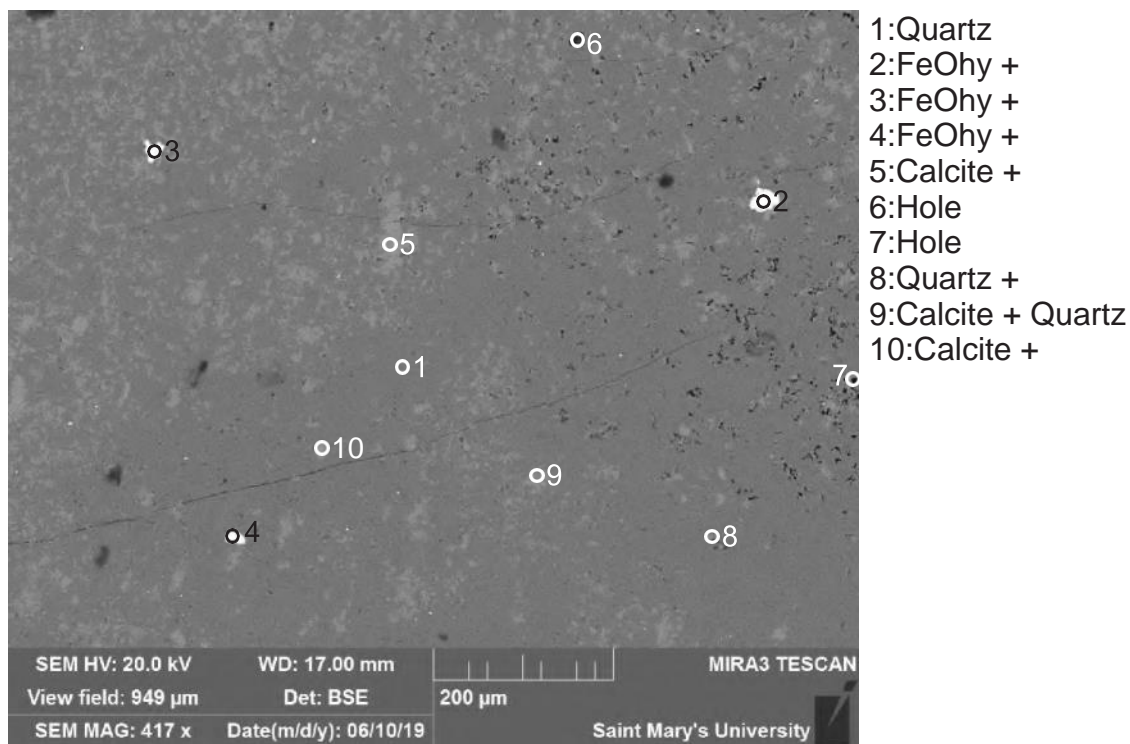

Figure S2.2: AX1 A (SEM) Site 1 (Table S2.1). Scattered blebs of goethite (2-4) and calcite (5,10) in quartz.

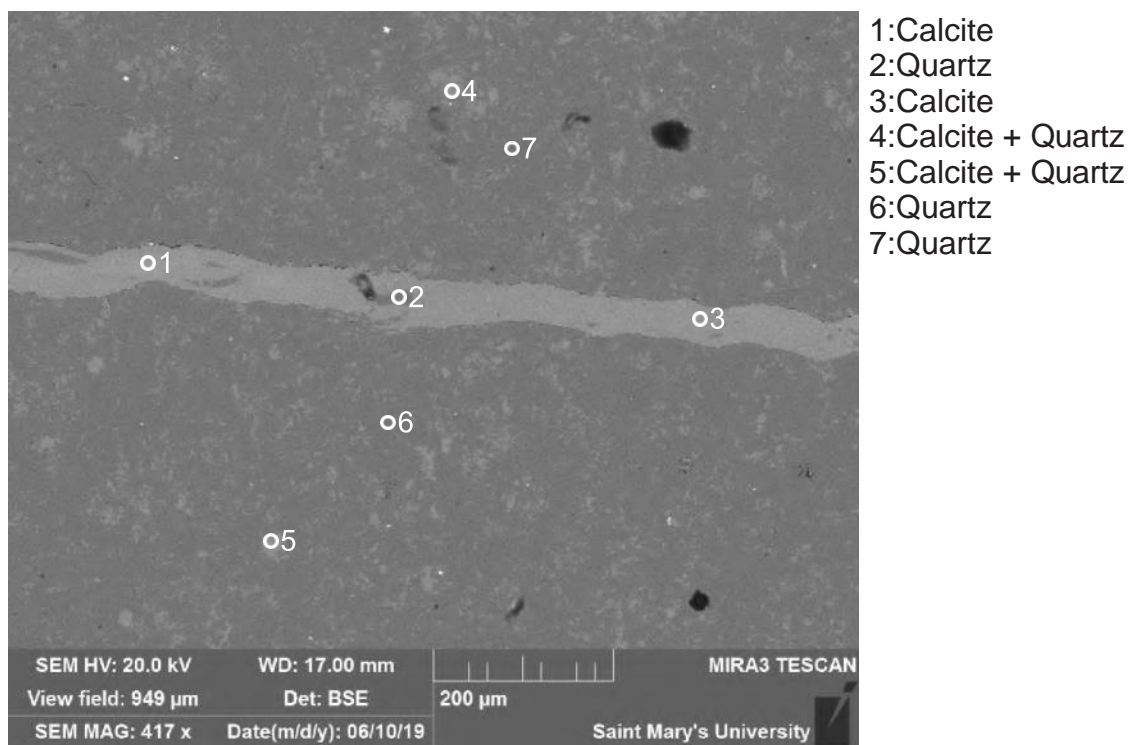

Figure S2.3: AX1 A (SEM) Site 2 (Table S2.1). Similar to Fig. 2 with a vein of calcite (1,3) as well.

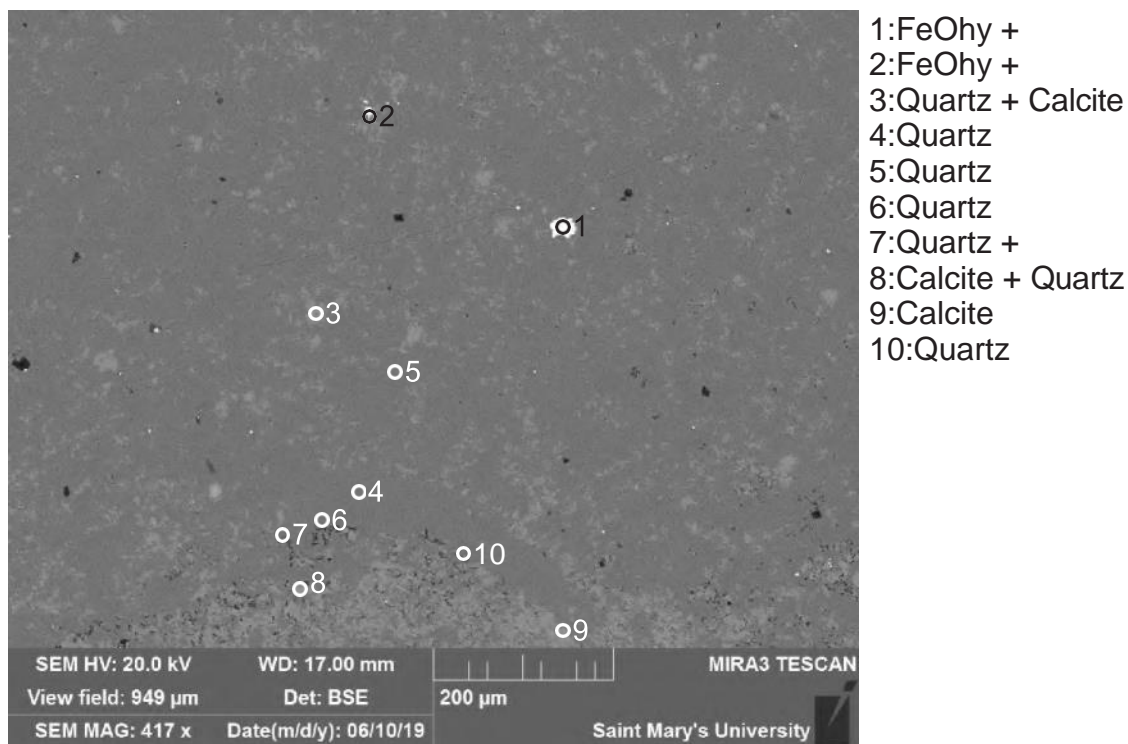

Figure S2.4: AX1 A (SEM) Site 3 (Table S2.1). Similar to Fig. 2.

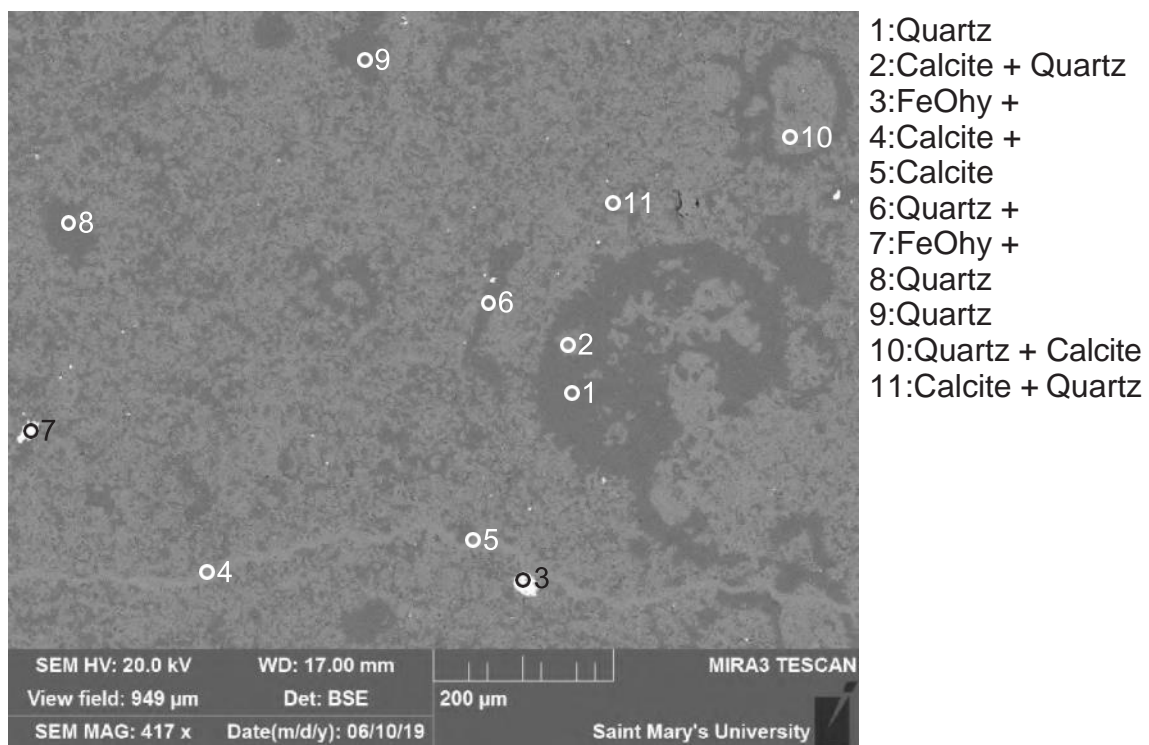

Figure S2.5: AX1 A (SEM) Site 4 (Table S2.1). Similar to Fig. 3, but with more calcite.

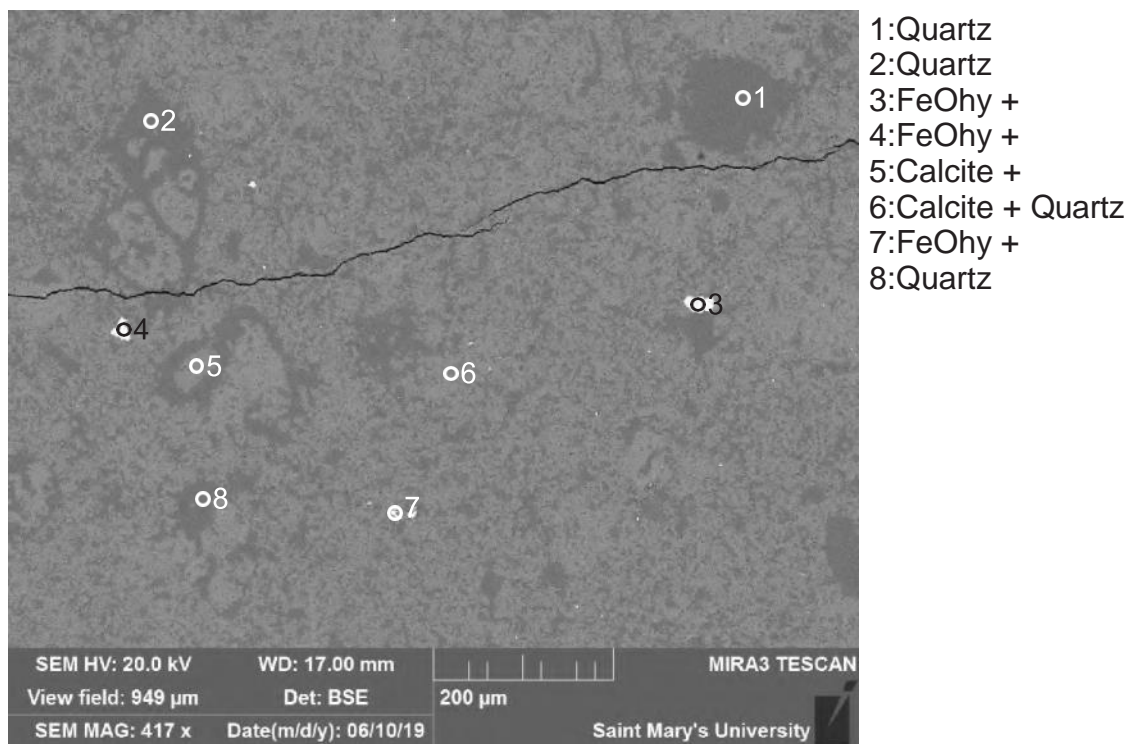

Figure S2.6: AX1 A (SEM) Site 5 (Table S2.1). Abundant calcite, some goethite and some quartz in forms that resemble e.g. foraminifera skeletons.

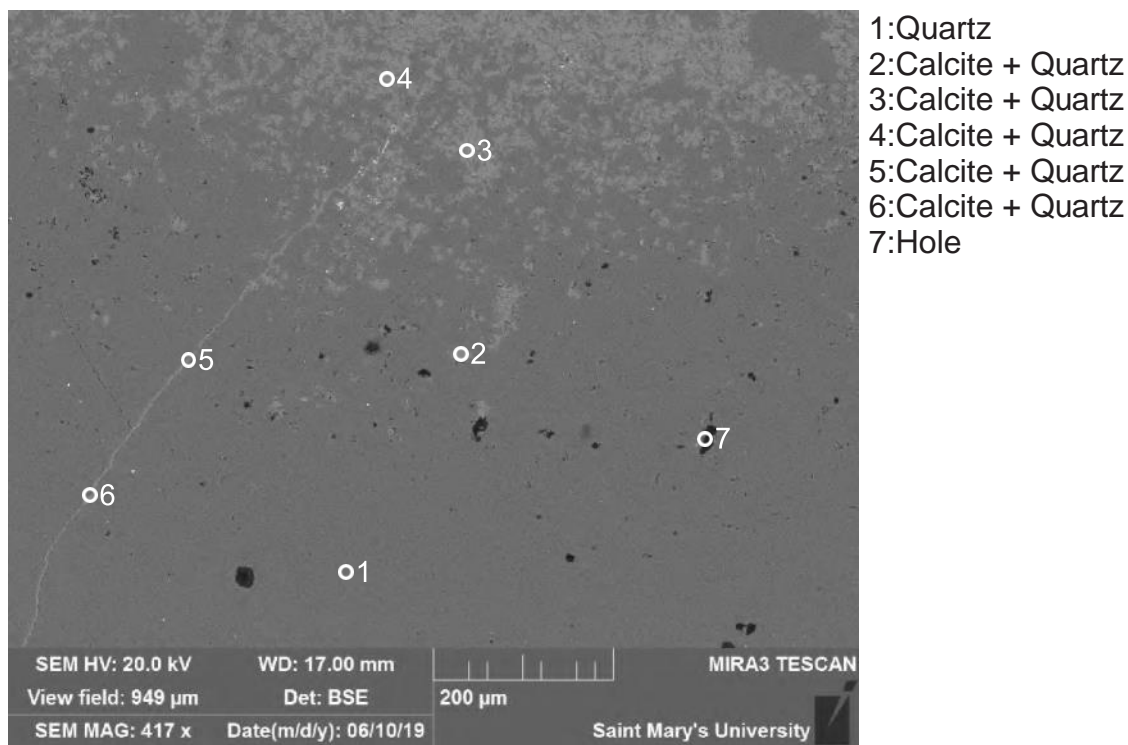

Figure S2.7: AX1 A (SEM) Site 6 (Table S2.1). Similar to Fig. 3. Some porosity (e.g. position 7).



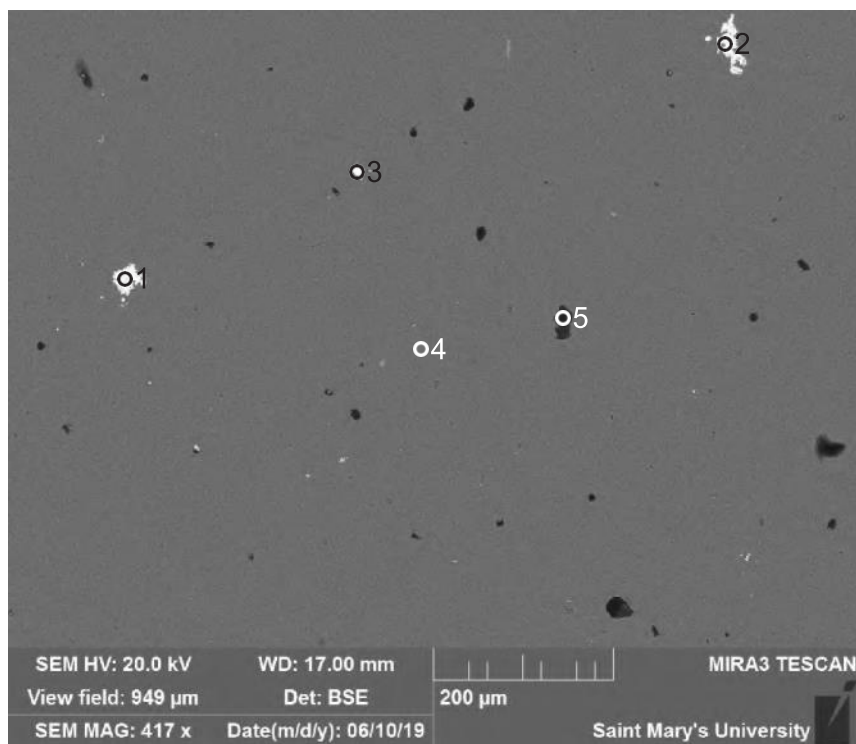

- 1:FeOhy +
- 2:FeOhy +
- 3:FeOhy +
- 4:Quartz
- 5:Hole

Figure S2.8: AX1 A (SEM) Site 7 (Table S2.1). Few blebs of goethite (1-3) in quartz (4). Some porosity (e.g.5).

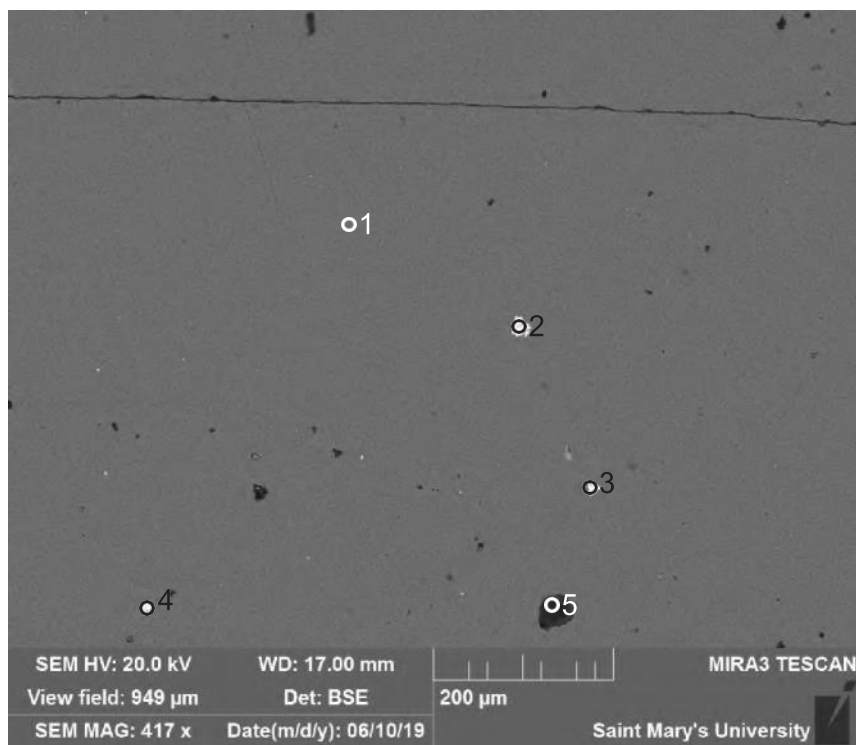

- 1:Quartz
- 2:FeOhy +
- 3:FeOhy +
- 4:FeOhy +
- 5:Hole

Figure S2.9: AX1 A (SEM) Site 8 (Table S2.1). Few blebs of goethite (1-4), and some porosity.



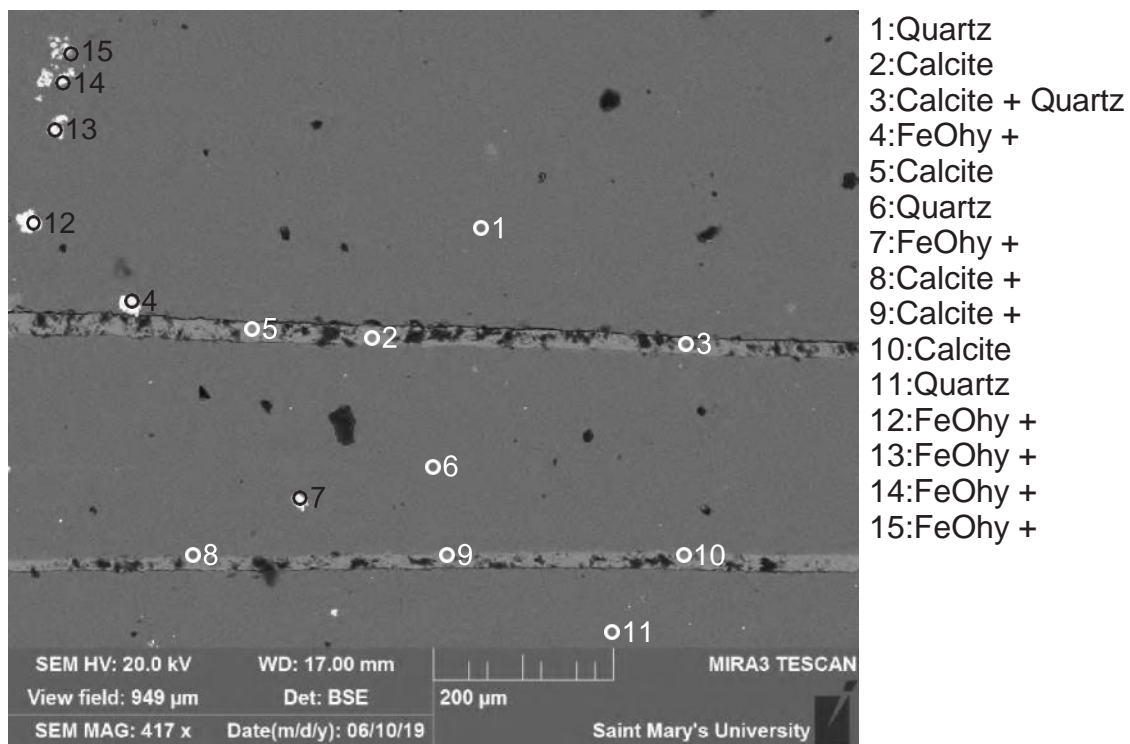

Figure S2.10: AX1 A (SEM) Site 9 (Table S2.1). Several blebs of goethite, some in line (12-15) and two calcite veins with high porosity, all in quartz (1,6,11).

Table S2.1: Scanning Electron Microscope (SEM) mineral chemical analyses (EDS) of AX1 A.

| Sample | Site | Position | Mineral  | SiO2   | TiO2 | Al2O3 | FeO   | MnO  | MgO  | CaO   | Na2O | K2O  | P2O5 | SO3  | Cl   | NiO  | CuO  | Total | Actual Total |
|--------|------|----------|----------|--------|------|-------|-------|------|------|-------|------|------|------|------|------|------|------|-------|--------------|
| AX1 A  | 1    | 1        | Qz       | 100.00 |      |       |       |      |      |       |      |      |      |      |      |      |      | 100   | 122          |
| AX1 A  | 1    | 2        | FeOhy +  | 6.52   | 2.89 | 0.73  | 85.71 | 0.79 |      | 1.02  |      |      |      |      | 0.52 | 0.74 | 1.10 | 100   | 83           |
| AX1 A  | 1    | 3        | FeOhy +  | 6.35   |      |       | 90.63 | 1.01 |      | 0.81  |      |      |      |      | 0.46 |      | 0.74 | 100   | 78           |
| AX1 A  | 1    | 4        | FeOhy +  | 7.18   |      | 0.78  | 86.23 | 0.67 |      | 2.79  |      |      |      |      | 0.35 |      | 1.99 | 100   | 79           |
| AX1 A  | 1    | 5        | Cal + Qz | 5.40   |      |       |       |      | 1.46 | 93.15 |      |      |      |      |      |      |      | 100   | 59           |
| AX1 A  | 1    | 6        | Hole     | 49.54  |      | 1.22  |       |      |      | 49.24 |      |      |      |      |      |      |      | 100   | 33           |
| AX1 A  | 1    | 7        | Hole     | 76.37  |      |       |       |      |      | 18.12 |      |      | 3.53 |      | 1.99 |      |      | 100   | 20           |
| AX1 A  | 1    | 8        | Qz +     | 91.61  |      | 1.05  | 0.65  |      |      | 4.25  | 1.55 |      |      | 0.88 |      |      |      | 100   | 65           |
| AX1 A  | 1    | 9        | Cal + Qz | 15.18  |      | 1.82  |       |      |      | 81.94 |      | 1.06 |      |      |      |      |      | 100   | 65           |
| AX1 A  | 1    | 10       | Cal +    | 4.92   |      |       |       |      | 0.72 | 94.35 |      |      |      |      |      |      |      | 100   | 60           |
| AX1 A  | 2    | 1        | Cal      | 0.73   |      |       |       |      |      | 55.27 |      |      |      |      |      |      |      | 56    | 50           |
| AX1 A  | 2    | 2        | Qz       | 99.58  |      |       |       |      |      | 0.42  |      |      |      |      |      |      |      | 100   | 118          |
| AX1 A  | 2    | 3        | Cal      | 0.81   |      |       |       |      | 0.44 | 54.75 |      |      |      |      |      |      |      | 56    | 61           |
| AX1 A  | 2    | 4        | Cal + Qz | 38.55  |      | 0.72  |       |      |      | 60.73 |      |      |      |      |      |      |      | 100   | 71           |
| AX1 A  | 2    | 5        | Cal + Qz | 11.82  |      |       |       |      | 0.64 | 87.53 |      |      |      |      |      |      |      | 100   | 62           |
| AX1 A  | 2    | 6        | Qz       | 100.00 |      |       |       |      |      |       |      |      |      |      |      |      |      | 100   | 120          |
| AX1 A  | 2    | 7        | Qz       | 100.00 |      |       |       |      |      |       |      |      |      |      |      |      |      | 100   | 119          |
| AX1 A  | 3    | 1        | FeOhy +  | 6.03   |      |       | 92.52 | 0.99 |      | 0.45  |      |      |      |      |      |      |      | 100   | 78           |
| AX1 A  | 3    | 2        | FeOhy +  | 6.47   |      |       | 89.86 | 1.15 |      | 0.98  |      |      |      |      | 0.44 |      | 1.10 | 100   | 77           |
| AX1 A  | 3    | 3        | Qz + Cal | 73.99  |      |       |       |      |      | 26.01 |      |      |      |      |      |      |      | 100   | 91           |
| AX1 A  | 3    | 4        | Qz       | 100.00 |      |       |       |      |      |       |      |      |      |      |      |      |      | 100   | 120          |
| AX1 A  | 3    | 5        | Qz       | 100.00 |      |       |       |      |      |       |      |      |      |      |      |      |      | 100   | 119          |
| AX1 A  | 3    | 6        | Qz       | 98.63  |      |       |       |      |      | 1.37  |      |      |      |      |      |      |      | 100   | 103          |
| AX1 A  | 3    | 7        | Qz +     | 97.65  |      | 0.58  |       |      |      | 1.77  |      |      |      |      |      |      |      | 100   | 85           |
| AX1 A  | 3    | 8        | Cal + Qz | 13.05  |      |       |       |      |      | 86.95 |      |      |      |      |      |      |      | 100   | 62           |
| AX1 A  | 3    | 9        | Cal      | 2.37   |      |       |       |      |      | 53.63 |      |      |      |      |      |      |      | 56    | 61           |
| AX1 A  | 3    | 10       | Qz       | 95.13  |      | 1.36  |       |      |      | 3.35  |      | 0.16 |      |      |      |      |      | 100   | 106          |
| AX1 A  | 4    | 1        | Qz       | 100.00 |      |       |       |      |      |       |      |      |      |      |      |      |      | 100   | 122          |
| AX1 A  | 4    | 2        | Cal + Qz | 38.11  |      |       |       |      |      | 61.89 |      |      |      |      |      |      |      | 100   | 73           |
| AX1 A  | 4    | 3        | FeOhy +  | 5.65   |      |       | 91.62 | 1.00 |      | 1.73  |      |      |      |      |      |      |      | 100   | 80           |
| AX1 A  | 4    | 4        | Cal +    | 2.04   |      |       |       |      |      | 97.96 |      |      |      |      |      |      |      | 100   | 57           |
| AX1 A  | 4    | 5        | Cal      | 1.08   |      |       |       |      | 0.41 | 54.52 |      |      |      |      |      |      |      | 56    | 59           |

Table S2.1: Scanning Electron Microscope (SEM) mineral chemical analyses (EDS) of AX1 A.

| Sample | Site | Position | Mineral  | SiO2   | TiO2 | Al2O3 | FeO   | MnO  | MgO  | CaO   | Na2O | K2O  | P2O5 | SO3 | Cl   | NiO  | CuO  | Total | Actual Total |
|--------|------|----------|----------|--------|------|-------|-------|------|------|-------|------|------|------|-----|------|------|------|-------|--------------|
| AX1 A  | 4    | 6        | Qz +     | 95.97  |      | 2.58  | 0.34  |      |      | 0.43  |      | 0.67 |      |     |      |      |      | 100   | 116          |
| AX1 A  | 4    | 7        | FeOhy +  | 5.23   |      | 0.74  | 91.64 | 1.11 |      | 1.28  |      |      |      |     |      |      |      | 100   | 77           |
| AX1 A  | 4    | 8        | Qz       | 99.66  |      |       |       |      |      | 0.34  |      |      |      |     |      |      |      | 100   | 114          |
| AX1 A  | 4    | 9        | Qz       | 99.66  |      |       |       |      |      | 0.34  |      |      |      |     |      |      |      | 100   | 115          |
| AX1 A  | 4    | 10       | Qz + Cal | 62.67  |      |       |       |      |      | 37.33 |      |      |      |     |      |      |      | 100   | 86           |
| AX1 A  | 4    | 11       | Cal + Qz | 55.13  |      |       |       |      |      | 44.87 |      |      |      |     |      |      |      | 100   | 83           |
| AX1 A  | 5    | 1        | Qz       | 100.00 |      |       |       |      |      |       |      |      |      |     |      |      |      | 100   | 116          |
| AX1 A  | 5    | 2        | Qz       | 99.68  |      |       |       |      |      | 0.32  |      |      |      |     |      |      |      | 100   | 113          |
| AX1 A  | 5    | 3        | FeOhy +  | 6.97   |      | 1.05  | 88.83 | 0.77 |      | 1.49  |      |      |      |     |      |      | 0.88 | 100   | 79           |
| AX1 A  | 5    | 4        | FeOhy +  | 6.56   |      | 1.05  | 86.81 | 0.71 |      | 4.87  |      |      |      |     |      |      |      | 100   | 73           |
| AX1 A  | 5    | 5        | Cal +    | 4.98   |      |       | 1.92  |      | 0.94 | 92.16 |      |      |      |     |      |      |      | 100   | 57           |
| AX1 A  | 5    | 6        | Cal + Qz | 13.82  |      |       |       |      |      | 86.18 |      |      |      |     |      |      |      | 100   | 61           |
| AX1 A  | 5    | 7        | FeOhy +  | 23.68  |      | 1.07  | 70.47 |      |      | 2.92  |      |      |      |     |      | 0.70 | 1.16 | 100   | 85           |
| AX1 A  | 5    | 8        | Qz       | 99.65  |      |       |       |      |      | 0.35  |      |      |      |     |      |      |      | 100   | 113          |
| AX1 A  | 6    | 1        | Qz       | 99.41  |      | 0.59  |       |      |      |       |      |      |      |     |      |      |      | 100   | 115          |
| AX1 A  | 6    | 2        | Cal + Qz | 28.67  |      |       |       |      |      | 71.33 |      |      |      |     |      |      |      | 100   | 65           |
| AX1 A  | 6    | 3        | Cal + Qz | 23.45  |      |       |       |      |      | 76.55 |      |      |      |     |      |      |      | 100   | 63           |
| AX1 A  | 6    | 4        | Cal + Qz | 33.63  |      |       |       |      |      | 66.37 |      |      |      |     |      |      |      | 100   | 66           |
| AX1 A  | 6    | 5        | Cal + Qz | 32.50  |      |       |       |      |      | 67.50 |      |      |      |     |      |      |      | 100   | 68           |
| AX1 A  | 6    | 6        | Cal + Qz | 7.41   |      |       |       |      | 0.88 | 91.70 |      |      |      |     |      |      |      | 100   | 57           |
| AX1 A  | 6    | 7        | Hole     | 72.74  |      | 3.95  | 2.37  |      | 1.31 | 17.22 | 1.20 |      |      |     | 1.20 |      |      | 100   | 29           |
| AX1 A  | 7    | 1        | FeOhy +  | 9.00   |      |       | 86.63 |      |      | 0.96  |      |      | 1.02 |     | 0.53 | 0.74 | 1.13 | 100   | 72           |
| AX1 A  | 7    | 2        | FeOhy +  | 7.82   |      |       | 89.03 | 0.60 |      | 0.70  |      |      |      |     | 0.39 |      | 1.45 | 100   | 74           |
| AX1 A  | 7    | 3        | FeOhy +  | 6.34   |      |       | 92.62 |      |      | 0.71  |      |      |      |     | 0.33 |      |      | 100   | 73           |
| AX1 A  | 7    | 4        | Qz       | 100.00 |      |       |       |      |      |       |      |      |      |     |      |      |      | 100   | 114          |
| AX1 A  | 7    | 5        | Hole     | 47.14  |      | 4.00  | 2.99  |      | 1.77 | 41.52 |      | 0.86 |      |     | 1.72 |      |      | 100   | 20           |
| AX1 A  | 8    | 1        | Qz       | 100.00 |      |       |       |      |      |       |      |      |      |     |      |      |      | 100   | 111          |
| AX1 A  | 8    | 2        | FeOhy +  | 11.07  |      |       | 86.34 | 0.60 |      | 0.60  |      |      |      |     | 0.33 |      | 1.05 | 100   | 76           |
| AX1 A  | 8    | 3        | FeOhy +  | 7.43   |      |       | 91.04 | 0.67 |      |       |      |      |      |     |      |      | 0.87 | 100   | 75           |
| AX1 A  | 8    | 4        | FeOhy +  | 7.07   |      |       | 92.01 | 0.92 |      |       |      |      |      |     |      |      |      | 100   | 72           |
| AX1 A  | 8    | 5        | Hole     | 43.97  |      | 1.76  | 3.20  |      | 1.65 | 48.48 |      |      |      |     | 0.94 |      |      | 100   | 18           |
| AX1 A  | 9    | 1        | Qz       | 100.00 |      |       |       |      |      |       |      |      |      |     |      |      |      | 100   | 111          |

Table S2.1: Scanning Electron Microscope (SEM) mineral chemical analyses (EDS) of AX1 A.

| Sample | Site | Position | Mineral  | SiO2   | TiO2 | Al2O3 | FeO   | MnO  | MgO  | CaO   | Na2O | K2O  | P2O5 | SO3 | Cl   | NiO | CuO  | Total | Actual Total |
|--------|------|----------|----------|--------|------|-------|-------|------|------|-------|------|------|------|-----|------|-----|------|-------|--------------|
| AX1 A  | 9    | 2        | Cal      | 1.13   |      |       |       |      |      | 54.87 |      |      |      |     |      |     |      | 56    | 55           |
| AX1 A  | 9    | 3        | Cal + Qz | 9.70   |      | 1.89  |       |      |      | 87.30 | 1.11 |      |      |     |      |     |      | 100   | 55           |
| AX1 A  | 9    | 4        | FeOhy +  | 7.30   |      |       | 90.69 | 0.88 |      | 0.79  |      |      |      |     | 0.34 |     |      | 100   | 71           |
| AX1 A  | 9    | 5        | Cal      | 0.86   |      |       |       |      |      | 55.14 |      |      |      |     |      |     |      | 56    | 53           |
| AX1 A  | 9    | 6        | Qz       | 100.00 |      |       |       |      |      |       |      |      |      |     |      |     |      | 100   | 113          |
| AX1 A  | 9    | 7        | FeOhy +  | 6.77   |      |       | 91.03 | 0.62 |      | 0.50  |      |      |      |     |      |     | 1.08 | 100   | 72           |
| AX1 A  | 9    | 8        | Cal +    | 4.19   |      |       | 0.67  |      |      | 95.14 |      |      |      |     |      |     |      | 100   | 52           |
| AX1 A  | 9    | 9        | Cal +    | 2.60   |      |       |       |      | 0.84 | 96.56 |      |      |      |     |      |     |      | 100   | 55           |
| AX1 A  | 9    | 10       | Cal      | 0.86   |      |       |       |      |      | 55.14 |      |      |      |     |      |     |      | 56    | 57           |
| AX1 A  | 9    | 11       | Qz       | 100.00 |      |       |       |      |      |       |      |      |      |     |      |     |      | 100   | 117          |
| AX1 A  | 9    | 12       | FeOhy +  | 6.22   |      |       | 93.15 | 0.63 |      |       |      |      |      |     |      |     |      | 100   | 68           |
| AX1 A  | 9    | 13       | FeOhy +  | 5.97   |      |       | 92.88 | 0.76 |      | 0.39  |      |      |      |     |      |     |      | 100   | 70           |
| AX1 A  | 9    | 14       | FeOhy +  | 28.01  |      | 1.12  | 69.45 | 0.62 |      | 0.49  |      | 0.31 |      |     |      |     |      | 100   | 74           |
| AX1 A  | 9    | 15       | FeOhy +  | 11.74  |      |       | 86.74 | 1.00 |      | 0.53  |      |      |      |     |      |     |      | 100   | 72           |

Supplementary Material S3: SEM-BSE images and Electron Dispersive Spectroscopy (EDS) mineral analyses for sample AX1C.

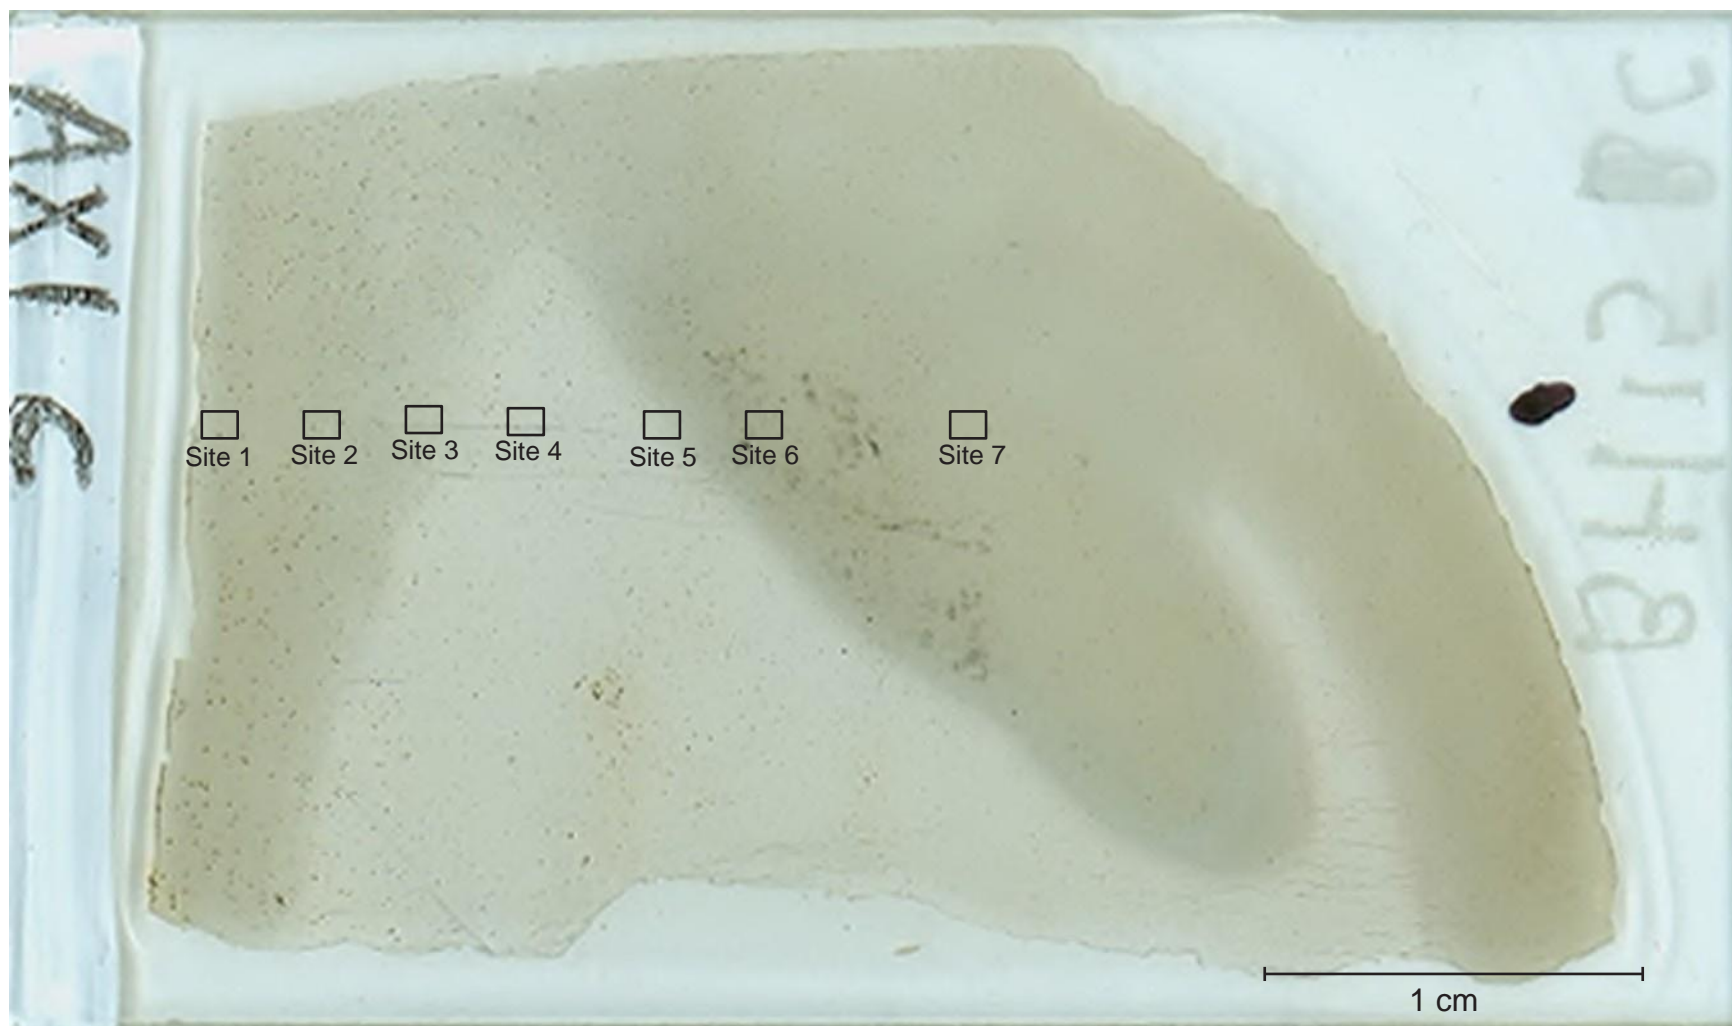

Figure S3.1: AX1 C thin section showing respective sites taken for mineral chemical analyses (EDS) via Scanning Electron Microscope (SEM).



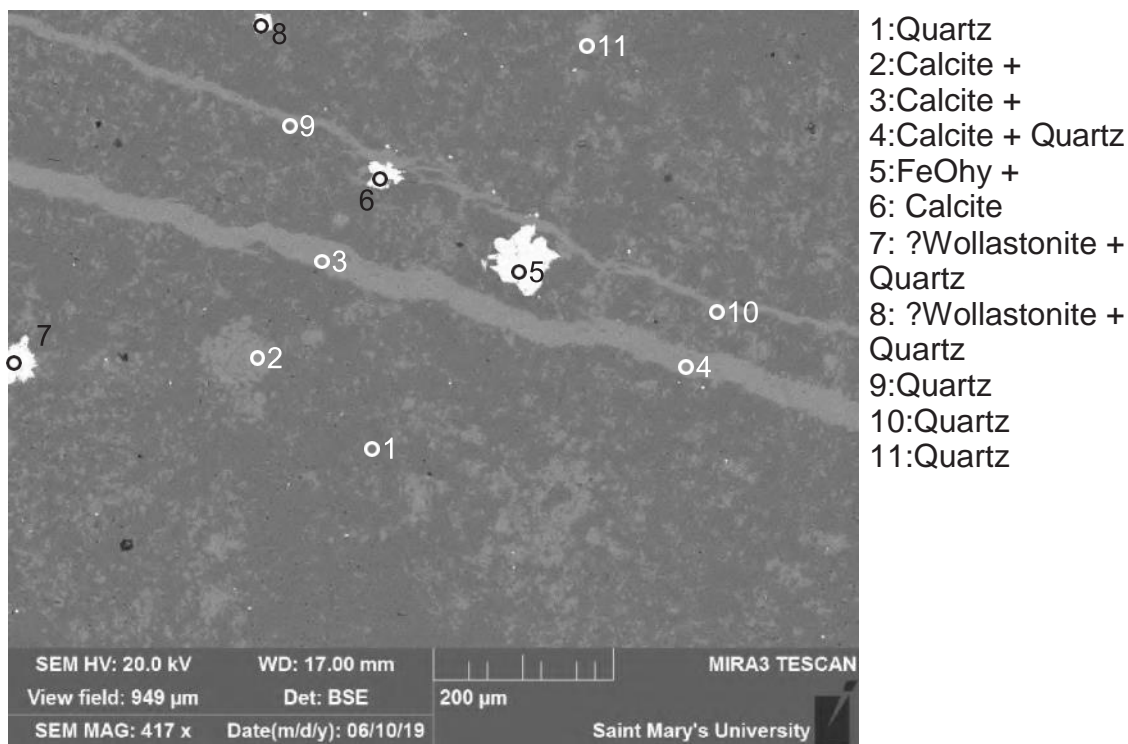

Figure S3.2: AX1 C (SEM) Site 1 (Table S3.1). Mixture of calcite and quartz cut by calcite veins. Two analyzes of wollastonite (7,8) appear to be late mineral blebs.

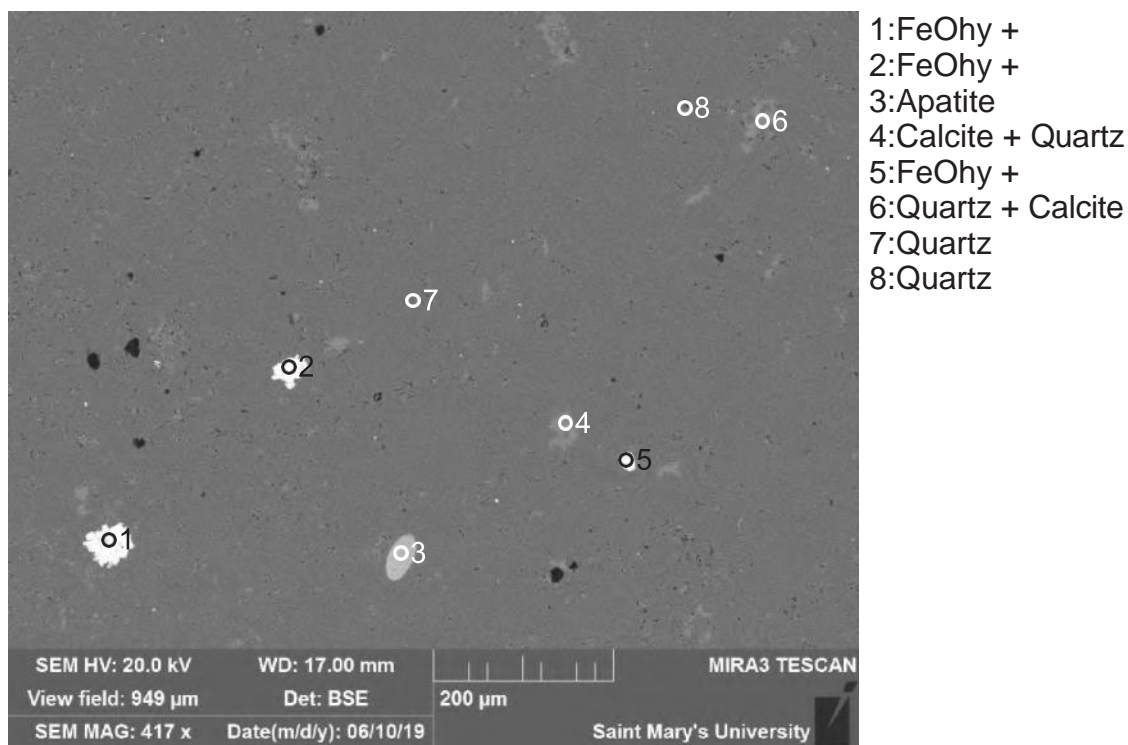

Figure S3.3: AX1 C (SEM) Site 2 (Table S3.1). Scattered blebs of goethite (1-2), calcite (4,6) and apatite (3, ellipse) in quartz (7). The apatite (3) probably fills fossil.

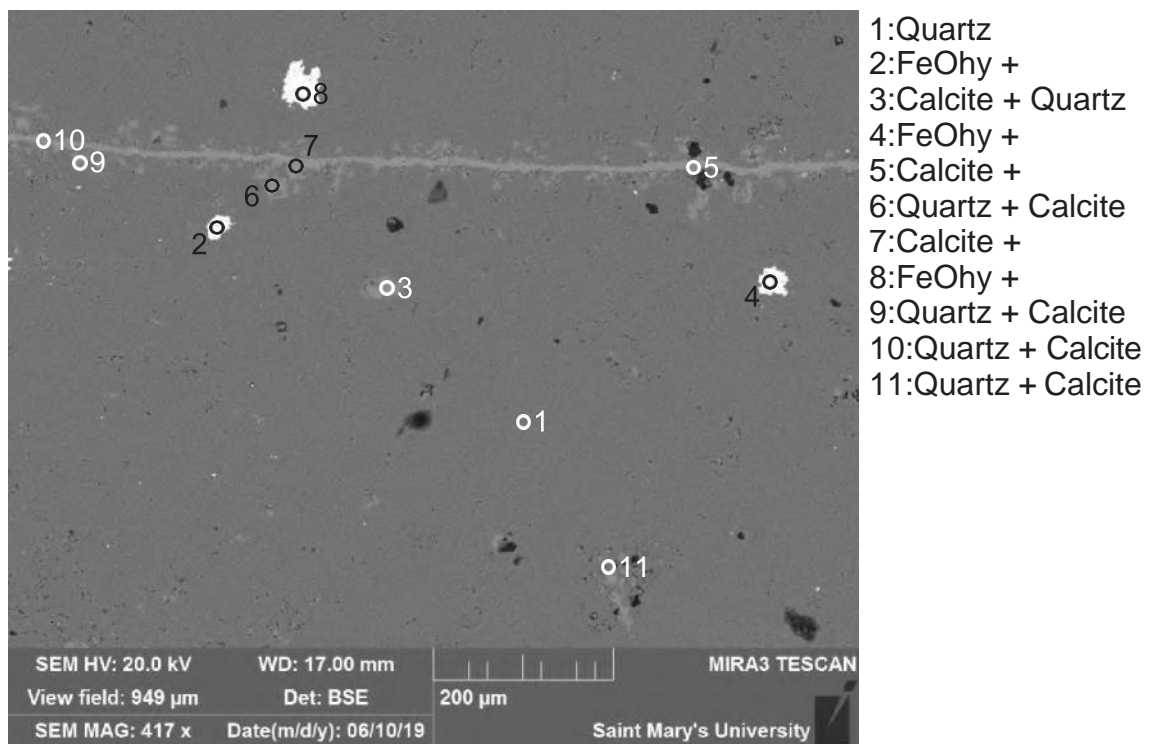

Figure S3.4: AX1 C (SEM) Site 3 (Table S3.1). FeOhy blebs in quartz. Calcite vein cuts quartz and a void (5). Porosity.

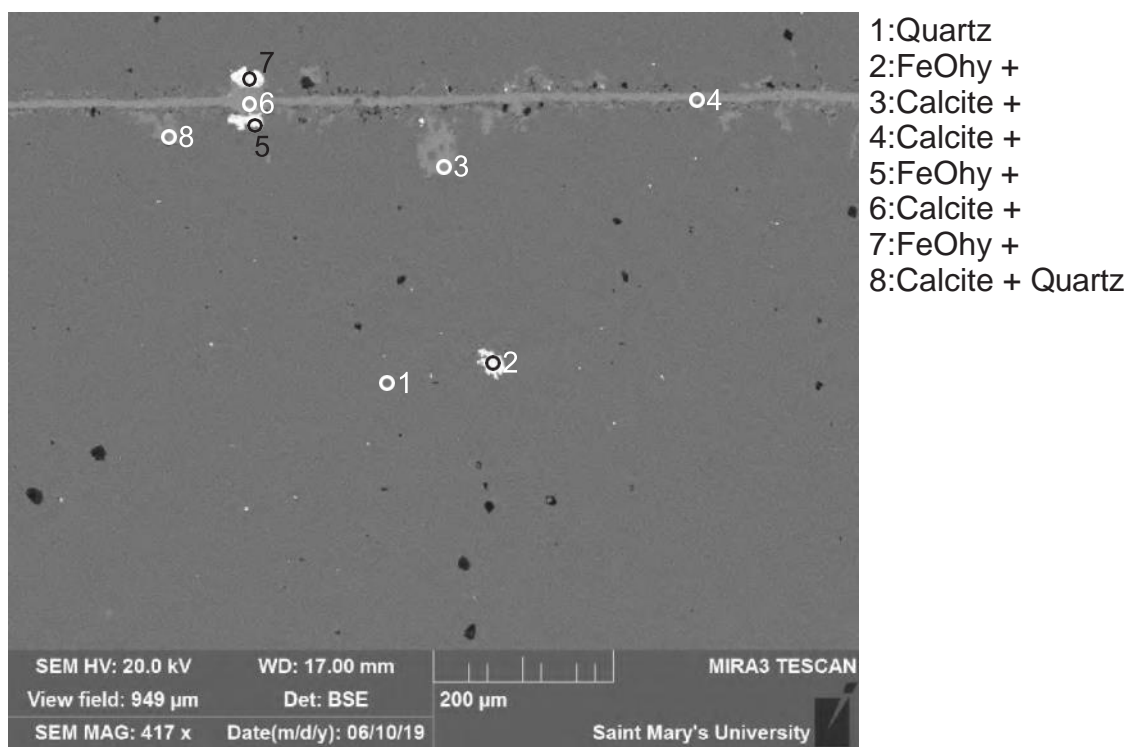

Figure S3.5: AX1 C (SEM) Site 4 (Table S3.1). Similar to figure 4. FeOhy (5,7) appears to postdate calcite.

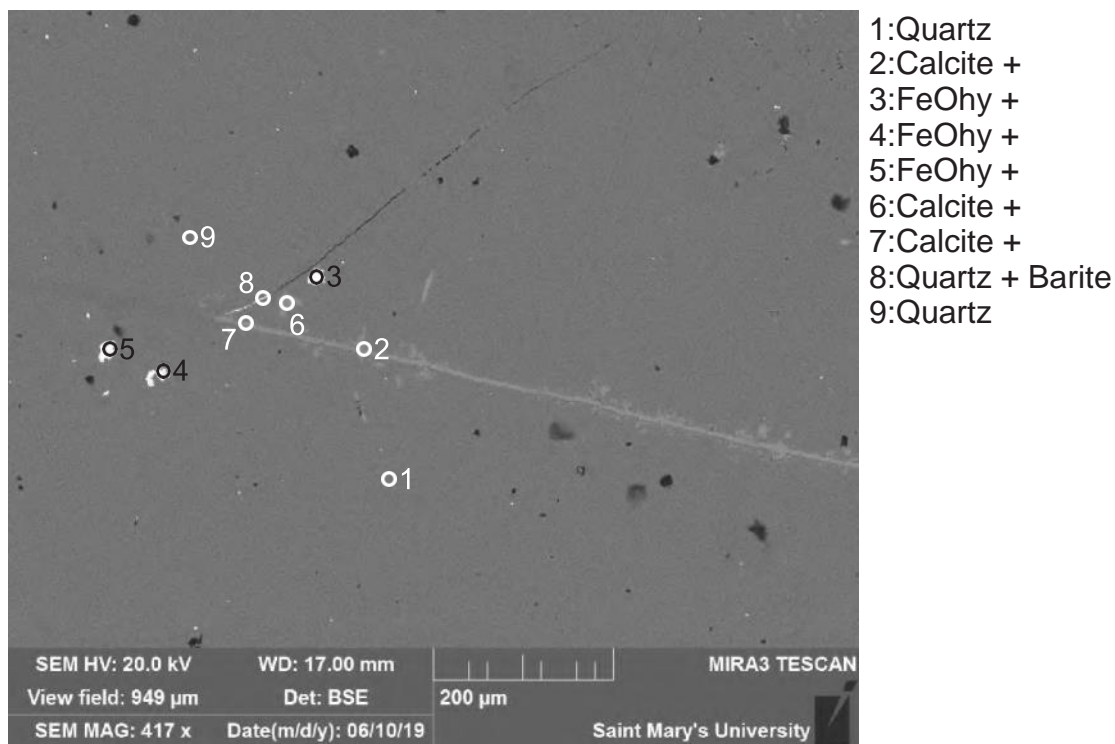

Figure S3.6: AX1 C (SEM) Site 5 (Table S3.1).

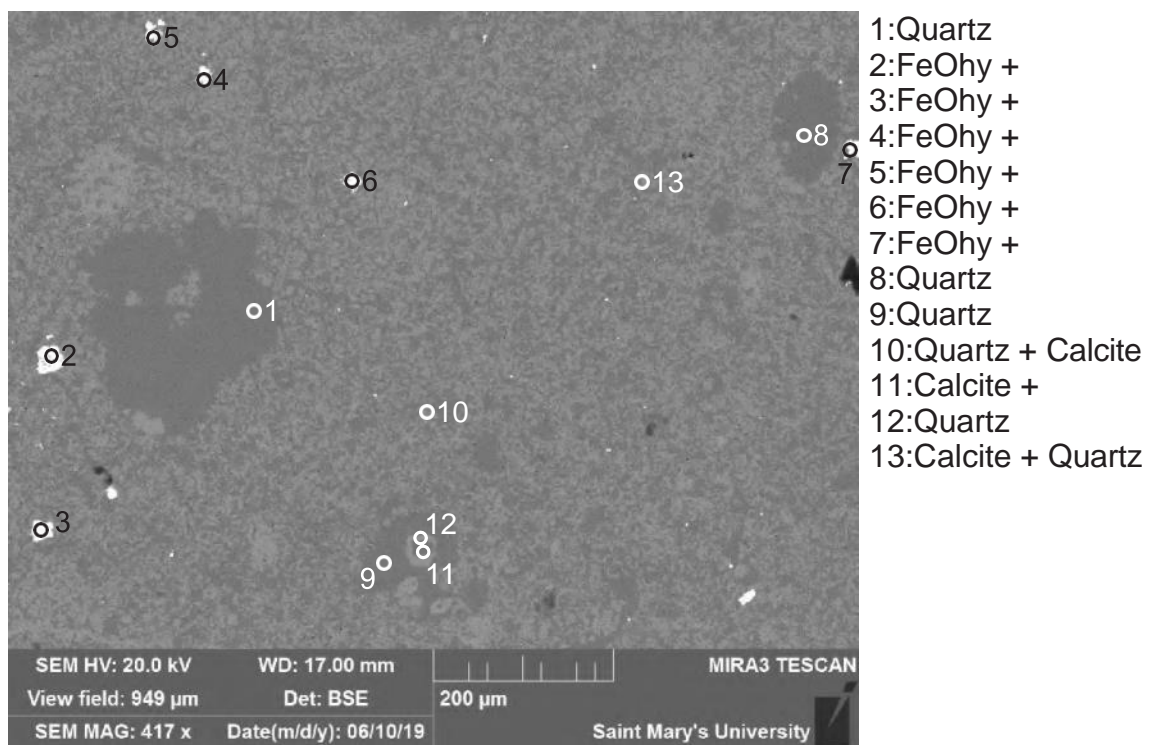

Figure S3.7: AX1 C (SEM) Site 6 (Table S3.1). FeOhy blebs in calcite and quartz mixture. The quartz (8) probably fills fossil.

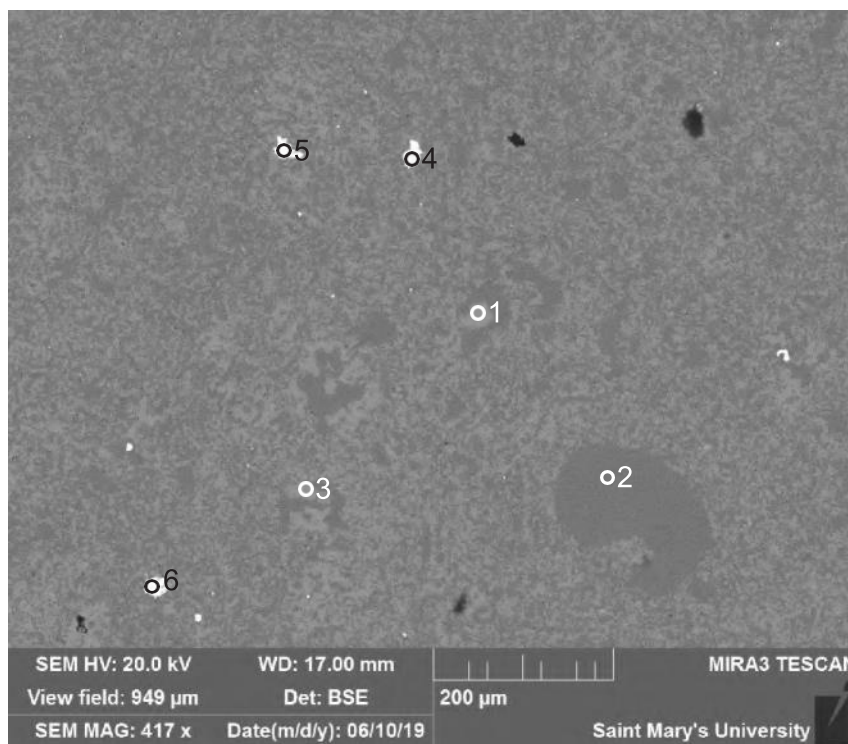

- 1: Calcite +
- 2: Quartz
- 3: Calcite +
- 4: FeOhy +
- 5: FeOhy +
- 6: FeOhy +

Figure S3.8: AX1 C (SEM) Site 7 (Table S3.1). Similar to Fig. 7. Quartz (2) probably fills fossil.

Table S3.1: Scanning Electron Microscope (SEM) mineral chemical analyses (EDS) of AX1 C.

| Site | Position | Mineral  | SiO2   | Al2O3 | FeO   | MnO  | MgO  | CaO   | Na2O | K2O  | P2O5  | SO3  | F    | Cl   | NiO | CuO  | BaO | WO3  | Total | Actual Total |
|------|----------|----------|--------|-------|-------|------|------|-------|------|------|-------|------|------|------|-----|------|-----|------|-------|--------------|
| 1    | 1        | Qz       | 100.00 |       |       |      |      |       |      |      |       |      |      |      |     |      |     |      | 100   | 122          |
| 1    | 2        | Cal +    | 5.92   | 1.68  |       |      | 1.12 | 90.79 |      | 0.49 |       |      |      |      |     |      |     |      | 100   | 61           |
| 1    | 3        | Cal +    | 2.95   |       |       |      |      | 97.05 |      |      |       |      |      |      |     |      |     |      | 100   | 58           |
| 1    | 4        | Cal + Qz | 20.18  |       |       |      |      | 79.82 |      |      |       |      |      |      |     |      |     |      | 100   | 69           |
| 1    | 5        | FeOhy +  | 9.15   |       | 89.29 |      |      | 0.85  |      |      |       |      |      |      |     | 0.70 |     |      | 100   | 79           |
| 1    | 6        | Cal      | 1.10   |       |       |      | 0.49 | 54.41 |      |      |       |      |      |      |     |      |     |      | 56    | 58           |
| 1    | 7        | ?Wo + Qz | 78.44  |       | 3.99  |      |      | 17.57 |      |      |       |      |      |      |     |      |     |      | 100   | 99           |
| 1    | 8        | ?Wo + Qz | 77.49  |       |       |      |      | 22.51 |      |      |       |      |      |      |     |      |     |      | 100   | 96           |
| 1    | 9        | Qz       | 99.79  |       |       |      |      | 0.21  |      |      |       |      |      |      |     |      |     |      | 100   | 119          |
| 1    | 10       | Qz       | 99.13  | 0.62  |       |      |      | 0.26  |      |      |       |      |      |      |     |      |     |      | 100   | 125          |
| 1    | 11       | Qz       | 89.99  |       |       |      |      | 10.01 |      |      |       |      |      |      |     |      |     |      | 100   | 111          |
| 2    | 1        | FeOhy +  | 9.00   | 0.71  | 86.87 |      |      | 2.49  |      |      | 0.94  |      |      |      |     |      |     |      | 100   | 78           |
| 2    | 2        | FeOhy +  | 7.13   |       | 91.48 | 0.85 |      | 0.54  |      |      |       |      |      |      |     |      |     |      | 100   | 80           |
| 2    | 3        | Ap       | 0.57   |       |       |      |      | 48.61 | 0.96 |      | 42.66 | 1.21 | 4.62 |      |     |      |     | 1.38 | 100   | 116          |
| 2    | 4        | Cal + Qz | 15.36  |       |       |      |      | 84.65 |      |      |       |      |      |      |     |      |     |      | 100   | 65           |
| 2    | 5        | FeOhy +  | 6.24   |       | 92.37 | 0.83 |      | 0.55  |      |      |       |      |      |      |     |      |     |      | 100   | 82           |
| 2    | 6        | Qz + Cal | 55.08  |       |       |      |      | 44.92 |      |      |       |      |      |      |     |      |     |      | 100   | 86           |
| 2    | 7        | Qz       | 100.00 |       |       |      |      |       |      |      |       |      |      |      |     |      |     |      | 100   | 122          |
| 2    | 8        | Qz       | 100.00 |       |       |      |      |       |      |      |       |      |      |      |     |      |     |      | 100   | 122          |
| 3    | 1        | Qz       | 100.00 |       |       |      |      |       |      |      |       |      |      |      |     |      |     |      | 100   | 125          |
| 3    | 2        | FeOhy +  | 10.57  | 1.25  | 86.63 |      |      | 1.22  |      |      |       |      |      | 0.33 |     |      |     |      | 100   | 75           |
| 3    | 3        | Cal + Qz | 18.88  |       |       |      | 0.65 | 80.46 |      |      |       |      |      |      |     |      |     |      | 100   | 66           |
| 3    | 4        | FeOhy +  | 6.99   |       | 91.72 | 0.73 |      | 0.56  |      |      |       |      |      |      |     |      |     |      | 100   | 81           |
| 3    | 5        | Cal +    | 2.41   |       |       |      |      | 97.59 |      |      |       |      |      |      |     |      |     |      | 100   | 58           |
| 3    | 6        | Qz + Cal | 66.25  |       |       |      |      | 33.75 |      |      |       |      |      |      |     |      |     |      | 100   | 88           |
| 3    | 7        | Cal +    | 2.07   |       |       |      |      | 97.93 |      |      |       |      |      |      |     |      |     |      | 100   | 57           |
| 3    | 8        | FeOhy +  | 9.14   |       | 90.35 |      |      | 0.50  |      |      |       |      |      |      |     |      |     |      | 100   | 77           |
| 3    | 9        | Qz + Cal | 86.17  |       |       |      |      | 13.83 |      |      |       |      |      |      |     |      |     |      | 100   | 101          |
| 3    | 10       | Qz + Cal | 81.02  |       |       |      |      | 18.98 |      |      |       |      |      |      |     |      |     |      | 100   | 96           |
| 3    | 11       | Qz + Cal | 87.51  |       |       |      |      | 12.49 |      |      |       |      |      |      |     |      |     |      | 100   | 108          |
| 4    | 1        | Qz       | 100.00 |       |       |      |      |       |      |      |       |      |      |      |     |      |     |      | 100   | 124          |
| 4    | 2        | FeOhy +  | 8.61   |       | 88.62 | 0.67 |      | 0.63  |      |      |       |      |      | 0.31 |     | 1.17 |     |      | 100   | 80           |
| 4    | 3        | Cal +    | 2.47   |       |       |      |      | 97.53 |      |      |       |      |      |      |     |      |     |      | 100   | 58           |
| 4    | 4        | Cal +    | 10.11  |       |       |      | 0.60 | 89.29 |      |      |       |      |      |      |     |      |     |      | 100   | 63           |

Table S3.1: Scanning Electron Microscope (SEM) mineral chemical analyses (EDS) of AX1 C.

| Site | Position | Mineral  | SiO2   | Al2O3 | FeO   | MnO  | MgO  | CaO   | Na2O | K2O  | P2O5 | SO3   | F | Cl   | NiO  | CuO  | BaO   | WO3 | Total | Actual Total |
|------|----------|----------|--------|-------|-------|------|------|-------|------|------|------|-------|---|------|------|------|-------|-----|-------|--------------|
| 4    | 5        | FeOhy +  | 6.34   | 0.71  | 90.57 | 1.33 |      | 1.05  |      |      |      |       |   |      |      |      |       |     | 100   | 77           |
| 4    | 6        | Cal +    | 1.60   |       | 0.73  |      | 0.84 | 96.83 |      |      |      |       |   |      |      |      |       |     | 100   | 57           |
| 4    | 7        | FeOhy +  | 12.82  | 3.59  | 80.82 | 0.51 |      | 1.21  |      | 0.66 |      |       |   | 0.39 |      |      |       |     | 100   | 79           |
| 4    | 8        | Cal + Qz | 48.88  |       |       |      |      | 51.12 |      |      |      |       |   |      |      |      |       |     | 100   | 80           |
| 5    | 1        | Qz       | 100.00 |       |       |      |      |       |      |      |      |       |   |      |      |      |       |     | 100   | 124          |
| 5    | 2        | Cal +    | 5.10   |       |       |      | 1.04 | 93.86 |      |      |      |       |   |      |      |      |       |     | 100   | 60           |
| 5    | 3        | FeOhy +  | 8.48   | 1.17  | 85.60 | 2.41 |      | 1.07  |      |      |      |       |   | 0.44 |      | 0.84 |       |     | 100   | 78           |
| 5    | 4        | FeOhy +  | 10.30  | 1.40  | 84.91 |      |      | 1.02  |      |      |      |       |   | 0.51 | 0.66 | 1.20 |       |     | 100   | 79           |
| 5    | 5        | FeOhy +  | 9.85   |       | 87.49 | 0.88 |      | 0.76  |      |      |      |       |   |      |      | 1.02 |       |     | 100   | 75           |
| 5    | 6        | Cal +    | 2.53   |       |       |      |      | 97.47 |      |      |      |       |   |      |      |      |       |     | 100   | 57           |
| 5    | 7        | Cal +    | 4.11   |       |       |      | 1.06 | 94.84 |      |      |      |       |   |      |      |      |       |     | 100   | 58           |
| 5    | 8        | Qz + Brt | 68.23  |       |       |      |      | 0.63  |      |      |      | 12.26 |   |      |      |      | 18.88 |     | 100   | 132          |
| 5    | 9        | Qz       | 100.00 |       |       |      |      |       |      |      |      |       |   |      |      |      |       |     | 100   | 120          |
| 6    | 1        | Qz       | 100.00 |       |       |      |      |       |      |      |      |       |   |      |      |      |       |     | 100   | 120          |
| 6    | 2        | FeOhy +  | 9.75   | 1.22  | 85.30 | 0.82 |      | 1.76  |      |      | 1.15 |       |   |      |      |      |       |     | 100   | 77           |
| 6    | 3        | FeOhy +  | 7.53   | 1.07  | 87.50 | 0.79 |      | 1.25  |      |      |      |       |   |      | 0.92 | 0.93 |       |     | 100   | 79           |
| 6    | 4        | FeOhy +  | 9.13   |       | 87.23 | 0.67 |      | 1.69  |      |      |      |       |   |      |      | 1.27 |       |     | 100   | 79           |
| 6    | 5        | FeOhy +  | 5.57   |       | 92.15 | 0.92 |      | 1.36  |      |      |      |       |   |      |      |      |       |     | 100   | 77           |
| 6    | 6        | FeOhy +  | 6.18   |       | 90.12 | 0.71 |      | 1.54  |      |      |      |       |   |      |      | 1.45 |       |     | 100   | 79           |
| 6    | 7        | FeOhy +  | 8.13   | 1.02  | 89.18 | 0.53 |      | 1.14  |      |      |      |       |   |      |      |      |       |     | 100   | 81           |
| 6    | 8        | Qz       | 98.99  | 0.81  |       |      |      |       |      | 0.19 |      |       |   |      |      |      |       |     | 100   | 123          |
| 6    | 9        | Qz       | 99.75  |       |       |      |      | 0.25  |      |      |      |       |   |      |      |      |       |     | 100   | 124          |
| 6    | 10       | Qz + Cal | 55.04  |       |       |      |      | 44.96 |      |      |      |       |   |      |      |      |       |     | 100   | 86           |
| 6    | 11       | Cal +    | 1.50   |       |       |      |      | 98.50 |      |      |      |       |   |      |      |      |       |     | 100   | 61           |
| 6    | 12       | Qz       | 99.05  | 0.60  |       |      |      | 0.35  |      |      |      |       |   |      |      |      |       |     | 100   | 124          |
| 6    | 13       | Cal + Qz | 38.47  |       |       |      |      | 61.53 |      |      |      |       |   |      |      |      |       |     | 100   | 75           |
| 7    | 1        | Cal +    | 1.78   |       |       |      | 0.93 | 97.29 |      |      |      |       |   |      |      |      |       |     | 100   | 60           |
| 7    | 2        | Qz       | 100.00 |       |       |      |      |       |      |      |      |       |   |      |      |      |       |     | 100   | 125          |
| 7    | 3        | Cal +    | 3.66   |       |       |      | 0.68 | 95.67 |      |      |      |       |   |      |      |      |       |     | 100   | 61           |
| 7    | 4        | FeOhy +  | 6.38   | 0.96  | 88.05 | 0.91 |      | 2.27  |      |      |      |       |   |      |      | 1.45 |       |     | 100   | 79           |
| 7    | 5        | FeOhy +  | 6.20   | 0.81  | 89.42 | 1.19 |      | 1.24  |      |      |      |       |   |      |      | 1.15 |       |     | 100   | 79           |
| 7    | 6        | FeOhy +  | 6.11   |       | 91.52 | 1.13 |      | 1.23  |      |      |      |       |   |      |      |      |       |     | 100   | 79           |



Supplementary Material S4: SEM-BSE images and Electron Dispersive Spectroscopy (EDS) mineral analyses for sample AX2.

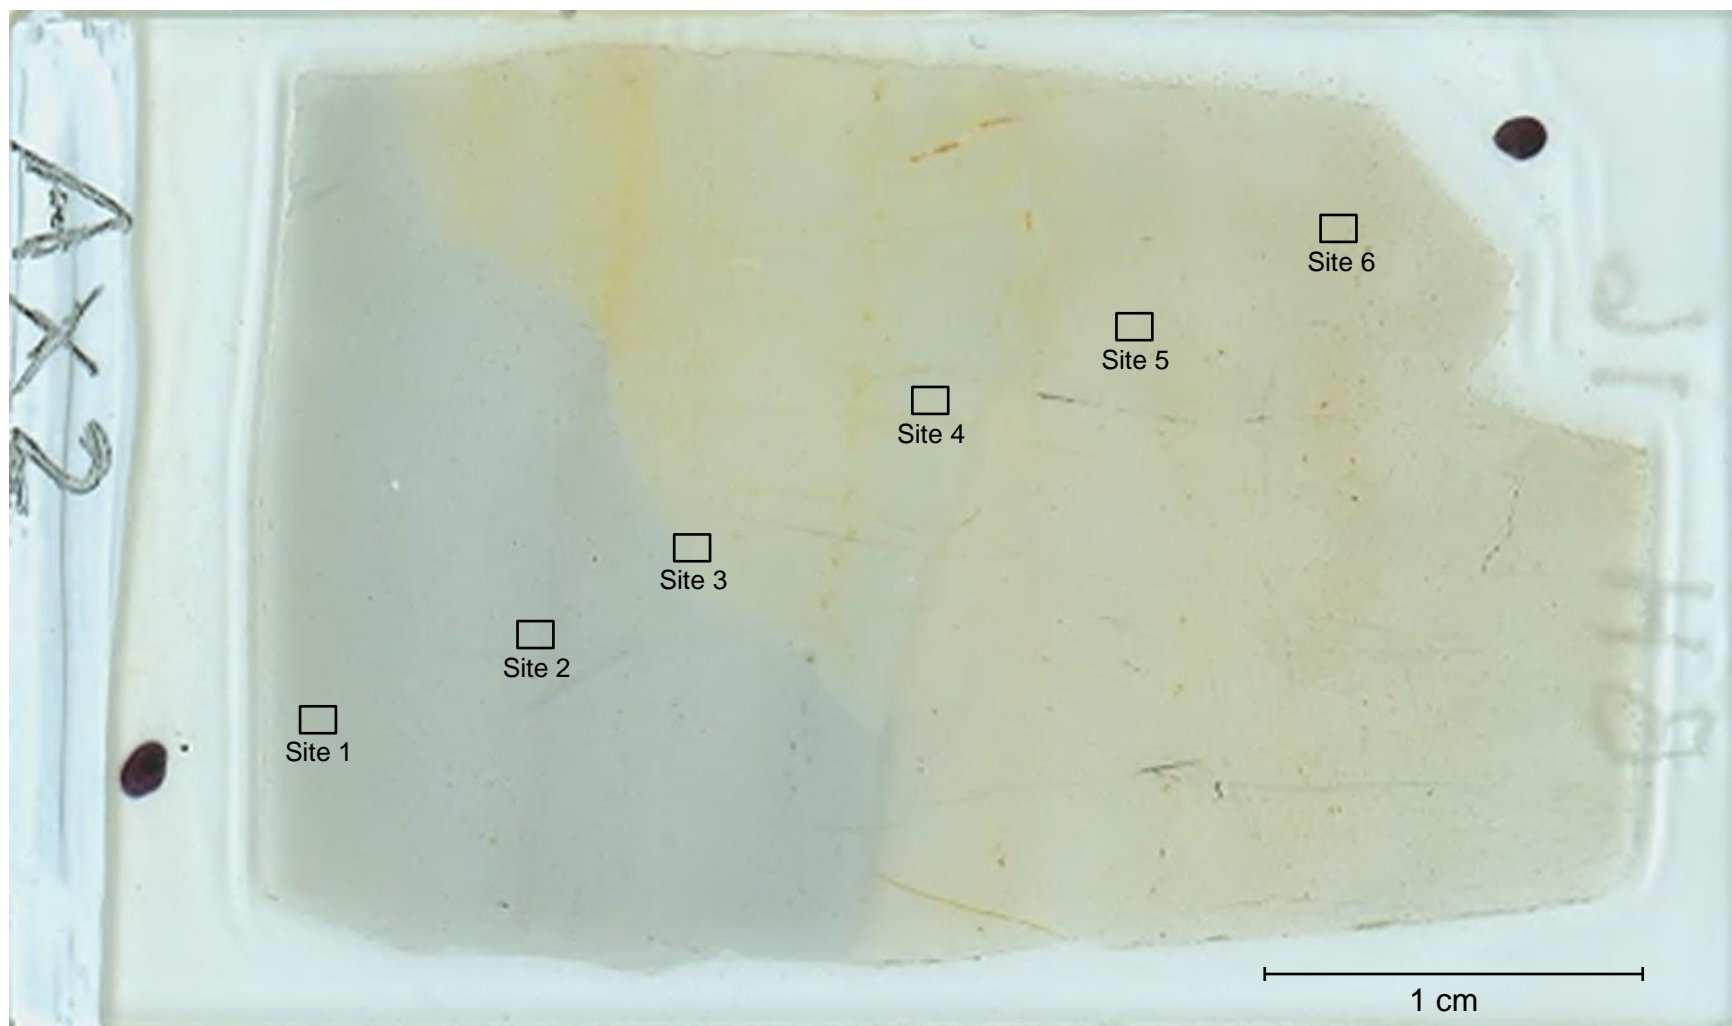

Figure S4.1: AX2 thin section showing respective sites taken for mineral chemical analyses (EDS) via Scanning Electron Microscope (SEM).

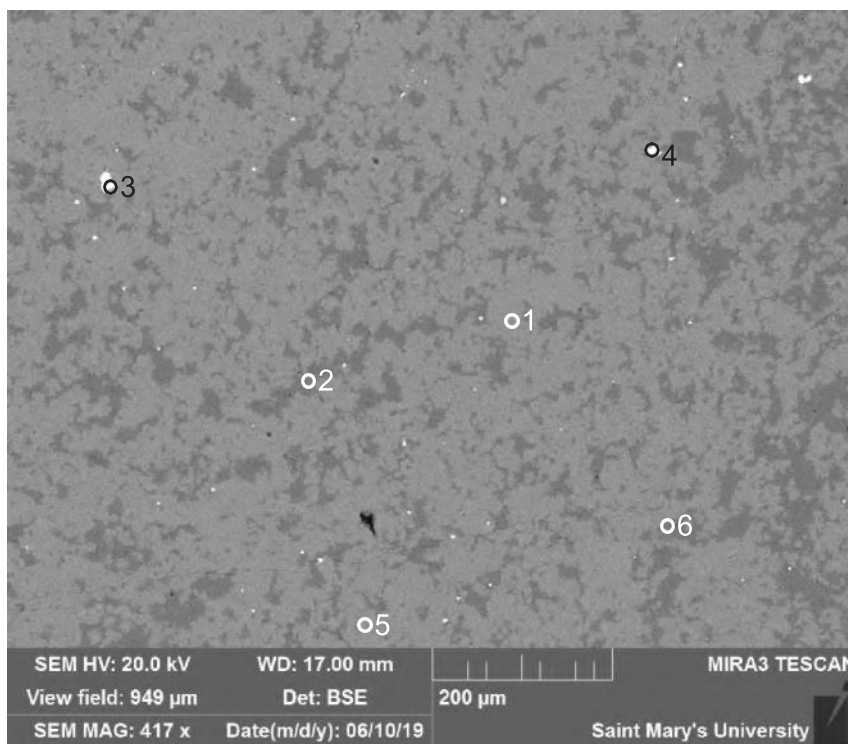

- 1: Calcite + Quartz
- 2: Calcite + Quartz
- 3: Pyrite
- 4: Quartz + Calcite
- 5: Calcite + Quartz
- 6: Calcite + Quartz

Figure S4.2: AX2 (SEM) Site 1 (Table S4.1). Mostly calcite mixed with some quartz. A pyrite bleb

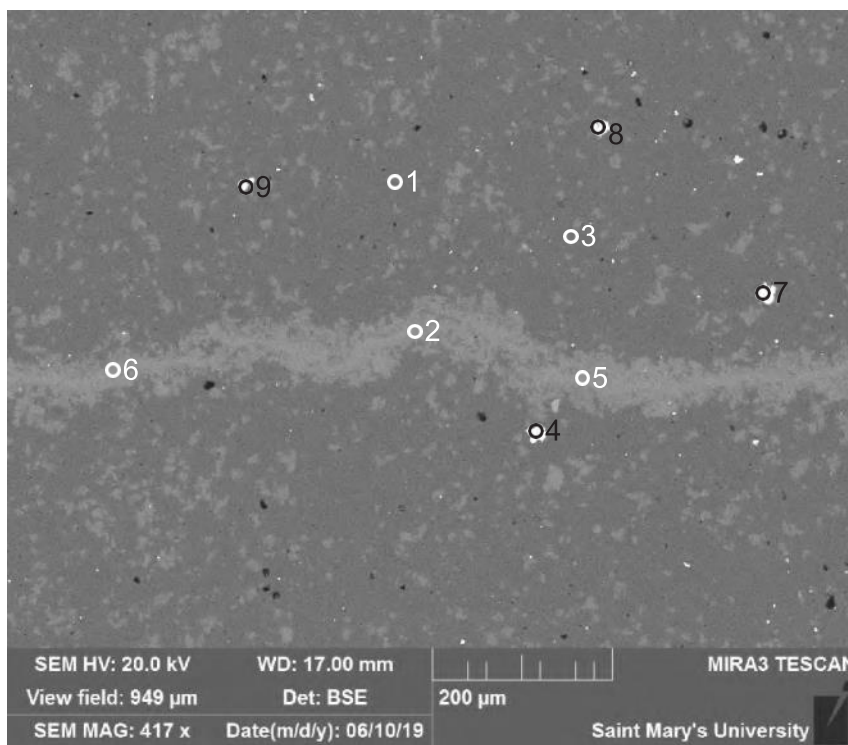

- 1: Quartz
- 2: Calcite + Quartz
- 3: Quartz
- 4: Pyrite
- 5: Calcite
- 6: Calcite + Quartz
- 7: Pyrite
- 8: Pyrite + Nickel
- 9: Quartz

Figure S4.3: AX2 (SEM) Site 2 (Table S4.1). Scattered pyrite blebs (4,7,8) in a mixture of quartz (1) and calcite all cut by a calcite vein (2,5,6). There is some porosity.

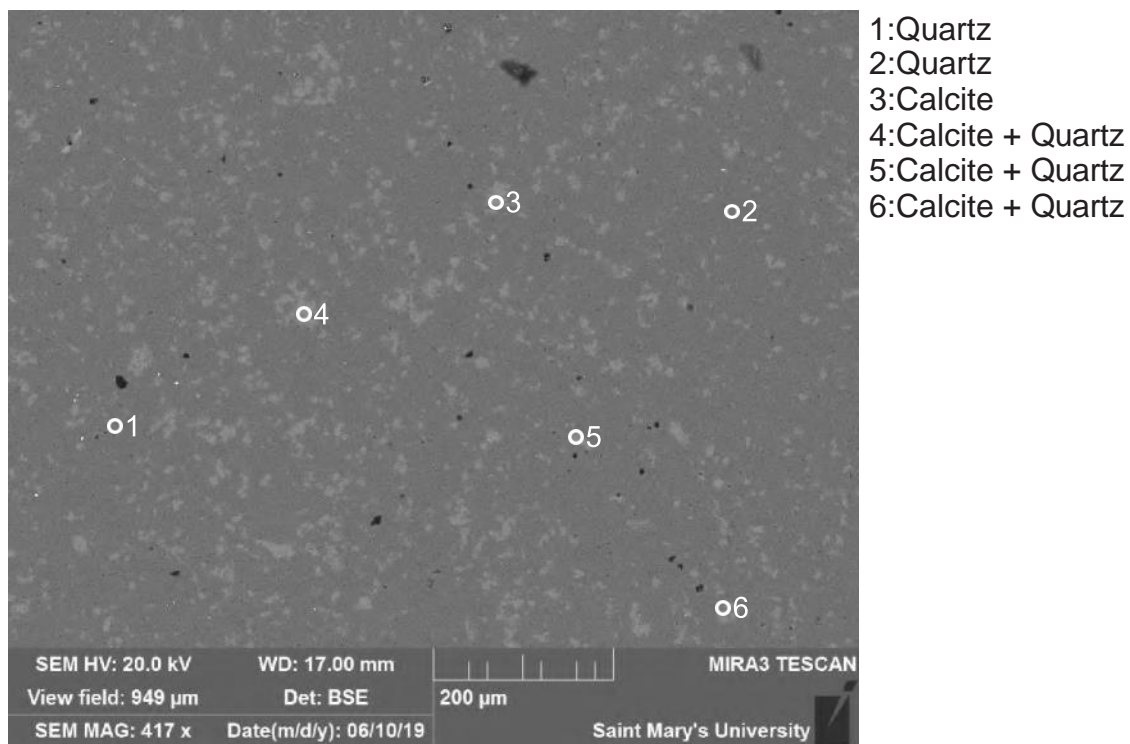

Figure S4.4: AX2 (SEM) Site 3 (Table S4.1). Calcite and quartz mixture.

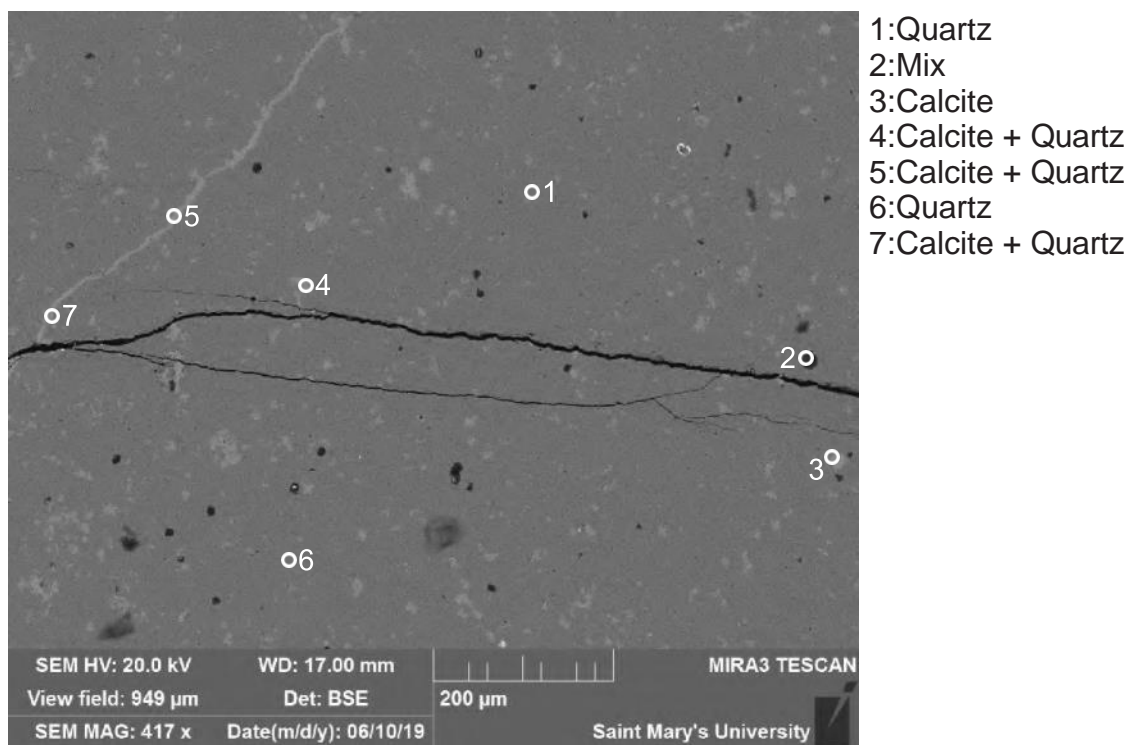

Figure S4.5: AX2 (SEM) Site 4 (Table S4.1). Blebs of calcite in quartz (4,6) cut by calcite veinlet (5,7) and an open fracture.

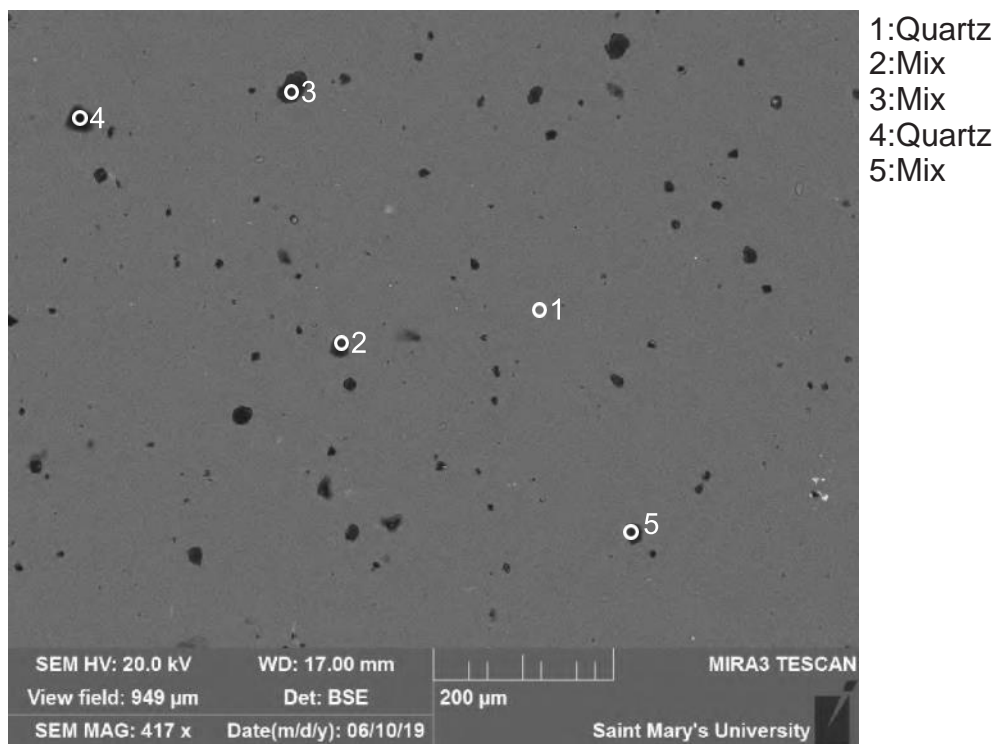

Figure S4.6: AX2 (SEM) Site 5 (Table S4.1). Quartz and high porosity.

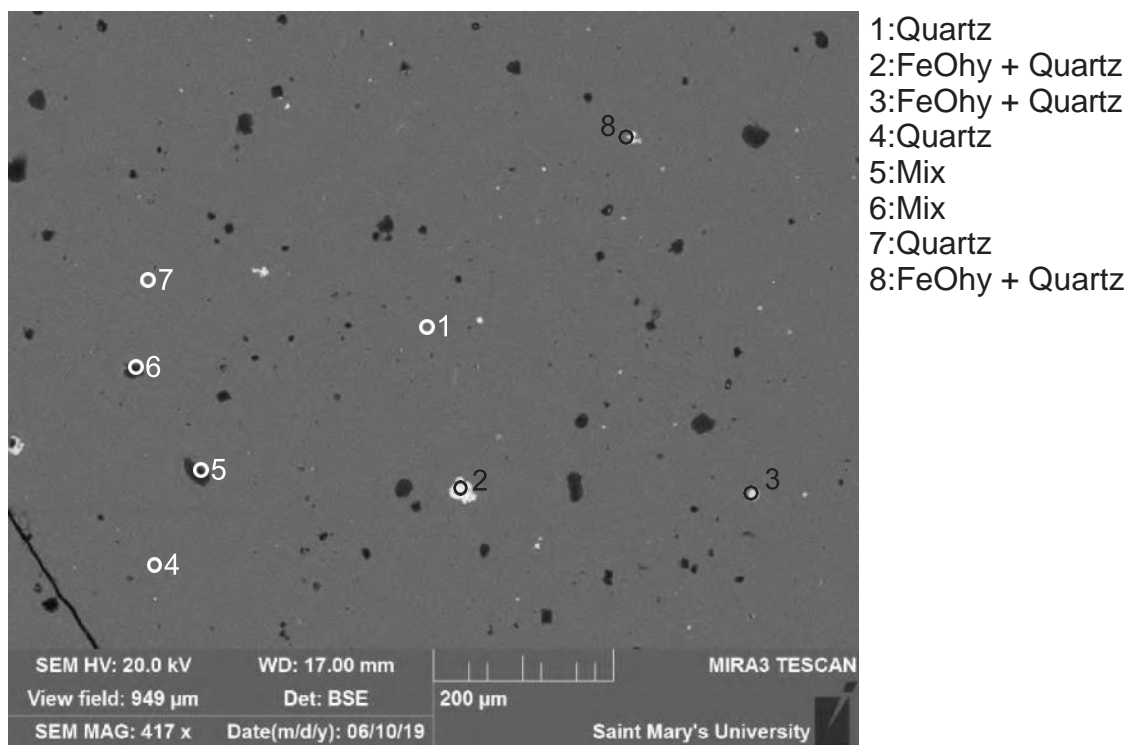

Figure S4.7: AX2 (SEM) Site 6 (Table S4.1). Similar to Fig. 6.

Table S4.1: Scanning Electron Microscope (SEM) mineral chemical analyses (EDS) of AX2.

| Site | Position | Mineral  | SiO2   | TiO2 | Al2O3 | FeO   | MnO  | MgO  | CaO   | Na2O | K2O  | P2O5 | SO3   | Cl   | NiO  | ZnO | Total | Actual Total |
|------|----------|----------|--------|------|-------|-------|------|------|-------|------|------|------|-------|------|------|-----|-------|--------------|
| 1    | 1        | Cal + Qz | 13.95  |      |       |       |      | 0.64 | 85.41 |      |      |      |       |      |      |     | 100   | 67           |
| 1    | 2        | Cal + Qz | 42.03  |      |       |       |      |      | 57.97 |      |      |      |       |      |      |     | 100   | 80           |
| 1    | 3        | Py       | 1.10   |      |       | 29.32 | 1.02 |      | 0.66  |      |      |      | 67.89 |      |      |     | 100   | 213          |
| 1    | 4        | Qz + Cal | 86.50  |      |       | 0.36  |      |      | 13.14 |      |      |      |       |      |      |     | 100   | 108          |
| 1    | 5        | Cal + Qz | 21.28  |      |       |       |      | 0.76 | 77.97 |      |      |      |       |      |      |     | 100   | 70           |
| 1    | 6        | Cal + Qz | 38.69  |      |       |       |      | 0.51 | 60.80 |      |      |      |       |      |      |     | 100   | 80           |
| 2    | 1        | Qz       | 99.39  |      | 0.61  |       |      |      |       |      |      |      |       |      |      |     | 100   | 119          |
| 2    | 2        | Cal + Qz | 12.37  |      |       |       |      |      | 87.63 |      |      |      |       |      |      |     | 100   | 62           |
| 2    | 3        | Qz       | 98.98  |      | 1.02  |       |      |      |       |      |      |      |       |      |      |     | 100   | 119          |
| 2    | 4        | Py       | 8.25   |      |       | 37.09 | 0.39 |      | 0.65  |      |      |      | 53.62 |      |      |     | 100   | 161          |
| 2    | 5        | Cal      | 0.53   |      |       |       |      | 0.78 | 54.69 |      |      |      |       |      |      |     | 56    | 59           |
| 2    | 6        | Cal + Qz | 31.21  |      |       |       |      | 0.74 | 68.05 |      |      |      |       |      |      |     | 100   | 69           |
| 2    | 7        | Py       | 0.49   |      |       | 27.72 | 0.39 |      |       | 0.45 |      |      | 70.95 |      |      |     | 100   | 240          |
| 2    | 8        | Py + Ni  | 0.66   |      |       | 28.40 |      |      | 0.90  |      |      |      | 69.68 |      | 0.36 |     | 100   | 218          |
| 2    | 9        | Qz       | 100.00 |      |       |       |      |      |       |      |      |      |       |      |      |     | 100   | 117          |
| 3    | 1        | Qz       | 99.48  |      | 0.52  |       |      |      |       |      |      |      |       |      |      |     | 100   | 114          |
| 3    | 2        | Qz       | 95.40  |      |       |       |      |      | 4.60  |      |      |      |       |      |      |     | 100   | 116          |
| 3    | 3        | Cal      | 1.16   |      |       |       |      | 0.67 | 54.17 |      |      |      |       |      |      |     | 56    | 57           |
| 3    | 4        | Cal + Qz | 24.37  |      |       |       |      | 0.62 | 75.01 |      |      |      |       |      |      |     | 100   | 66           |
| 3    | 5        | Cal + Qz | 38.48  |      |       |       |      |      | 61.52 |      |      |      |       |      |      |     | 100   | 75           |
| 3    | 6        | Cal + Qz | 20.60  |      |       | 1.03  |      | 1.08 | 75.78 |      |      |      | 1.51  |      |      |     | 100   | 70           |
| 4    | 1        | Qz       | 98.49  |      | 1.13  |       |      |      |       |      | 0.37 |      |       |      |      |     | 100   | 112          |
| 4    | 2        | Mix      | 63.63  |      | 7.12  | 3.31  |      | 3.40 | 16.78 | 3.27 | 1.23 |      |       | 1.27 |      |     | 100   | 24           |
| 4    | 3        | Cal      | 1.32   |      |       |       |      |      | 54.68 |      |      |      |       |      |      |     | 56    | 59           |
| 4    | 4        | Cal + Qz | 48.48  |      |       | 0.78  |      |      | 50.75 |      |      |      |       |      |      |     | 100   | 76           |
| 4    | 5        | Cal + Qz | 14.30  |      |       |       |      |      | 85.70 |      |      |      |       |      |      |     | 100   | 58           |
| 4    | 6        | Qz       | 98.89  |      |       |       |      |      | 1.11  |      |      |      |       |      |      |     | 100   | 112          |
| 4    | 7        | Cal + Qz | 16.94  |      |       |       |      | 1.02 | 82.04 |      |      |      |       |      |      |     | 100   | 60           |
| 5    | 1        | Qz       | 100.00 |      |       |       |      |      |       |      |      |      |       |      |      |     | 100   | 113          |
| 5    | 2        | Mix      | 55.56  |      | 9.35  | 13.16 |      | 3.81 | 14.93 | 1.26 | 1.14 |      |       | 0.79 |      |     | 100   | 43           |
| 5    | 3        | Mix      | 67.42  |      | 8.77  | 4.76  |      | 4.88 | 8.12  | 1.96 | 1.52 |      | 1.69  | 0.89 |      |     | 100   | 34           |
| 5    | 4        | Qz       | 97.39  |      |       |       |      |      | 0.40  |      |      |      | 1.84  | 0.38 |      |     | 100   | 71           |
| 5    | 5        | Mix      | 68.40  | 0.83 | 5.35  | 3.83  |      | 2.50 | 15.28 | 1.80 | 1.00 |      |       | 1.00 |      |     | 100   | 36           |
| 6    | 1        | Qz       | 100.00 |      |       |       |      |      |       |      |      |      |       |      |      |     | 100   | 107          |

Table S4.1: Scanning Electron Microscope (SEM) mineral chemical analyses (EDS) of AX2.

| Site | Position | Mineral    | SiO2   | TiO2 | Al2O3 | FeO   | MnO | MgO  | CaO   | Na2O | K2O  | P2O5  | SO3  | Cl   | NiO | ZnO  | Total | Actual Total |
|------|----------|------------|--------|------|-------|-------|-----|------|-------|------|------|-------|------|------|-----|------|-------|--------------|
| 6    | 2        | FeOhy + Qz | 10.22  |      | 1.02  | 85.89 |     |      | 0.98  |      |      | 1.55  |      | 0.35 |     |      | 100   | 72           |
| 6    | 3        | FeOhy + Qz | 15.57  |      | 1.05  | 81.28 |     |      | 0.93  |      |      | 0.85  |      | 0.31 |     |      | 100   | 75           |
| 6    | 4        | Qz         | 100.00 |      |       |       |     |      |       |      |      |       |      |      |     |      | 100   | 108          |
| 6    | 5        | Mix        | 61.27  |      | 6.97  | 4.48  |     | 3.41 | 17.90 | 2.14 | 0.91 |       | 2.18 | 0.75 |     |      | 100   | 25           |
| 6    | 6        | Mix        | 40.27  |      | 5.31  | 3.40  |     | 2.08 | 25.69 | 2.01 | 0.86 | 18.14 | 1.72 | 0.53 |     |      | 100   | 30           |
| 6    | 7        | Qz         | 100.00 |      |       |       |     |      |       |      |      |       |      |      |     |      | 100   | 106          |
| 6    | 8        | FeOhy + Qz | 30.71  |      | 0.80  | 65.89 |     |      | 0.63  |      |      | 0.85  |      | 0.34 |     | 0.78 | 100   | 77           |



Supplementary Material S5: SEM-BSE images and Electron Dispersive Spectroscopy (EDS) mineral analyses for sample AX3.

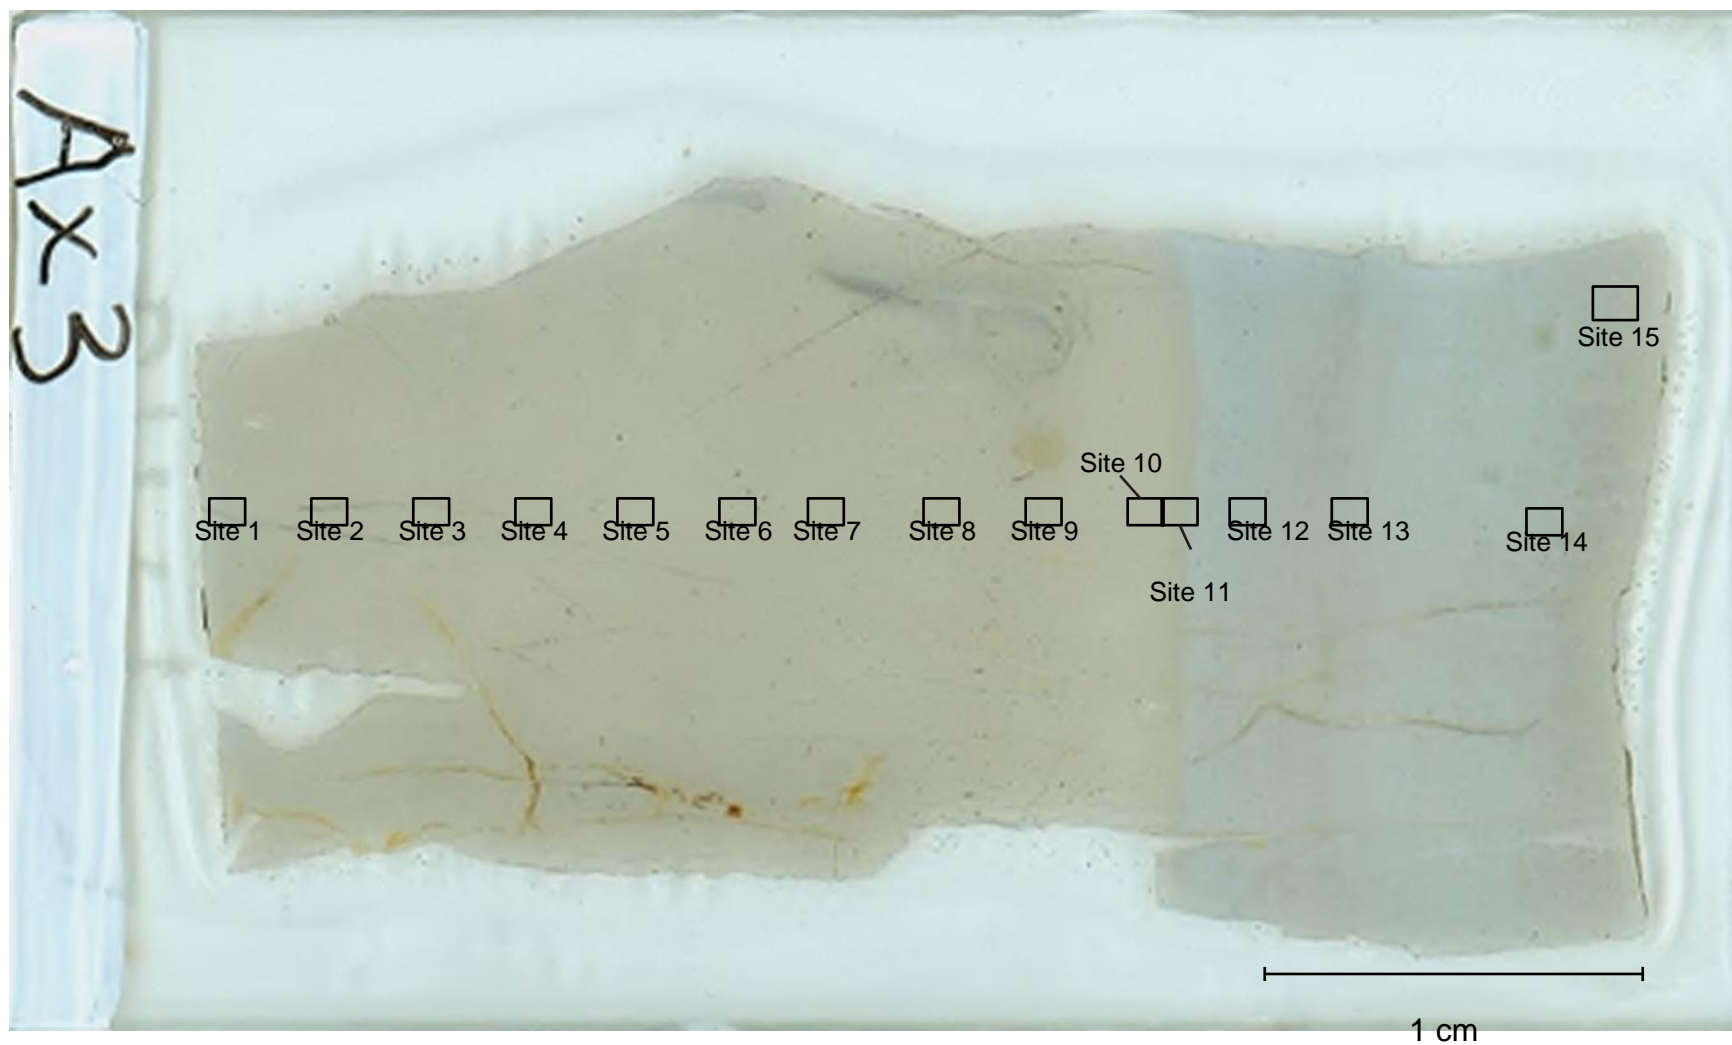

Figure S5.1: AX3 thin section showing respective sites taken for mineral chemical analyses (EDS) via Scanning Electron Microscope (SEM).

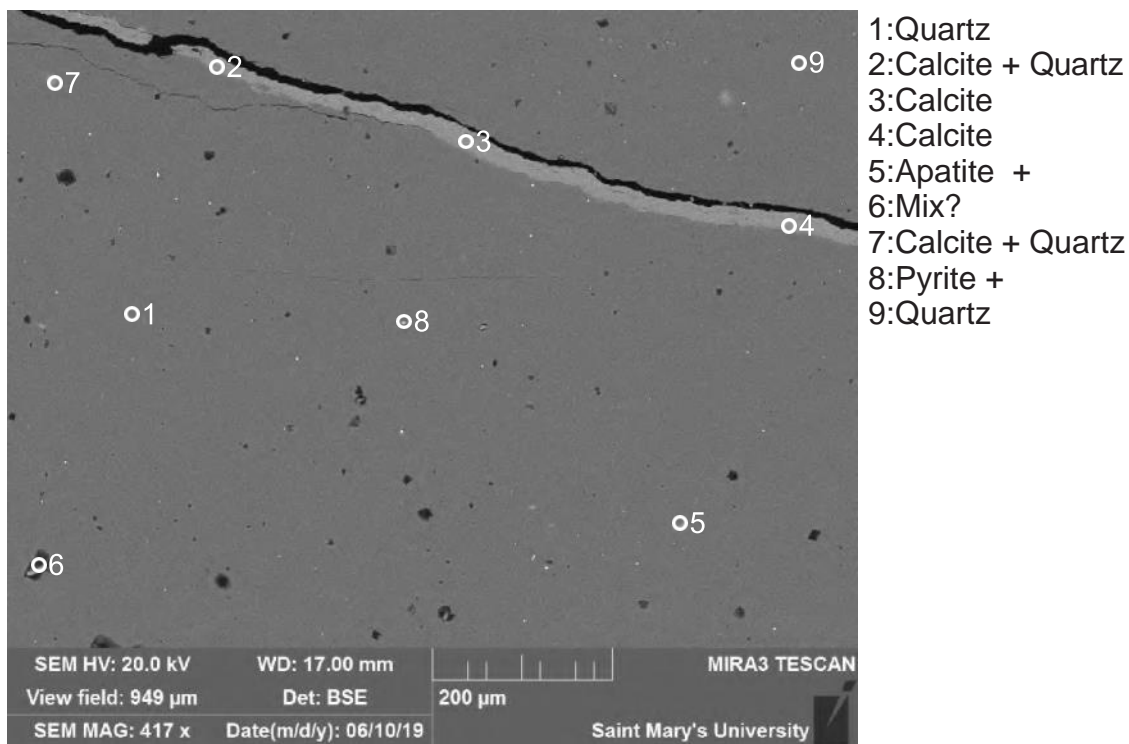

Figure S5.2: AX3 (SEM) Site 1 (Table S5.1). Blebs of apatite (5), and pyrite (8) in quartz, all cut by calcite vein (2-4). Some porosity.

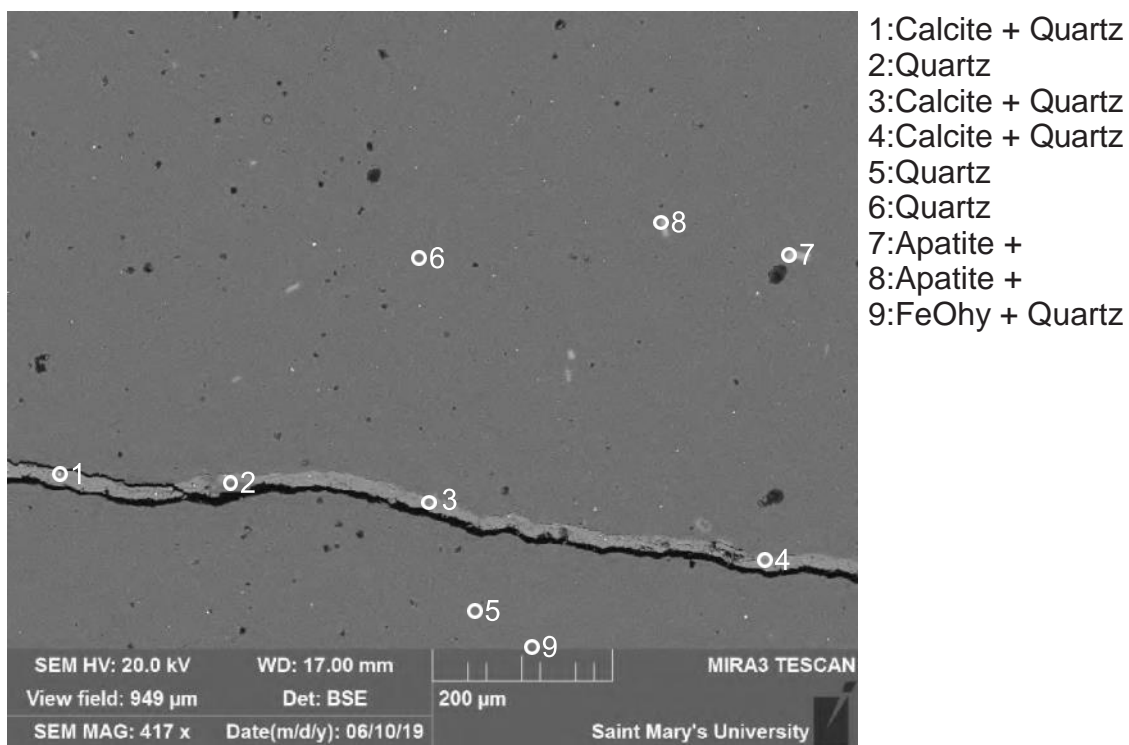

Figure S5.3: AX3 (SEM) Site 2 (Table S5.1). Similar to Fig. 2. Some porosity.

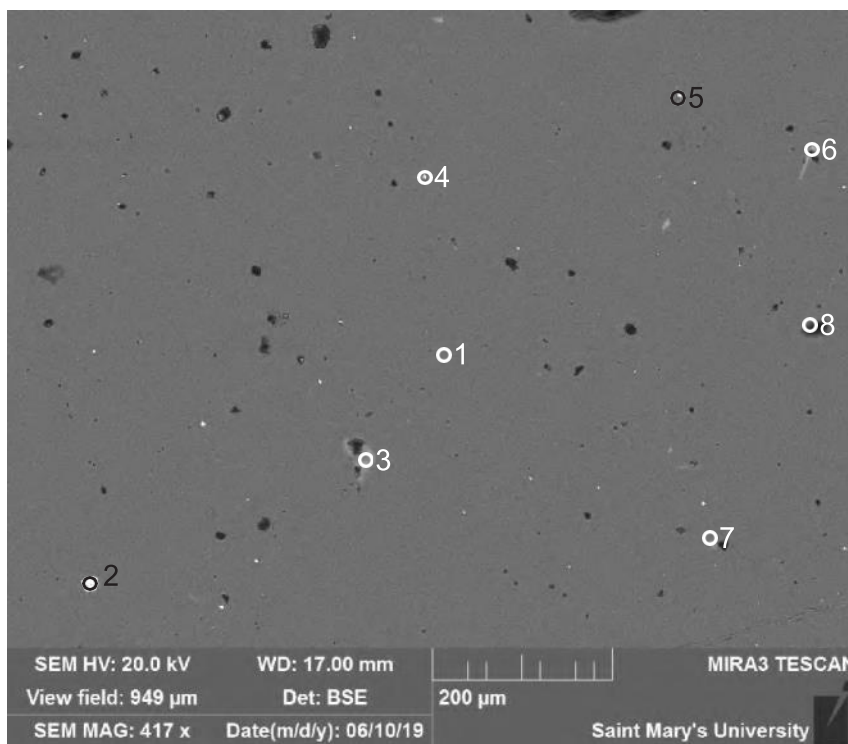

- 1:Quartz
- 2:Pyrite
- 3:Apatite +
- 4:Pyrite +
- 5:Pyrite +
- 6:Apatite +
- 7:Apatite +
- 8:Quartz

Figure S5.4: AX3 (SEM) Site 3 (Table S5.1). Blebs of apatite (3,6,7) associated with voids (3,6), pyrite also associated with void (5) all in quartz. Good porosity.

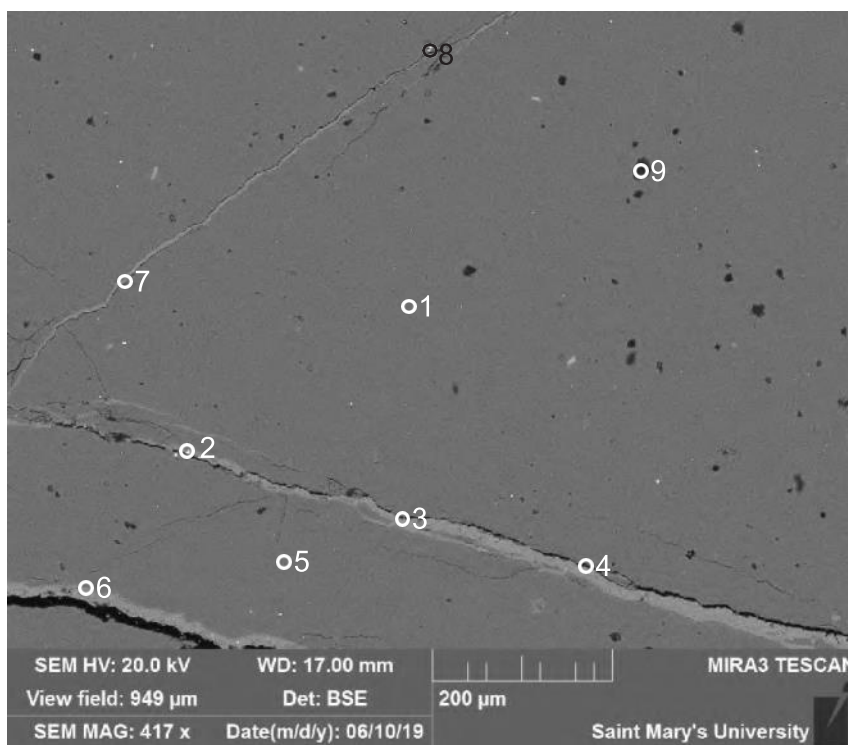

- 1:Quartz
- 2:Pyrite +
- 3:Calcite +
- 4:Calcite
- 5:Quartz
- 6:Calcite + Quartz
- 7:Calcite + Quartz
- 8:Pyrite + Quartz
- 9:Hole

Figure S5.5: AX3 (SEM) Site 4 (Table S5.1). Three calcite veins cutting quartz. Pyrite blebs appear to be associated with the calcite veins (2,8). Inhomogeneous distribution of porosity.

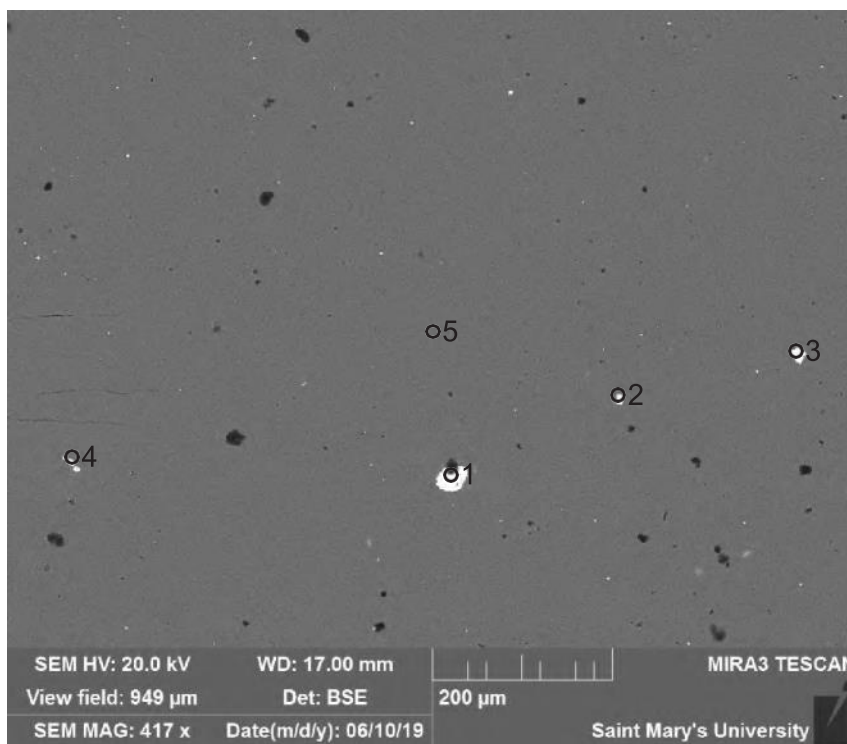

- 1:Pyrite + Cobalt + Nickel +
- 2:Pyrite +
- 3:Pyrite + Cobalt + Nickel +
- 4:Pyrrhotite + Quartz
- 5:Quartz

Figure S5.6: AX3 (SEM) Site 5 (Table S5.1). Scattered blebs of pyrite (1-3) and pyrrhotite (4) in quartz (5). Two pyrite analyses (1,3) contain significant (up to 4%) NiO.

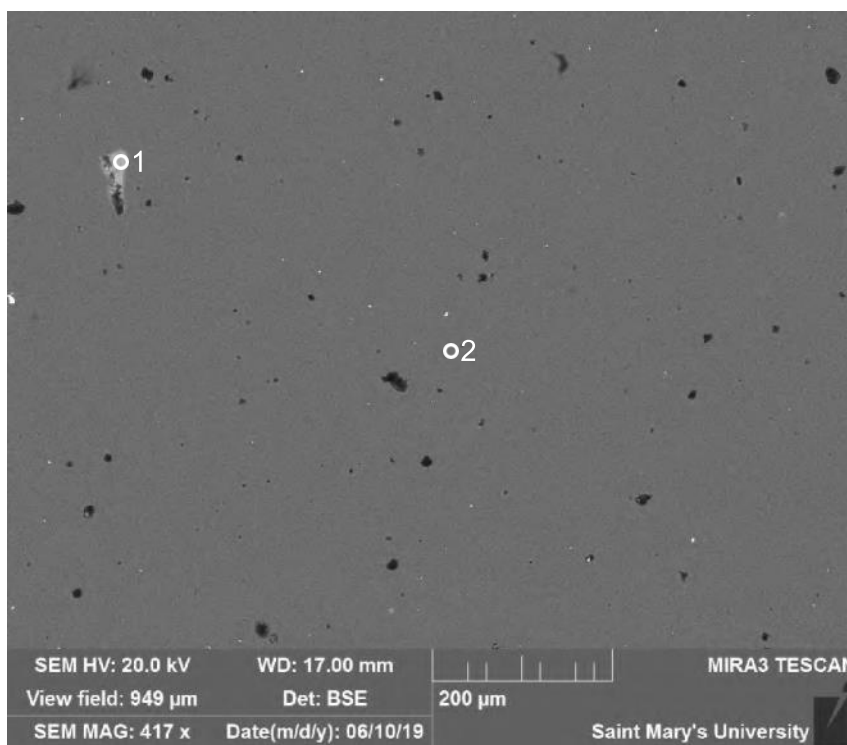

- 1:Apatite +
- 2:Quartz

Figure S5.7: AX3 (SEM) Site 6 (Table S5.1). Apatite (1) filling a void in quartz (2).



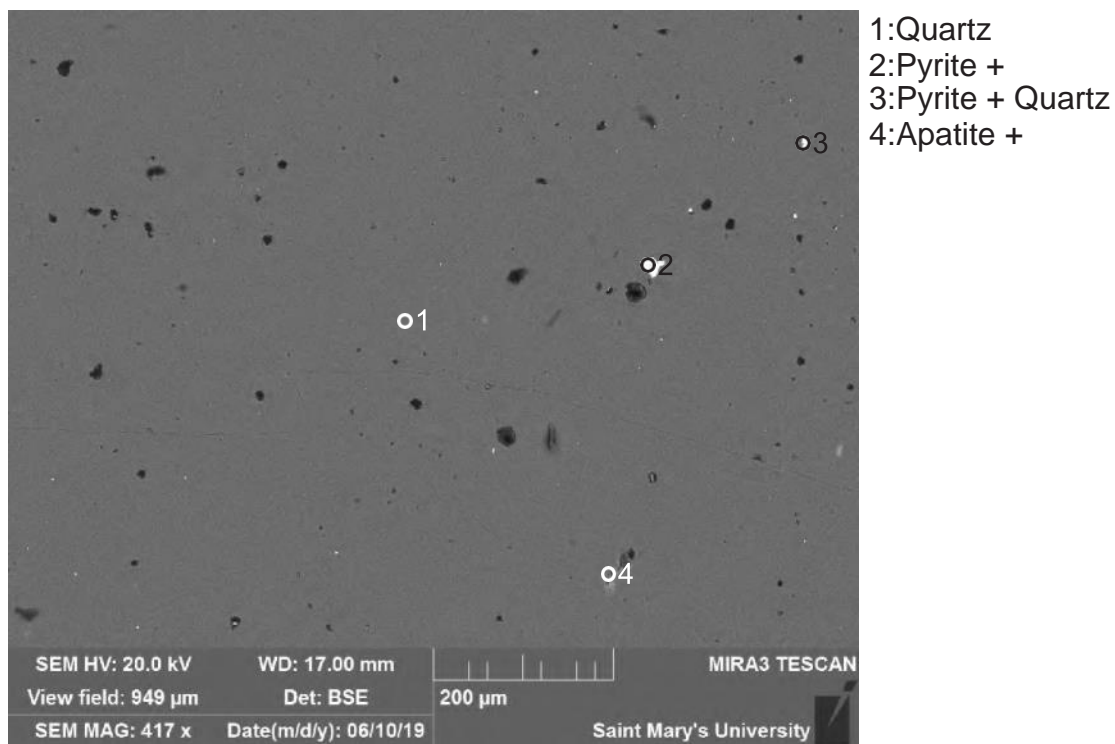

Figure S5.8: AX3 (SEM) Site 7 (Table S5.1). Similar to Fig. 4.

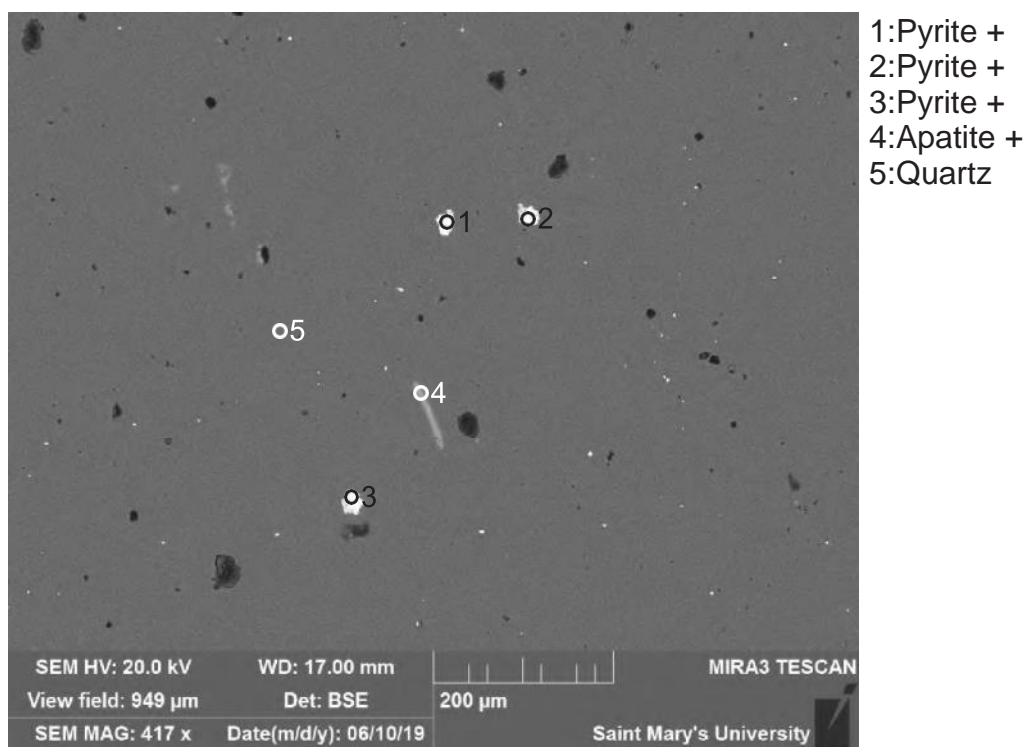

Figure S5.9: AX3 (SEM) Site 8 (Table S5.1). Similar to Fig. 4.



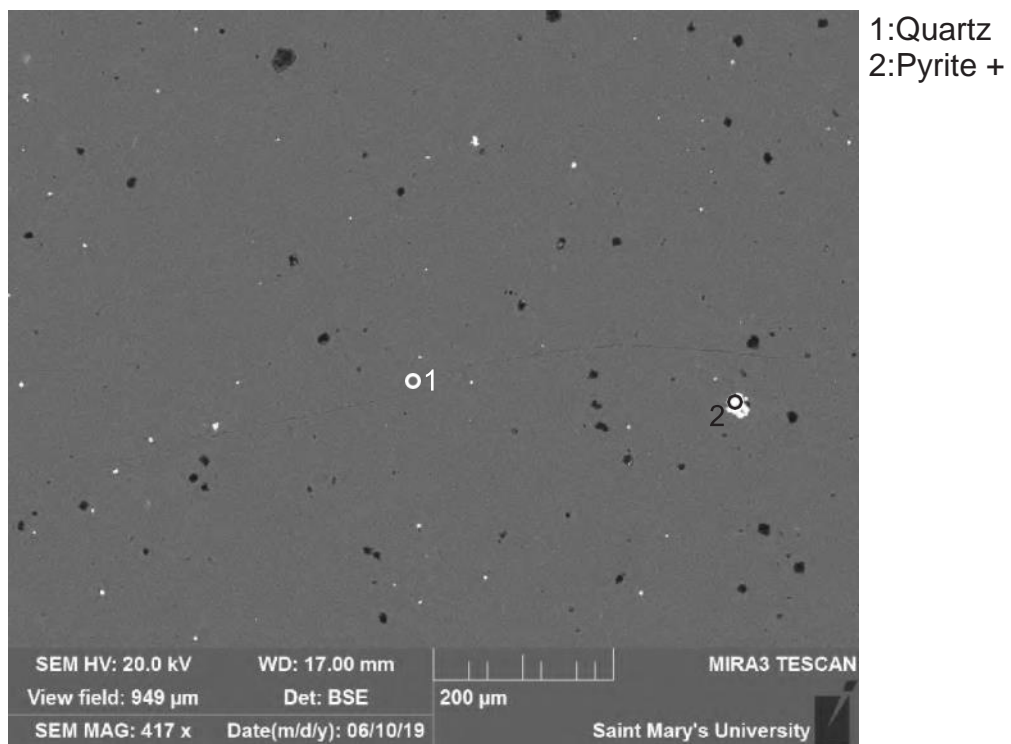

Figure S5.10: AX3 (SEM) Site 9 (Table S5.1). Pyrite (2) bleb in quartz (1).

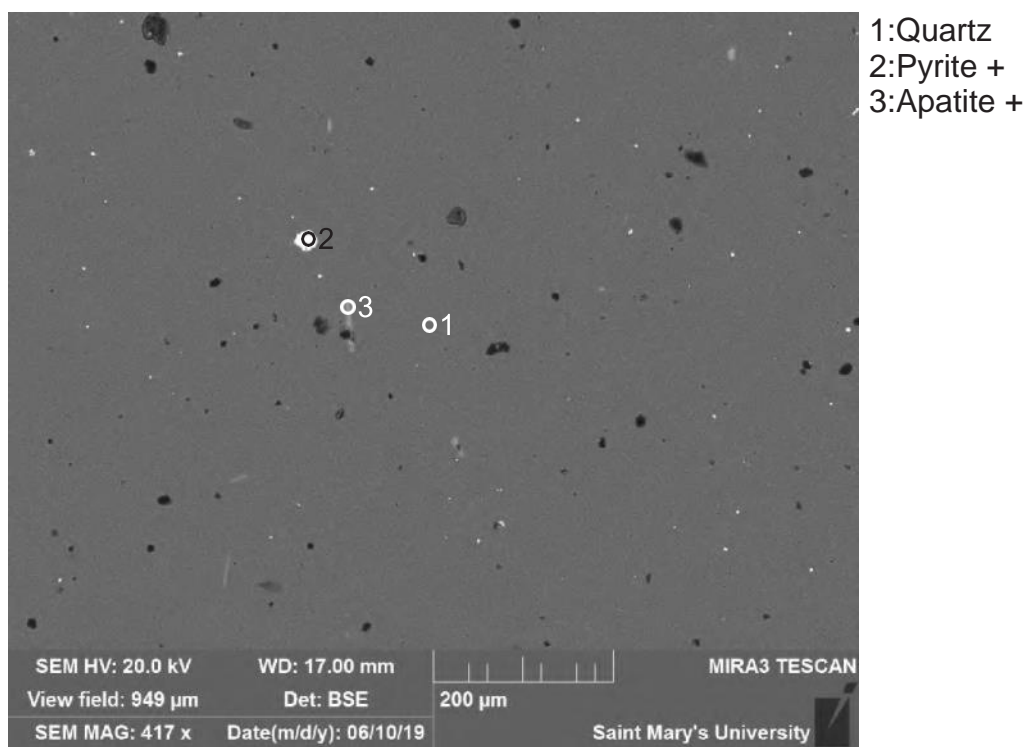

Figure S5.11: AX3 (SEM) Site 10 (Table S5.1). Similar to Fig. 4.

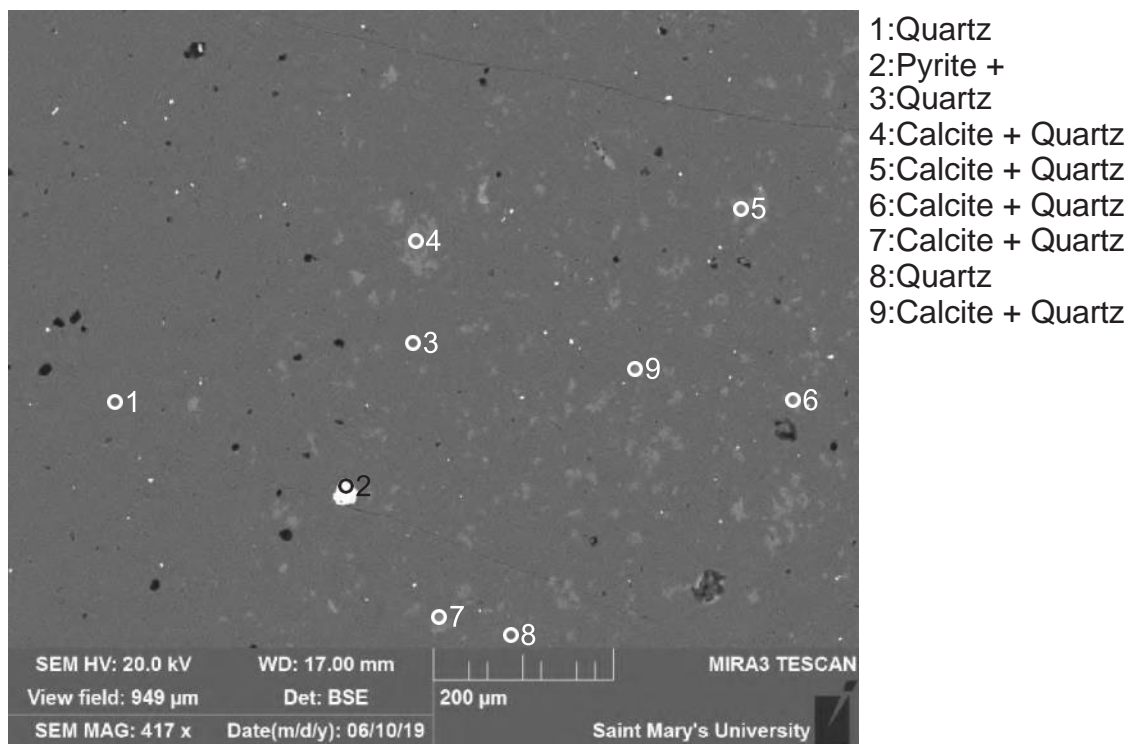

Figure S5.12: AX3 (SEM) Site 11 (Table S5.1). Mixture of quartz and calcite (4-7,9) with a pyrite (2) bleb.

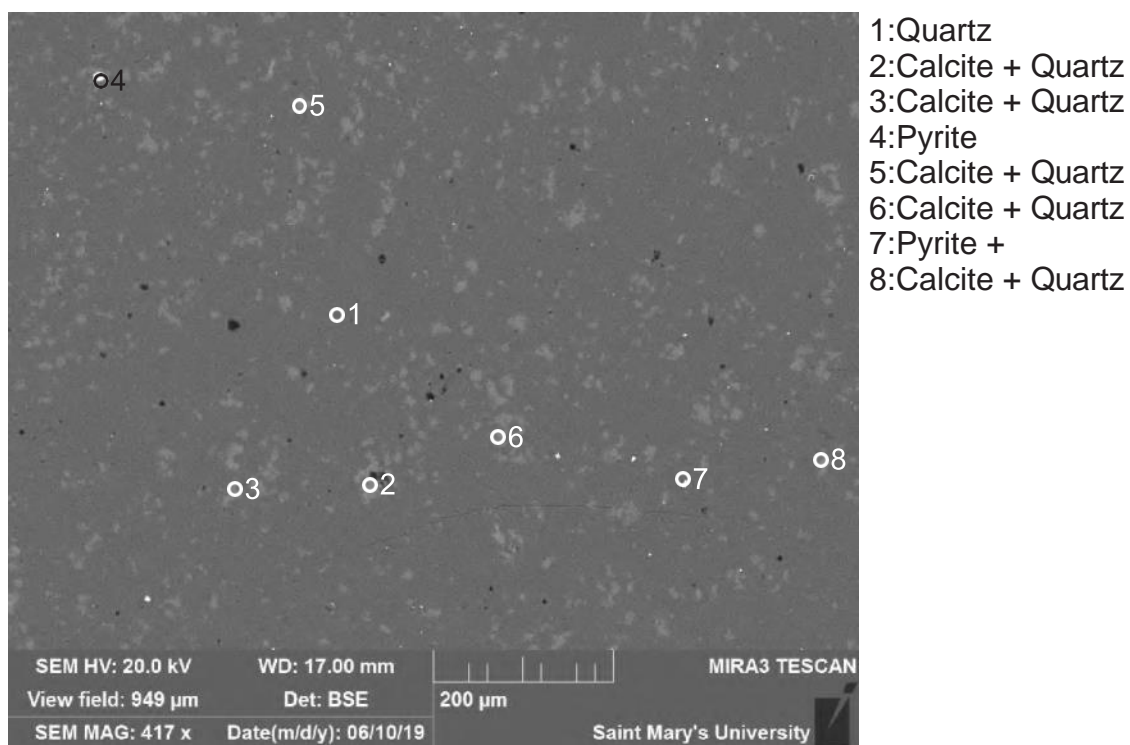

Figure S5.13: AX3 (SEM) Site 12 (Table S5.1). Similar to Fig. 12.

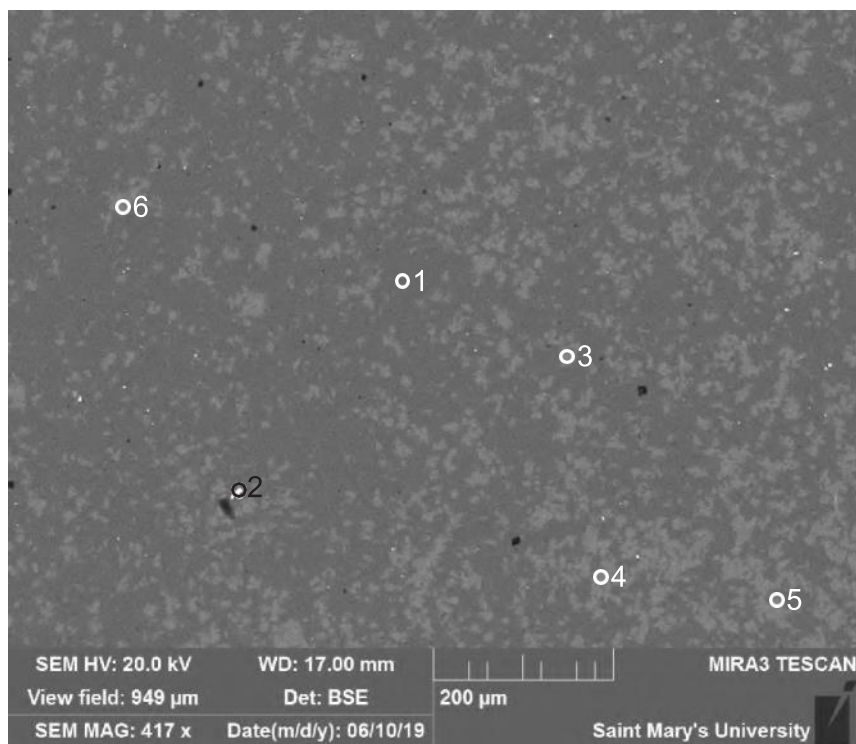

- 1:Quartz
- 2:Zinc oxide + Quartz
- 3:Calcite + Quartz
- 4:Quartz + Calcite
- 5:Calcite + Quartz
- 6:Calcite + Quartz

Figure S5.14: AX3 (SEM) Site 13 (Table S5.1). Mixture of quartz and calcite (3-6) with ZnO in void (2).

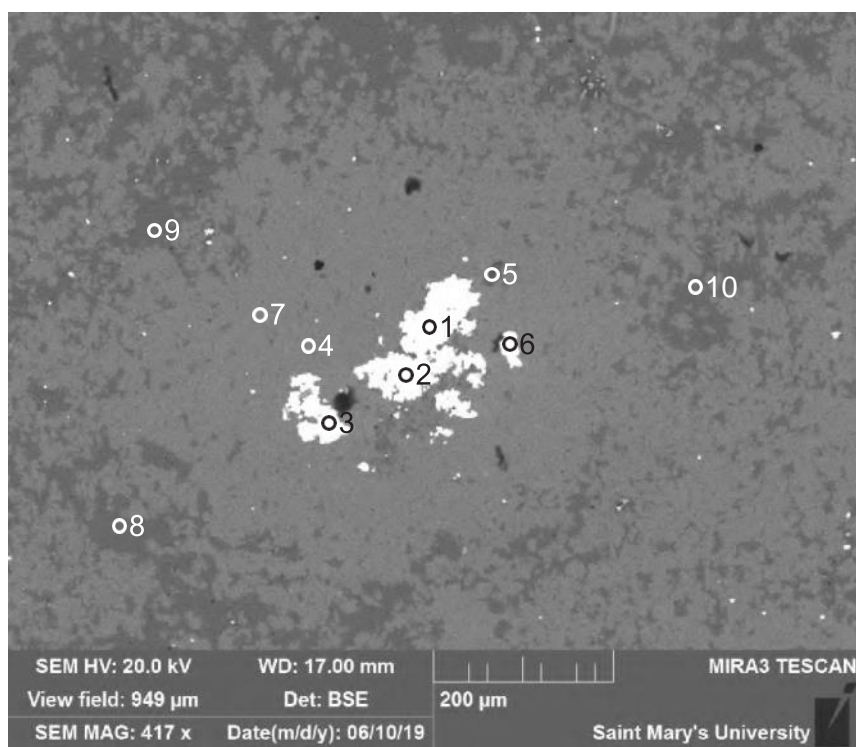

- 1:Barite
- 2:Barite
- 3:Barite
- 4:Calcite + Quartz
- 5:Calcite + Quartz
- 6:Barite
- 7:Calcite + Quartz
- 8:Quartz
- 9:Quartz
- 10:Quartz

Figure S5.15: AX3 (SEM) Site 14 (Table S5.1). Barite (1-3,6) crystal aggregate in an almost homogeneous large area of calcite (4,7).

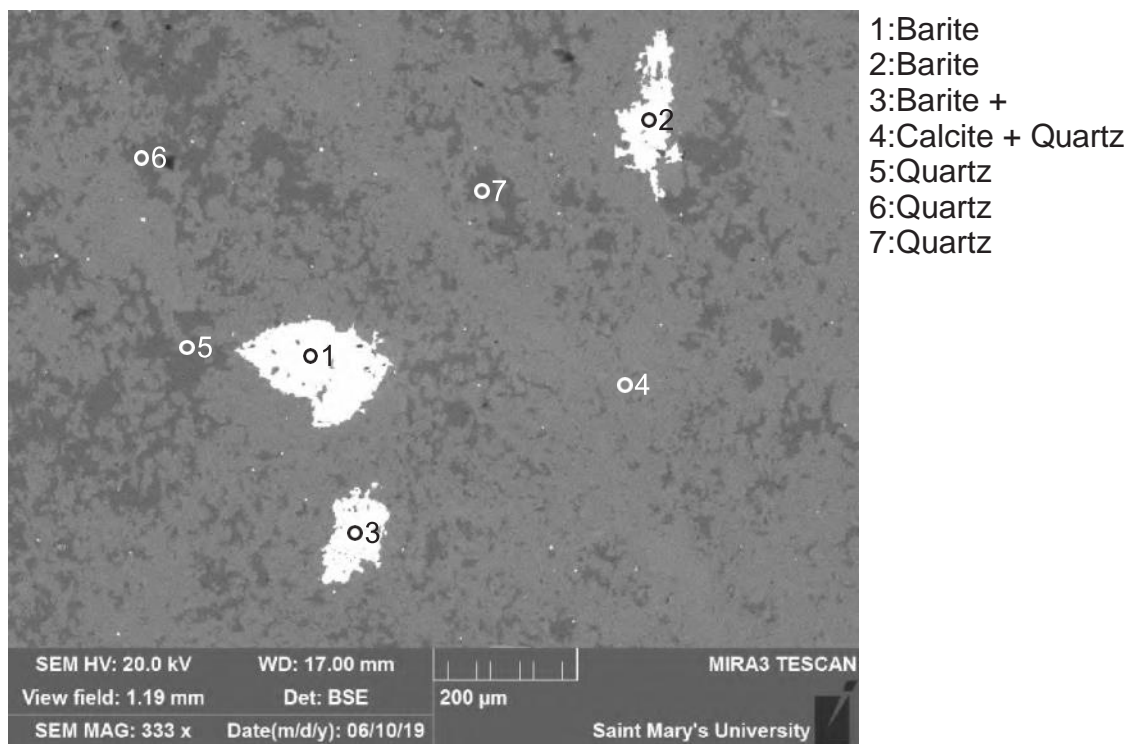

Figure S5.16: AX3 (SEM) Site 15 (Table S5.1). Similar to Fig.15.

Table S5.1: Scanning Electron Microscope (SEM) mineral chemical analyses (EDS) of AX3.

| Site | Position | Mineral        | SiO2   | TiO2 | Al2O3 | FeO   | MnO  | MgO   | CaO   | Na2O | K2O  | P2O5  | SO3   | F    | Cl   | CoO  | NiO  | CuO  | ZnO   | As2O3 | ZrO2 | BaO | WO3  | PtO2 | Total | Actual Total |
|------|----------|----------------|--------|------|-------|-------|------|-------|-------|------|------|-------|-------|------|------|------|------|------|-------|-------|------|-----|------|------|-------|--------------|
| 1    | 1        | Qz             | 100.00 |      |       |       |      |       |       |      |      |       |       |      |      |      |      |      |       |       |      |     |      |      | 100   | 116          |
| 1    | 2        | Cal + Qz       | 19.42  | 2.51 | 3.43  | 0.81  |      | 0.91  | 72.09 |      | 0.82 |       |       |      |      |      |      |      |       |       |      |     |      |      | 100   | 66           |
| 1    | 3        | Cal            | 0.82   |      |       |       |      | 0.65  | 54.53 |      |      |       |       |      |      |      |      |      |       |       |      |     |      |      | 100   | 57           |
| 1    | 4        | Cal            | 0.99   |      |       |       |      | 0.60  | 54.41 |      |      |       |       |      |      |      |      |      |       |       |      |     |      |      | 100   | 59           |
| 1    | 5        | Ap +           | 27.58  |      |       |       |      |       | 36.47 | 0.84 |      | 27.98 | 2.26  | 4.62 | 0.24 |      |      |      |       |       |      |     |      |      | 100   | 111          |
| 1    | 6        | Mix?           | 49.37  | 0.54 | 12.65 | 13.44 | 0.37 | 10.82 | 10.47 | 1.89 | 0.45 |       |       |      |      |      |      |      |       |       |      |     |      |      | 100   | 117          |
| 1    | 7        | Cal + Qz       | 3.90   |      |       |       |      |       | 96.10 |      |      |       |       |      |      |      |      |      |       |       |      |     |      |      | 100   | 55           |
| 1    | 8        | Py +           | 18.60  |      |       | 28.87 |      |       | 0.22  |      |      |       | 51.99 |      |      |      |      | 0.32 |       |       |      |     |      |      | 100   | 186          |
| 1    | 9        | Qz             | 100.00 |      |       |       |      |       |       |      |      |       |       |      |      |      |      |      |       |       |      |     |      |      | 100   | 118          |
| 2    | 1        | Cal + Qz       | 3.47   |      |       |       |      | 2.60  | 93.92 |      |      |       |       |      |      |      |      |      |       |       |      |     |      |      | 100   | 56           |
| 2    | 2        | Qz             | 100.00 |      |       |       |      |       |       |      |      |       |       |      |      |      |      |      |       |       |      |     |      |      | 100   | 118          |
| 2    | 3        | Cal + Qz       | 2.63   |      |       |       |      | 1.39  | 95.98 |      |      |       |       |      |      |      |      |      |       |       |      |     |      |      | 100   | 58           |
| 2    | 4        | Cal + Qz       | 2.79   |      |       |       |      | 3.07  | 94.14 |      |      |       |       |      |      |      |      |      |       |       |      |     |      |      | 100   | 61           |
| 2    | 5        | Qz             | 100.00 |      |       |       |      |       |       |      |      |       |       |      |      |      |      |      |       |       |      |     |      |      | 100   | 121          |
| 2    | 6        | Qz             | 100.00 |      |       |       |      |       |       |      |      |       |       |      |      |      |      |      |       |       |      |     |      |      | 100   | 117          |
| 2    | 7        | Ap +           | 1.07   |      |       |       |      |       | 47.80 | 1.11 |      | 38.73 | 2.41  | 7.12 | 0.38 |      |      |      |       |       |      |     | 1.38 |      | 100   | 109          |
| 2    | 8        | Ap +           | 7.29   |      |       |       |      |       | 46.29 | 1.08 |      | 36.79 | 2.46  | 5.71 | 0.39 |      |      |      |       |       |      |     |      |      | 100   | 108          |
| 2    | 9        | FeOhy + Qz     | 25.40  |      |       | 72.07 | 0.87 |       | 0.74  |      |      |       |       |      | 0.31 |      |      | 0.60 |       |       |      |     |      |      | 100   | 96           |
| 3    | 1        | Qz             | 100.00 |      |       |       |      |       |       |      |      |       |       |      |      |      |      |      |       |       |      |     |      |      | 100   | 117          |
| 3    | 2        | Py             | 0.53   |      |       | 26.99 | 0.81 |       |       | 0.30 |      |       | 71.02 |      |      |      | 0.34 |      |       |       |      |     |      |      | 100   | 218          |
| 3    | 3        | Ap +           | 44.12  |      |       |       |      |       | 28.45 | 0.57 |      | 23.17 | 0.90  | 2.78 |      |      |      |      |       |       |      |     |      |      | 100   | 108          |
| 3    | 4        | Py +           | 13.90  |      |       | 30.15 |      |       |       |      |      |       | 55.95 |      |      |      |      |      |       |       |      |     |      |      | 100   | 179          |
| 3    | 5        | Py +           | 5.90   |      |       | 51.12 |      |       | 0.55  | 0.44 |      |       | 41.98 |      |      |      |      |      |       |       |      |     |      |      | 100   | 132          |
| 3    | 6        | Ap +           | 19.89  |      |       |       |      |       | 38.98 | 1.08 |      | 32.39 | 2.34  | 5.03 | 0.28 |      |      |      |       |       |      |     |      |      | 100   | 112          |
| 3    | 7        | Ap +           | 20.05  |      |       |       |      |       | 39.60 | 0.89 |      | 32.35 | 2.25  | 4.64 | 0.24 |      |      |      |       |       |      |     |      |      | 100   | 123          |
| 3    | 8        | Qz             | 96.56  |      |       |       |      |       | 0.28  | 0.63 | 0.37 |       | 1.53  |      | 0.63 |      |      |      |       |       |      |     |      |      | 100   | 79           |
| 4    | 1        | Qz             | 100.00 |      |       |       |      |       |       |      |      |       |       |      |      |      |      |      |       |       |      |     |      |      | 100   | 115          |
| 4    | 2        | Py +           | 8.09   | 0.99 | 0.89  | 33.96 | 0.54 |       | 13.41 |      | 0.24 |       | 40.99 |      |      |      | 0.89 |      |       |       |      |     |      |      | 100   | 119          |
| 4    | 3        | Cal +          | 15.67  |      | 3.77  | 0.88  |      | 1.67  | 76.73 |      | 1.28 |       |       |      |      |      |      |      |       |       |      |     |      |      | 100   | 65           |
| 4    | 4        | Cal            | 0.91   |      |       |       |      | 0.69  | 54.40 |      |      |       |       |      |      |      |      |      |       |       |      |     |      |      | 100   | 58           |
| 4    | 5        | Qz             | 100.00 |      |       |       |      |       |       |      |      |       |       |      |      |      |      |      |       |       |      |     |      |      | 100   | 115          |
| 4    | 6        | Cal + Qz       | 3.22   |      |       |       |      | 0.76  | 96.02 |      |      |       |       |      |      |      |      |      |       |       |      |     |      |      | 100   | 54           |
| 4    | 7        | Cal + Qz       | 5.34   |      |       |       |      | 0.95  | 93.71 |      |      |       |       |      |      |      |      |      |       |       |      |     |      |      | 100   | 56           |
| 4    | 8        | Py + Qz        | 23.92  |      |       | 24.15 | 0.47 |       | 0.35  |      |      |       | 48.99 |      |      |      | 0.34 | 0.64 |       |       |      |     |      | 1.14 | 100   | 163          |
| 4    | 9        | Hole           | 42.07  |      | 8.01  | 6.76  |      | 5.40  | 8.07  |      |      |       | 15.53 |      | 1.69 |      |      |      | 12.48 |       |      |     |      |      | 100   | 18           |
| 5    | 1        | Py + Co + Ni + | 1.17   |      |       | 31.25 |      |       |       | 0.92 |      |       | 59.90 |      |      | 4.05 | 2.72 |      |       |       |      |     |      |      | 100   | 174          |
| 5    | 2        | Py +           | 1.58   |      |       | 36.38 |      |       |       | 0.56 |      |       | 60.70 |      |      |      |      |      | 0.78  |       |      |     |      |      | 100   | 183          |
| 5    | 3        | Py + Co + Ni + | 4.60   |      |       | 37.59 |      |       | 0.55  | 0.49 |      |       | 53.83 |      |      | 1.80 | 1.13 |      |       |       |      |     |      |      | 100   | 152          |
| 5    | 4        | Po + Qz        | 15.64  |      |       | 56.23 |      |       |       |      |      |       | 28.13 |      |      |      |      |      |       |       |      |     |      |      | 100   | 107          |
| 5    | 5        | Qz             | 100.00 |      |       |       |      |       |       |      |      |       |       |      |      |      |      |      |       |       |      |     |      |      | 100   | 114          |
| 6    | 1        | Ap +           | 0.97   |      | 0.97  | 2.84  |      |       | 43.53 | 1.34 |      | 41.09 | 2.24  | 5.43 | 0.24 |      |      |      |       |       |      |     | 1.35 |      | 100   | 101          |
| 6    | 2        | Qz             | 98.44  |      |       | 0.60  |      |       |       |      |      |       | 0.96  |      |      |      |      |      |       |       |      |     |      |      | 100   | 115          |
| 7    | 1        | Qz             | 100.00 |      |       |       |      |       |       |      |      |       |       |      |      |      |      |      |       |       |      |     |      |      | 100   | 113          |
| 7    | 2        | Py +           | 1.05   |      | 0.42  | 39.09 | 0.39 |       |       | 1.55 |      |       | 57.50 |      |      |      |      |      |       |       |      |     |      |      | 100   | 158          |
| 7    | 3        | Py + Qz        | 46.06  |      |       | 21.02 |      |       |       |      |      |       | 32.92 |      |      |      |      |      |       |       |      |     |      |      | 100   | 134          |
| 7    | 4        | Ap +           | 28.55  |      | 1.33  | 1.33  |      |       | 31.12 | 1.38 |      | 30.25 | 1.72  | 4.14 | 0.19 |      |      |      |       |       |      |     |      |      | 100   | 115          |
| 8    | 1        | Py +           | 1.32   |      |       | 28.83 | 0.34 |       | 0.27  | 0.50 | 0.23 |       | 68.52 |      |      |      |      |      |       |       |      |     |      |      | 100   | 198          |
| 8    | 2        | Py +           | 0.80   |      |       | 27.74 | 0.24 |       | 1.92  | 0.47 |      |       | 68.84 |      |      |      |      |      |       |       |      |     |      |      | 100   | 190          |
| 8    | 3        | Py +           | 0.81   |      |       | 29.97 |      |       | 0.59  | 0.49 | 0.26 |       | 67.88 |      |      |      |      |      |       |       |      |     |      |      | 100   | 197          |
| 8    | 4        | Ap +           | 2.90   |      | 3.14  | 2.69  |      |       | 40.65 | 1.22 |      | 41.95 | 2.33  | 5.13 |      |      |      |      |       |       |      |     |      |      | 100   | 106          |
| 8    | 5        | Qz             | 100.00 |      |       |       |      |       |       |      |      |       |       |      |      |      |      |      |       |       |      |     |      |      | 100   | 112          |

Table S5.1: Scanning Electron Microscope (SEM) mineral chemical analyses (EDS) of AX3.

| Site | Position | Mineral  | SiO2   | TiO2 | Al2O3 | FeO   | MnO  | MgO  | CaO   | Na2O | K2O  | P2O5  | SO3   | F    | Cl   | CoO   | NiO  | CuO | ZnO   | As2O3 | ZrO2 | BaO   | WO3 | PtO2 | Total | Actual Total |
|------|----------|----------|--------|------|-------|-------|------|------|-------|------|------|-------|-------|------|------|-------|------|-----|-------|-------|------|-------|-----|------|-------|--------------|
| 9    | 1        | Qz       | 99.40  |      |       | 0.60  |      |      |       |      |      |       |       |      |      |       |      |     |       |       |      |       |     |      | 100   | 111          |
| 9    | 2        | Py +     | 3.36   |      | 1.05  | 41.24 |      |      |       | 0.68 | 0.32 |       | 53.35 |      |      |       |      |     |       |       |      |       |     |      | 100   | 155          |
| 10   | 1        | Qz       | 100.00 |      |       |       |      |      |       |      |      |       |       |      |      |       |      |     |       |       |      |       |     |      | 100   | 111          |
| 10   | 2        | Py +     | 0.48   |      |       | 26.88 |      |      |       | 1.37 |      |       | 70.83 |      |      |       | 0.44 |     |       |       |      |       |     |      | 100   | 203          |
| 10   | 3        | Ap +     | 5.13   |      | 0.69  | 0.61  |      |      | 45.57 | 0.97 |      | 39.12 | 2.09  | 5.83 |      |       |      |     |       |       |      |       |     |      | 100   | 99           |
| 11   | 1        | Qz       | 100.00 |      |       |       |      |      |       |      |      |       |       |      |      |       |      |     |       |       |      |       |     |      | 100   | 106          |
| 11   | 2        | Py +     | 0.48   |      |       | 27.39 | 0.22 |      | 1.23  | 0.39 |      |       | 70.29 |      |      |       |      |     |       |       |      |       |     |      | 100   | 202          |
| 11   | 3        | Qz       | 100.00 |      |       |       |      |      |       |      |      |       |       |      |      |       |      |     |       |       |      |       |     |      | 100   | 110          |
| 11   | 4        | Cal + Qz | 40.36  |      |       |       |      | 1.18 | 58.46 |      |      |       |       |      |      |       |      |     |       |       |      |       |     |      | 100   | 69           |
| 11   | 5        | Cal + Qz | 11.77  |      |       |       |      |      | 88.23 |      |      |       |       |      |      |       |      |     |       |       |      |       |     |      | 100   | 57           |
| 11   | 6        | Cal + Qz | 39.83  |      | 0.66  | 0.49  |      | 0.67 | 58.34 |      |      |       |       |      |      |       |      |     |       |       |      |       |     |      | 100   | 71           |
| 11   | 7        | Cal + Qz | 11.05  |      |       |       |      |      | 88.95 |      |      |       |       |      |      |       |      |     |       |       |      |       |     |      | 100   | 58           |
| 11   | 8        | Qz       | 100.00 |      |       |       |      |      |       |      |      |       |       |      |      |       |      |     |       |       |      |       |     |      | 100   | 113          |
| 11   | 9        | Cal + Qz | 2.63   |      |       | 0.76  | 0.63 | 0.67 | 95.30 |      |      |       |       |      |      |       |      |     |       |       |      |       |     |      | 100   | 54           |
| 12   | 1        | Qz       | 99.39  |      | 0.61  |       |      |      |       |      |      |       |       |      |      |       |      |     |       |       |      |       |     |      | 100   | 109          |
| 12   | 2        | Cal + Qz | 20.58  |      | 2.97  | 0.74  |      | 4.44 | 70.47 |      | 0.79 |       |       |      |      |       |      |     |       |       |      |       |     |      | 100   | 61           |
| 12   | 3        | Cal + Qz | 29.29  |      |       |       |      | 1.27 | 69.43 |      |      |       |       |      |      |       |      |     |       |       |      |       |     |      | 100   | 63           |
| 12   | 4        | Py       | 0.55   |      |       | 27.44 | 0.30 |      | 0.48  | 0.33 |      |       | 70.90 |      |      |       |      |     |       |       |      |       |     |      | 100   | 195          |
| 12   | 5        | Cal + Qz | 3.28   |      |       |       |      | 0.78 | 95.94 |      |      |       |       |      |      |       |      |     |       |       |      |       |     |      | 100   | 51           |
| 12   | 6        | Cal + Qz | 34.50  |      |       |       |      | 0.78 | 64.72 |      |      |       |       |      |      |       |      |     |       |       |      |       |     |      | 100   | 68           |
| 12   | 7        | Py +     | 30.09  |      |       | 25.51 |      |      | 0.53  | 0.34 |      |       | 43.54 |      |      |       |      |     |       |       |      |       |     |      | 100   | 148          |
| 12   | 8        | Cal + Qz | 3.33   |      |       |       |      | 1.25 | 95.42 |      |      |       |       |      |      |       |      |     |       |       |      |       |     |      | 100   | 55           |
| 13   | 1        | Qz       | 100.00 |      |       |       |      |      |       |      |      |       |       |      |      |       |      |     |       |       |      |       |     |      | 100   | 107          |
| 13   | 2        | ZnO + Qz | 24.26  |      | 1.12  |       |      |      | 0.61  |      |      |       |       |      |      |       |      |     | 74.01 |       |      |       |     |      | 100   | 133          |
| 13   | 3        | Cal + Qz | 6.08   |      |       |       |      |      | 93.92 |      |      |       |       |      |      |       |      |     |       |       |      |       |     |      | 100   | 55           |
| 13   | 4        | Qz + Cal | 56.36  |      |       |       |      | 0.47 | 43.17 |      |      |       |       |      |      |       |      |     |       |       |      |       |     |      | 100   | 81           |
| 13   | 5        | Cal + Qz | 18.16  |      |       |       |      | 1.35 | 80.49 |      |      |       |       |      |      |       |      |     |       |       |      |       |     |      | 100   | 61           |
| 13   | 6        | Cal + Qz | 28.05  |      |       |       |      | 0.97 | 70.99 |      |      |       |       |      |      |       |      |     |       |       |      |       |     |      | 100   | 60           |
| 14   | 1        | Br       |        |      |       |       |      |      |       |      |      |       | 36.47 |      |      | -0.22 |      |     |       |       |      | 63.75 |     |      | 100   | 102          |
| 14   | 2        | Br       | 4.60   |      | 1.17  |       |      |      |       | 2.47 | 1.83 |       | 30.22 |      | 1.77 | -0.01 |      |     |       |       | 4.27 | 53.67 |     |      | 100   | 107          |
| 14   | 3        | Br       | 2.91   |      |       |       |      |      | 0.46  |      |      |       | 35.54 |      |      | 0.10  |      |     |       |       |      | 60.99 |     |      | 100   | 104          |
| 14   | 4        | Cal + Qz | 25.04  |      | 0.68  | 0.63  |      | 1.20 | 72.46 |      |      |       |       |      |      |       |      |     |       |       |      |       |     |      | 100   | 59           |
| 14   | 5        | Cal + Qz | 12.33  |      |       |       |      | 0.92 | 82.16 | 1.59 | 1.08 |       | 1.06  |      | 0.86 |       |      |     |       |       |      |       |     |      | 100   | 49           |
| 14   | 6        | Br       |        |      |       |       |      |      | 0.72  |      |      |       | 36.44 |      |      | -0.17 |      |     |       |       |      | 63.02 |     |      | 100   | 103          |
| 14   | 7        | Cal + Qz | 13.77  |      |       |       |      | 0.64 | 85.58 |      |      |       |       |      |      |       |      |     |       |       |      |       |     |      | 100   | 55           |
| 14   | 8        | Qz       | 99.65  |      |       |       |      |      | 0.35  |      |      |       |       |      |      |       |      |     |       |       |      |       |     |      | 100   | 103          |
| 14   | 9        | Qz       | 99.79  |      |       |       |      |      | 0.21  |      |      |       |       |      |      |       |      |     |       |       |      |       |     |      | 100   | 101          |
| 14   | 10       | Qz       | 97.52  |      |       |       |      |      | 2.48  |      |      |       |       |      |      |       |      |     |       |       |      |       |     |      | 100   | 106          |
| 15   | 1        | Br       | 1.17   |      |       |       |      |      |       |      |      |       | 36.45 |      |      |       |      |     |       |       |      | 62.38 |     |      | 100   | 103          |
| 15   | 2        | Br       | 13.60  |      |       |       |      |      |       |      |      |       | 30.72 |      |      | -0.10 |      |     |       |       |      | 55.78 |     |      | 100   | 104          |
| 15   | 3        | Br +     | 13.68  |      |       |       |      |      | 0.64  |      |      |       | 30.76 |      |      | -0.07 |      |     |       |       |      | 54.99 |     |      | 100   | 107          |
| 15   | 4        | Cal + Qz | 49.58  |      |       |       |      | 0.51 | 49.91 |      |      |       |       |      |      |       |      |     |       |       |      |       |     |      | 100   | 75           |
| 15   | 5        | Qz       | 99.73  |      |       |       |      |      | 0.27  |      |      |       |       |      |      |       |      |     |       |       |      |       |     |      | 100   | 104          |
| 15   | 6        | Qz       | 99.59  |      |       |       |      |      | 0.41  |      |      |       |       |      |      |       |      |     |       |       |      |       |     |      | 100   | 102          |
| 15   | 7        | Qz       | 99.50  |      |       |       |      |      | 0.50  |      |      |       |       |      |      |       |      |     |       |       |      |       |     |      | 100   | 106          |



Supplementary Material S6: SEM-BSE images and Electron Dispersive Spectroscopy (EDS) mineral analyses for sample AX1B (Zoom).

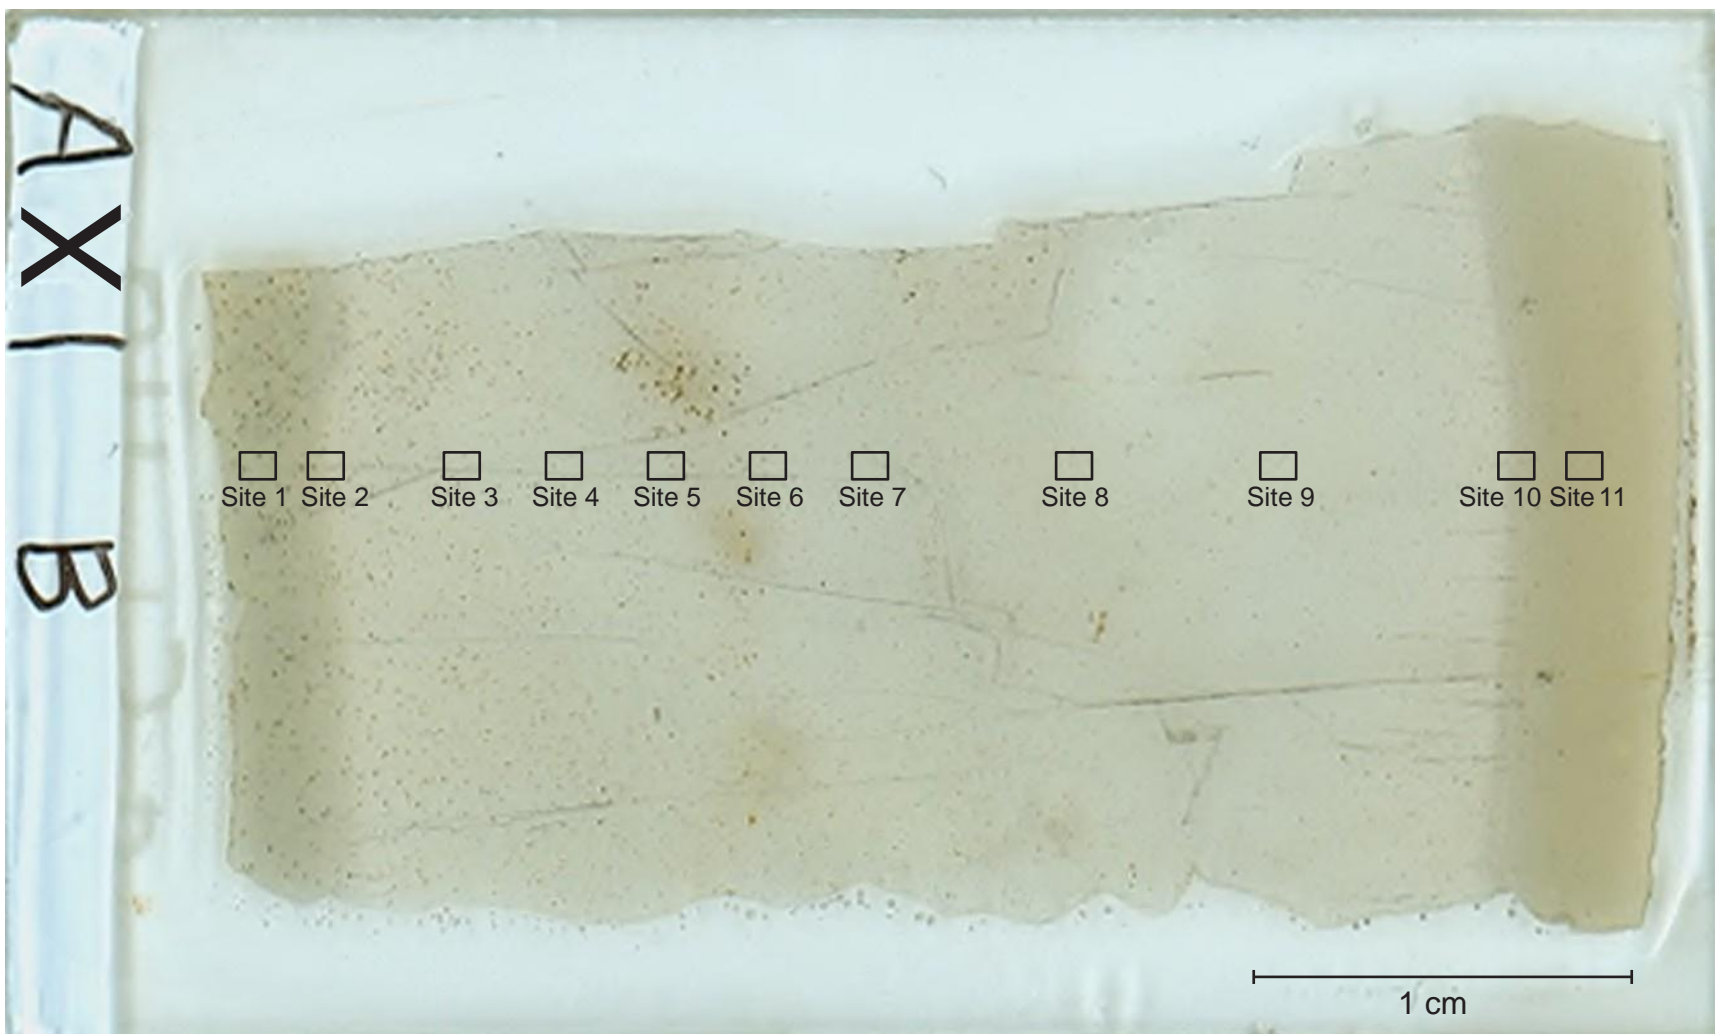

Figure S6.1: AX1B thin section showing respective sites taken for mineral chemical analyses (EDS) via Scanning Electron Microscope (SEM) (zooms in Appendix A1).

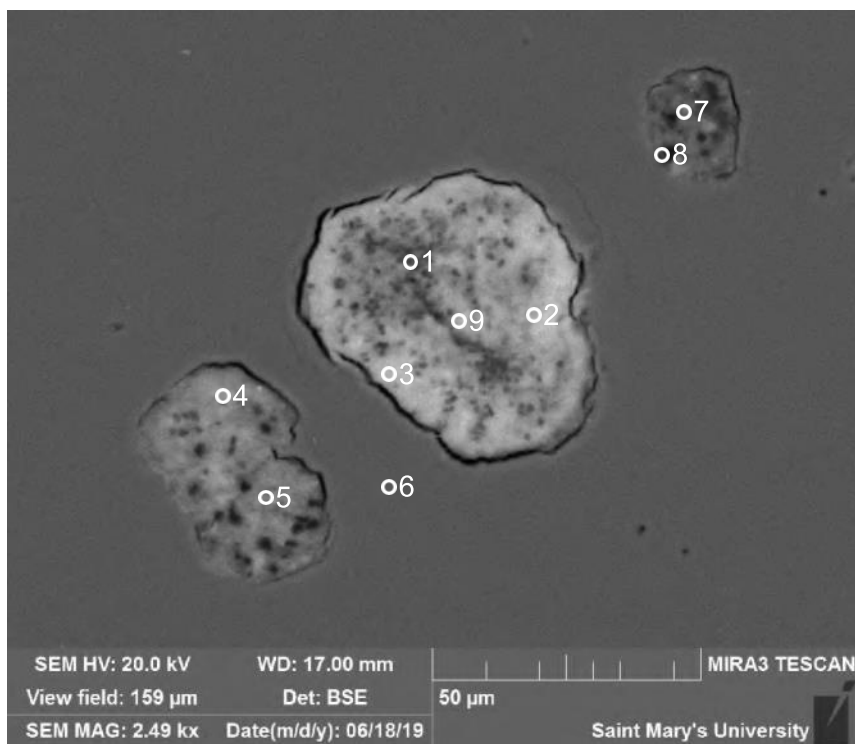

- 1:"Sphalerite" +
- 2:"Sphalerite" +
- 3:"Sphalerite" +
- 4:"Sphalerite" +
- 5:"Sphalerite" +
- 6:Quartz
- 7:"Sphalerite" +
- 8:"Sphalerite" +
- 9:"Sphalerite" +

Figure S6.2: AX1B (SEM) Site 5, Position 4,10 from Appendix S6 (AX1B), (Table A6.1). Voids in silica concretion filled with "sphalerite", clay, and probably calcite.

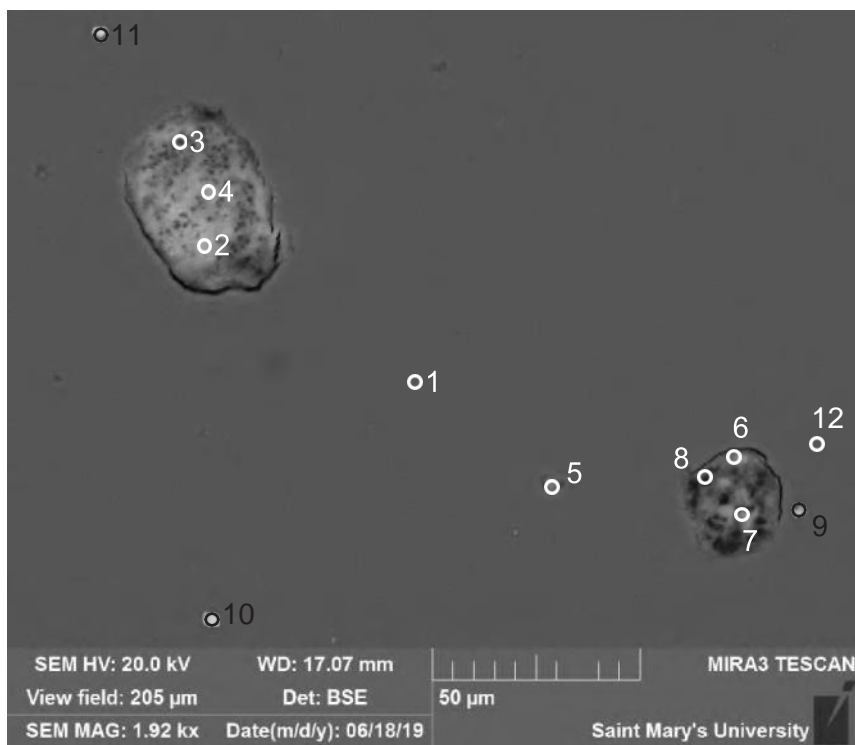

- 1:Quartz
- 2:"Sphalerite" +
- 3:"Sphalerite" +
- 4:"Sphalerite" +
- 5:"Sphalerite" + Quartz +
- 6:"Sphalerite" +
- 7:"Sphalerite" +
- 8:"Sphalerite" +
- 9:FeOhy + Quartz
- 10:FeOhy +
- 11:FeOhy +
- 12:Quartz

Figure S6.3: AX1B (SEM) Site 5, Position 7 from Appendix A6 (AX1B), (Table S6.1). The minerals present in the large voids (2-4,6-8) are similar to those in the voids of Fig. S6.1. However there are also smaller voids (9-11) filled only with goethite.

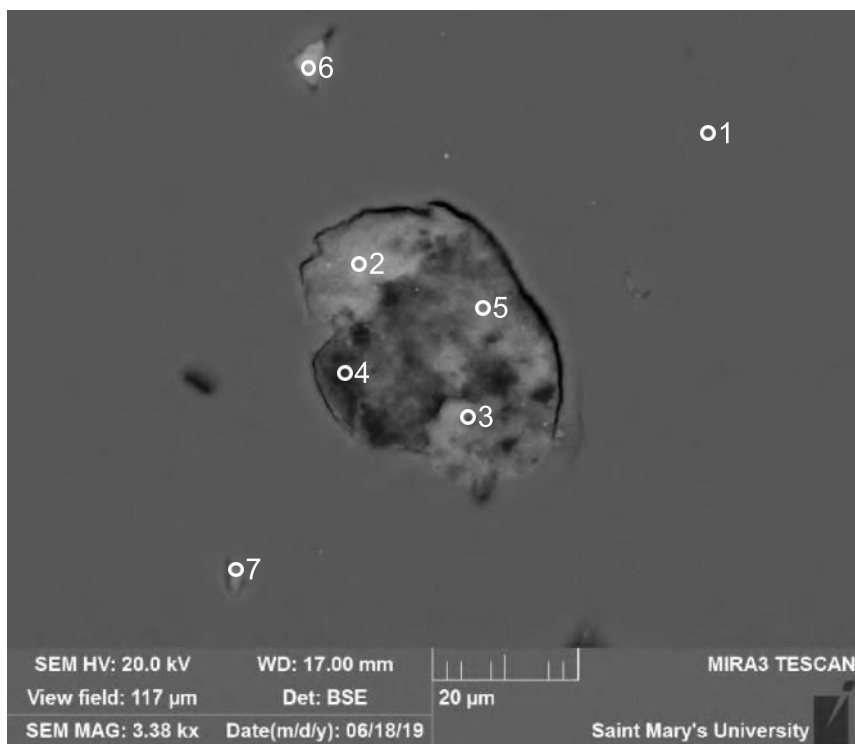

- 1: Quartz
- 2: "Sphalerite" +
- 3: "Sphalerite" +
- 4: "Sphalerite" +
- 5: "Sphalerite" +
- 6: "Sphalerite" +
- 7: "Sphalerite" + Quartz +

Figure S6.4: AX1B (SEM) Site 6, Position 7 from Appendix A6 (AX1B), (Table S6.1). Similar to Fig. A6.1.

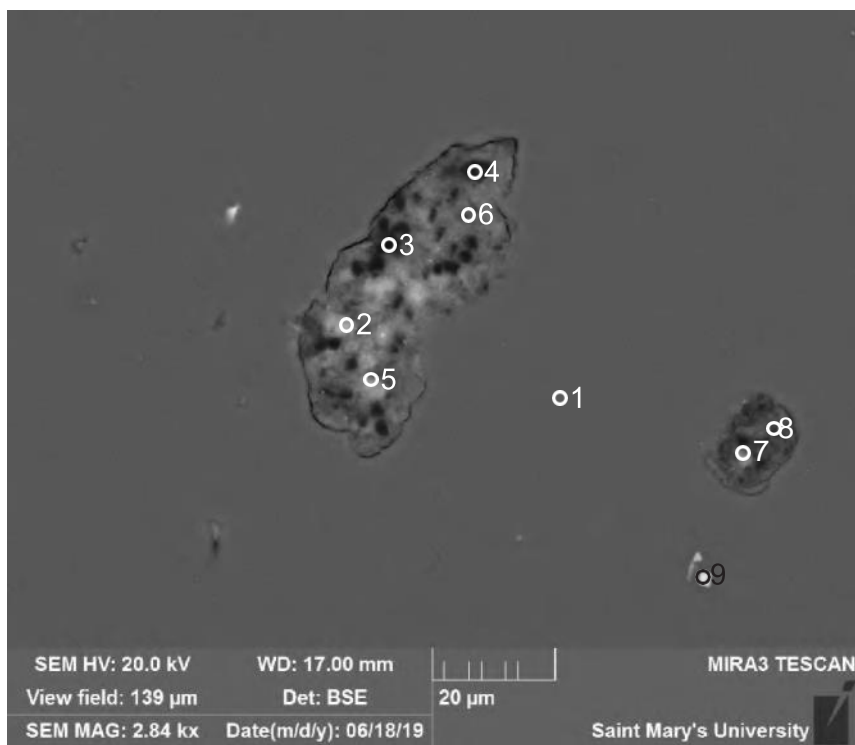

- 1: Quartz
- 2: "Sphalerite" +
- 3: "Sphalerite" +
- 4: "Sphalerite" +
- 5: "Sphalerite" +
- 6: "Sphalerite" +
- 7: "Sphalerite" +
- 8: "Sphalerite" +
- 9: FeOhy + Quartz

Figure S6.5: AX1B (SEM) Site 6, Position 8 from Supplementary Material S6 (AX1B), (Table S6.1). Similar to Fig. S6.1.

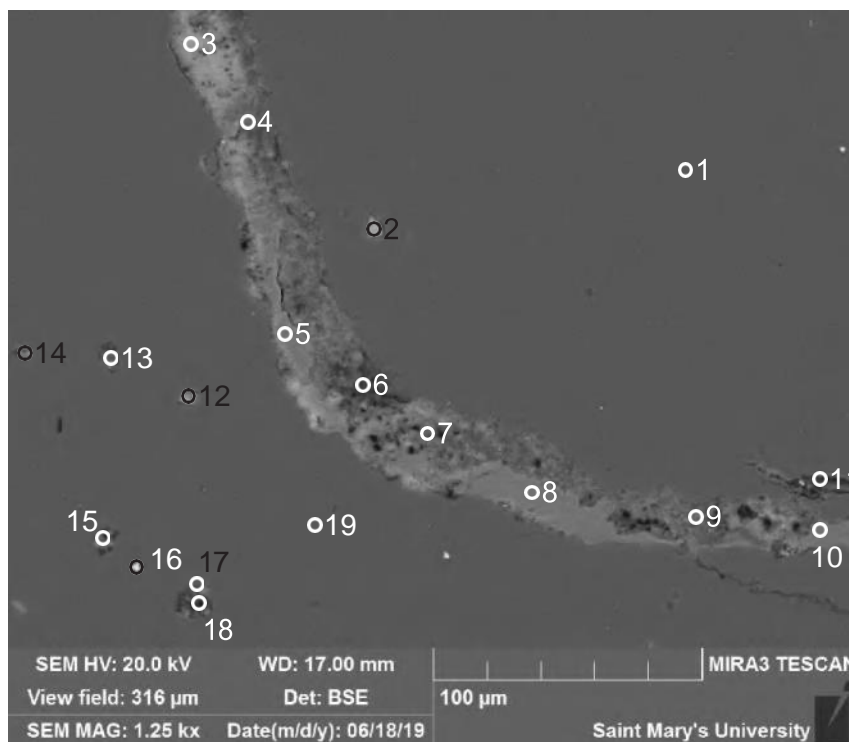

- 1:Quartz
- 2:"Sphalerite" +
- 3:"Sphalerite" + Calcite +
- 4:"Sphalerite" + Calcite +
- 5:Calcite +
- 6:Quartz + "Sphalerite" +
- 7:"Sphalerite" + Quartz +
- 8:Calcite +
- 9:"Sphalerite" + Quartz +
- 10:Calcite +
- 11:Quartz +
- 12:"Sphalerite" + Quartz +
- 13:"Sphalerite" + Quartz +
- 14:"Sphalerite" + Quartz +
- 15:"Sphalerite" + Quartz +
- 16:FeOhy + Quartz +
- 17:"Sphalerite" + Quartz +
- 18:"Sphalerite" + Quartz +
- 19:Quartz

Figure S6.6: AX1B (SEM) Site 7, Position 4,6 from Supplementary Material S6 (AX1B), (Table S6.1). Probably a vein filled with calcite (e.g. 5,10), "sphalerite" (e.g. 3) and clay (e.g. 4,6). Small voids are filled mostly with "sphalerite" (2,12), clay and probably calcite and only one (16) with goethite.

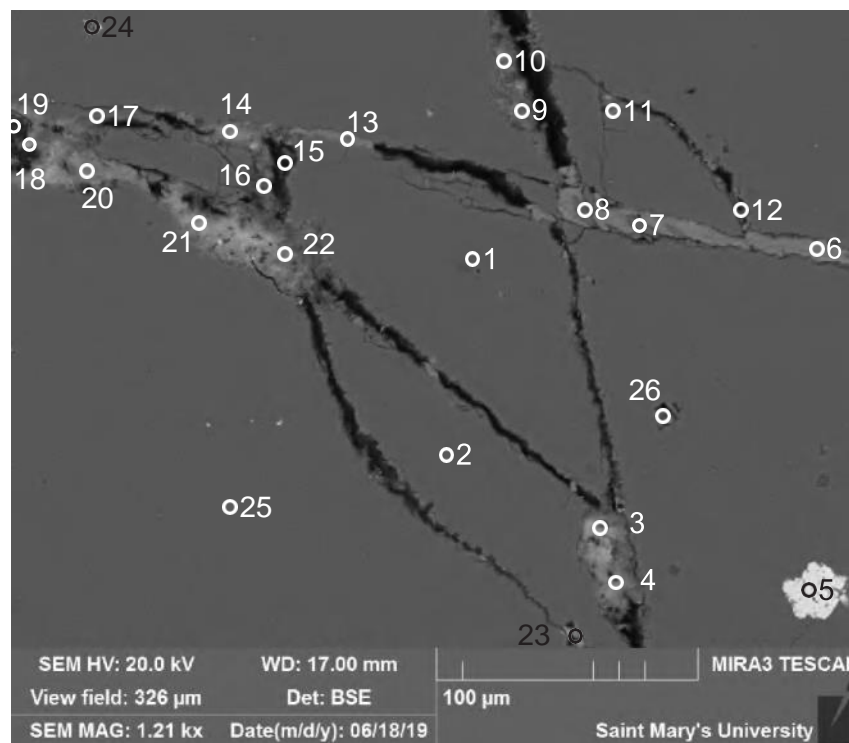

- 1:Quartz
- 2:Quartz
- 3:"Sphalerite" +
- 4:"Sphalerite" +
- 5:FeOhy +
- 6:Calcite +
- 7:Quartz + Calcite
- 8:Quartz + Calcite +
- 9:"Sphalerite" +
- 10:"Sphalerite" +
- 11:Quartz + "Sphalerite"
- 12:Quartz + "Sphalerite" + Calcite
- 13:Quartz + "Sphalerite" + Calcite
- 14:"Sphalerite" + Quartz +
- 15:"Sphalerite" + Quartz +
- 16:"Sphalerite" + Quartz +
- 17:Quartz
- 18:"Sphalerite" + Quartz +
- 19:Quartz + "Sphalerite" +
- 20:Calcite + "Sphalerite"
- 21:"Sphalerite" +
- 22:"Sphalerite" +
- 23:"Sphalerite" + Calcite +
- 24:"Sphalerite" + Quartz +
- 25:Quartz
- 26:"Sphalerite" + Quartz +

Figure S6.7: AX1B (SEM) Site 7, Position 3,5,7 from Supplementary Material S6 (AX1B), (Table S6.1). Network of veinlets. All these veinlets are filled in the same way as in Fig. S6.5 ("sphalerite, calcite, clay). A void (5) is filled with goethite.

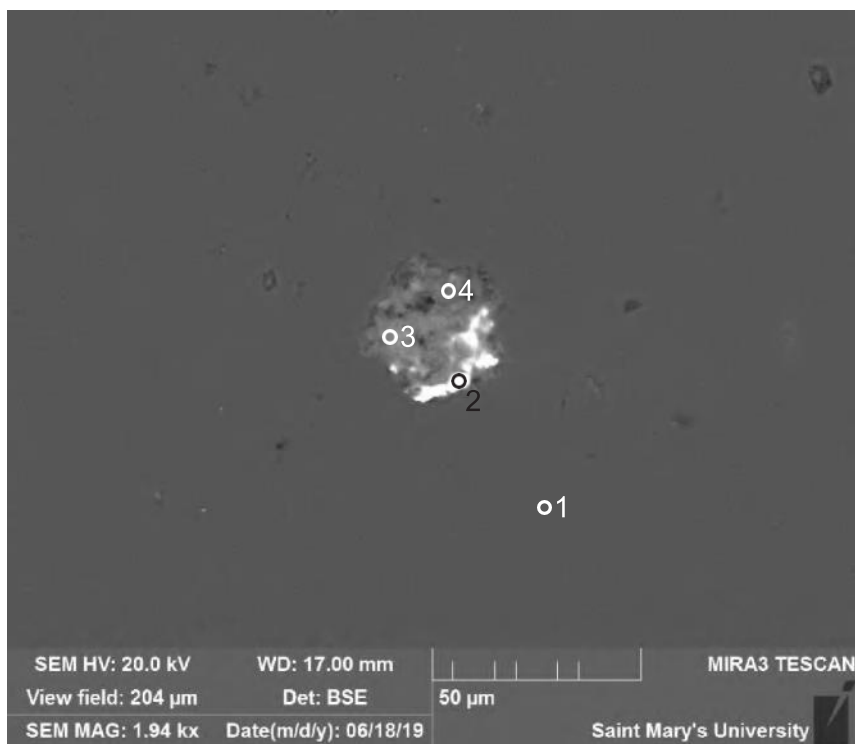

- 1:Quartz
- 2:Barite + "Sphalerite" +
- 3:"Sphalerite" +
- 4:"Sphalerite" +

Figure S6.8: AX1B (SEM) Site 8, Position 4,5 from Supplementary Material S6, (Table S6.1). A void filled with "sphalerite" (4), barite (2), clay and probably some calcite (4).

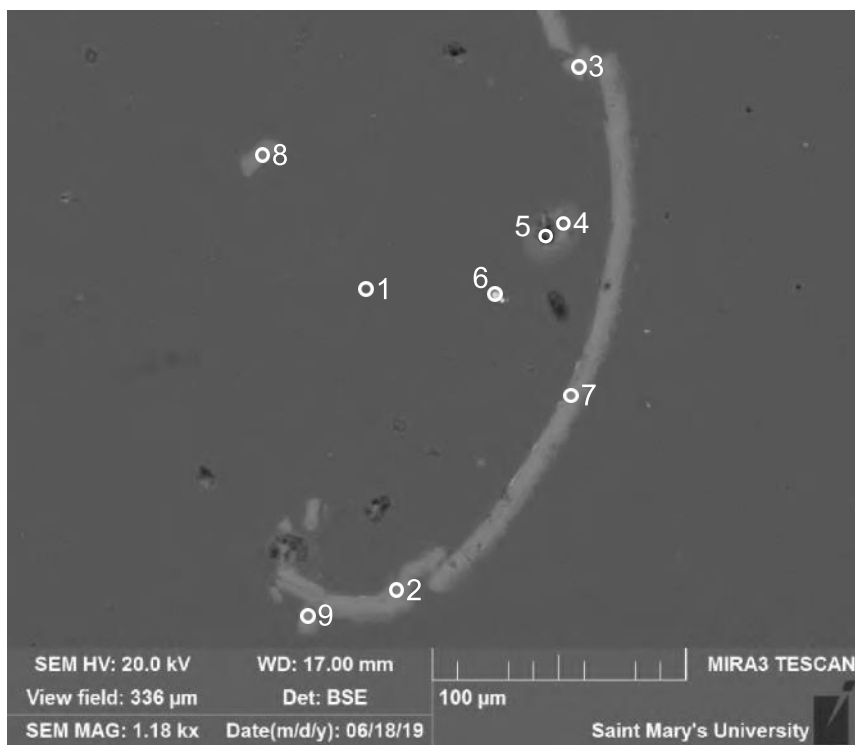

- 1:Quartz
- 2:Apatite + Quartz
- 3:Apatite + Quartz
- 4:Apatite + Quartz
- 5:"Sphalerite" + Apatite +
- 6:FeOhy +
- 7:Apatite + Quartz
- 8:Apatite + Quartz
- 9:Apatite + Quartz

Figure S6.9: AX1B (SEM) Site 9, Position 3,4,7 from Supplementary Material S6 (AX1B), (Table S6.1). Probably a fossil now replaced by apatite (e.g. 7). Voids are filled as is in Fig. S6.2. Small pieces of apatite are also present (4,8,9).



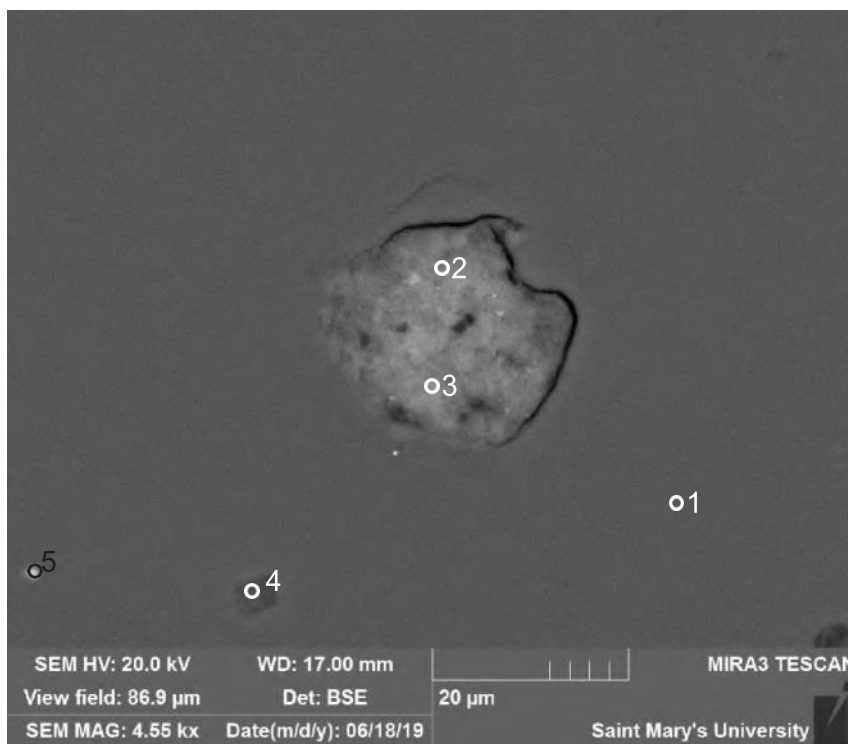

- 1:Quartz
- 2:"Sphalerite" +
- 3:"Sphalerite" +
- 4:"Sphalerite" + Quartz +
- 5:FeOhy + Quartz

Figure S6.9: AX1B (SEM) Site 9, Position 5 from Supplementary Material S6 (AX1B),10 (Table S6.1). Similar to Fig. S6.2.

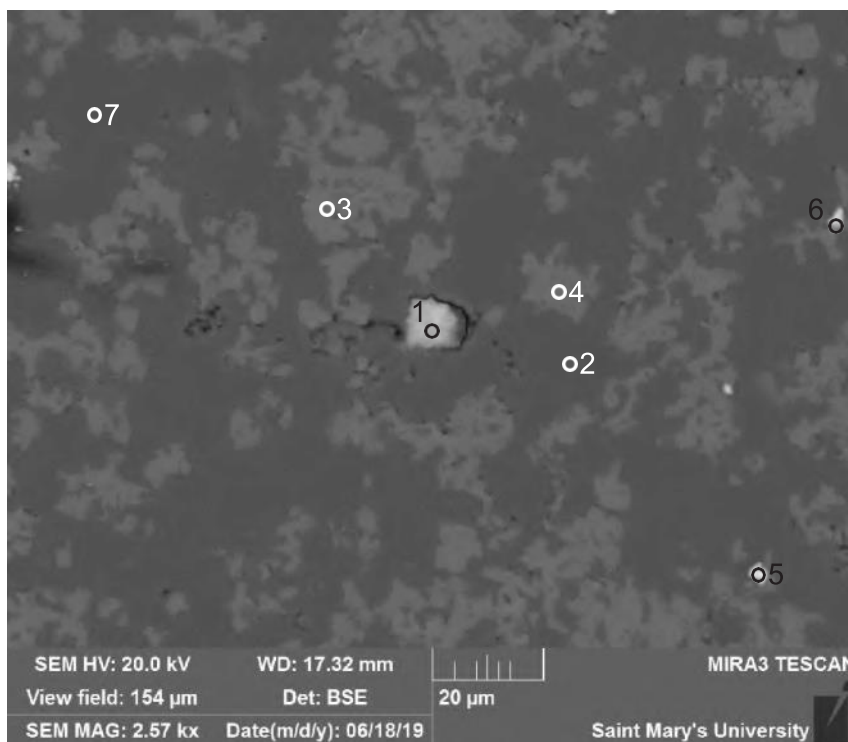

- 1:"Sphalerite" +
- 2:Quartz
- 3:Calcite + Quartz
- 4:Calcite +
- 5:FeOhy + Quartz + Calcite
- 6:FeOhy + Quartz + Calcite
- 7:Quartz

Figure S6.11: AX1B (SEM) Site 11, Position 6 from Supplementary Material S6 (AX1B), (Table S6.1). Scattered patches of calcite (3,4), and goethite (5,6) and void partly filled with "sphalerite", clay and probably calcite.

Table S6.1: Scanning Electron Microscope (SEM) mineral chemical analyses (EDS) of selected sites and positions of sample AX1B.

| Sample | Site + Position from Appendix A1 | Position | Mineral      | SiO2   | TiO2 | Al2O3 | FeO   | MnO  | MgO  | CaO   | Na2O | K2O  | P2O5 | SO3   | F | Cl   | CoO | NiO  | CuO  | ZnO   | As2O3 | BaO  | PbO  | Total | Actual Total |
|--------|----------------------------------|----------|--------------|--------|------|-------|-------|------|------|-------|------|------|------|-------|---|------|-----|------|------|-------|-------|------|------|-------|--------------|
| AX1B   | 5-4,10                           | 1        | Sp +         | 21.71  |      | 2.30  | 1.88  |      | 3.48 | 7.71  |      | 0.54 |      | 36.33 |   | 0.96 |     |      |      | 25.09 |       |      |      | 100   | 40           |
| AX1B   | 5-4,10                           | 2        | Sp +         | 18.10  |      | 2.09  | 1.37  |      | 5.00 | 8.49  |      |      |      | 35.53 |   | 0.90 |     |      |      | 27.63 | 0.09  | 0.80 |      | 100   | 96           |
| AX1B   | 5-4,10                           | 3        | Sp +         | 19.97  |      | 2.47  | 1.76  |      | 4.26 | 8.93  |      | 0.33 |      | 33.41 |   | 0.83 |     |      |      | 27.66 | 0.37  |      |      | 100   | 93           |
| AX1B   | 5-4,10                           | 4        | Sp +         | 24.77  |      | 2.93  | 2.56  |      | 4.44 | 7.05  |      | 0.32 |      | 29.99 |   | 1.26 |     |      |      | 26.56 | 0.12  |      |      | 100   | 60           |
| AX1B   | 5-4,10                           | 5        | Sp +         | 21.20  |      | 2.86  | 1.74  |      | 5.12 | 7.57  |      |      |      | 33.21 |   | 1.05 |     |      |      | 27.25 |       |      |      | 100   | 52           |
| AX1B   | 5-4,10                           | 6        | Qz           | 100.00 |      |       |       |      |      |       |      |      |      |       |   |      |     |      |      |       |       |      |      | 100   | 118          |
| AX1B   | 5-4,10                           | 7        | Sp +         | 20.93  |      | 2.46  | 1.87  |      | 5.10 | 7.03  |      |      |      | 32.03 |   | 1.46 |     |      |      | 29.14 |       |      |      | 100   | 44           |
| AX1B   | 5-4,10                           | 8        | Sp +         | 29.53  |      |       |       |      | 6.44 | 9.87  |      |      |      | 43.52 |   |      |     |      |      | 10.64 |       |      |      | 100   | 12           |
| AX1B   | 5-4,10                           | 9        | Sp +         | 18.02  |      | 1.63  | 1.17  |      | 4.85 | 9.04  |      |      |      | 34.63 |   | 0.78 |     |      |      | 29.83 | 0.03  |      |      | 100   | 87           |
| AX1B   | 5-7                              | 1        | Qz           | 100.00 |      |       |       |      |      |       |      |      |      |       |   |      |     |      |      |       |       |      |      | 100   | 117          |
| AX1B   | 5-7                              | 2        | Sp +         | 22.99  | 0.50 | 2.48  | 1.92  |      | 4.38 | 7.62  |      |      |      | 32.62 |   | 0.75 |     |      |      | 27.13 | -0.38 |      |      | 100   | 90           |
| AX1B   | 5-7                              | 3        | Sp +         | 24.92  |      | 3.06  | 1.92  |      | 3.90 | 7.72  |      |      |      | 35.25 |   | 0.99 |     |      |      | 22.23 |       |      |      | 100   | 35           |
| AX1B   | 5-7                              | 4        | Sp +         | 21.97  | 0.51 | 2.27  | 1.82  |      | 4.27 | 7.85  |      |      |      | 31.92 |   | 0.75 |     |      |      | 28.65 |       |      |      | 100   | 83           |
| AX1B   | 5-7                              | 5        | Sp + Qz +    | 62.30  | 0.45 | 1.87  | 2.79  |      | 0.57 | 1.26  |      | 0.27 |      | 14.27 |   | 0.24 |     |      |      | 15.97 |       |      |      | 100   | 111          |
| AX1B   | 5-7                              | 6        | Sp +         | 30.47  |      | 2.08  | 1.46  |      | 4.78 | 8.11  |      |      |      | 28.23 |   | 0.83 |     |      |      | 24.15 | -0.10 |      |      | 100   | 77           |
| AX1B   | 5-7                              | 7        | Sp +         | 23.79  | 0.59 | 2.08  | 1.45  |      | 4.20 | 5.71  |      |      |      | 33.58 |   | 0.82 |     |      |      | 27.55 | 0.23  |      |      | 100   | 64           |
| AX1B   | 5-7                              | 8        | Sp +         | 22.60  |      | 2.61  |       |      | 6.74 | 21.51 |      |      |      | 32.62 |   |      |     |      |      | 13.91 |       |      |      | 100   | 16           |
| AX1B   | 5-7                              | 9        | FeOhy + Qz   | 77.46  |      |       | 22.54 |      |      |       |      |      |      |       |   |      |     |      |      |       |       |      |      | 100   | 112          |
| AX1B   | 5-7                              | 10       | FeOhy +      | 39.11  |      | 0.78  | 58.64 |      |      | 0.77  |      |      |      |       |   |      |     | 0.70 |      |       |       |      |      | 100   | 95           |
| AX1B   | 5-7                              | 11       | FeOhy +      | 52.01  |      |       | 46.40 |      |      | 0.53  |      |      |      |       |   |      |     | 0.46 | 0.60 |       |       |      |      | 100   | 100          |
| AX1B   | 5-7                              | 12       | Qz           | 100.00 |      |       |       |      |      |       |      |      |      |       |   |      |     |      |      |       |       |      |      | 100   | 118          |
| AX1B   | 6-7                              | 1        | Qz           | 100.00 |      |       |       |      |      |       |      |      |      |       |   |      |     |      |      |       |       |      |      | 100   | 120          |
| AX1B   | 6-7                              | 2        | Sp +         | 23.22  |      | 2.95  | 2.08  |      | 4.26 | 9.54  |      | 0.35 |      | 28.16 |   | 0.83 |     |      |      | 23.85 |       |      | 4.74 | 100   | 79           |
| AX1B   | 6-7                              | 3        | Sp +         | 32.22  |      | 3.83  | 2.18  |      | 5.51 | 7.82  |      |      |      | 29.51 |   | 0.91 |     |      |      | 18.02 |       |      |      | 100   | 24           |
| AX1B   | 6-7                              | 4        | Sp +         | 25.78  |      |       | 1.77  |      | 7.16 | 10.17 |      |      |      | 30.10 |   |      |     |      |      | 25.01 |       |      |      | 100   | 17           |
| AX1B   | 6-7                              | 5        | Sp +         | 27.30  |      | 3.55  | 2.91  |      | 5.31 | 9.19  |      |      |      | 27.04 |   | 0.81 |     |      |      | 23.56 | 0.31  |      |      | 100   | 58           |
| AX1B   | 6-7                              | 6        | Sp +         | 33.73  | 0.46 | 2.41  | 1.61  |      | 3.29 | 6.47  |      | 0.34 |      | 26.63 |   | 0.59 |     |      |      | 24.39 | 0.07  |      |      | 100   | 108          |
| AX1B   | 6-7                              | 7        | Sp + Qz +    | 63.69  | 0.41 | 1.58  | 1.69  |      | 1.26 | 1.93  |      | 0.23 |      | 14.33 |   | 0.27 |     |      |      | 14.61 | 0.00  |      |      | 100   | 110          |
| AX1B   | 6-8                              | 1        | Qz           | 100.00 |      |       |       |      |      |       |      |      |      |       |   |      |     |      |      |       |       |      |      | 100   | 120          |
| AX1B   | 6-8                              | 2        | Sp +         | 18.15  |      | 2.02  | 1.36  |      | 4.46 | 6.97  |      |      |      | 34.43 |   | 0.71 |     |      |      | 31.71 | 0.19  |      |      | 100   | 79           |
| AX1B   | 6-8                              | 3        | Sp +         | 26.77  |      | 4.77  | 1.76  |      | 7.84 | 9.98  |      |      |      | 31.21 |   |      |     |      |      | 17.66 |       |      |      | 100   | 18           |
| AX1B   | 6-8                              | 4        | Sp +         | 23.22  |      | 4.19  | 2.33  |      | 6.34 | 9.30  |      |      |      | 31.13 |   | 1.24 |     |      |      | 22.24 |       |      |      | 100   | 27           |
| AX1B   | 6-8                              | 5        | Sp +         | 21.56  |      | 1.89  | 1.73  |      | 5.52 | 7.25  |      |      |      | 31.38 |   | 0.67 |     |      |      | 29.66 | 0.34  |      |      | 100   | 70           |
| AX1B   | 6-8                              | 6        | Sp +         | 26.20  |      | 2.80  | 1.88  |      | 4.61 | 7.40  |      | 0.45 |      | 29.82 |   | 0.56 |     |      |      | 26.20 | 0.09  |      |      | 100   | 43           |
| AX1B   | 6-8                              | 7        | Sp +         | 14.95  |      | 1.84  | 1.44  |      | 4.74 | 6.59  |      |      |      | 37.38 |   | 0.64 |     |      |      | 32.49 | -0.06 |      |      | 100   | 47           |
| AX1B   | 6-8                              | 8        | Sp +         | 14.74  |      | 1.53  | 1.33  |      | 8.99 | 13.41 |      |      |      | 35.75 |   |      |     |      |      | 24.25 |       |      |      | 100   | 31           |
| AX1B   | 6-8                              | 9        | FeOhy + Qz   | 56.77  |      |       | 41.31 | 0.43 |      | 0.39  |      |      |      |       |   |      |     | 0.46 | 0.64 |       |       |      |      | 100   | 115          |
| AX1B   | 7-4,6                            | 1        | Qz           | 100.00 |      |       |       |      |      |       |      |      |      |       |   |      |     |      |      |       |       |      |      | 100   | 120          |
| AX1B   | 7-4,6                            | 2        | Sp +         | 25.12  |      | 2.29  | 1.64  |      | 3.70 | 7.80  |      | 0.38 |      | 31.63 |   |      |     |      |      | 26.34 | 0.05  | 1.05 |      | 100   | 97           |
| AX1B   | 7-4,6                            | 3        | Sp + Cal +   | 16.97  |      | 2.02  | 1.48  |      | 3.20 | 33.43 |      | 0.33 |      | 22.09 |   | 0.35 |     |      |      | 20.14 |       |      |      | 100   | 80           |
| AX1B   | 7-4,6                            | 4        | Sp + Cal +   | 40.98  |      | 2.92  | 2.33  |      | 3.82 | 10.82 |      | 0.48 |      | 20.83 |   | 0.39 |     |      |      | 17.16 | 0.28  |      |      | 100   | 73           |
| AX1B   | 7-4,6                            | 5        | Cal +        | 2.82   |      |       |       |      |      | 95.12 |      |      |      | 0.92  |   |      |     |      |      | 1.14  |       |      |      | 100   | 60           |
| AX1B   | 7-4,6                            | 6        | Qz + Sp +    | 74.19  |      | 0.93  | 0.89  |      | 1.97 | 3.29  |      |      |      | 10.43 |   | 0.32 |     |      |      | 7.99  |       |      |      | 100   | 82           |
| AX1B   | 7-4,6                            | 7        | Sp + Qz +    | 44.51  |      | 2.27  | 1.94  |      | 3.65 | 8.76  |      |      |      | 22.05 |   |      |     |      |      | 16.82 |       |      |      | 100   | 58           |
| AX1B   | 7-4,6                            | 8        | Cal +        | 2.62   |      |       |       |      |      | 95.42 |      |      |      | 1.03  |   |      |     |      |      | 0.93  |       |      |      | 100   | 60           |
| AX1B   | 7-4,6                            | 9        | Sp + Qz +    | 40.67  |      | 1.26  | 1.17  |      | 4.25 | 8.25  |      |      |      | 24.72 |   | 0.32 |     |      |      | 19.60 | -0.23 |      |      | 100   | 78           |
| AX1B   | 7-4,6                            | 10       | Cal +        | 3.26   |      |       |       |      |      | 95.75 |      |      |      |       |   |      |     |      |      | 0.98  |       |      |      | 100   | 61           |
| AX1B   | 7-4,6                            | 11       | Qz +         | 96.88  |      |       |       |      | 0.31 | 0.39  |      |      |      | 1.51  |   |      |     |      |      | 0.91  |       |      |      | 100   | 97           |
| AX1B   | 7-4,6                            | 12       | Sp + Qz +    | 38.35  |      | 3.62  | 2.29  | 0.47 | 3.13 | 6.36  |      | 0.44 |      | 23.84 |   | 0.63 |     |      |      | 19.04 |       | 1.84 |      | 100   | 91           |
| AX1B   | 7-4,6                            | 13       | Sp + Qz +    | 72.83  |      | 0.69  | 0.56  |      | 1.01 | 2.41  |      |      |      | 11.47 |   | 0.26 |     |      |      | 10.78 |       |      |      | 100   | 108          |
| AX1B   | 7-4,6                            | 14       | Sp + Qz +    | 65.73  |      | 0.80  | 0.53  |      | 1.79 | 2.78  |      |      |      | 14.70 |   | 0.38 |     |      |      | 13.13 | 0.15  |      |      | 100   | 107          |
| AX1B   | 7-4,6                            | 15       | Sp + Qz +    | 43.32  |      | 1.63  | 0.86  |      | 3.36 | 6.97  |      |      |      | 22.85 |   | 0.42 |     |      |      | 20.58 | 0.00  |      |      | 100   | 64           |
| AX1B   | 7-4,6                            | 16       | FeOhy + Qz + | 43.62  |      |       | 52.37 | 0.48 |      | 0.46  |      |      |      | 0.87  |   |      |     | 0.50 | 0.97 | 0.73  |       |      |      | 100   | 109          |
| AX1B   | 7-4,6                            | 17       | Sp + Qz +    | 56.47  |      | 0.85  | 0.83  |      | 2.01 | 3.61  |      |      |      | 18.38 |   | 0.41 |     |      |      | 17.08 | 0.36  |      |      | 100   | 69           |
| AX1B   | 7-4,6                            | 18       | Sp + Qz +    | 63.42  |      |       | 1.54  |      | 1.60 | 2.31  |      |      |      | 16.02 |   | 0.43 |     |      |      | 14.68 |       |      |      | 100   | 88           |
| AX1B   | 7-4,6                            | 19       | Qz           | 100.00 |      |       |       |      |      |       |      |      |      |       |   |      |     |      |      |       |       |      |      | 100   | 120          |
| AX1B   | 7-3,5,7                          | 1        | Qz           | 99.53  |      | 0.47  |       |      |      |       |      |      |      |       |   |      |     |      |      |       |       |      |      | 100   | 112          |
| AX1B   | 7-3,5,7                          | 2        | Qz           | 100.00 |      |       |       |      |      |       |      |      |      |       |   |      |     |      |      |       |       |      |      | 100   | 120          |
| AX1B   | 7-3,5,7                          | 3        | Sp +         | 24.29  |      | 3.53  | 1.98  |      | 4.97 | 7.68  |      |      |      | 31.17 |   | 0.94 |     |      |      | 25.57 | -0.13 |      |      | 100   | 64           |

Table S6.1: Scanning Electron Microscope (SEM) mineral chemical analyses (EDS) of selected sites and positions of sample AX1B.

| Sample | Site +<br>Position from<br>Appendix A1 | Position | Mineral          | SiO2   | TiO2 | Al2O3 | FeO   | MnO  | MgO  | CaO   | Na2O | K2O  | P2O5  | SO3   | F    | Cl   | CoO  | NiO | CuO  | ZnO   | As2O3 | BaO   | PbO  | Total | Actual Total |
|--------|----------------------------------------|----------|------------------|--------|------|-------|-------|------|------|-------|------|------|-------|-------|------|------|------|-----|------|-------|-------|-------|------|-------|--------------|
| AX1B   | 7-3,5,7                                | 4        | Sp +             | 28.55  |      | 3.08  | 2.08  |      | 3.92 | 7.93  |      | 0.37 |       | 28.63 |      | 0.94 |      |     |      | 24.58 | -0.08 |       |      | 100   | 65           |
| AX1B   | 7-3,5,7                                | 5        | FeOhy +          | 6.75   |      |       | 88.46 | 1.40 |      | 0.80  |      |      |       | 1.27  |      |      |      |     | 1.32 |       |       |       |      | 100   | 80           |
| AX1B   | 7-3,5,7                                | 6        | Cal +            | 5.89   |      |       |       |      | 0.62 | 91.30 |      |      |       | 1.26  |      |      |      |     |      | 0.92  |       |       |      | 100   | 61           |
| AX1B   | 7-3,5,7                                | 7        | Qz + Cal         | 61.43  |      |       |       |      |      | 38.57 |      |      |       |       |      |      |      |     |      |       |       |       |      | 100   | 89           |
| AX1B   | 7-3,5,7                                | 8        | Qz + Cal +       | 71.21  |      |       |       |      |      | 25.52 |      |      |       | 1.76  |      |      |      |     |      | 1.51  |       |       |      | 100   | 82           |
| AX1B   | 7-3,5,7                                | 9        | Sp +             | 24.49  |      | 2.21  | 1.75  |      | 7.14 | 9.90  |      |      |       | 29.15 |      | 0.71 |      |     |      | 24.66 |       |       |      | 100   | 48           |
| AX1B   | 7-3,5,7                                | 10       | Sp +             | 24.24  |      | 2.01  | 1.70  |      | 4.64 | 7.79  |      |      |       | 28.14 |      | 0.57 |      |     |      | 23.58 |       | 7.33  |      | 100   | 64           |
| AX1B   | 7-3,5,7                                | 11       | Qz + Sp          | 95.47  |      |       | 0.30  |      |      | 0.68  |      |      |       | 2.36  |      |      |      |     |      | 1.18  |       |       |      | 100   | 107          |
| AX1B   | 7-3,5,7                                | 12       | Qz + Sp + Cal    | 87.66  |      |       |       |      |      | 8.69  |      |      |       | 2.09  |      |      |      |     |      | 1.56  |       |       |      | 100   | 97           |
| AX1B   | 7-3,5,7                                | 13       | Qz + Sp + Cal    | 59.40  |      |       |       |      |      | 38.09 |      |      |       | 1.33  |      |      |      |     |      | 1.18  |       |       |      | 100   | 83           |
| AX1B   | 7-3,5,7                                | 14       | Sp + Qz +        | 43.09  |      | 1.67  | 1.89  |      | 3.35 | 7.19  |      |      |       | 23.59 |      | 0.44 |      |     |      | 18.77 |       |       |      | 100   | 70           |
| AX1B   | 7-3,5,7                                | 15       | Sp + Qz +        | 95.41  |      |       |       |      |      |       |      |      |       | 2.01  |      | 0.66 |      |     |      | 1.92  |       |       |      | 100   | 85           |
| AX1B   | 7-3,5,7                                | 16       | Sp + Qz +        | 62.88  |      | 0.80  | 0.67  |      | 2.16 | 3.12  |      |      |       | 15.82 |      | 0.36 |      |     |      | 14.18 |       |       |      | 100   | 90           |
| AX1B   | 7-3,5,7                                | 17       | Qz               | 100.00 |      |       |       |      |      |       |      |      |       |       |      |      |      |     |      |       |       |       |      | 100   | 116          |
| AX1B   | 7-3,5,7                                | 18       | Sp + Qz +        | 59.27  |      | 1.02  | 0.86  |      | 1.85 | 3.18  |      |      |       | 17.77 |      | 0.28 |      |     |      | 15.87 | -0.11 |       |      | 100   | 104          |
| AX1B   | 7-3,5,7                                | 19       | Qz + Sp +        | 79.85  |      | 0.77  | 1.52  |      | 1.34 | 3.28  |      |      | 1.78  | 7.51  |      | 0.98 |      |     |      | 2.97  |       |       |      | 100   | 77           |
| AX1B   | 7-3,5,7                                | 20       | Cal + Sp         | 11.48  |      |       |       |      | 0.67 | 84.79 |      |      |       | 2.04  |      |      |      |     |      | 1.03  |       |       |      | 100   | 61           |
| AX1B   | 7-3,5,7                                | 21       | Sp +             | 25.86  |      | 3.04  | 2.24  |      | 4.26 | 9.34  |      |      |       | 29.53 |      | 0.51 |      |     |      | 24.91 | -0.07 |       |      | 100   | 76           |
| AX1B   | 7-3,5,7                                | 22       | Sp +             | 32.75  |      | 3.99  | 3.48  |      | 3.96 | 10.45 |      | 0.38 |       | 24.88 |      | 0.57 |      |     |      | 19.48 |       |       |      | 100   | 65           |
| AX1B   | 7-3,5,7                                | 23       | Sp + Cal +       | 46.42  |      |       | 1.47  | 4.48 | 0.63 | 28.46 |      |      |       | 7.26  |      | 0.34 | 1.92 |     |      | 6.83  |       | 2.18  |      | 100   | 74           |
| AX1B   | 7-3,5,7                                | 24       | Sp + Qz +        | 59.76  |      | 1.02  | 5.74  | 2.39 | 1.27 | 2.41  |      |      |       | 12.84 |      | 0.27 | 1.14 |     |      | 11.32 | -0.04 | 1.87  |      | 100   | 85           |
| AX1B   | 7-3,5,7                                | 25       | Qz               | 99.46  |      | 0.54  |       |      |      |       |      |      |       |       |      |      |      |     |      |       |       |       |      | 100   | 119          |
| AX1B   | 7-3,5,7                                | 26       | Sp + Qz +        | 72.36  |      |       | 0.96  | 0.82 | 0.56 | 1.40  |      |      |       | 11.21 |      | 0.36 |      |     |      | 4.72  |       | 7.61  |      | 100   | 72           |
| AX1B   | 8-4,5                                  | 1        | Qz               | 100.00 |      |       |       |      |      |       |      |      |       |       |      |      |      |     |      |       |       |       |      | 100   | 120          |
| AX1B   | 8-4,5                                  | 2        | Brt + Sp +       | 10.44  |      | 0.82  |       |      | 1.24 | 1.16  |      |      |       | 32.77 |      |      | 0.08 |     |      | 3.98  |       | 49.51 |      | 100   | 124          |
| AX1B   | 8-4,5                                  | 3        | Sp +             | 20.30  |      | 2.49  | 1.86  |      | 5.56 | 8.06  |      | 0.34 |       | 31.43 |      | 0.57 |      |     |      | 21.55 |       | 7.86  |      | 100   | 74           |
| AX1B   | 8-4,5                                  | 4        | Sp +             | 24.20  |      | 2.53  | 1.80  |      | 7.03 | 9.08  |      |      |       | 30.60 |      | 0.61 |      |     |      | 22.69 |       | 1.46  |      | 100   | 57           |
| AX1B   | 9-3,4,7                                | 1        | Qz               | 100.00 |      |       |       |      |      |       |      |      |       |       |      |      |      |     |      |       |       |       |      | 100   | 121          |
| AX1B   | 9-3,4,7                                | 2        | Ap + Qz          | 33.65  |      |       |       |      |      | 31.96 | 0.81 |      | 27.95 | 0.97  | 4.66 |      |      |     |      |       |       |       |      | 100   | 115          |
| AX1B   | 9-3,4,7                                | 3        | Ap + Qz          | 28.42  |      |       |       |      |      | 35.16 | 0.80 |      | 29.63 | 0.99  | 5.00 |      |      |     |      |       |       |       |      | 100   | 113          |
| AX1B   | 9-3,4,7                                | 4        | Ap + Qz          | 60.84  |      |       |       |      |      | 17.93 |      |      | 15.30 | 1.77  | 3.64 |      |      |     |      | 0.53  |       |       |      | 100   | 109          |
| AX1B   | 9-3,4,7                                | 5        | Sp + Ap +        | 33.78  |      | 2.27  | 1.13  |      | 3.01 | 7.29  |      |      | 4.31  | 27.62 |      | 0.75 |      |     |      | 19.84 |       |       |      | 100   | 31           |
| AX1B   | 9-3,4,7                                | 6        | FeOhy +          | 25.97  |      |       | 72.01 |      |      | 0.61  |      |      |       |       |      |      |      |     | 1.41 |       |       |       |      | 100   | 91           |
| AX1B   | 9-3,4,7                                | 7        | Ap + Qz          | 27.25  |      |       |       |      |      | 35.60 | 0.84 |      | 30.71 | 1.02  | 4.58 |      |      |     |      |       |       |       |      | 100   | 115          |
| AX1B   | 9-3,4,7                                | 8        | Ap + Qz          | 33.54  |      |       |       |      |      | 33.07 | 0.62 |      | 26.69 | 1.11  | 4.97 |      |      |     |      |       |       |       |      | 100   | 112          |
| AX1B   | 9-3,4,7                                | 9        | Ap + Qz          | 33.05  |      |       |       |      |      | 33.27 | 0.66 |      | 27.55 | 1.01  | 4.47 |      |      |     |      |       |       |       |      | 100   | 116          |
| AX1B   | 9-5                                    | 1        | Qz               | 100.00 |      |       |       |      |      |       |      |      |       |       |      |      |      |     |      |       |       |       |      | 100   | 119          |
| AX1B   | 9-5                                    | 2        | Sp +             | 27.55  |      | 3.55  | 2.88  |      | 4.60 | 9.49  |      |      |       | 28.22 |      | 0.62 |      |     |      | 23.21 | -0.11 |       |      | 100   | 63           |
| AX1B   | 9-5                                    | 3        | Sp +             | 25.45  | 0.56 | 3.36  | 2.54  |      | 5.16 | 9.30  |      | 0.43 |       | 28.89 |      | 0.57 |      |     |      | 23.76 | -0.01 |       |      | 100   | 72           |
| AX1B   | 9-5                                    | 4        | Sp + Qz +        | 74.62  |      | 1.87  | 1.54  |      | 2.06 | 4.14  |      |      |       | 7.90  |      | 0.34 |      |     |      | 7.52  |       |       |      | 100   | 99           |
| AX1B   | 9-5                                    | 5        | FeOhy + Qz       | 69.66  |      |       | 29.28 |      |      | 0.35  |      |      |       |       |      | 0.20 |      |     | 0.51 |       |       |       |      | 100   | 122          |
| AX1B   | 11-6                                   | 1        | Sp +             | 21.43  |      | 2.60  | 1.71  |      | 3.77 | 6.65  |      | 0.44 |       | 31.44 |      | 0.52 |      |     |      | 26.12 |       | 0.80  | 4.52 | 100   | 96           |
| AX1B   | 11-6                                   | 2        | Qz               | 100.00 |      |       |       |      |      |       |      |      |       |       |      |      |      |     |      |       |       |       |      | 100   | 113          |
| AX1B   | 11-6                                   | 3        | Cal + Qz         | 34.85  |      |       |       |      | 0.68 | 64.47 |      |      |       |       |      |      |      |     |      |       |       |       |      | 100   | 67           |
| AX1B   | 11-6                                   | 4        | Cal +            | 7.79   |      |       |       |      | 1.15 | 91.06 |      |      |       |       |      |      |      |     |      |       |       |       |      | 100   | 57           |
| AX1B   | 11-6                                   | 5        | FeOhy + Qz + Cal | 29.95  |      |       | 59.23 |      |      | 9.21  |      |      |       |       |      |      |      |     | 1.61 |       |       |       |      | 100   | 88           |
| AX1B   | 11-6                                   | 6        | FeOhy + Qz + Cal | 22.25  |      | 1.14  | 65.81 | 0.48 |      | 9.47  |      |      |       |       |      |      |      |     | 0.85 |       |       |       |      | 100   | 83           |
| AX1B   | 11-6                                   | 7        | Qz               | 99.51  |      |       |       |      |      | 0.49  |      |      |       |       |      |      |      |     |      |       |       |       |      | 100   | 111          |

Supplementary Material S7: SEM-BSE images and Electron Dispersive Spectroscopy (EDS) mineral analyses for sample AX1C (Zoom).



Figure S7.1: AX1 C thin section showing respective sites taken for mineral chemical analyses (EDS) via Scanning Electron Microscope (SEM) (zooms in Supplementary Material S3).

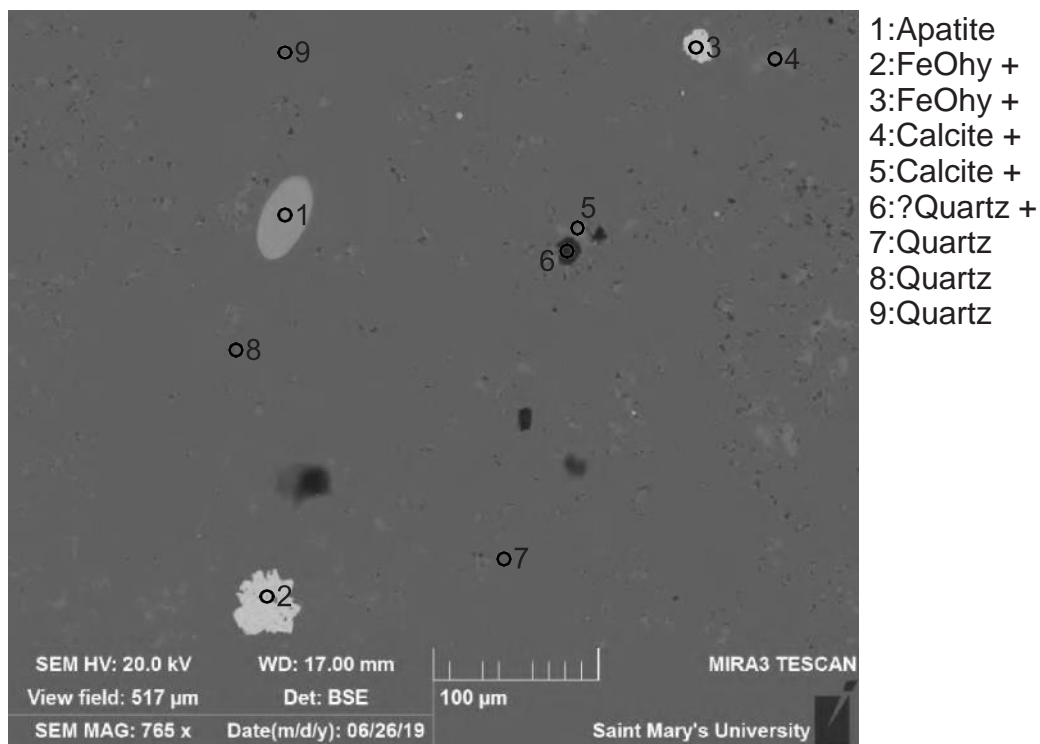

Figure S7.2: AX1 C (SEM) site 2a (Table S14.1).

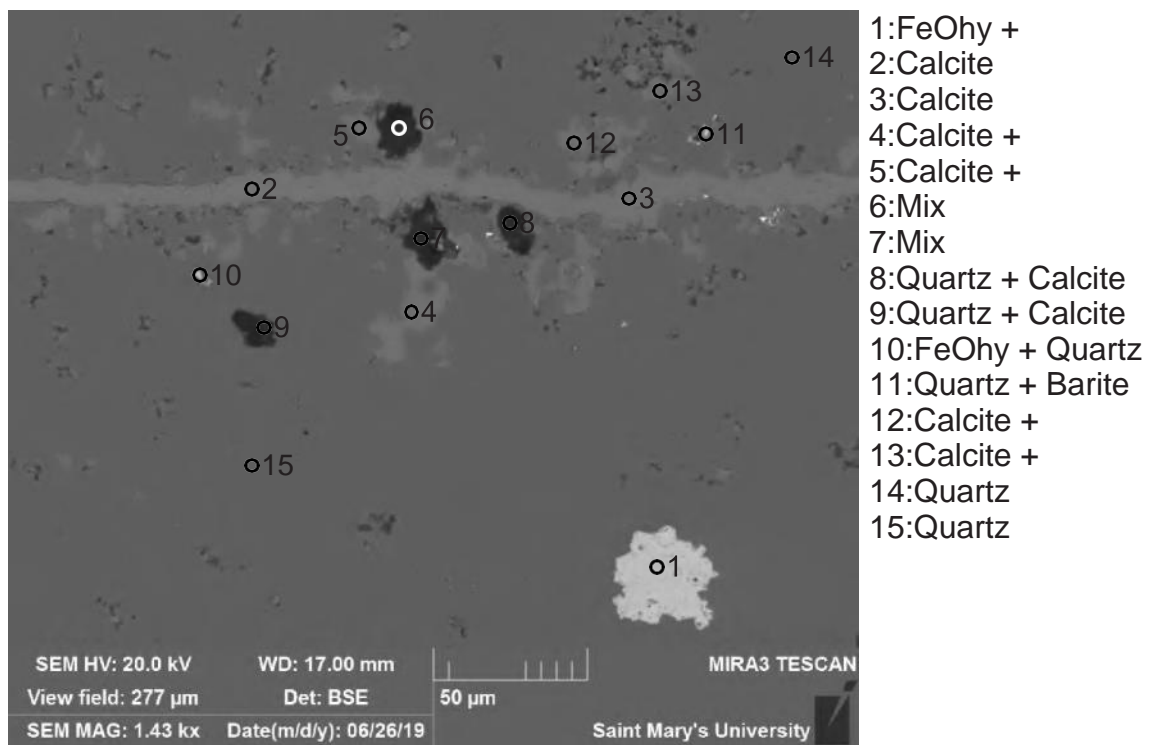

Figure S7.3: AX1 C (SEM) site 3a (Table S14.1).



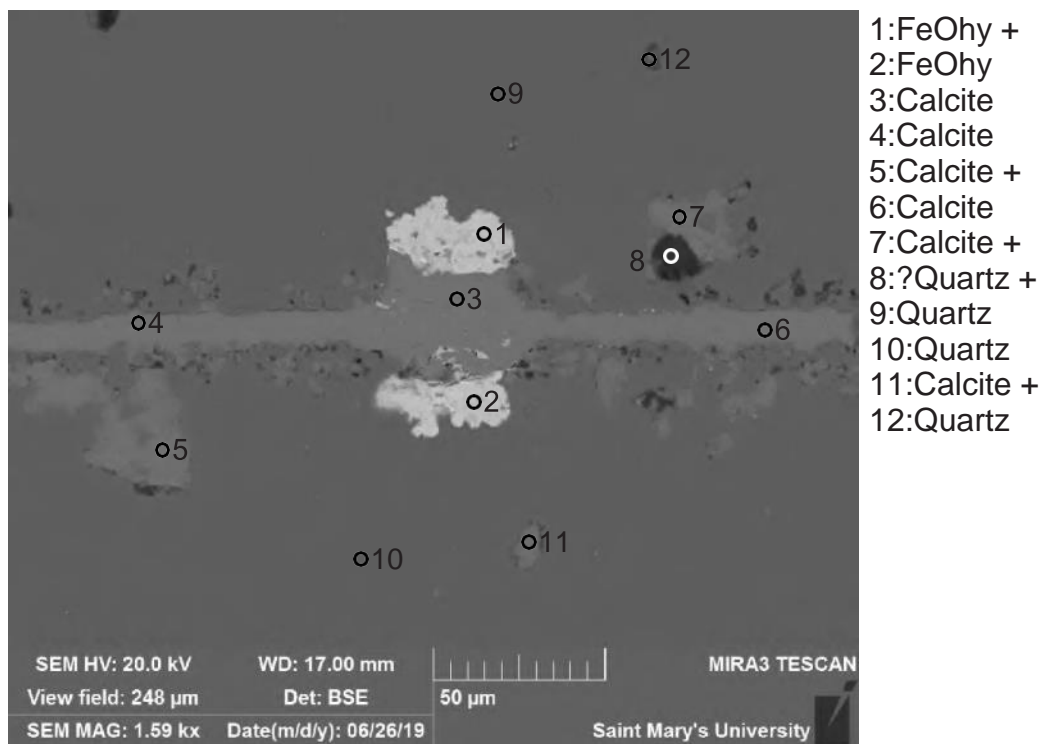

Figure S7.4: AX1 C (SEM) site 4a (Table S14.1).

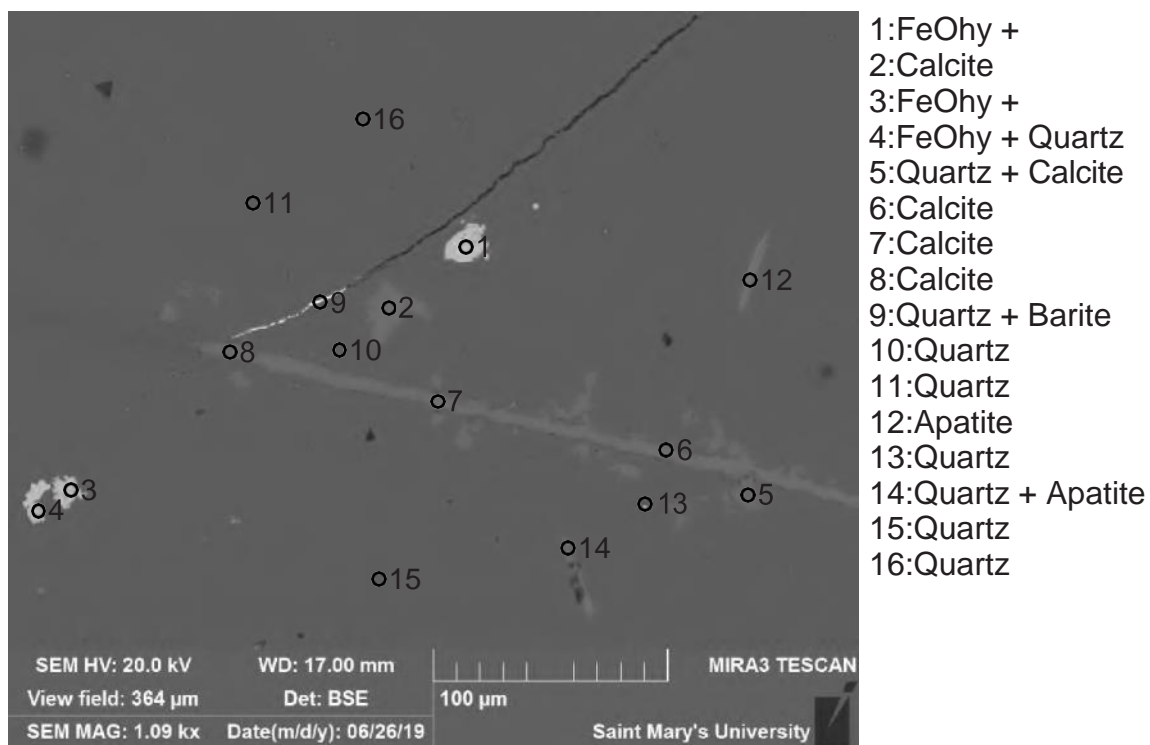

Figure S7.5: AX1 C (SEM) site 5a (Table S14.1).

Table S7.1: Scanning Electron Microscope (SEM) mineral chemical analyses (EDS) of AX1 C,

| Sample | Site | Position | Mineral   | SiO2   | Al2O3 | FeO   | MnO  | MgO  | CaO   | Na2O | K2O  | P2O5  | SO3   | Cl   | CuO | ZnO  | BaO   | Total | Actual Total |
|--------|------|----------|-----------|--------|-------|-------|------|------|-------|------|------|-------|-------|------|-----|------|-------|-------|--------------|
| AX1 C  | 2a   | 1        | Ap        |        |       |       |      |      | 54.68 | 1.21 |      | 44.11 |       |      |     |      |       | 100   | 96           |
| AX1 C  | 2a   | 2        | FeOhy +   | 6.72   |       | 93.28 |      |      |       |      |      |       |       |      |     |      |       | 100   | 77           |
| AX1 C  | 2a   | 3        | FeOhy +   | 7.09   |       | 92.91 |      |      |       |      |      |       |       |      |     |      |       | 100   | 75           |
| AX1 C  | 2a   | 4        | Cal +     | 25.87  |       |       |      |      | 74.13 |      |      |       |       |      |     |      |       | 100   | 66           |
| AX1 C  | 2a   | 5        | Cal +     | 25.04  |       |       |      |      | 74.96 |      |      |       |       |      |     |      |       | 100   | 66           |
| AX1 C  | 2a   | 6        | ?Qz +     | 66.65  | 7.19  | 3.98  |      | 3.03 | 15.32 | 1.46 | 1.28 |       |       | 1.09 |     |      |       | 100   | 27           |
| AX1 C  | 2a   | 7        | Qz        | 100.00 |       |       |      |      |       |      |      |       |       |      |     |      |       | 100   | 115          |
| AX1 C  | 2a   | 8        | Qz        | 100.00 |       |       |      |      |       |      |      |       |       |      |     |      |       | 100   | 117          |
| AX1 C  | 2a   | 9        | Qz        | 100.00 |       |       |      |      |       |      |      |       |       |      |     |      |       | 100   | 113          |
| AX1 C  | 3a   | 1        | FeOhy +   | 6.77   |       | 92.29 | 0.93 |      |       |      |      |       |       |      |     |      |       | 100   | 75           |
| AX1 C  | 3a   | 2        | Cal       | 1.40   |       |       |      |      | 54.60 |      |      |       |       |      |     |      |       | 56    | 55           |
| AX1 C  | 3a   | 3        | Cal       | 2.14   |       |       |      |      | 53.86 |      |      |       |       |      |     |      |       | 56    | 56           |
| AX1 C  | 3a   | 4        | Cal +     | 16.56  |       |       |      |      | 83.44 |      |      |       |       |      |     |      |       | 100   | 61           |
| AX1 C  | 3a   | 5        | Cal +     | 16.27  |       |       |      |      | 83.73 |      |      |       |       |      |     |      |       | 100   | 60           |
| AX1 C  | 3a   | 6        | Mix       | 64.69  | 7.56  | 4.48  |      | 3.52 | 12.14 |      | 1.88 |       | 2.75  | 1.59 |     | 1.40 |       | 100   | 21           |
| AX1 C  | 3a   | 7        | Mix       | 63.05  | 8.75  | 3.62  |      | 4.02 | 17.09 |      | 1.66 |       |       | 1.81 |     |      |       | 100   | 20           |
| AX1 C  | 3a   | 8        | Qz + Cal  | 95.16  |       | 1.01  |      |      | 3.83  |      |      |       |       |      |     |      |       | 100   | 49           |
| AX1 C  | 3a   | 9        | Qz + Cal  | 88.40  |       | 1.83  |      |      | 9.77  |      |      |       |       |      |     |      |       | 100   | 21           |
| AX1 C  | 3a   | 10       | FeOhy + Q | 43.47  |       | 55.13 | 0.64 |      | 0.75  |      |      |       |       |      |     |      |       | 100   | 92           |
| AX1 C  | 3a   | 11       | Qz + Brt  | 66.03  |       |       |      |      | 3.00  |      |      |       | 11.82 |      |     |      | 19.15 | 100   | 127          |
| AX1 C  | 3a   | 12       | Cal +     | 10.08  |       |       |      |      | 89.92 |      |      |       |       |      |     |      |       | 100   | 58           |
| AX1 C  | 3a   | 13       | Cal +     | 8.46   |       |       |      |      | 91.54 |      |      |       |       |      |     |      |       | 100   | 59           |
| AX1 C  | 3a   | 14       | Qz        | 100.00 |       |       |      |      |       |      |      |       |       |      |     |      |       | 100   | 114          |
| AX1 C  | 3a   | 15       | Qz        | 100.00 |       |       |      |      |       |      |      |       |       |      |     |      |       | 100   | 112          |
| AX1 C  | 4a   | 1        | FeOhy +   | 5.85   |       | 93.32 |      |      | 0.82  |      |      |       |       |      |     |      |       | 100   | 73           |
| AX1 C  | 4a   | 2        | FeOhy     | 7.30   |       | 90.32 | 1.19 |      | 1.19  |      |      |       |       |      |     |      |       | 100   | 73           |
| AX1 C  | 4a   | 3        | Cal       | 0.78   |       |       |      |      | 55.22 |      |      |       |       |      |     |      |       | 56    | 55           |
| AX1 C  | 4a   | 4        | Cal       | 1.05   |       |       |      |      | 54.95 |      |      |       |       |      |     |      |       | 56    | 55           |
| AX1 C  | 4a   | 5        | Cal +     | 8.07   |       |       |      |      | 91.93 |      |      |       |       |      |     |      |       | 100   | 58           |
| AX1 C  | 4a   | 6        | Cal       | 1.05   |       |       |      |      | 54.95 |      |      |       |       |      |     |      |       | 56    | 56           |
| AX1 C  | 4a   | 7        | Cal +     | 7.95   |       |       |      |      | 92.05 |      |      |       |       |      |     |      |       | 100   | 57           |
| AX1 C  | 4a   | 8        | ?Qz +     | 67.72  | 7.65  | 3.96  |      | 3.46 | 10.14 | 1.61 | 1.73 |       | 2.05  | 1.67 |     |      |       | 100   | 34           |
| AX1 C  | 4a   | 9        | Qz        | 100.00 |       |       |      |      |       |      |      |       |       |      |     |      |       | 100   | 113          |

Table S7.1: Scanning Electron Microscope (SEM) mineral chemical analyses (EDS) of AX1 C,

| Sample | Site | Position | Mineral   | SiO2   | Al2O3 | FeO   | MnO  | MgO | CaO   | Na2O | K2O | P2O5  | SO3  | Cl | CuO  | ZnO | BaO  | Total | Actual Total |
|--------|------|----------|-----------|--------|-------|-------|------|-----|-------|------|-----|-------|------|----|------|-----|------|-------|--------------|
| AX1 C  | 4a   | 10       | Qz        | 100.00 |       |       |      |     |       |      |     |       |      |    |      |     |      | 100   | 113          |
| AX1 C  | 4a   | 11       | Cal +     | 11.31  |       |       |      |     | 88.69 |      |     |       |      |    |      |     |      | 100   | 60           |
| AX1 C  | 4a   | 12       | Qz        | 100.00 |       |       |      |     |       |      |     |       |      |    |      |     |      | 100   | 109          |
| AX1 C  | 5a   | 1        | FeOhy +   | 6.01   |       | 91.63 | 1.72 |     | 0.65  |      |     |       |      |    |      |     |      | 100   | 74           |
| AX1 C  | 5a   | 2        | Cal       | 1.27   |       |       |      |     | 54.73 |      |     |       |      |    |      |     |      | 56    | 55           |
| AX1 C  | 5a   | 3        | FeOhy +   | 10.00  |       | 86.90 | 0.84 |     | 0.95  |      |     |       |      |    | 1.30 |     |      | 100   | 72           |
| AX1 C  | 5a   | 4        | FeOhy + Q | 26.66  |       | 71.69 | 0.97 |     | 0.68  |      |     |       |      |    |      |     |      | 100   | 84           |
| AX1 C  | 5a   | 5        | Qz + Cal  | 68.93  |       |       |      |     | 31.07 |      |     |       |      |    |      |     |      | 100   | 88           |
| AX1 C  | 5a   | 6        | Cal       | 2.75   |       |       |      |     | 53.25 |      |     |       |      |    |      |     |      | 56    | 56           |
| AX1 C  | 5a   | 7        | Cal       | 2.37   |       |       |      |     | 53.63 |      |     |       |      |    |      |     |      | 56    | 55           |
| AX1 C  | 5a   | 8        | Cal       | 2.15   |       |       |      |     | 53.85 |      |     |       |      |    |      |     |      | 56    | 52           |
| AX1 C  | 5a   | 9        | Qz + Brt  | 88.80  |       |       |      |     |       |      |     |       | 4.45 |    |      |     | 6.75 | 100   | 94           |
| AX1 C  | 5a   | 10       | Qz        | 100.00 |       |       |      |     |       |      |     |       |      |    |      |     |      | 100   | 113          |
| AX1 C  | 5a   | 11       | Qz        | 100.00 |       |       |      |     |       |      |     |       |      |    |      |     |      | 100   | 113          |
| AX1 C  | 5a   | 12       | Ap        | 19.65  |       |       |      |     | 43.76 | 1.16 |     | 33.67 | 1.76 |    |      |     |      | 100   | 94           |
| AX1 C  | 5a   | 13       | Qz        | 99.29  |       | 0.71  |      |     |       |      |     |       |      |    |      |     |      | 100   | 114          |
| AX1 C  | 5a   | 14       | Qz + Ap   | 54.61  |       |       |      |     | 24.46 | 0.53 |     | 20.40 |      |    |      |     |      | 100   | 102          |
| AX1 C  | 5a   | 15       | Qz        | 100.00 |       |       |      |     |       |      |     |       |      |    |      |     |      | 100   | 114          |
| AX1 C  | 5a   | 16       | Qz        | 100.00 |       |       |      |     |       |      |     |       |      |    |      |     |      | 100   | 113          |

Supplementary Material S8: SEM-BSE images and Electron Dispersive Spectroscopy (EDS) mineral analyses for sample AX2 (Zoom).



Figure S8.1: AX2 thin section showing respective sites taken for mineral chemical analyses (EDS) via Scanning Electron Microscope (SEM) (zooms in Supplementary Material S4).

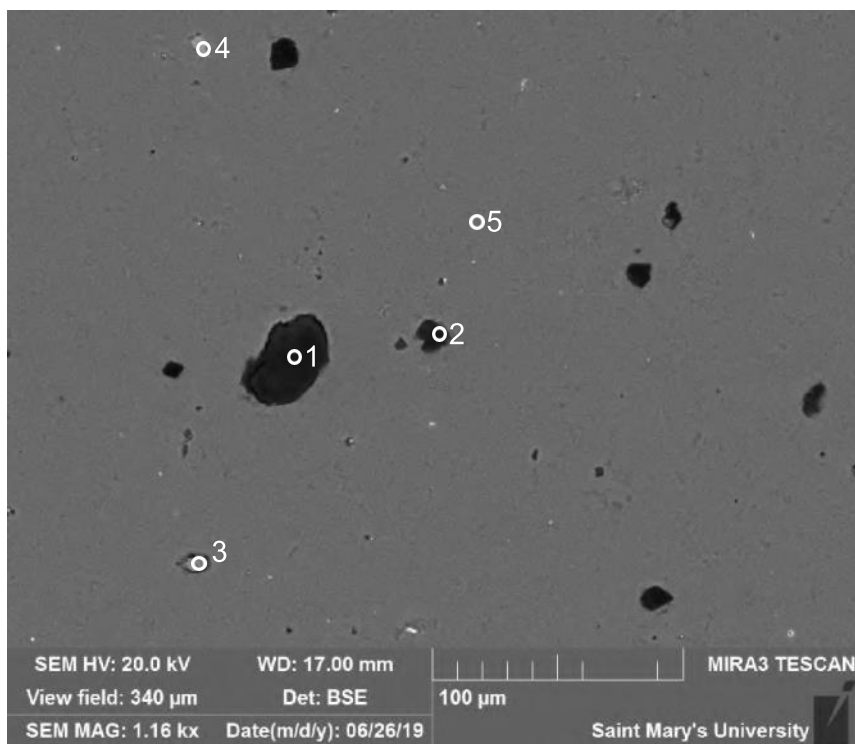

- 1:Hole
- 2:Hole
- 3:Quartz +
- 4:Quartz +
- 5:Quartz

Figure S8.1: AX 2 (SEM) Site 5, Position 3 from Supplementary Material S4 (AX 2), (Table S8.1). Porosity (1-2) present in the quartz host (5).

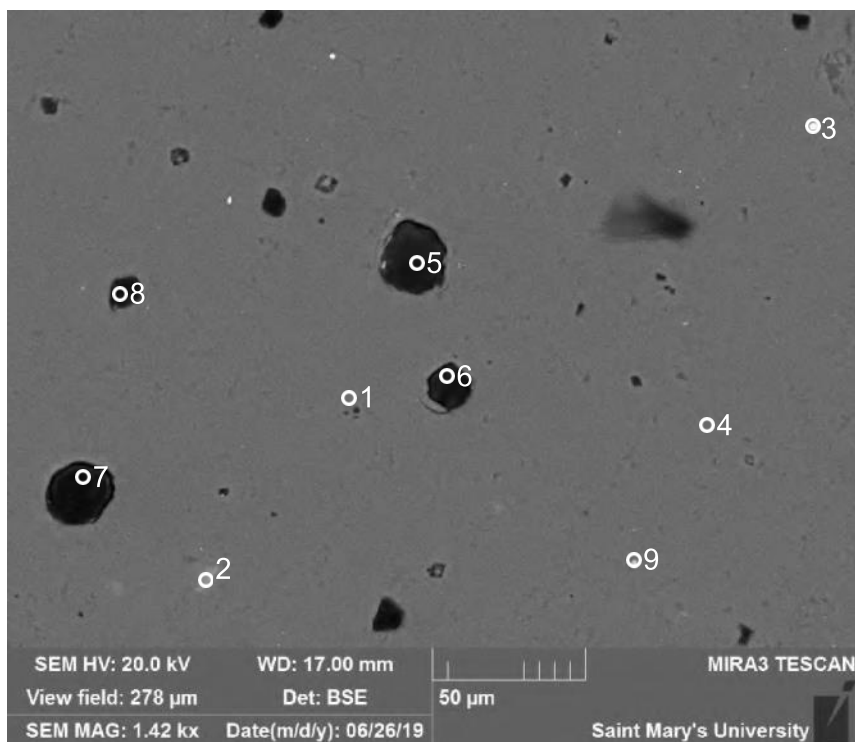

- 1:Quartz
- 2:Quartz + Apatite
- 3:Quartz + FeOhy
- 4:Quartz
- 5:Hole
- 6:Hole
- 7:Hole
- 8:Hole
- 9:Quartz + FeOhy

Figure S8.2: AX 2 (SEM) Site 5, Position 2 from Supplementary Material S4 (AX 2), (Table S8.1). Blebs of goethite (3,9) and apatite (2) in quartz (1). Some porosity (5-7).



Table S8.1: Scanning Electron Microscope (SEM) mineral chemical analyses (EDS) of selected sites and positions of sample AX 2 .

| Sample | Site +<br>Position<br>from<br>Appendix<br>A4 | Position | Mineral    | SiO <sub>2</sub> | TiO <sub>2</sub> | Al <sub>2</sub> O <sub>3</sub> | FeO   | MgO  | CaO   | Na <sub>2</sub> O | K <sub>2</sub> O | P <sub>2</sub> O <sub>5</sub> | SO <sub>3</sub> | Cl   | ZnO  | Total | Actual<br>Total |
|--------|----------------------------------------------|----------|------------|------------------|------------------|--------------------------------|-------|------|-------|-------------------|------------------|-------------------------------|-----------------|------|------|-------|-----------------|
| AX 2   | 5 - 3                                        | 1        | Hole       | 65.74            | 1.10             | 9.12                           | 3.64  | 4.59 | 8.44  | 2.80              | 1.40             |                               | 2.33            | 0.84 |      | 100   | 43              |
| AX 2   | 5 - 3                                        | 2        | Hole       | 88.79            |                  |                                | 2.53  |      | 7.43  |                   | 0.68             |                               |                 | 0.56 |      | 100   | 69              |
| AX 2   | 5 - 3                                        | 3        | Qz +       | 97.54            |                  |                                | 1.81  |      | 0.27  |                   | 0.38             |                               |                 |      |      | 100   | 184             |
| AX 2   | 5 - 3                                        | 4        | Qz +       | 91.95            |                  |                                | 0.39  |      | 7.66  |                   |                  |                               |                 |      |      | 100   | 141             |
| AX 2   | 5 - 3                                        | 5        | Qz         | 100.00           |                  |                                |       |      |       |                   |                  |                               |                 |      |      | 100   | 161             |
| AX 2   | 5 - 2                                        | 1        | Qz         | 100.00           |                  |                                |       |      |       |                   |                  |                               |                 |      |      | 100   | 159             |
| AX 2   | 5 - 2                                        | 2        | Qz + Ap    | 58.55            |                  |                                |       |      | 23.15 | 0.56              |                  | 17.74                         |                 |      |      | 100   | 144             |
| AX 2   | 5 - 2                                        | 3        | Qz + FeOhy | 64.39            |                  |                                | 35.16 |      | 0.45  |                   |                  |                               |                 |      |      | 100   | 141             |
| AX 2   | 5 - 2                                        | 4        | Qz         | 100.00           |                  |                                |       |      |       |                   |                  |                               |                 |      |      | 100   | 162             |
| AX 2   | 5 - 2                                        | 5        | Hole       | 54.22            |                  | 10.97                          | 16.21 | 3.28 | 13.14 | 1.32              | 0.86             |                               |                 |      |      | 100   | 70              |
| AX 2   | 5 - 2                                        | 6        | Hole       | 88.65            |                  |                                | 2.46  |      | 4.83  |                   | 0.70             |                               | 2.25            | 0.91 | 0.20 | 100   | 69              |
| AX 2   | 5 - 2                                        | 7        | Hole       | 66.34            |                  | 7.25                           | 2.97  | 3.10 | 8.39  |                   | 1.47             |                               | 6.11            | 4.36 |      | 100   | 25              |
| AX 2   | 5 - 2                                        | 8        | Hole       | 88.00            | 1.12             |                                | 2.82  |      | 6.93  |                   | 1.12             |                               |                 |      |      | 100   | 40              |
| AX 2   | 5 - 2                                        | 9        | Qz + FeOhy | 82.29            |                  |                                | 17.17 |      |       | 0.54              |                  |                               |                 |      |      | 100   | 151             |

Supplementary Material S9: SEM-BSE images and Electron Dispersive Spectroscopy (EDS) mineral analyses for sample AX3 (Zoom).



Figure S9.1: AX3 thin section showing respective sites taken for mineral chemical analyses (EDS) via Scanning Electron Microscope (SEM) (zooms in Supplementary Material S5).

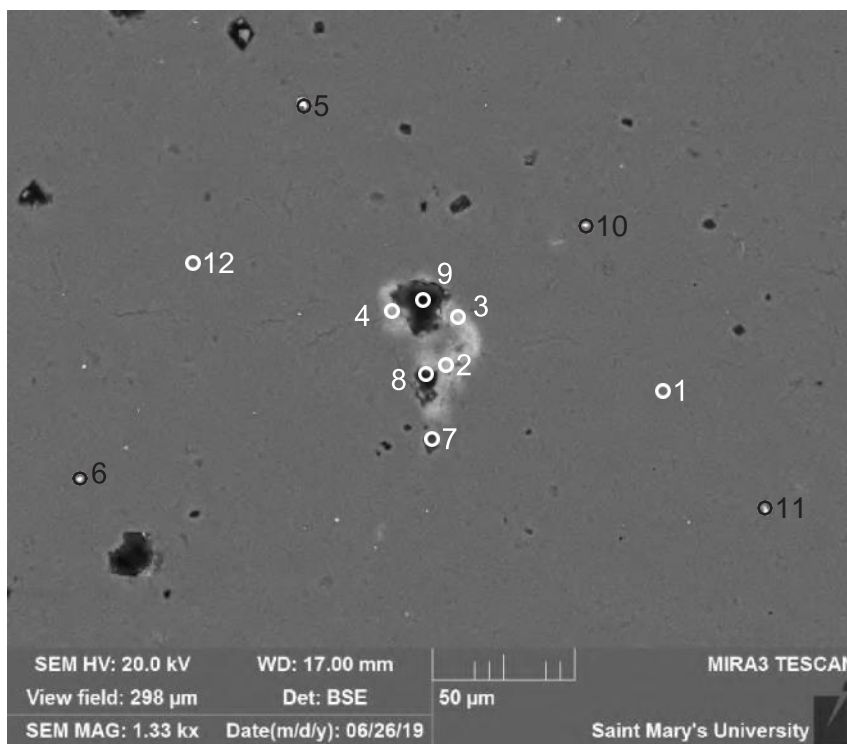

- 1:Quartz
- 2:Apatite + Quartz
- 3:Apatite + Quartz
- 4:Apatite + Quartz
- 5:Pyrite + Quartz
- 6:Quartz + Feohy
- 7:Mix
- 8:Hole
- 9:Hole
- 10:TiO<sub>2</sub> + Quartz
- 11:Quartz + Feohy
- 12:Quartz

Figure S9.2: AX 3 (SEM) Site 3, Position 3 from Supplementary Material S5 (AX 3), (Table S9.1).

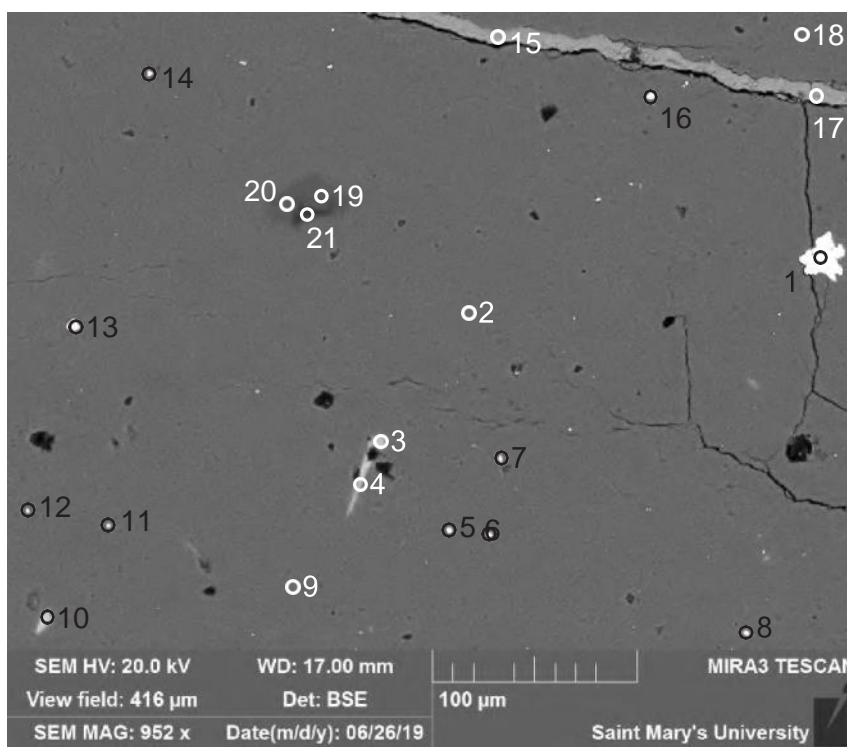

- 1:Pyrite
- 2:Quartz
- 3:Apatite
- 4:Apatite + Quartz
- 5:Pyrite + Quartz
- 6:Pyrite + Quartz
- 7:Pyrite + Quartz
- 8:Quartz + Feohy
- 9:Quartz
- 10:Apatite
- 11:Pyrrhotite + Quartz
- 12:Pyrite + Quartz
- 13:Pyrite + Quartz
- 14:Pyrite + Quartz
- 15:Calcite
- 16:Pyrite + Quartz
- 17:Calcite
- 18:Quartz
- 19:Quartz
- 20:Quartz
- 21:Quartz

Figure S9.3: AX 3 (SEM) Site 3, Position 6 from Supplementary Material S5 (AX 3), (Table S9.1).

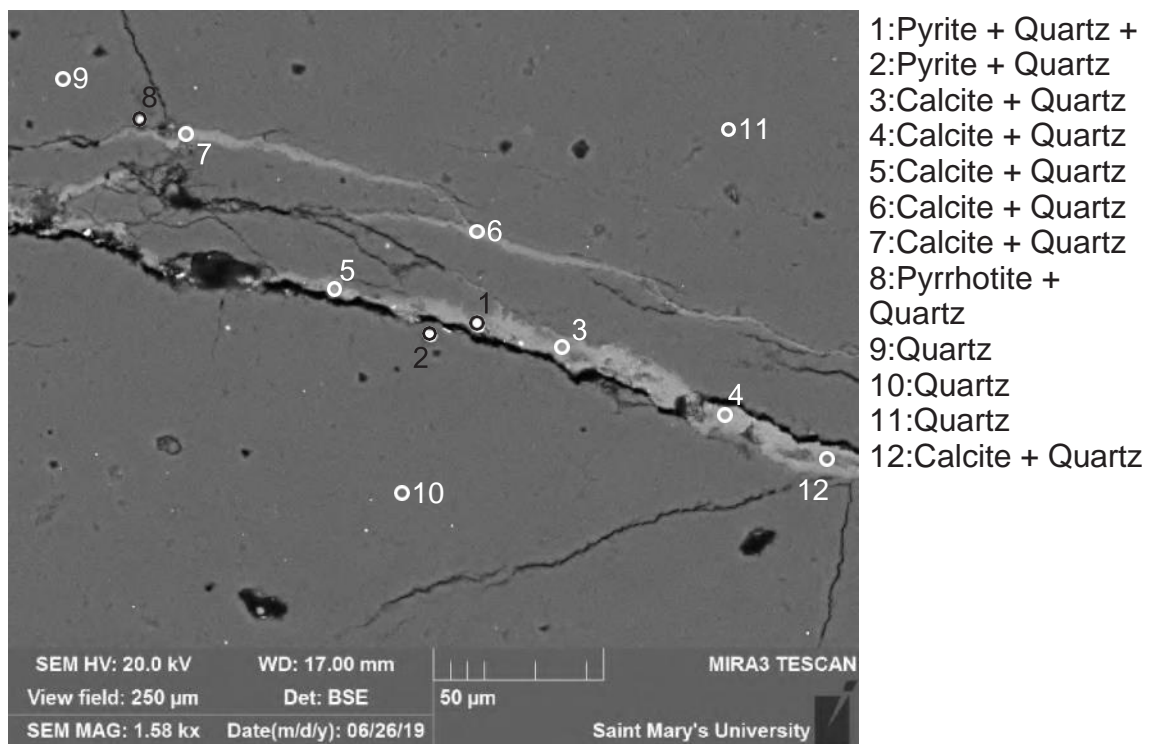

Figure S9.4: AX 3 (SEM) Site 4, Position 6 from Supplementary Material S5 (AX 3), (Table S9.1).

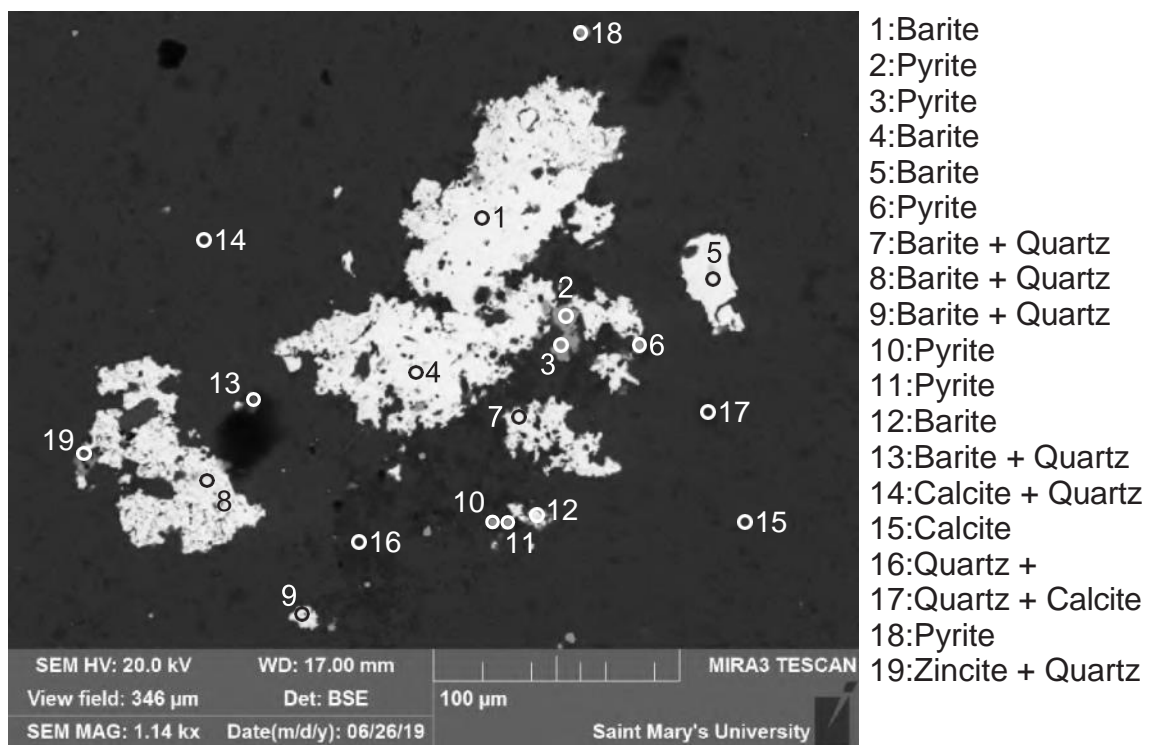

Figure S9.5: AX 3 (SEM) Site 14, Position 1-7 from Supplementary Material S5 (AX 3), (Table S9.1).

Table S9.1: Scanning Electron Microscope (SEM) mineral chemical analyses (EDS) of selected sites and positions of sample AX 3.

| Sample | Site +<br>Position<br>from<br>Appendix<br>x A5 | Position | Mineral    | SiO2   | TiO2  | Al2O3 | FeO   | MnO  | MgO  | CaO   | Na2O | K2O  | P2O5  | SO3   | Cl   | CoO  | NiO  | CuO  | ZnO  | Rb2O | MoO3  | BaO | WO3  | Total | Actual<br>Total |     |
|--------|------------------------------------------------|----------|------------|--------|-------|-------|-------|------|------|-------|------|------|-------|-------|------|------|------|------|------|------|-------|-----|------|-------|-----------------|-----|
| AX3    | 3 - 3                                          | 1        | Qz         | 100.00 |       |       |       |      |      |       |      |      |       |       |      |      |      |      |      |      |       |     |      | 100   | 118             |     |
| AX3    | 3 - 3                                          | 2        | Ap + Qz    | 39.58  |       |       |       |      |      | 33.48 | 0.72 |      | 26.22 |       |      |      |      |      |      |      |       |     |      |       | 100             | 103 |
| AX3    | 3 - 3                                          | 3        | Ap + Qz    | 29.43  |       |       |       |      |      | 39.40 | 0.78 |      | 30.39 |       |      |      |      |      |      |      |       |     |      |       | 100             | 105 |
| AX3    | 3 - 3                                          | 4        | Ap + Qz    | 66.56  |       |       |       |      |      | 17.77 | 0.56 |      | 15.11 |       |      |      |      |      |      |      |       |     |      |       | 100             | 109 |
| AX3    | 3 - 3                                          | 5        | Py + Qz    | 18.59  |       |       | 23.72 | 0.36 |      |       |      |      |       | 55.78 |      |      | 0.51 | 1.04 |      |      |       |     |      |       | 100             | 184 |
| AX3    | 3 - 3                                          | 6        | Qz + Feohy | 71.74  |       |       | 27.40 |      |      |       |      |      |       |       |      |      |      | 0.63 | 0.23 |      |       |     |      |       | 100             | 118 |
| AX3    | 3 - 3                                          | 7        | Mix        | 80.11  | 0.70  | 5.51  | 5.46  |      |      | 2.79  |      | 0.47 |       |       | 0.60 |      |      |      | 1.54 |      | 2.81  |     |      |       | 100             | 86  |
| AX3    | 3 - 3                                          | 8        | Hole       | 59.47  |       |       | 3.66  |      |      | 13.77 |      |      | 7.04  | 7.16  | 0.96 |      |      |      | 7.94 |      |       |     |      |       | 100             | 49  |
| AX3    | 3 - 3                                          | 9        | Hole       | 57.93  |       | 7.79  |       |      |      | 7.37  |      |      |       |       |      |      |      |      | 4.53 |      | 22.38 |     |      |       | 100             | 7   |
| AX3    | 3 - 3                                          | 10       | TiO2 + Qz  | 47.27  | 52.73 |       |       |      |      |       |      |      |       |       |      |      |      |      |      |      |       |     |      |       | 100             | 126 |
| AX3    | 3 - 3                                          | 11       | Qz + Feohy | 71.42  |       |       | 28.58 |      |      |       |      |      |       |       |      |      |      |      |      |      |       |     |      |       | 100             | 108 |
| AX3    | 3 - 3                                          | 12       | Qz         | 100.00 |       |       |       |      |      |       |      |      |       |       |      |      |      |      |      |      |       |     |      |       | 100             | 116 |
| AX3    | 3 - 6                                          | 1        | Py         | 1.03   |       |       | 35.43 |      |      |       |      |      |       | 63.54 |      |      |      |      |      |      |       |     |      |       | 100             | 188 |
| AX3    | 3 - 6                                          | 2        | Qz         | 100.00 |       |       |       |      |      |       |      |      |       |       |      |      |      |      |      |      |       |     |      |       | 100             | 116 |
| AX3    | 3 - 6                                          | 3        | Ap         |        |       |       |       |      |      | 45.93 | 1.01 |      | 37.99 | 3.40  |      |      |      |      |      | 4.73 |       |     | 6.93 |       | 100             | 106 |
| AX3    | 3 - 6                                          | 4        | Ap + Qz    | 33.90  |       |       |       |      |      | 34.66 | 1.10 |      | 28.16 | 2.17  |      |      |      |      |      |      |       |     |      |       | 100             | 108 |
| AX3    | 3 - 6                                          | 5        | Py + Qz    | 28.71  |       |       | 27.95 |      |      |       |      |      |       | 40.64 |      | 1.18 | 0.81 | 0.71 |      |      |       |     |      |       | 100             | 167 |
| AX3    | 3 - 6                                          | 6        | Py + Qz    | 17.11  |       |       | 25.66 | 0.44 |      |       |      |      |       | 54.87 |      |      | 0.60 | 1.30 |      |      |       |     |      |       | 100             | 192 |
| AX3    | 3 - 6                                          | 7        | Py + Qz    | 19.00  |       |       | 24.02 |      |      |       |      |      |       | 56.98 |      |      |      |      |      |      |       |     |      |       | 100             | 202 |
| AX3    | 3 - 6                                          | 8        | Qz + Feohy | 41.15  |       |       | 56.92 | 0.65 |      | 0.68  |      |      |       |       | 0.59 |      |      |      |      |      |       |     |      |       | 100             | 107 |
| AX3    | 3 - 6                                          | 9        | Qz         | 100.00 |       |       |       |      |      |       |      |      |       |       |      |      |      |      |      |      |       |     |      |       | 100             | 118 |
| AX3    | 3 - 6                                          | 10       | Ap         |        |       |       |       |      |      | 45.98 | 1.06 |      | 38.44 | 3.33  | 0.33 |      |      |      |      | 4.42 |       |     | 6.44 |       | 100             | 109 |
| AX3    | 3 - 6                                          | 11       | Po + Qz    | 29.29  | 1.77  |       | 48.11 | 0.77 |      | 0.86  | 0.55 |      |       | 17.02 |      |      | 0.77 | 0.85 |      |      |       |     |      |       | 100             | 115 |
| AX3    | 3 - 6                                          | 12       | Py + Qz    | 29.91  |       |       | 32.19 | 0.35 |      | 0.39  |      |      |       | 33.24 |      | 1.79 | 1.15 | 0.99 |      |      |       |     |      |       | 100             | 150 |
| AX3    | 3 - 6                                          | 13       | Py + Qz    | 2.93   |       |       | 39.65 |      |      | 0.46  |      |      |       | 56.96 |      |      |      |      |      |      |       |     |      |       | 100             | 164 |
| AX3    | 3 - 6                                          | 14       | Py + Qz    | 32.16  |       |       | 22.08 |      |      |       |      |      |       | 44.58 |      |      | 0.40 | 0.78 |      |      |       |     |      |       | 100             | 172 |
| AX3    | 3 - 6                                          | 15       | Cal        | 1.44   |       |       |       |      |      | 54.56 |      |      |       |       |      |      |      |      |      |      |       |     |      |       | 56              | 56  |
| AX3    | 3 - 6                                          | 16       | Py + Qz    | 11.76  |       |       | 27.30 |      |      |       |      |      |       | 58.28 |      | 1.01 | 1.00 | 0.65 |      |      |       |     |      |       | 100             | 189 |
| AX3    | 3 - 6                                          | 17       | Cal        | 1.15   |       |       |       |      | 0.63 | 54.21 |      |      |       |       |      |      |      |      |      |      |       |     |      |       | 56              | 57  |
| AX3    | 3 - 6                                          | 18       | Qz         | 100.00 |       |       |       |      |      |       |      |      |       |       |      |      |      |      |      |      |       |     |      |       | 100             | 117 |
| AX3    | 3 - 6                                          | 19       | Qz         | 100.00 |       |       |       |      |      |       |      |      |       |       |      |      |      |      |      |      |       |     |      |       | 100             | 111 |
| AX3    | 3 - 6                                          | 20       | Qz         | 100.00 |       |       |       |      |      |       |      |      |       |       |      |      |      |      |      |      |       |     |      |       | 100             | 109 |
| AX3    | 3 - 6                                          | 21       | Qz         | 98.20  |       |       |       |      |      |       |      | 0.45 |       | 0.95  | 0.40 |      |      |      |      |      |       |     |      |       | 100             | 96  |
| AX3    | 4 - 6                                          | 1        | Py + Qz +  | 1.02   |       |       | 23.51 |      |      | 1.16  |      |      |       | 68.64 |      | 1.82 | 1.76 | 2.10 |      |      |       |     |      |       | 100             | 204 |
| AX3    | 4 - 6                                          | 2        | Py + Qz    | 6.91   |       |       | 21.98 |      |      |       |      |      |       | 65.75 |      | 2.62 | 1.78 | 0.95 |      |      |       |     |      |       | 100             | 213 |
| AX3    | 4 - 6                                          | 3        | Cal + Qz   | 12.32  |       |       |       |      |      | 87.68 |      |      |       |       |      |      |      |      |      |      |       |     |      |       | 100             | 61  |
| AX3    | 4 - 6                                          | 4        | Cal + Qz   | 2.87   |       |       |       |      |      | 97.13 |      |      |       |       |      |      |      |      |      |      |       |     |      |       | 100             | 57  |
| AX3    | 4 - 6                                          | 5        | Cal + Qz   | 5.01   |       |       | 0.83  |      |      | 92.83 |      |      |       | 1.33  |      |      |      |      |      |      |       |     |      |       | 100             | 58  |
| AX3    | 4 - 6                                          | 6        | Cal + Qz   | 36.11  |       |       |       |      |      | 63.89 |      |      |       |       |      |      |      |      |      |      |       |     |      |       | 100             | 74  |
| AX3    | 4 - 6                                          | 7        | Cal + Qz   | 19.75  |       |       |       |      | 0.86 | 79.39 |      |      |       |       |      |      |      |      |      |      |       |     |      |       | 100             | 65  |
| AX3    | 4 - 6                                          | 8        | Po + Qz    | 42.82  |       |       | 39.62 |      |      | 0.89  |      |      |       | 15.74 |      |      |      | 0.93 |      |      |       |     |      |       | 100             | 117 |
| AX3    | 4 - 6                                          | 9        | Qz         | 100.00 |       |       |       |      |      |       |      |      |       |       |      |      |      |      |      |      |       |     |      |       | 100             | 116 |
| AX3    | 4 - 6                                          | 10       | Qz         | 100.00 |       |       |       |      |      |       |      |      |       |       |      |      |      |      |      |      |       |     |      |       | 100             | 117 |
| AX3    | 4 - 6                                          | 11       | Qz         | 100.00 |       |       |       |      |      |       |      |      |       |       |      |      |      |      |      |      |       |     |      |       | 100             | 117 |
| AX3    | 4 - 6                                          | 12       | Cal + Qz   | 70.03  |       |       |       |      |      | 29.97 |      |      |       |       |      |      |      |      |      |      |       |     |      |       | 100             | 92  |
| AX3    | 14 - 1-7                                       | 1        | Brt        |        |       |       |       |      |      |       |      |      |       | 36.10 |      |      |      |      |      |      | 63.90 |     |      |       | 100             | 117 |
| AX3    | 14 - 1-7                                       | 2        | Py         |        |       |       | 27.67 | 0.60 |      |       | 2.11 |      |       | 69.63 |      |      |      |      |      |      |       |     |      |       | 100             | 230 |
| AX3    | 14 - 1-7                                       | 3        | Py         |        |       |       | 28.44 | 0.34 |      | 0.28  |      |      |       | 70.94 |      |      |      |      |      |      |       |     |      |       | 100             | 232 |
| AX3    | 14 - 1-7                                       | 4        | Brt        |        |       |       |       |      |      |       |      |      |       | 36.37 |      |      |      |      |      |      | 63.63 |     |      |       | 100             | 117 |
| AX3    | 14 - 1-7                                       | 5        | Brt        |        |       |       |       |      |      | 0.80  |      |      |       | 35.75 |      |      |      |      |      |      | 63.45 |     |      |       | 100             | 119 |
| AX3    | 14 - 1-7                                       | 6        | Py         | 1.84   |       |       | 27.10 | 0.34 |      | 1.77  |      |      |       | 68.95 |      |      |      |      |      |      |       |     |      |       | 100             | 221 |



Table S9.1: Scanning Electron Microscope (SEM) mineral chemical analyses (EDS) of selected sites and positions of sample AX 3.

| Sample | Site +<br>Position<br>from<br>Appendix<br>x A5 | Position | Mineral  | SiO2  | TiO2 | Al2O3 | FeO   | MnO  | MgO  | CaO   | Na2O | K2O  | P2O5 | SO3   | Cl   | CoO  | NiO  | CuO  | ZnO   | Rb2O | MoO3 | BaO   | WO3  | Total | Actual<br>Total |
|--------|------------------------------------------------|----------|----------|-------|------|-------|-------|------|------|-------|------|------|------|-------|------|------|------|------|-------|------|------|-------|------|-------|-----------------|
| AX3    | 14 - 1-7                                       | 7        | Brt + Qz | 1.48  |      |       |       |      |      | 0.65  |      |      |      | 35.23 |      |      |      |      |       |      |      | 62.64 |      | 100   | 117             |
| AX3    | 14 - 1-7                                       | 8        | Brt + Qz | 2.52  |      |       |       |      |      |       |      |      |      | 35.54 |      |      |      |      |       |      |      | 61.95 |      | 100   | 117             |
| AX3    | 14 - 1-7                                       | 9        | Brt + Qz | 2.73  |      |       |       |      |      | 5.90  | 0.88 |      |      | 32.51 |      |      |      |      |       |      |      | 57.99 |      | 100   | 114             |
| AX3    | 14 - 1-7                                       | 10       | Py       | 0.74  |      |       | 27.01 | 0.34 |      | 0.84  |      |      |      | 70.66 |      |      |      | 0.41 |       |      |      |       |      | 100   | 228             |
| AX3    | 14 - 1-7                                       | 11       | Py       | 1.72  |      |       | 25.04 | 0.31 |      | 0.71  |      |      |      | 69.48 |      | 1.07 | 1.20 | 0.47 |       |      |      |       |      | 100   | 228             |
| AX3    | 14 - 1-7                                       | 12       | Brt      |       |      |       |       |      |      | 1.51  |      |      |      | 35.26 |      |      |      |      |       |      |      | 60.78 | 2.45 | 100   | 119             |
| AX3    | 14 - 1-7                                       | 13       | Brt + Qz | 4.35  |      |       |       |      |      | 3.21  | 2.08 | 0.68 |      | 32.83 | 1.36 |      |      |      |       |      |      | 55.48 |      | 100   | 95              |
| AX3    | 14 - 1-7                                       | 14       | Cal + Qz | 19.86 |      |       |       |      | 1.09 | 79.05 |      |      |      |       |      |      |      |      |       |      |      |       |      | 100   | 67              |
| AX3    | 14 - 1-7                                       | 15       | Cal      | 3.70  |      |       |       |      |      | 52.30 |      |      |      |       |      |      |      |      |       |      |      |       |      | 56    | 63              |
| AX3    | 14 - 1-7                                       | 16       | Qz +     | 82.46 |      | 7.61  | 0.41  |      |      | 2.80  |      | 5.66 |      |       |      |      |      |      | 1.06  |      |      |       |      | 100   | 120             |
| AX3    | 14 - 1-7                                       | 17       | Qz + Cal | 93.86 |      |       |       |      |      | 6.14  |      |      |      |       |      |      |      |      |       |      |      |       |      | 100   | 118             |
| AX3    | 14 - 1-7                                       | 18       | Py       | 1.02  |      |       | 26.85 | 0.33 |      | 5.53  |      |      |      | 66.27 |      |      |      |      |       |      |      |       |      | 100   | 205             |
| AX3    | 14 - 1-7                                       | 19       | Znc + Qz | 41.75 |      |       | 0.57  |      |      | 11.02 |      |      |      | 0.91  |      |      |      |      | 43.92 |      |      | 1.82  |      | 100   | 93              |

## Supplementary Material S10: Summary table of all EDS analyses organized by mineral type.

Supplementary Table S10: All EDS analyses by mineral

| Sample | Locality | Site  | Position | Mineral   | SiO2  | TiO2 | Al2O3 | FeO  | MnO  | MgO  | CaO   | Na2O | K2O  | P2O5  | SO3  | F    | Cl   | Cr2O3 | CoO | NiO | CuO | ZnO  | As2O3 | ZrO2 | Ag2O | Rb2O | MoO3 | BaO | PbO | La2O3 | Ce2O3 | Nd2O3 | W2O3 | PtO2 | Total | Actual Total |
|--------|----------|-------|----------|-----------|-------|------|-------|------|------|------|-------|------|------|-------|------|------|------|-------|-----|-----|-----|------|-------|------|------|------|------|-----|-----|-------|-------|-------|------|------|-------|--------------|
| AX1C   | 1        | 2a    | 6        | 7Oz +     | 66.65 |      | 7.19  | 3.96 |      | 3.03 | 15.32 | 1.46 | 1.28 |       |      | 1.09 |      |       |     |     |     |      |       |      |      |      |      |     |     |       |       |       |      | 100  | 27    |              |
| AX1C   | 1        | 4a    | 8        | 7Oz +     | 67.72 |      | 7.65  | 3.96 |      | 3.46 | 10.14 | 1.61 | 1.73 |       | 2.05 | 1.67 |      |       |     |     |     |      |       |      |      |      |      |     |     |       |       |       |      | 100  | 34    |              |
| AX1C   | 1        | 1     | 7        | 7Wg + Oz  | 76.44 |      |       | 3.99 |      |      | 17.57 |      |      |       |      |      |      |       |     |     |     |      |       |      |      |      |      |     |     |       |       |       |      | 100  | 99    |              |
| AX1C   | 1        | 1     | 8        | 7Wg + Oz  | 77.49 |      |       |      |      |      | 22.51 |      |      |       |      |      |      |       |     |     |     |      |       |      |      |      |      |     |     |       |       |       |      | 100  | 96    |              |
| ARK2   | 1        | 5     | 2        | Ap        | 0.95  |      |       |      |      |      | 46.28 |      |      | 43.76 |      | 7.61 |      |       |     |     |     |      |       |      |      |      |      |     |     |       |       |       | 1.41 | 100  | 121   |              |
| AX1C   | 1        | 2     | 3        | Ap        | 0.57  |      |       |      |      |      | 48.61 | 0.96 |      | 42.66 | 1.21 | 4.62 |      |       |     |     |     |      |       |      |      |      |      |     |     |       |       | 1.38  | 100  | 116  |       |              |
| AX1C   | 1        | 2a    | 1        | Ap        |       |      |       |      |      |      | 54.68 | 1.21 |      | 44.11 |      |      |      |       |     |     |     |      |       |      |      |      |      |     |     |       |       |       |      | 100  | 96    |              |
| AX1C   | 1        | 5a    | 12       | Ap        | 19.65 |      |       |      |      |      | 43.76 | 1.16 |      | 33.67 | 1.76 |      |      |       |     |     |     |      |       |      |      |      |      |     |     |       |       |       |      | 100  | 94    |              |
| AX3    | 1        | 3 - 6 | 3        | Ap        |       |      |       |      |      |      | 45.93 | 1.01 |      | 37.99 | 3.40 |      |      |       |     |     |     |      |       |      |      | 4.73 |      |     |     |       |       |       | 6.93 | 100  | 106   |              |
| AX3    | 1        | 3 - 6 | 10       | Ap        |       |      |       |      |      |      | 45.98 | 1.06 |      | 38.44 | 3.33 |      | 0.33 |       |     |     |     |      |       |      | 4.42 |      |      |     |     |       |       | 6.44  | 100  | 109  |       |              |
| SK4a   | 2        | 10    | 3        | Ap        | 1.09  |      |       |      |      |      | 51.14 | 1.13 |      | 39.28 | 1.59 | 5.78 |      |       |     |     |     |      |       |      |      |      |      |     |     |       |       |       |      | 100  | 102   |              |
| SK5    | 2        | 2     | 22       | Ap        | 0.50  |      |       |      |      |      | 49.71 | 0.84 |      | 39.52 | 1.63 | 6.36 |      |       |     |     |     |      |       |      |      |      |      |     |     |       |       |       | 1.44 | 100  | 103   |              |
| SK5    | 2        | 2     | 26       | Ap        | 0.83  |      |       |      |      |      | 49.65 | 1.01 |      | 39.68 | 1.52 | 5.85 |      |       |     |     |     |      |       |      |      |      |      |     |     |       |       |       | 1.46 | 100  | 103   |              |
| SK5    | 2        | 2     | 27       | Ap        | 0.75  |      |       |      |      |      | 50.27 | 1.04 |      | 39.52 | 1.64 | 5.40 |      |       |     |     |     |      |       |      |      |      |      |     |     |       |       |       | 1.38 | 100  | 101   |              |
| SK5    | 2        | 8     | 18       | Ap        |       |      |       |      |      |      | 53.45 | 1.32 |      | 35.41 | 1.72 | 7.64 | 0.46 |       |     |     |     |      |       |      |      |      |      |     |     |       |       |       |      | 100  | 68    |              |
| SK5    | 2        | 13    | 22       | Ap        | 1.02  |      |       |      |      | 0.57 | 48.36 | 1.15 |      | 39.67 | 1.95 | 6.74 | 0.54 |       |     |     |     |      |       |      |      |      |      |     |     |       |       |       |      | 100  | 67    |              |
| SK5    | 2        | 18    | 3        | Ap        | 0.96  |      |       |      |      |      | 50.06 | 0.88 |      | 40.90 | 1.32 | 5.87 |      |       |     |     |     |      |       |      |      |      |      |     |     |       |       |       |      | 100  | 76    |              |
| ARK2   | 1        | 2     | 7        | Ap +      | 1.17  |      |       |      |      | 0.82 | 47.55 | 1.29 |      | 38.42 | 2.44 | 5.64 | 1.28 |       |     |     |     |      |       |      |      |      |      |     |     |       |       |       | 1.39 | 100  | 114   |              |
| AX3    | 1        | 1     | 5        | Ap +      | 27.58 |      |       |      |      |      | 36.47 | 0.84 |      | 27.98 | 2.26 | 4.62 | 0.24 |       |     |     |     |      |       |      |      |      |      |     |     |       |       |       |      | 100  | 111   |              |
| AX3    | 1        | 2     | 7        | Ap +      | 1.07  |      |       |      |      |      | 47.80 | 1.11 |      | 38.73 | 2.41 | 7.12 | 0.38 |       |     |     |     |      |       |      |      |      |      |     |     |       |       |       |      | 100  | 109   |              |
| AX3    | 1        | 2     | 8        | Ap +      | 7.29  |      |       |      |      |      | 46.29 | 1.08 |      | 36.79 | 2.46 | 5.71 | 0.39 |       |     |     |     |      |       |      |      |      |      |     |     |       |       | 1.38  | 100  | 108  |       |              |
| AX3    | 1        | 3     | 3        | Ap +      | 44.12 |      |       |      |      |      | 28.45 | 0.57 |      | 23.17 | 0.90 | 2.78 |      |       |     |     |     |      |       |      |      |      |      |     |     |       |       |       |      | 100  | 108   |              |
| AX3    | 1        | 3     | 6        | Ap +      | 19.89 |      |       |      |      |      | 38.98 | 1.08 |      | 32.39 | 2.34 | 5.03 | 0.28 |       |     |     |     |      |       |      |      |      |      |     |     |       |       |       |      | 100  | 112   |              |
| AX3    | 1        | 3     | 7        | Ap +      | 20.05 |      |       |      |      |      | 39.60 | 0.89 |      | 32.35 | 2.25 | 4.64 | 0.24 |       |     |     |     |      |       |      |      |      |      |     |     |       |       |       |      | 100  | 123   |              |
| AX3    | 1        | 6     | 1        | Ap +      | 0.97  |      | 0.97  | 2.84 |      |      | 43.53 | 1.34 |      | 41.09 | 2.24 | 5.43 | 0.24 |       |     |     |     |      |       |      |      |      |      |     |     |       |       |       | 1.35 | 100  | 101   |              |
| AX3    | 1        | 7     | 4        | Ap +      | 28.55 |      | 1.33  | 1.33 |      |      | 31.12 | 1.38 |      | 30.25 | 1.72 | 4.14 | 0.19 |       |     |     |     |      |       |      |      |      |      |     |     |       |       |       |      | 100  | 115   |              |
| AX3    | 1        | 8     | 4        | Ap +      | 2.90  |      | 3.14  | 2.69 |      |      | 40.65 | 1.22 |      | 41.95 | 2.33 | 5.13 |      |       |     |     |     |      |       |      |      |      |      |     |     |       |       |       |      | 100  | 106   |              |
| AX3    | 1        | 10    | 3        | Ap +      | 5.13  |      | 0.69  | 0.61 |      |      | 45.57 | 0.97 |      | 39.12 | 2.09 | 5.83 |      |       |     |     |     |      |       |      |      |      |      |     |     |       |       |       |      | 100  | 99    |              |
| SK5    | 2        | 2     | 24       | Ap +      | 0.64  |      |       |      |      |      | 50.05 | 1.12 |      | 39.67 | 1.57 | 5.61 |      |       |     |     |     |      |       |      |      |      |      |     |     |       |       |       | 1.34 | 100  | 100   |              |
| SK5    | 2        | 2     | 25       | Ap +      | 1.28  |      |       |      |      |      | 50.35 | 1.02 |      | 39.39 | 1.62 | 6.33 |      |       |     |     |     |      |       |      |      |      |      |     |     |       |       |       |      | 100  | 100   |              |
| AX1B   | 1        | 9     | 3        | Ap + Oz   | 55.28 |      |       |      |      |      | 22.61 | 0.81 |      | 18.94 | 0.63 | 2.54 |      |       |     |     |     |      |       |      |      |      |      |     |     |       |       |       |      | 100  | 111   |              |
| AX1B   | 1        | 9     | 4        | Ap + Oz   | 46.52 |      |       |      |      |      | 25.18 | 0.52 |      | 22.85 | 0.76 | 4.16 |      |       |     |     |     |      |       |      |      |      |      |     |     |       |       |       |      | 100  | 118   |              |
| AX1B   | 1        | 9     | 7        | Ap + Oz   | 59.98 |      |       |      |      |      | 18.50 | 1.61 |      | 16.21 | 1.82 | 2.79 |      |       |     |     |     | 0.70 |       |      |      |      |      |     |     |       |       |       |      | 100  | 100   |              |
| AX1B   | 1        | 9-3,4 | 2        | Ap + Oz   | 33.65 |      |       |      |      |      | 31.96 | 0.81 |      | 27.95 | 0.97 | 4.66 |      |       |     |     |     |      |       |      |      |      |      |     |     |       |       |       |      | 100  | 115   |              |
| AX1B   | 1        | 9-3,4 | 3        | Ap + Oz   | 28.42 |      |       |      |      |      | 35.16 | 0.80 |      | 29.63 | 0.99 | 5.00 |      |       |     |     |     |      |       |      |      |      |      |     |     |       |       |       |      | 100  | 113   |              |
| AX1B   | 1        | 9-3,4 | 4        | Ap + Oz   | 60.84 |      |       |      |      |      | 17.93 |      |      | 15.30 | 1.77 | 3.64 |      |       |     |     |     | 0.53 |       |      |      |      |      |     |     |       |       |       |      | 100  | 109   |              |
| AX1B   | 1        | 9-3,4 | 7        | Ap + Oz   | 27.25 |      |       |      |      |      | 35.60 | 0.84 |      | 30.71 | 1.02 | 4.58 |      |       |     |     |     |      |       |      |      |      |      |     |     |       |       |       |      | 100  | 115   |              |
| AX1B   | 1        | 9-3,4 | 8        | Ap + Oz   | 33.54 |      |       |      |      |      | 33.07 | 0.62 |      | 26.69 | 1.11 | 4.97 |      |       |     |     |     |      |       |      |      |      |      |     |     |       |       |       |      | 100  | 112   |              |
| AX1B   | 1        | 9-3,4 | 9        | Ap + Oz   | 33.05 |      |       |      |      |      | 33.27 | 0.66 |      | 27.55 | 1.01 | 4.47 |      |       |     |     |     |      |       |      |      |      |      |     |     |       |       |       |      | 100  | 116   |              |
| AX3    | 1        | 3 - 3 | 2        | Ap + Oz   | 39.58 |      |       |      |      |      | 33.48 | 0.72 |      | 26.22 |      |      |      |       |     |     |     |      |       |      |      |      |      |     |     |       |       |       |      | 100  | 103   |              |
| AX3    | 1        | 3 - 3 | 3        | Ap + Oz   | 29.43 |      |       |      |      |      | 39.40 | 0.78 |      | 30.39 |      |      |      |       |     |     |     |      |       |      |      |      |      |     |     |       |       |       |      | 100  | 105   |              |
| AX3    | 1        | 3 - 3 | 4        | Ap + Oz   | 66.56 |      |       |      |      |      | 17.77 | 0.58 |      | 15.11 |      |      |      |       |     |     |     |      |       |      |      |      |      |     |     |       |       |       |      | 100  | 109   |              |
| AX3    | 1        | 3 - 6 | 4        | Ap + Oz   | 33.90 |      |       |      |      |      | 34.66 | 1.10 |      | 28.16 | 2.17 |      |      |       |     |     |     |      |       |      |      |      |      |     |     |       |       |       |      | 100  | 108   |              |
| SK5    | 2        | 1     | 2        | Ap + Oz   | 4.84  |      |       |      |      |      | 48.60 |      |      | 38.12 | 1.60 | 6.84 |      |       |     |     |     |      |       |      |      |      |      |     |     |       |       |       |      | 100  | 103   |              |
| SK5    | 2        | 1     | 4        | Ap + Oz   | 47.65 |      |       |      | 1.15 |      | 28.81 |      |      | 19.43 | 1.00 | 1.96 |      |       |     |     |     |      |       |      |      |      |      |     |     |       |       |       |      | 100  | 102   |              |
| SK5    | 2        | 2     | 23       | Ap + Oz   | 5.07  |      |       |      |      |      | 49.91 | 0.72 |      | 38.24 | 1.53 | 4.52 |      |       |     |     |     |      |       |      |      |      |      |     |     |       |       |       |      | 100  | 92    |              |
| SK5    | 2        | 2     | 28       | Ap + Oz   | 41.28 |      |       | 2.01 |      |      | 31.63 | 0.42 |      | 23.65 | 1.01 |      |      |       |     |     |     |      |       |      |      |      |      |     |     |       |       |       |      | 100  | 99    |              |
| SK5    | 2        | 4     | 14       | Ap + Oz   | 30.06 |      |       |      |      |      | 34.39 | 0.66 |      | 28.98 | 1.46 | 4.46 |      |       |     |     |     |      |       |      |      |      |      |     |     |       |       |       |      | 100  | 104   |              |
| SK5    | 2        | 6     | 7        | Ap + Oz   | 59.04 |      |       |      |      |      | 21.21 | 0.48 |      | 15.97 | 0.92 | 2.37 |      |       |     |     |     |      |       |      |      |      |      |     |     |       |       |       |      | 100  | 103   |              |
| SK5    | 2        | 12    | 11       | Ap + Oz   | 1.80  |      |       |      |      |      | 50.92 | 1.12 |      | 38.17 | 1.57 | 5.62 | 0.80 |       |     |     |     |      |       |      |      |      |      |     |     |       |       |       |      | 100  | 49    |              |
| SK5    | 2        | 14    | 10       | Ap + Oz   | 16.59 |      |       |      |      | 0.36 | 40.61 | 0.85 |      | 34.43 | 1.65 | 5.24 | 0.28 |       |     |     |     |      |       |      |      |      |      |     |     |       |       |       |      | 100  | 100   |              |
| SK5    | 2        | 14    | 21       | Ap + Oz   | 2.43  |      |       |      |      | 0.48 | 48.70 | 0.93 |      | 40.07 | 2.01 | 5.10 | 0.30 |       |     |     |     |      |       |      |      |      |      |     |     |       |       |       |      | 100  | 100   |              |
| SK5    | 2        | 14    | 30       | Ap + Oz   | 3.89  |      |       |      |      | 0.78 | 49.54 | 0.90 |      | 36.40 | 1.97 | 6.26 | 0.27 |       |     |     |     |      |       |      |      |      |      |     |     |       |       |       |      | 100  | 90    |              |
| SK5    | 2        | 16    | 10       | Ap + Oz   | 5.13  |      |       |      |      |      | 52.94 | 0.84 |      | 34.30 | 1.56 | 5.00 | 0.22 |       |     |     |     |      |       |      |      |      |      |     |     |       |       |       |      | 100  | 90    |              |
| SK5    | 2        | 17    | 14       | Ap + Oz   | 4.97  |      |       |      |      |      | 49.52 | 0.84 |      | 37.14 | 1.34 | 6.19 |      |       |     |     |     |      |       |      |      |      |      |     |     |       |       |       |      | 100  | 95    |              |
| SK5    | 2        | 18    | 2        | Ap + Oz   | 1.10  |      |       |      |      |      | 50.23 | 0.78 |      | 40.25 | 1.52 | 5.77 | 0.34 |       |     |     |     |      |       |      |      |      |      |     |     |       |       |       |      | 100  | 86    |              |
| SK5    | 2        | 18    | 4        | Ap + Oz   | 20.98 |      |       |      |      |      | 39.55 | 0.74 |      | 32.63 | 1.17 | 4.94 |      |       |     |     |     |      |       |      |      |      |      |     |     |       |       |       |      | 100  | 90    |              |
| SK5    | 2        | 22    | 25       | Ap + Oz   | 1.52  |      |       |      |      |      | 49.32 | 1.26 |      | 38.16 | 1.94 | 7.28 | 0.52 |       |     |     |     |      |       |      |      |      |      |     |     |       |       |       |      | 100  | 95    |              |
| ARK2   | 1        | 3     | 2        | Ap + Oz + | 25.55 |      |       |      |      | 0.57 | 37.40 | 0.81 |      | 28.51 | 1.99 | 4.52 | 0.67 |       |     |     |     |      |       |      |      |      |      |     |     |       |       |       |      |      |       |              |

Supplementary Table S10: All EDS analyses by mineral

| Sample | Locality | Site   | Position | Mineral        | SiO2  | TiO2 | Al2O3 | FeO  | MnO  | MgO  | CaO   | Na2O  | K2O  | P2O5 | SO3   | F    | Cl   | Cr2O3 | CoO  | NiO  | CuO  | ZnO  | As2O3 | ZrO2 | Ag2O | Rb2O | MoO3 | BaO   | PbO   | Li2O3 | Cu2O3 | Ni2O3 | VO3  | PtO2 | Total | Actual Total |     |
|--------|----------|--------|----------|----------------|-------|------|-------|------|------|------|-------|-------|------|------|-------|------|------|-------|------|------|------|------|-------|------|------|------|------|-------|-------|-------|-------|-------|------|------|-------|--------------|-----|
| SK4a   | 2        | 5      | 21       | Brt + Cal + Oz | 2.18  |      |       |      |      |      | 2.21  |       |      |      | 36.58 |      |      |       |      |      |      |      |       |      |      |      |      | 59.11 |       |       |       |       |      |      | 100   | 106          |     |
| SK4a   | 2        | 5      | 22       | Brt + Cal + Oz | 4.82  |      |       | 0.89 |      |      | 0.47  |       |      |      | 31.04 |      |      |       |      |      |      |      | 0.06  |      |      |      |      |       | 57.63 |       |       |       |      |      |       | 100          | 106 |
| SK4a   | 2        | 5      | 25       | Brt + Cal + Oz | 6.55  |      |       |      |      |      | 11.06 |       |      |      | 29.49 |      |      |       |      |      |      |      |       |      |      |      |      |       | 52.90 |       |       |       |      |      |       | 100          | 106 |
| SK4a   | 2        | 5      | 27       | Brt + Cal + Oz | 3.89  |      |       |      |      |      | 13.40 |       |      |      | 30.16 |      |      |       |      |      |      |      |       |      |      |      |      |       | 52.58 |       |       |       |      |      |       | 100          | 98  |
| SK4a   | 2        | 5      | 28       | Brt + Cal + Oz | 1.98  |      |       |      |      |      | 26.51 |       |      |      | 25.49 |      |      |       |      |      |      |      |       |      |      |      |      |       | 46.04 |       |       |       |      |      |       | 100          | 85  |
| SK4a   | 2        | 5      | 29       | Brt + Cal + Oz | 2.60  |      |       |      |      | 0.57 | 15.66 |       |      |      | 28.49 |      |      |       |      |      |      |      |       |      |      |      |      |       | 52.77 |       |       |       |      |      |       | 100          | 99  |
| SK4a   | 2        | 5      | 30       | Brt + Cal + Oz | 1.91  |      |       |      |      |      | 5.95  |       |      |      | 34.14 |      |      |       |      |      |      |      |       |      |      |      |      |       | 58.01 |       |       |       |      |      |       | 100          | 106 |
| SK4a   | 2        | 9      | 11       | Brt + Cal + Oz | 3.17  |      |       |      |      |      | 31.71 |       |      |      | 22.11 |      |      |       |      |      |      |      |       |      |      |      |      |       | 43.19 |       |       |       |      |      |       | 100          | 82  |
| SK4a   | 2        | 11     | 10       | Brt + Cal + Oz | 6.06  |      |       |      |      |      | 36.45 |       |      |      | 20.46 |      |      |       |      |      |      |      |       |      |      |      |      |       | 37.14 |       |       |       |      |      |       | 100          | 84  |
| SK4a   | 2        | 11     | 14       | Brt + Cal + Oz | 1.44  |      |       |      |      |      | 6.78  |       |      |      | 33.99 |      |      |       |      |      |      |      |       |      |      |      |      |       | 57.84 |       |       |       |      |      |       | 100          | 116 |
| SK5    | 2        | 21     | 5        | Brt + Cal + Oz | 1.80  |      |       |      |      |      | 21.52 |       |      |      | 29.30 |      |      |       |      |      |      |      |       |      |      |      |      |       | 47.42 |       |       |       |      |      |       | 100          | 93  |
| SK5    | 2        | 21     | 6        | Brt + Cal + Oz | 3.87  |      |       |      |      |      | 3.66  |       |      |      | 34.19 |      |      |       |      |      |      |      |       |      |      |      |      |       | 58.27 |       |       |       |      |      |       | 100          | 104 |
| SK5    | 2        | 21     | 7        | Brt + Cal + Oz | 11.11 |      |       |      |      |      | 16.80 |       |      |      | 26.62 |      |      |       |      |      |      |      |       |      |      |      |      |       | 45.57 |       |       |       |      |      |       | 100          | 89  |
| SK5    | 2        | 21     | 9        | Brt + Cal + Oz | 7.93  |      |       |      |      |      | 21.79 | 0.56  |      |      | 26.01 |      |      |       |      |      |      |      |       |      |      |      |      |       | 43.97 |       |       |       |      |      |       | 100          | 91  |
| SK5    | 2        | 21     | 11       | Brt + Cal + Oz | 5.96  |      |       |      |      |      | 13.42 |       |      |      | 29.83 |      |      |       |      |      |      |      |       |      |      |      |      |       | 50.84 |       |       |       |      |      |       | 100          | 96  |
| SK5    | 2        | 21     | 12       | Brt + Cal + Oz | 7.87  |      |       |      |      |      | 23.63 |       |      |      | 23.65 |      |      |       |      |      |      |      |       |      |      |      |      |       | 44.89 |       |       |       |      |      |       | 100          | 85  |
| SK5    | 2        | 21     | 13       | Brt + Cal + Oz | 8.49  |      |       |      |      |      | 6.32  |       |      |      | 31.06 |      |      |       |      |      |      |      |       |      |      |      |      |       | 53.92 |       |       |       |      |      |       | 100          | 105 |
| SK5    | 2        | 21     | 15       | Brt + Cal + Oz | 3.22  |      |       |      |      |      | 9.45  |       |      |      | 32.33 |      |      |       |      |      |      |      |       |      |      |      |      |       | 55.09 |       |       |       |      |      |       | 100          | 101 |
| SK5    | 2        | 21     | 16       | Brt + Cal + Oz | 2.67  |      |       |      |      |      | 4.33  |       |      |      | 33.87 |      |      |       |      |      |      |      |       |      |      |      |      |       | 59.13 |       |       |       |      |      |       | 100          | 104 |
| SK5    | 2        | 21     | 19       | Brt + Cal + Oz | 6.51  |      |       |      |      |      | 26.92 |       |      |      | 23.25 |      |      |       |      |      |      |      |       |      |      |      |      |       | 43.38 |       |       |       |      |      |       | 100          | 81  |
| SK5    | 2        | 21     | 20       | Brt + Cal + Oz | 7.46  |      |       |      |      |      | 16.57 |       |      |      | 27.53 |      |      |       |      |      |      |      |       |      |      |      |      |       | 48.45 |       |       |       |      |      |       | 100          | 94  |
| SK5    | 2        | 21     | 22       | Brt + Cal + Oz | 23.74 |      |       |      |      |      | 42.65 |       |      |      | 11.44 |      |      |       |      |      |      |      |       |      |      |      |      |       | 22.17 |       |       |       |      |      |       | 100          | 76  |
| SK5    | 2        | 21     | 25       | Brt + Cal + Oz | 20.66 |      |       |      |      | 0.66 | 26.74 |       |      |      | 19.55 |      |      |       |      |      |      |      |       |      |      |      |      |       | 32.37 |       |       |       |      |      |       | 100          | 81  |
| SK5    | 2        | 21     | 26       | Brt + Cal + Oz | 13.53 |      |       |      |      |      | 25.03 |       |      |      | 22.86 |      |      |       |      |      |      |      |       |      |      |      |      |       | 38.63 |       |       |       |      |      |       | 100          | 86  |
| SK5    | 2        | 21     | 27       | Brt + Cal + Oz | 22.43 |      |       |      |      | 0.70 | 49.31 |       |      |      | 9.16  |      |      |       |      |      |      |      |       |      |      |      |      |       | 18.40 |       |       |       |      |      |       | 100          | 72  |
| SK5    | 2        | 21     | 31       | Brt + Cal + Oz | 20.91 |      |       |      |      |      | 40.12 |       |      |      | 13.52 |      |      |       |      |      |      |      |       |      |      |      |      |       | 25.40 |       |       |       |      |      |       | 100          | 76  |
| SK5    | 2        | 22     | 1        | Brt + Cal + Oz | 11.22 |      |       |      |      |      | 10.31 |       |      |      | 29.63 |      |      |       |      |      |      |      |       |      |      |      |      |       | 48.85 |       |       |       |      |      |       | 100          | 91  |
| SK5    | 2        | 22     | 2        | Brt + Cal + Oz | 1.48  |      |       |      |      |      | 19.85 | 0.52  |      |      | 29.21 |      |      |       |      |      |      |      |       |      |      |      |      |       | 48.85 |       |       |       |      |      |       | 100          | 85  |
| SK5    | 2        | 22     | 3        | Brt + Cal + Oz | 4.33  |      |       |      |      |      | 17.57 |       |      |      | 28.14 |      |      |       |      |      |      |      |       |      |      |      |      |       | 49.76 |       |       |       |      |      |       | 100          | 79  |
| SK5    | 2        | 22     | 4        | Brt + Cal + Oz | 3.08  |      |       |      |      |      | 24.55 |       |      |      | 26.74 |      |      |       |      |      |      |      |       |      |      |      |      |       | 45.70 |       |       |       |      |      |       | 100          | 76  |
| SK5    | 2        | 22     | 26       | Brt + Cal + Oz | 1.64  |      |       |      |      |      | 32.21 |       |      |      | 23.63 |      |      |       |      |      |      |      |       |      |      |      |      |       | 42.01 |       |       |       |      |      |       | 100          | 76  |
| AX3    | 1        | 14 - 1 | 7        | Brt + Oz       | 1.48  |      |       |      |      |      | 0.85  |       |      |      | 35.23 |      |      |       |      |      |      |      |       |      |      |      |      |       | 62.64 |       |       |       |      |      |       | 100          | 117 |
| AX3    | 1        | 14 - 1 | 8        | Brt + Oz       | 2.52  |      |       |      |      |      |       |       |      |      | 35.54 |      |      |       |      |      |      |      |       |      |      |      |      |       | 61.95 |       |       |       |      |      |       | 100          | 77  |
| AX3    | 1        | 14 - 1 | 9        | Brt + Oz       | 2.73  |      |       |      |      |      | 5.90  | 0.88  |      |      | 32.51 |      |      |       |      |      |      |      |       |      |      |      |      |       | 57.99 |       |       |       |      |      |       | 100          | 114 |
| AX3    | 1        | 14 - 1 | 13       | Brt + Oz       | 4.35  |      |       |      |      |      | 3.21  | 2.08  | 0.68 |      | 32.83 |      | 1.36 |       |      |      |      |      |       |      |      |      |      |       | 55.48 |       |       |       |      |      |       | 100          | 95  |
| SK5    | 2        | 20     | 4        | Brt + Oz +     | 18.03 |      |       | 0.91 |      |      | 5.72  |       | 0.29 |      | 27.52 |      |      |       |      |      |      |      |       |      |      |      |      |       | 47.52 |       |       |       |      |      |       | 100          | 102 |
| AX1B   | 1        | 8      | 5        | Brt + Sp +     | 15.76 |      |       | 1.01 | 1.27 |      | 2.62  |       |      |      | 32.73 |      |      |       |      |      |      |      |       |      |      |      |      |       | 35.94 |       |       |       |      |      |       | 100          | 112 |
| AX1B   | 1        | 8-4,5  | 2        | Brt + Sp +     | 10.44 |      |       | 0.82 |      |      | 1.24  | 1.16  |      |      | 32.77 |      |      |       |      |      |      |      |       |      |      |      |      |       | 3.98  |       |       |       |      |      |       | 100          | 124 |
| ARK2   | 1        | 1      | 8        | Cal            | 0.91  | 0.00 | 0.00  | 0.00 | 0.00 | 0.00 | 0.84  | 54.25 | 0.00 | 0.00 | 0.00  | 0.00 | 0.00 | 0.00  | 0.00 | 0.00 | 0.00 | 0.00 | 0.00  | 0.00 | 0.00 | 0.00 | 0.00 | 0.00  | 0.00  | 0.00  | 0.00  | 0.00  | 0.00 | 0.00 | 56    | 61           |     |
| ARK2   | 1        | 1      | 9        | Cal            | 0.86  | 0.00 | 0.00  | 0.00 | 0.00 | 0.00 | 0.90  | 54.24 | 0.00 | 0.00 | 0.00  | 0.00 | 0.00 | 0.00  | 0.00 | 0.00 | 0.00 | 0.00 | 0.00  | 0.00 | 0.00 | 0.00 | 0.00 | 0.00  | 0.00  | 0.00  | 0.00  | 0.00  | 0.00 | 0.00 | 56    | 60           |     |
| ARK2   | 1        | 1      | 11       | Cal            | 1.28  | 0.00 | 0.00  | 0.00 | 0.00 | 0.88 | 53.83 | 0.00  | 0.00 | 0.00 | 0.00  | 0.00 | 0.00 | 0.00  | 0.00 | 0.00 | 0.00 | 0.00 | 0.00  | 0.00 | 0.00 | 0.00 | 0.00 | 0.00  | 0.00  | 0.00  | 0.00  | 0.00  | 0.00 | 0.00 | 56    | 61           |     |
| ARK2   | 1        | 1      | 12       | Cal            | 0.58  | 0.00 | 0.00  | 0.00 | 0.00 | 1.01 | 54.39 | 0.00  | 0.00 | 0.00 | 0.00  | 0.00 | 0.00 | 0.00  | 0.00 | 0.00 | 0.00 | 0.00 | 0.00  | 0.00 | 0.00 | 0.00 | 0.00 | 0.00  | 0.00  | 0.00  | 0.00  | 0.00  | 0.00 | 0.00 | 56    | 60           |     |
| ARK2   | 1        | 1      | 13       | Cal            | 0.90  | 0.00 | 0.00  | 0.00 | 0.00 | 0.96 | 54.14 | 0.00  | 0.00 | 0.00 | 0.00  | 0.00 | 0.00 | 0.00  | 0.00 | 0.00 | 0.00 | 0.00 | 0.00  | 0.00 | 0.00 | 0.00 | 0.00 | 0.00  | 0.00  | 0.00  | 0.00  | 0.00  | 0.00 | 0.00 | 56    | 60           |     |
| ARK2   | 1        | 1      | 16       | Cal            | 0.88  | 0.00 | 0.00  | 0.00 | 0.00 | 1.00 | 54.12 | 0.00  | 0.00 | 0.00 | 0.00  | 0.00 | 0.00 | 0.00  | 0.00 | 0.00 | 0.00 | 0.00 | 0.00  | 0.00 | 0.00 | 0.00 | 0.00 | 0.00  | 0.00  | 0.00  | 0.00  | 0.00  | 0.00 | 0.00 | 56    | 58           |     |
| ARK2   | 1        | 4      | 1        | Cal            | 1.00  | 0.00 | 0.00  | 0.00 | 0.00 | 0.65 | 54.35 | 0.00  | 0.00 | 0.00 | 0.00  | 0.00 | 0.00 | 0.00  | 0.00 | 0.00 | 0.00 | 0.00 | 0.00  | 0.00 | 0.00 | 0.00 | 0.00 | 0.00  | 0.00  | 0.00  | 0.00  | 0.00  | 0.00 | 0.00 | 56    | 57           |     |
| ARK2   | 1        | 4      | 2        | Cal            | 0.83  | 0.00 | 0.00  | 0.00 | 0.00 | 0.83 | 54.34 | 0.00  | 0.00 | 0.00 | 0.00  | 0.00 | 0.00 | 0.00  | 0.00 | 0.00 | 0.00 | 0.00 | 0.00  | 0.00 | 0.00 | 0.00 | 0.00 | 0.00  | 0.00  | 0.00  | 0.00  | 0.00  | 0.00 | 0.00 | 56    | 59           |     |
| ARK2   | 1        | 4      | 3        | Cal            | 0.95  | 0.00 | 0.00  | 0.00 | 0.00 | 1.00 | 54.05 | 0.00  | 0.00 | 0.00 | 0.00  | 0.00 | 0.00 | 0.00  | 0.00 | 0.00 | 0.00 | 0.00 | 0.00  | 0.00 | 0.00 | 0.00 | 0.00 | 0.00  | 0.00  | 0.00  | 0.00  | 0.00  | 0.00 | 0.00 | 56    | 58           |     |
| ARK2   | 1        | 8      | 2        | Cal            | 4.92  | 0.00 | 0.00  | 0.00 | 0.00 | 0.96 | 50.12 | 0.00  | 0.00 | 0.00 | 0.00  | 0.00 | 0.00 | 0.00  | 0.00 | 0.00 | 0.00 | 0.00 | 0.00  | 0.00 | 0.00 | 0.00 | 0.00 | 0.00  | 0.00  | 0.00  | 0.00  | 0.00  | 0.00 | 0.00 | 56    | 58           |     |
| ARK2   | 1        | 8      | 3        | Cal            | 2.38  | 0.00 | 0.00  | 0.00 | 2.97 | 0.77 | 49.88 | 0.00  | 0.00 | 0.00 | 0.00  | 0.00 | 0.00 | 0.00  | 0.00 | 0.00 | 0.00 | 0.00 | 0.00  | 0.00 | 0.00 | 0.00 | 0.00 | 0.00  | 0.00  | 0.00  | 0.00  | 0.00  | 0.00 | 0.00 | 56    | 55           |     |
| ARK2   | 1        | 8      | 6        | Cal            | 2.23  | 0.00 | 0.00  | 0.00 | 1.85 | 0.00 | 1.13  | 50.79 | 0.00 | 0.00 | 0.00  | 0.00 | 0.00 | 0.00  | 0.00 | 0.00 | 0.00 | 0.00 | 0.00  | 0.00 | 0.00 | 0.00 | 0.00 | 0.00  | 0.00  | 0.00  | 0.00  | 0.00  | 0.00 | 0.00 | 56    | 58           |     |
| ARK2   | 1        | 8      | 11       | Cal            | 1.96  | 0.00 | 0.00  | 0.00 | 0.00 | 0.78 | 53.26 | 0.00  | 0.00 | 0.00 | 0.00  | 0.00 | 0.00 | 0.00  | 0.00 | 0.00 | 0.00 | 0.00 | 0.00  | 0.00 | 0.00 | 0.00 | 0.00 | 0.00  | 0.00  | 0.00  | 0.00  | 0.00  | 0.00 | 0.00 | 56    | 54           |     |
| AX1A   | 1        | 2      | 1        | Cal</          |       |      |       |      |      |      |       |       |      |      |       |      |      |       |      |      |      |      |       |      |      |      |      |       |       |       |       |       |      |      |       |              |     |

Supplementary Table S10: All EDS analyses by mineral

| Sample | Locality | Site | Position | Mineral | SiO2 | TiO2 | Al2O3 | FeO  | MnO  | MgO  | CaO   | Na2O | K2O  | P2O5 | SO3  | F    | Cl   | CO2 | CoO  | NO | CrO | ZrO  | As2O3 | ZnO | Ag2O | Rb2O | MnO3 | BaO  | PbO | LaxO3 | Ca2O3 | Nd2O3 | VO3 | PO2 | Total | Actual Total |
|--------|----------|------|----------|---------|------|------|-------|------|------|------|-------|------|------|------|------|------|------|-----|------|----|-----|------|-------|-----|------|------|------|------|-----|-------|-------|-------|-----|-----|-------|--------------|
| SK4a   | 2        | 4    | 13       | Cal     | 0.85 | 0.00 | 0.00  | 0.00 | 0.00 | 0.00 | 55.15 | 0.00 | 0.00 | 0.00 | 0.00 | 0.00 | 0.00 |     | 0.00 |    |     | 0.00 |       |     | 0.00 |      |      | 0.00 |     | 0.00  | 0.00  | 0.00  |     |     | 56    | 55           |
| SK4a   | 2        | 5    | 12       | Cal     | 0.88 | 0.00 | 0.00  | 0.00 | 0.00 | 0.00 | 55.12 | 0.00 | 0.00 | 0.00 | 0.00 | 0.00 | 0.00 |     | 0.00 |    |     | 0.00 |       |     | 0.00 |      |      | 0.00 |     | 0.00  | 0.00  | 0.00  |     |     | 56    | 57           |
| SK4a   | 2        | 5    | 23       | Cal     | 0.93 | 0.00 | 0.00  | 0.00 | 0.00 | 0.00 | 55.07 | 0.00 | 0.00 | 0.00 | 0.00 | 0.00 | 0.00 |     | 0.00 |    |     | 0.00 |       |     | 0.00 |      |      | 0.00 |     | 0.00  | 0.00  | 0.00  |     |     | 56    | 57           |
| SK4a   | 2        | 5    | 37       | Cal     | 0.91 | 0.00 | 0.00  | 0.00 | 0.00 | 0.41 | 54.67 | 0.00 | 0.00 | 0.00 | 0.00 | 0.00 | 0.00 |     | 0.00 |    |     | 0.00 |       |     | 0.00 |      |      | 0.00 |     | 0.00  | 0.00  | 0.00  |     |     | 56    | 55           |
| SK4a   | 2        | 5    | 40       | Cal     | 0.00 | 0.00 | 0.00  | 0.00 | 0.00 | 0.39 | 55.61 | 0.00 | 0.00 | 0.00 | 0.00 | 0.00 | 0.00 |     | 0.00 |    |     | 0.00 |       |     | 0.00 |      |      | 0.00 |     | 0.00  | 0.00  | 0.00  |     |     | 56    | 58           |
| SK4a   | 2        | 6    | 1        | Cal     | 0.00 | 0.00 | 0.00  | 0.00 | 0.00 | 0.53 | 55.47 | 0.00 | 0.00 | 0.00 | 0.00 | 0.00 | 0.00 |     | 0.00 |    |     | 0.00 |       |     | 0.00 |      |      | 0.00 |     | 0.00  | 0.00  | 0.00  |     |     | 56    | 52           |
| SK4a   | 2        | 6    | 5        | Cal     | 1.09 | 0.00 | 0.00  | 0.00 | 0.00 | 0.30 | 54.91 | 0.00 | 0.00 | 0.00 | 0.00 | 0.00 | 0.00 |     | 0.00 |    |     | 0.00 |       |     | 0.00 |      |      | 0.00 |     | 0.00  | 0.00  | 0.00  |     |     | 56    | 57           |
| SK4a   | 2        | 7    | 15       | Cal     | 0.94 | 0.00 | 0.00  | 0.00 | 0.00 | 0.39 | 54.67 | 0.00 | 0.00 | 0.00 | 0.00 | 0.00 | 0.00 |     | 0.00 |    |     | 0.00 |       |     | 0.00 |      |      | 0.00 |     | 0.00  | 0.00  | 0.00  |     |     | 56    | 57           |
| SK4a   | 2        | 8    | 2        | Cal     | 0.98 | 0.00 | 0.00  | 0.00 | 0.00 | 0.00 | 55.02 | 0.00 | 0.00 | 0.00 | 0.00 | 0.00 | 0.00 |     | 0.00 |    |     | 0.00 |       |     | 0.00 |      |      | 0.00 |     | 0.00  | 0.00  | 0.00  |     |     | 56    | 55           |
| SK4a   | 2        | 9    | 1        | Cal     | 0.98 | 0.00 | 0.00  | 0.00 | 0.00 | 0.48 | 54.54 | 0.00 | 0.00 | 0.00 | 0.00 | 0.00 | 0.00 |     | 0.00 |    |     | 0.00 |       |     | 0.00 |      |      | 0.00 |     | 0.00  | 0.00  | 0.00  |     |     | 56    | 50           |
| SK4a   | 2        | 10   | 2        | Cal     | 0.90 | 0.00 | 0.00  | 0.00 | 0.00 | 0.00 | 55.10 | 0.00 | 0.00 | 0.00 | 0.00 | 0.00 | 0.00 |     | 0.00 |    |     | 0.00 |       |     | 0.00 |      |      | 0.00 |     | 0.00  | 0.00  | 0.00  |     |     | 56    | 55           |
| SK4a   | 2        | 10   | 5        | Cal     | 0.92 | 0.00 | 0.00  | 0.00 | 0.00 | 0.57 | 54.50 | 0.00 | 0.00 | 0.00 | 0.00 | 0.00 | 0.00 |     | 0.00 |    |     | 0.00 |       |     | 0.00 |      |      | 0.00 |     | 0.00  | 0.00  | 0.00  |     |     | 56    | 57           |
| SK4a   | 2        | 11   | 2        | Cal     | 0.00 | 0.00 | 0.00  | 0.00 | 0.00 | 0.85 | 55.15 | 0.00 | 0.00 | 0.00 | 0.00 | 0.00 | 0.00 |     | 0.00 |    |     | 0.00 |       |     | 0.00 |      |      | 0.00 |     | 0.00  | 0.00  | 0.00  |     |     | 56    | 57           |
| SK4a   | 2        | 11   | 3        | Cal     | 1.16 | 0.00 | 0.00  | 0.00 | 0.00 | 0.77 | 54.04 | 0.00 | 0.00 | 0.00 | 0.00 | 0.00 | 0.00 |     | 0.00 |    |     | 0.02 |       |     | 0.00 |      |      | 0.00 |     | 0.00  | 0.00  | 0.00  |     |     | 56    | 57           |
| SK4a   | 2        | 11   |          |         |      |      |       |      |      |      |       |      |      |      |      |      |      |     |      |    |     |      |       |     |      |      |      |      |     |       |       |       |     |     |       |              |

Supplementary Table S10: All EDS analyses by mineral

| Sample | Locality | Site  | Position | Mineral            | SiO2  | TiO2 | Al2O3 | FeO   | MnO  | MgO  | CaO   | Na2O | K2O  | P2O5 | SO3  | F    | Cl   | Cr2O3 | CoO  | NiO | CuO | ZnO  | As2O3 | ZrO2 | Ag2O | Rb2O | MoO3 | BaO   | PbO | Li2O3 | Cu2O3 | Nd2O3 | VO3 | PbO2 | Total | Actual Total |
|--------|----------|-------|----------|--------------------|-------|------|-------|-------|------|------|-------|------|------|------|------|------|------|-------|------|-----|-----|------|-------|------|------|------|------|-------|-----|-------|-------|-------|-----|------|-------|--------------|
| AX1C   | 1        | 3a    | 5        | Cal +              | 16.27 |      |       |       |      |      | 83.73 |      |      |      |      |      |      |       |      |     |     |      |       |      |      |      |      |       |     |       |       |       |     | 100  | 60    |              |
| AX1C   | 1        | 3a    | 12       | Cal +              | 10.08 |      |       |       |      |      | 89.92 |      |      |      |      |      |      |       |      |     |     |      |       |      |      |      |      |       |     |       |       |       |     | 100  | 58    |              |
| AX1C   | 1        | 3a    | 13       | Cal +              | 8.46  |      |       |       |      |      | 91.54 |      |      |      |      |      |      |       |      |     |     |      |       |      |      |      |      |       |     |       |       |       |     | 100  | 59    |              |
| AX1C   | 1        | 4a    | 5        | Cal +              | 8.07  |      |       |       |      |      | 91.93 |      |      |      |      |      |      |       |      |     |     |      |       |      |      |      |      |       |     |       |       |       |     | 100  | 58    |              |
| AX1C   | 1        | 4a    | 7        | Cal +              | 7.95  |      |       |       |      |      | 92.05 |      |      |      |      |      |      |       |      |     |     |      |       |      |      |      |      |       |     |       |       |       |     | 100  | 57    |              |
| AX1C   | 1        | 4a    | 11       | Cal +              | 11.31 |      |       |       |      |      | 88.69 |      |      |      |      |      |      |       |      |     |     |      |       |      |      |      |      |       |     |       |       |       |     | 100  | 60    |              |
| AX3    | 1        | 4     | 3        | Cal +              | 15.67 |      | 3.77  | 0.88  |      | 1.67 | 76.73 |      | 1.28 |      |      |      |      |       |      |     |     |      |       |      |      |      |      |       |     |       |       |       |     | 100  | 65    |              |
| AX1B   | 1        | 7-4.6 | 5        | Cal +              | 2.82  |      |       |       |      |      | 95.12 |      |      |      | 0.92 |      |      |       |      |     |     | 1.14 |       |      |      |      |      |       |     |       |       |       |     | 100  | 60    |              |
| AX1B   | 1        | 7-4.6 | 8        | Cal +              | 2.62  |      |       |       |      |      | 95.42 |      |      |      | 1.03 |      |      |       |      |     |     | 0.93 |       |      |      |      |      |       |     |       |       |       |     | 100  | 60    |              |
| AX1B   | 1        | 7-4.6 | 10       | Cal +              | 3.26  |      |       |       |      |      | 95.75 |      |      |      |      |      |      |       |      |     |     | 0.98 |       |      |      |      |      |       |     |       |       |       |     | 100  | 61    |              |
| AX1B   | 1        | 7-3.5 | 6        | Cal +              | 5.89  |      |       |       |      | 0.62 | 91.30 |      |      |      |      |      |      |       |      |     |     | 0.92 |       |      |      |      |      |       |     |       |       |       |     | 100  | 61    |              |
| AX1B   | 1        | 11-6  | 4        | Cal +              | 7.79  |      |       |       |      | 1.15 | 91.06 |      |      |      | 1.26 |      |      |       |      |     |     |      |       |      |      |      |      |       |     |       |       |       |     | 100  | 57    |              |
| SK4a   | 2        | 1     | 2        | Cal +              | 2.45  |      |       |       |      | 0.79 | 96.75 |      |      |      |      |      |      |       |      |     |     |      |       |      |      |      |      |       |     |       |       |       |     | 100  | 57    |              |
| SK4a   | 2        | 1     | 3        | Cal +              | 3.67  |      |       |       |      |      | 96.33 |      |      |      |      |      |      |       |      |     |     |      |       |      |      |      |      |       |     |       |       |       |     | 100  | 58    |              |
| SK4a   | 2        | 1     | 4        | Cal +              | 5.92  |      |       |       |      | 0.65 | 93.43 |      |      |      |      |      |      |       |      |     |     |      |       |      |      |      |      |       |     |       |       |       |     | 100  | 59    |              |
| SK4a   | 2        | 1     | 6        | Cal +              | 5.10  |      |       |       |      | 0.68 | 94.22 |      |      |      |      |      |      |       |      |     |     |      |       |      |      |      |      |       |     |       |       |       |     | 100  | 60    |              |
| SK4a   | 2        | 1     | 10       | Cal +              | 4.03  |      |       |       |      | 1.05 | 94.92 |      |      |      |      |      |      |       |      |     |     |      |       |      |      |      |      |       |     |       |       |       |     | 100  | 60    |              |
| SK4a   | 2        | 2     | 2        | Cal +              | 2.03  |      |       |       |      | 0.88 | 97.09 |      |      |      |      |      |      |       |      |     |     |      |       |      |      |      |      |       |     |       |       |       |     | 100  | 57    |              |
| SK4a   | 2        | 2     | 8        | Cal +              | 2.78  |      |       |       |      |      | 97.22 |      |      |      |      |      |      |       |      |     |     |      |       |      |      |      |      |       |     |       |       |       |     | 100  | 59    |              |
| SK4a   | 2        | 3     | 3        | Cal +              | 2.60  |      |       |       |      |      | 97.40 |      |      |      |      |      |      |       |      |     |     |      |       |      |      |      |      |       |     |       |       |       |     | 100  | 57    |              |
| SK4a   | 2        | 3     | 18       | Cal +              | 2.28  |      |       |       |      |      | 97.72 |      |      |      |      |      |      |       |      |     |     |      |       |      |      |      |      |       |     |       |       |       |     | 100  | 57    |              |
| SK4a   | 2        | 5     | 26       | Cal +              | 4.07  |      |       |       |      | 0.67 | 95.26 |      |      |      |      |      |      |       |      |     |     |      |       |      |      |      |      |       |     |       |       |       |     | 100  | 57    |              |
| SK4a   | 2        | 7     | 2        | Cal +              | 2.07  |      |       |       |      |      | 97.93 |      |      |      |      |      |      |       |      |     |     |      |       |      |      |      |      |       |     |       |       |       |     | 100  | 55    |              |
| SK4a   | 2        | 7     | 3        | Cal +              | 2.39  |      |       |       |      |      | 97.61 |      |      |      |      |      |      |       |      |     |     |      |       |      |      |      |      |       |     |       |       |       |     | 100  | 56    |              |
| SK4a   | 2        | 7     | 7        | Cal +              | 22.77 |      | 0.58  | 14.33 |      | 0.73 | 61.59 |      |      |      |      |      |      |       |      |     |     |      |       |      |      |      |      |       |     |       |       |       |     | 100  | 69    |              |
| SK4a   | 2        | 7     | 8        | Cal +              | 35.03 | 0.00 | 0.61  | 8.87  | 0.00 | 0.65 | 54.84 | 0.00 | 0.00 | 0.00 | 0.00 | 0.00 | 0.00 |       | 0.00 |     |     | 0.00 |       |      | 0.00 |      |      | 0.00  |     |       |       |       | 100 | 76   |       |              |
| SK4a   | 2        | 7     | 10       | Cal +              | 2.21  |      |       |       |      |      | 97.79 |      |      |      |      |      |      |       |      |     |     |      |       |      |      |      |      |       |     |       |       |       |     | 100  | 57    |              |
| SK4a   | 2        | 7     | 11       | Cal +              | 33.84 |      |       | 17.00 |      | 0.85 | 48.31 |      |      |      |      |      |      |       |      |     |     |      |       |      |      |      |      |       |     |       |       |       |     | 100  | 74    |              |
| SK4a   | 2        | 7     | 13       | Cal +              | 6.91  |      | 0.93  | 27.64 |      | 0.95 | 63.58 |      |      |      |      |      |      |       |      |     |     |      |       |      |      |      |      |       |     |       |       |       |     | 100  | 61    |              |
| SK4a   | 2        | 7     | 18       | Cal +              | 5.82  |      |       |       |      | 1.02 | 93.16 |      |      |      |      |      |      |       |      |     |     |      |       |      |      |      |      |       |     |       |       |       |     | 100  | 60    |              |
| SK4a   | 2        | 8     | 9        | Cal +              | 2.44  |      |       |       |      |      | 97.56 |      |      |      |      |      |      |       |      |     |     |      |       |      |      |      |      |       |     |       |       |       |     | 100  | 58    |              |
| SK4a   | 2        | 9     | 8        | Cal +              | 3.05  |      |       |       |      | 1.17 | 95.70 |      |      |      |      |      |      |       |      |     |     |      |       |      |      |      |      |       |     |       |       |       |     | 100  | 55    |              |
| SK4a   | 2        | 10    | 6        | Cal +              | 6.05  |      |       |       |      |      | 93.95 |      |      |      |      |      |      |       |      |     |     |      |       |      |      |      |      |       |     |       |       |       |     | 100  | 61    |              |
| SK5    | 2        | 16    | 9        | Cal +              | 12.17 |      |       |       |      | 0.83 | 87.01 |      |      |      |      |      |      |       |      |     |     |      |       |      |      |      |      |       |     |       |       |       |     | 100  | 58    |              |
| SK4a   | 2        | 5     | 31       | Cal + Brl + Qz     | 11.40 |      | 0.88  |       |      | 0.63 | 59.86 | 0.58 |      |      | 9.86 |      |      |       |      |     |     |      |       |      |      |      |      | 16.79 |     |       |       |       |     | 100  | 65    |              |
| SK4a   | 2        | 11    | 8        | Cal + Brl + Qz     | 3.41  |      |       |       |      |      | 75.82 |      |      |      | 6.70 |      |      |       |      |     |     |      |       |      |      |      |      | 14.07 |     |       |       |       |     | 100  | 65    |              |
| SK4a   | 2        | 11    | 9        | Cal + Brl + Qz     | 2.52  |      |       |       |      |      | 84.83 |      |      |      | 3.83 |      |      |       |      |     |     |      |       |      |      |      |      | 8.82  |     |       |       |       |     | 100  | 63    |              |
| SK4a   | 2        | 12    | 2        | Cal + Cal +        | 59.32 | 0.58 | 2.10  | 9.48  |      | 0.68 | 27.21 |      | 0.64 |      |      |      |      |       |      |     |     |      |       |      |      |      |      |       |     |       |       |       |     | 100  | 86    |              |
| SK5    | 2        | 8     | 14       | Cal + Feohy + Qz   | 4.85  |      |       | 43.42 |      | 1.27 | 50.46 |      |      |      |      |      |      |       |      |     |     |      |       |      |      |      |      |       |     |       |       |       |     | 100  | 64    |              |
| SK5    | 2        | 12    | 9        | Cal + Feohy + Qz   | 3.16  |      |       | 20.97 |      | 1.07 | 74.81 |      |      |      |      |      |      |       |      |     |     |      |       |      |      |      |      |       |     |       |       |       |     | 100  | 56    |              |
| SK5    | 2        | 17    | 5        | Cal + Feohy + Qz   | 9.41  |      |       | 39.45 |      |      | 51.13 |      |      |      |      |      |      |       |      |     |     |      |       |      |      |      |      |       |     |       |       |       |     | 100  | 59    |              |
| SK5    | 2        | 8     | 2        | Cal + Feohy + Qz + | 4.75  |      | 1.28  | 43.88 |      | 1.39 | 48.89 |      |      |      |      |      |      |       |      |     |     |      |       |      |      |      |      |       |     |       |       |       |     | 100  | 58    |              |
| SK5    | 2        | 2     | 5        | Cal + Gth +        | 9.73  |      | 1.12  | 42.01 |      | 1.66 | 45.49 |      |      |      |      |      |      |       |      |     |     |      |       |      |      |      |      |       |     |       |       |       |     | 100  | 68    |              |
| SK5    | 2        | 2     | 9        | Cal + Gth +        | 19.17 |      | 1.32  | 47.57 |      | 1.48 | 30.46 |      |      |      |      |      |      |       |      |     |     |      |       |      |      |      |      |       |     |       |       |       |     | 100  | 70    |              |
| SK5    | 2        | 17    | 13       | Cal + Gth +        | 18.70 |      | 1.90  | 26.75 |      |      | 52.65 |      |      |      |      |      |      |       |      |     |     |      |       |      |      |      |      |       |     |       |       |       |     | 100  | 67    |              |
| ARK2   | 1        | 1     | 10       | Cal + Qz           | 12.96 |      |       |       |      | 1.91 | 85.13 |      |      |      |      |      |      |       |      |     |     |      |       |      |      |      |      |       |     |       |       |       |     | 100  | 62    |              |
| ARK2   | 1        | 4     | 8        | Cal + Qz           | 34.30 |      |       | 0.68  |      | 1.25 | 63.78 |      |      |      |      |      |      |       |      |     |     |      |       |      |      |      |      |       |     |       |       |       |     | 100  | 71    |              |
| ARK2   | 1        | 7     | 2        | Cal + QZ           | 37.91 |      | 0.55  |       |      | 1.05 | 60.49 |      |      |      |      |      |      |       |      |     |     |      |       |      |      |      |      |       |     |       |       |       |     | 100  | 76    |              |
| ARK2   | 1        | 7     | 3        | Cal + Qz           | 38.93 |      |       |       |      | 1.02 | 60.06 |      |      |      |      |      |      |       |      |     |     |      |       |      |      |      |      |       |     |       |       |       |     | 100  | 75    |              |
| ARK2   | 1        | 7     | 9        | Cal + Qz           | 45.11 |      |       | 3.70  |      | 0.54 | 50.25 |      |      |      |      |      | 0.40 |       |      |     |     |      |       |      |      |      |      |       |     |       |       |       |     | 100  | 71    |              |
| ARK2   | 1        | 7     | 10       | Cal + Qz           | 64.60 |      |       |       |      | 0.49 | 34.91 |      |      |      |      |      |      |       |      |     |     |      |       |      |      |      |      |       |     |       |       |       |     | 100  | 84    |              |
| ARK2   | 1        | 7     | 12       | Cal + Qz           | 40.19 |      | 0.83  | 1.25  |      | 0.82 | 56.77 |      |      |      |      |      | 0.33 |       |      |     |     |      |       |      |      |      |      |       |     |       |       |       |     | 100  | 69    |              |
| ARK2   | 1        | 8     | 4        | Cal + Qz           | 18.86 |      | 0.57  |       |      | 1.64 | 78.93 |      |      |      |      |      |      |       |      |     |     |      |       |      |      |      |      |       |     |       |       |       |     | 100  | 63    |              |
| ARK2   | 1        | 8     | 7        | Cal + Qz           | 19.29 |      |       |       |      | 1.59 | 79.13 |      |      |      |      |      |      |       |      |     |     |      |       |      |      |      |      |       |     |       |       |       |     | 100  | 61    |              |
| ARK2   | 1        | 8     | 12       | Cal + Qz           | 15.49 |      | 1.11  | 1.30  |      | 2.73 | 79.00 |      | 0.38 |      |      |      |      |       |      |     |     |      |       |      |      |      |      |       |     |       |       |       | 100 | 58   |       |              |
| AX1A   | 1        | 1     | 5        | Cal + Qz           | 5.40  |      |       |       |      | 1.46 | 93.15 |      |      |      |      |      |      |       |      |     |     |      |       |      |      |      |      |       |     |       |       |       |     | 100  | 59    |              |
| AX1A   | 1        | 1     | 9        | Cal + Qz           | 15.18 |      | 1.82  |       |      |      | 81.94 |      | 1.06 |      |      |      |      |       |      |     |     |      |       |      |      |      |      |       |     |       |       |       |     | 100  | 65    |              |
| AX1A   | 1        | 2     | 4        | Cal + Qz           | 38.55 |      | 0.72  |       |      |      | 60.73 |      |      |      |      |      |      |       |      |     |     |      |       |      |      |      |      |       |     |       |       |       |     | 100  | 71    |              |
| AX1A   | 1        | 2     | 5        | Cal + Qz           | 11.82 |      |       |       |      | 0.64 | 87.53 |      |      |      |      |      |      |       |      |     |     |      |       |      |      |      |      |       |     |       |       |       |     | 100  | 62    |              |
| AX1A   | 1        | 3     | 8        | Cal + Qz           | 13.05 |      |       |       |      |      | 86.95 |      |      |      |      |      |      |       |      |     |     |      |       |      |      |      |      |       |     |       |       |       |     | 100  | 62    |              |
| AX1A   | 1        | 4     | 2        | Cal + Qz           | 38.11 |      |       |       |      |      | 61.89 |      |      |      |      |      |      |       |      |     |     |      |       |      |      |      |      |       |     |       |       |       |     | 100  | 73    |              |
| AX1A   | 1        | 4     | 11       | Cal + Qz           | 55.13 |      |       |       |      |      | 44.87 |      |      |      |      |      |      |       |      |     |     |      |       |      |      |      |      |       |     |       |       |       |     | 100  | 83    |              |
| AX1A   | 1        | 5     | 6        | Cal + Qz           | 13.82 |      |       |       |      |      | 86.18 |      |      |      |      |      |      |       |      |     |     |      |       |      |      |      |      |       |     |       |       |       |     | 100  | 61    |              |
| AX1A   | 1        | 6     | 2        | Cal + Qz           | 2     |      |       |       |      |      |       |      |      |      |      |      |      |       |      |     |     |      |       |      |      |      |      |       |     |       |       |       |     |      |       |              |



Supplementary Table S10: All EDS analyses by mineral

| Sample | Locality | Site   | Position | Mineral  | SiO2  | TiO2 | Al2O3 | FeO  | MnO  | MgO  | CaO   | Na2O | K2O  | P2O5 | SO3  | F    | Cl   | C2O3 | CoO | NiO | CrO | ZrO | As2O3 | ZnO2 | Ag2O | Ru2O | MnO3 | BaO | PbO | LuxO3 | Ca2O3 | Nd2O3 | VO3 | PO2 | Total | Actual Total |     |    |
|--------|----------|--------|----------|----------|-------|------|-------|------|------|------|-------|------|------|------|------|------|------|------|-----|-----|-----|-----|-------|------|------|------|------|-----|-----|-------|-------|-------|-----|-----|-------|--------------|-----|----|
| AX2    | 1        | 3      | 4        | Cal + Qz | 24.37 |      |       |      |      | 0.62 | 75.01 |      |      |      |      |      |      |      |     |     |     |     |       |      |      |      |      |     |     |       |       |       |     |     |       | 100          | 66  |    |
| AX2    | 1        | 3      | 5        | Cal + Qz | 38.48 |      |       |      |      |      | 61.52 |      |      |      |      |      |      |      |     |     |     |     |       |      |      |      |      |     |     |       |       |       |     |     |       |              | 100 | 75 |
| AX2    | 1        | 3      | 6        | Cal + Qz | 20.60 |      |       | 1.03 |      | 1.08 | 75.78 |      |      |      |      | 1.51 |      |      |     |     |     |     |       |      |      |      |      |     |     |       |       |       |     |     |       |              | 100 | 70 |
| AX2    | 1        | 4      | 4        | Cal + Qz | 48.48 |      |       | 0.78 |      |      | 50.75 |      |      |      |      |      |      |      |     |     |     |     |       |      |      |      |      |     |     |       |       |       |     |     |       |              | 100 | 76 |
| AX2    | 1        | 4      | 5        | Cal + Qz | 14.30 |      |       |      |      |      | 85.70 |      |      |      |      |      |      |      |     |     |     |     |       |      |      |      |      |     |     |       |       |       |     |     |       |              | 100 | 58 |
| AX2    | 1        | 4      | 7        | Cal + Qz | 16.94 |      |       |      |      | 1.02 | 82.04 |      |      |      |      |      |      |      |     |     |     |     |       |      |      |      |      |     |     |       |       |       |     |     |       |              | 100 | 60 |
| AX3    | 1        | 1      | 2        | Cal + Qz | 19.42 | 2.51 | 3.43  | 0.81 |      | 0.91 | 72.08 |      | 0.82 |      |      |      |      |      |     |     |     |     |       |      |      |      |      |     |     |       |       |       |     |     |       |              | 100 | 66 |
| AX3    | 1        | 1      | 7        | Cal + Qz | 3.90  |      |       |      |      |      | 96.10 |      |      |      |      |      |      |      |     |     |     |     |       |      |      |      |      |     |     |       |       |       |     |     |       |              | 100 | 55 |
| AX3    | 1        | 2      | 1        | Cal + Qz | 3.47  |      |       |      |      | 2.60 | 93.92 |      |      |      |      |      |      |      |     |     |     |     |       |      |      |      |      |     |     |       |       |       |     |     |       |              | 100 | 56 |
| AX3    | 1        | 2      | 3        | Cal + Qz | 2.63  |      |       |      |      | 1.39 | 95.98 |      |      |      |      |      |      |      |     |     |     |     |       |      |      |      |      |     |     |       |       |       |     |     |       |              | 100 | 58 |
| AX3    | 1        | 2      | 4        | Cal + Qz | 2.79  |      |       |      |      | 3.07 | 94.14 |      |      |      |      |      |      |      |     |     |     |     |       |      |      |      |      |     |     |       |       |       |     |     |       |              | 100 | 61 |
| AX3    | 1        | 4      | 6        | Cal + Qz | 3.22  |      |       |      |      | 0.76 | 96.02 |      |      |      |      |      |      |      |     |     |     |     |       |      |      |      |      |     |     |       |       |       |     |     |       |              | 100 | 54 |
| AX3    | 1        | 4      | 7        | Cal + Qz | 5.34  |      |       |      |      | 0.95 | 93.71 |      |      |      |      |      |      |      |     |     |     |     |       |      |      |      |      |     |     |       |       |       |     |     |       |              | 100 | 56 |
| AX3    | 1        | 11     | 4        | Cal + Qz | 40.36 |      |       |      |      | 1.18 | 58.46 |      |      |      |      |      |      |      |     |     |     |     |       |      |      |      |      |     |     |       |       |       |     |     |       |              | 100 | 69 |
| AX3    | 1        | 11     | 5        | Cal + Qz | 11.77 |      |       |      |      |      | 88.23 |      |      |      |      |      |      |      |     |     |     |     |       |      |      |      |      |     |     |       |       |       |     |     |       |              | 100 | 57 |
| AX3    | 1        | 11     | 6        | Cal + Qz | 39.83 |      | 0.66  | 0.49 |      | 0.67 | 58.34 |      |      |      |      |      |      |      |     |     |     |     |       |      |      |      |      |     |     |       |       |       |     |     |       |              | 100 | 71 |
| AX3    | 1        | 11     | 7        | Cal + Qz | 11.06 |      |       |      |      |      | 88.95 |      |      |      |      |      |      |      |     |     |     |     |       |      |      |      |      |     |     |       |       |       |     |     |       |              | 100 | 58 |
| AX3    | 1        | 11     | 9        | Cal + Qz | 2.63  |      |       |      | 0.76 | 0.63 | 95.30 |      |      |      |      |      |      |      |     |     |     |     |       |      |      |      |      |     |     |       |       |       |     |     |       |              | 100 | 54 |
| AX3    | 1        | 12     | 2        | Cal + Qz | 20.58 |      | 2.97  | 0.74 |      | 0.44 | 70.47 |      | 0.79 |      |      |      |      |      |     |     |     |     |       |      |      |      |      |     |     |       |       |       |     |     |       |              | 100 | 61 |
| AX3    | 1        | 12     | 3        | Cal + Qz | 29.29 |      |       |      |      | 1.27 | 69.43 |      |      |      |      |      |      |      |     |     |     |     |       |      |      |      |      |     |     |       |       |       |     |     |       |              | 100 | 63 |
| AX3    | 1        | 12     | 5        | Cal + Qz | 3.28  |      |       |      |      | 0.78 | 95.94 |      |      |      |      |      |      |      |     |     |     |     |       |      |      |      |      |     |     |       |       |       |     |     |       |              | 100 | 51 |
| AX3    | 1        | 12     | 6        | Cal + Qz | 34.50 |      |       |      |      | 0.78 | 64.72 |      |      |      |      |      |      |      |     |     |     |     |       |      |      |      |      |     |     |       |       |       |     |     |       |              | 100 | 68 |
| AX3    | 1        | 12     | 8        | Cal + Qz | 3.33  |      |       |      |      | 1.25 | 95.42 |      |      |      |      |      |      |      |     |     |     |     |       |      |      |      |      |     |     |       |       |       |     |     |       |              | 100 | 55 |
| AX3    | 1        | 13     | 3        | Cal + Qz | 6.08  |      |       |      |      |      | 93.92 |      |      |      |      |      |      |      |     |     |     |     |       |      |      |      |      |     |     |       |       |       |     |     |       |              | 100 | 55 |
| AX3    | 1        | 13     | 5        | Cal + Qz | 18.16 |      |       |      |      | 1.35 | 80.49 |      |      |      |      |      |      |      |     |     |     |     |       |      |      |      |      |     |     |       |       |       |     |     |       |              | 100 | 61 |
| AX3    | 1        | 13     | 6        | Cal + Qz | 28.05 |      |       |      |      | 0.97 | 70.99 |      |      |      |      |      |      |      |     |     |     |     |       |      |      |      |      |     |     |       |       |       |     |     |       |              | 100 | 60 |
| AX3    | 1        | 14     | 4        | Cal + Qz | 26.04 |      | 0.68  | 0.63 |      | 1.30 | 72.46 |      |      |      |      |      |      |      |     |     |     |     |       |      |      |      |      |     |     |       |       |       |     |     |       |              | 100 | 59 |
| AX3    | 1        | 14     | 5        | Cal + Qz | 12.33 |      |       |      |      | 0.92 | 82.16 | 1.59 | 1.08 |      | 1.06 |      | 0.86 |      |     |     |     |     |       |      |      |      |      |     |     |       |       |       |     |     |       |              | 100 | 49 |
| AX3    | 1        | 14     | 7        | Cal + Qz | 13.77 |      |       |      |      | 0.64 | 85.58 |      |      |      |      |      |      |      |     |     |     |     |       |      |      |      |      |     |     |       |       |       |     |     |       |              | 100 | 55 |
| AX3    | 1        | 15     | 4        | Cal + Qz | 49.58 |      |       |      |      | 0.51 | 49.91 |      |      |      |      |      |      |      |     |     |     |     |       |      |      |      |      |     |     |       |       |       |     |     |       |              | 100 | 75 |
| AX1B   | 1        | 11-6   | 3        | Cal + Qz | 34.85 |      |       |      |      | 0.68 | 64.47 |      |      |      |      |      |      |      |     |     |     |     |       |      |      |      |      |     |     |       |       |       |     |     |       |              | 100 | 67 |
| AX3    | 1        | 4 - 6  | 3        | Cal + Qz | 12.32 |      |       |      |      |      | 87.68 |      |      |      |      |      |      |      |     |     |     |     |       |      |      |      |      |     |     |       |       |       |     |     |       |              | 100 | 61 |
| AX3    | 1        | 4 - 6  | 4        | Cal + Qz | 2.87  |      |       |      |      |      | 97.13 |      |      |      |      |      |      |      |     |     |     |     |       |      |      |      |      |     |     |       |       |       |     |     |       |              | 100 | 57 |
| AX3    | 1        | 4 - 6  | 5        | Cal + Qz | 5.01  |      |       |      | 0.83 |      | 92.83 |      |      |      | 1.33 |      |      |      |     |     |     |     |       |      |      |      |      |     |     |       |       |       |     |     |       |              | 100 | 58 |
| AX3    | 1        | 4 - 6  | 6        | Cal + Qz | 36.11 |      |       |      |      |      | 63.89 |      |      |      |      |      |      |      |     |     |     |     |       |      |      |      |      |     |     |       |       |       |     |     |       |              | 100 | 74 |
| AX3    | 1        | 4 - 6  | 7        | Cal + Qz | 19.75 |      |       |      |      | 0.86 | 79.39 |      |      |      |      |      |      |      |     |     |     |     |       |      |      |      |      |     |     |       |       |       |     |     |       |              | 100 | 65 |
| AX3    | 1        | 4 - 6  | 12       | Cal + Qz | 70.03 |      |       |      |      |      | 29.97 |      |      |      |      |      |      |      |     |     |     |     |       |      |      |      |      |     |     |       |       |       |     |     |       |              | 100 | 92 |
| AX3    | 1        | 14 - 1 | 14       | Cal + Qz | 19.86 |      |       |      |      | 1.09 | 79.05 |      |      |      |      |      |      |      |     |     |     |     |       |      |      |      |      |     |     |       |       |       |     |     |       |              | 100 | 67 |
| SK4a   | 2        | 3      | 8        | Cal + Qz | 3.53  |      |       |      |      |      | 96.47 |      |      |      |      |      |      |      |     |     |     |     |       |      |      |      |      |     |     |       |       |       |     |     |       |              | 100 | 58 |
| SK4a   | 2        | 3      | 9        | Cal + Qz | 19.00 |      |       |      | 0.56 |      | 80.44 |      |      |      |      |      |      |      |     |     |     |     |       |      |      |      |      |     |     |       |       |       |     |     |       |              | 100 | 64 |
| SK4a   | 2        | 3      | 14       | Cal + Qz | 31.21 |      |       |      |      |      | 68.79 |      |      |      |      |      |      |      |     |     |     |     |       |      |      |      |      |     |     |       |       |       |     |     |       |              | 100 | 69 |
| SK4a   | 2        | 3      | 19       | Cal + Qz | 40.96 |      |       |      |      | 0.49 | 58.55 |      |      |      |      |      |      |      |     |     |     |     |       |      |      |      |      |     |     |       |       |       |     |     |       |              | 100 | 74 |
| SK4a   | 2        | 4      | 1        | Cal + Qz | 38.30 |      |       |      |      | 0.72 | 60.99 |      |      |      |      |      |      |      |     |     |     |     |       |      |      |      |      |     |     |       |       |       |     |     |       |              | 100 | 67 |
| SK4a   | 2        | 4      | 3        | Cal + Qz | 22.31 |      |       |      |      | 0.89 | 76.80 |      |      |      |      |      |      |      |     |     |     |     |       |      |      |      |      |     |     |       |       |       |     |     |       |              | 100 | 62 |
| SK4a   | 2        | 4      | 5        | Cal + Qz | 28.71 |      |       |      |      |      | 71.29 |      |      |      |      |      |      |      |     |     |     |     |       |      |      |      |      |     |     |       |       |       |     |     |       |              | 100 | 66 |
| SK4a   | 2        | 4      | 7        | Cal + Qz | 5.75  |      |       |      |      | 1.05 | 93.20 |      |      |      |      |      |      |      |     |     |     |     |       |      |      |      |      |     |     |       |       |       |     |     |       |              | 100 | 57 |
| SK4a   | 2        | 8      | 8        | Cal + Qz | 70.87 |      |       |      |      |      | 29.13 |      |      |      |      |      |      |      |     |     |     |     |       |      |      |      |      |     |     |       |       |       |     |     |       |              | 100 | 90 |
| SK4a   | 2        | 4      | 10       | Cal + Qz | 43.43 |      |       |      |      |      | 56.57 |      |      |      |      |      |      |      |     |     |     |     |       |      |      |      |      |     |     |       |       |       |     |     |       |              | 100 | 73 |
| SK4a   | 2        | 5      | 7        | Cal + Qz | 9.92  |      | 0.78  | 1.11 |      | 2.19 | 85.25 | 0.75 |      |      |      |      |      |      |     |     |     |     |       |      |      |      |      |     |     |       |       |       |     |     |       |              | 100 | 58 |
| SK4a   | 2        | 5      | 9        | Cal + Qz | 2.77  |      |       |      |      |      | 97.23 |      |      |      |      |      |      |      |     |     |     |     |       |      |      |      |      |     |     |       |       |       |     |     |       |              | 100 | 56 |
| SK4a   | 2        | 5      | 13       | Cal + Qz | 4.05  |      |       |      |      |      | 95.95 |      |      |      |      |      |      |      |     |     |     |     |       |      |      |      |      |     |     |       |       |       |     |     |       |              | 100 | 58 |
| SK4a   | 2        | 5      | 19       | Cal + Qz | 18.46 |      |       |      |      |      | 81.54 |      |      |      |      |      |      |      |     |     |     |     |       |      |      |      |      |     |     |       |       |       |     |     |       |              | 100 | 63 |
| SK4a   | 2        | 5      | 24       | Cal + Qz | 49.73 |      |       |      |      |      | 50.27 |      |      |      |      |      |      |      |     |     |     |     |       |      |      |      |      |     |     |       |       |       |     |     |       |              | 100 | 79 |
| SK4a   | 2        | 5      | 35       | Cal + Qz | 25.96 |      |       |      | 0.53 |      | 73.51 |      |      |      |      |      |      |      |     |     |     |     |       |      |      |      |      |     |     |       |       |       |     |     |       |              | 100 | 67 |
| SK4a   | 2        | 5      | 36       | Cal + Qz | 12.66 |      |       |      | 0.89 |      | 85.37 |      |      |      |      |      |      |      |     |     |     |     |       |      |      |      |      |     |     |       |       |       |     |     |       |              | 100 | 61 |
| SK4a   | 2        | 5      | 38       | Cal + Qz | 4.59  |      |       |      |      |      | 95.41 |      |      |      |      |      |      |      |     |     |     |     |       |      |      |      |      |     |     |       |       |       |     |     |       |              | 100 | 56 |
| SK4a   | 2        | 5      | 38       | Cal + Qz | 21.35 |      |       |      |      | 0.65 | 78.00 |      |      |      |      |      |      |      |     |     |     |     |       |      |      |      |      |     |     |       |       |       |     |     |       |              | 100 | 67 |
| SK4a   | 2        | 6      | 2        | Cal + Qz | 15.32 |      |       |      |      | 0.77 | 83.91 |      |      |      |      |      |      |      |     |     |     |     |       |      |      |      |      |     |     |       |       |       |     |     |       |              | 100 | 59 |
| SK4a   | 2        | 6      | 3        | Cal + Qz | 15.55 |      |       |      |      |      | 84.45 |      |      |      |      |      |      |      |     |     |     |     |       |      |      |      |      |     |     |       |       |       |     |     |       |              | 100 | 61 |
| SK4a   | 2        | 6      | 4        | Cal + Qz | 6.70  |      |       |      |      |      | 93.30 |      |      |      |      |      |      |      |     |     |     |     |       |      |      |      |      |     |     |       |       |       |     |     |       |              | 100 | 58 |
| SK4a   | 2        | 7      | 6        | Cal + Qz | 23.05 |      |       |      |      |      | 76.95 |      |      |      |      |      |      |      |     |     |     |     |       |      |      |      |      |     |     |       |       |       |     |     |       | </           |     |    |















Supplementary Table S10: All EDS analyses by mineral

| Sample | Locality | Site   | Position | Mineral | SiO2   | TiO2 | Al2O3 | FeO  | MnO | MgO | CaO  | Na2O | K2O  | P2O5 | SO3  | F | Cl   | Cr2O3 | CoO | NiO | CuO | ZnO | As2O3 | ZrO2 | Ag2O | Rb2O | MnO3 | BaO | PbO | Li2O3 | Cu2O3 | Nd2O3 | VO3 | PtO2 | Total | Actual Total |
|--------|----------|--------|----------|---------|--------|------|-------|------|-----|-----|------|------|------|------|------|---|------|-------|-----|-----|-----|-----|-------|------|------|------|------|-----|-----|-------|-------|-------|-----|------|-------|--------------|
| AX3    | 1        | 6      | 2        | Oz      | 98.44  |      |       | 0.60 |     |     |      |      |      |      | 0.96 |   |      |       |     |     |     |     |       |      |      |      |      |     |     |       |       |       |     | 100  | 115   |              |
| AX3    | 1        | 7      | 1        | Oz      | 100.00 |      |       |      |     |     |      |      |      |      |      |   |      |       |     |     |     |     |       |      |      |      |      |     |     |       |       |       |     | 100  | 113   |              |
| AX3    | 1        | 8      | 5        | Oz      | 100.00 |      |       |      |     |     |      |      |      |      |      |   |      |       |     |     |     |     |       |      |      |      |      |     |     |       |       |       |     | 100  | 112   |              |
| AX3    | 1        | 9      | 1        | Oz      | 99.40  |      |       | 0.60 |     |     |      |      |      |      |      |   |      |       |     |     |     |     |       |      |      |      |      |     |     |       |       |       |     | 100  | 111   |              |
| AX3    | 1        | 10     | 1        | Oz      | 100.00 |      |       |      |     |     |      |      |      |      |      |   |      |       |     |     |     |     |       |      |      |      |      |     |     |       |       |       |     | 100  | 111   |              |
| AX3    | 1        | 11     | 1        | Oz      | 100.00 |      |       |      |     |     |      |      |      |      |      |   |      |       |     |     |     |     |       |      |      |      |      |     |     |       |       |       |     | 100  | 106   |              |
| AX3    | 1        | 11     | 3        | Oz      | 100.00 |      |       |      |     |     |      |      |      |      |      |   |      |       |     |     |     |     |       |      |      |      |      |     |     |       |       |       |     | 100  | 110   |              |
| AX3    | 1        | 11     | 8        | Oz      | 100.00 |      |       |      |     |     |      |      |      |      |      |   |      |       |     |     |     |     |       |      |      |      |      |     |     |       |       |       |     | 100  | 113   |              |
| AX3    | 1        | 12     | 1        | Oz      | 99.39  |      | 0.61  |      |     |     |      |      |      |      |      |   |      |       |     |     |     |     |       |      |      |      |      |     |     |       |       |       |     | 100  | 109   |              |
| AX3    | 1        | 13     | 1        | Oz      | 100.00 |      |       |      |     |     |      |      |      |      |      |   |      |       |     |     |     |     |       |      |      |      |      |     |     |       |       |       |     | 100  | 107   |              |
| AX3    | 1        | 14     | 8        | Oz      | 99.65  |      |       |      |     |     | 0.35 |      |      |      |      |   |      |       |     |     |     |     |       |      |      |      |      |     |     |       |       |       |     | 100  | 103   |              |
| AX3    | 1        | 14     | 9        | Oz      | 99.79  |      |       |      |     |     | 0.21 |      |      |      |      |   |      |       |     |     |     |     |       |      |      |      |      |     |     |       |       |       |     | 100  | 101   |              |
| AX3    | 1        | 14     | 10       | Oz      | 97.52  |      |       |      |     |     | 2.48 |      |      |      |      |   |      |       |     |     |     |     |       |      |      |      |      |     |     |       |       |       |     | 100  | 106   |              |
| AX3    | 1        | 15     | 5        | Oz      | 99.73  |      |       |      |     |     | 0.27 |      |      |      |      |   |      |       |     |     |     |     |       |      |      |      |      |     |     |       |       |       |     | 100  | 104   |              |
| AX3    | 1        | 15     | 6        | Oz      | 99.59  |      |       |      |     |     | 0.41 |      |      |      |      |   |      |       |     |     |     |     |       |      |      |      |      |     |     |       |       |       |     | 100  | 102   |              |
| AX3    | 1        | 15     | 7        | Oz      | 99.50  |      |       |      |     |     | 0.50 |      |      |      |      |   |      |       |     |     |     |     |       |      |      |      |      |     |     |       |       |       |     | 100  | 106   |              |
| AX1B   | 1        | 5-4,10 | 6        | Oz      | 100.00 |      |       |      |     |     |      |      |      |      |      |   |      |       |     |     |     |     |       |      |      |      |      |     |     |       |       |       |     | 100  | 118   |              |
| AX1B   | 1        | 5-7    | 1        | Oz      | 100.00 |      |       |      |     |     |      |      |      |      |      |   |      |       |     |     |     |     |       |      |      |      |      |     |     |       |       |       |     | 100  | 117   |              |
| AX1B   | 1        | 5-7    | 12       | Oz      | 100.00 |      |       |      |     |     |      |      |      |      |      |   |      |       |     |     |     |     |       |      |      |      |      |     |     |       |       |       |     | 100  | 118   |              |
| AX1B   | 1        | 6-7    | 1        | Oz      | 100.00 |      |       |      |     |     |      |      |      |      |      |   |      |       |     |     |     |     |       |      |      |      |      |     |     |       |       |       |     | 100  | 120   |              |
| AX1B   | 1        | 6-8    | 1        | Oz      | 100.00 |      |       |      |     |     |      |      |      |      |      |   |      |       |     |     |     |     |       |      |      |      |      |     |     |       |       |       |     | 100  | 120   |              |
| AX1B   | 1        | 7-4,6  | 1        | Oz      | 100.00 |      |       |      |     |     |      |      |      |      |      |   |      |       |     |     |     |     |       |      |      |      |      |     |     |       |       |       |     | 100  | 120   |              |
| AX1B   | 1        | 7-4,6  | 19       | Oz      | 100.00 |      |       |      |     |     |      |      |      |      |      |   |      |       |     |     |     |     |       |      |      |      |      |     |     |       |       |       |     | 100  | 120   |              |
| AX1B   | 1        | 7-3,5  | 1        | Oz      | 99.53  |      | 0.47  |      |     |     |      |      |      |      |      |   |      |       |     |     |     |     |       |      |      |      |      |     |     |       |       |       |     | 100  | 112   |              |
| AX1B   | 1        | 7-3,5  | 2        | Oz      | 100.00 |      |       |      |     |     |      |      |      |      |      |   |      |       |     |     |     |     |       |      |      |      |      |     |     |       |       |       |     | 100  | 120   |              |
| AX1B   | 1        | 7-3,5  | 17       | Oz      | 100.00 |      |       |      |     |     |      |      |      |      |      |   |      |       |     |     |     |     |       |      |      |      |      |     |     |       |       |       |     | 100  | 116   |              |
| AX1B   | 1        | 7-3,5  | 25       | Oz      | 99.46  |      | 0.54  |      |     |     |      |      |      |      |      |   |      |       |     |     |     |     |       |      |      |      |      |     |     |       |       |       |     | 100  | 119   |              |
| AX1B   | 1        | 8-4,5  | 1        | Oz      | 100.00 |      |       |      |     |     |      |      |      |      |      |   |      |       |     |     |     |     |       |      |      |      |      |     |     |       |       |       |     | 100  | 120   |              |
| AX1B   | 1        | 9-3,4  | 1        | Oz      | 100.00 |      |       |      |     |     |      |      |      |      |      |   |      |       |     |     |     |     |       |      |      |      |      |     |     |       |       |       |     | 100  | 121   |              |
| AX1B   | 1        | 9-5    | 1        | Oz      | 100.00 |      |       |      |     |     |      |      |      |      |      |   |      |       |     |     |     |     |       |      |      |      |      |     |     |       |       |       |     | 100  | 119   |              |
| AX1B   | 1        | 11-6   | 2        | Oz      | 100.00 |      |       |      |     |     |      |      |      |      |      |   |      |       |     |     |     |     |       |      |      |      |      |     |     |       |       |       |     | 100  | 113   |              |
| AX1B   | 1        | 11-6   | 7        | Oz      | 99.51  |      |       |      |     |     | 0.49 |      |      |      |      |   |      |       |     |     |     |     |       |      |      |      |      |     |     |       |       |       |     | 100  | 111   |              |
| AX3    | 1        | 3-3    | 1        | Oz      | 100.00 |      |       |      |     |     |      |      |      |      |      |   |      |       |     |     |     |     |       |      |      |      |      |     |     |       |       |       |     | 100  | 118   |              |
| AX3    | 1        | 3-3    | 12       | Oz      | 100.00 |      |       |      |     |     |      |      |      |      |      |   |      |       |     |     |     |     |       |      |      |      |      |     |     |       |       |       |     | 100  | 116   |              |
| AX3    | 1        | 3-6    | 2        | Oz      | 100.00 |      |       |      |     |     |      |      |      |      |      |   |      |       |     |     |     |     |       |      |      |      |      |     |     |       |       |       |     | 100  | 116   |              |
| AX3    | 1        | 3-6    | 9        | Oz      | 100.00 |      |       |      |     |     |      |      |      |      |      |   |      |       |     |     |     |     |       |      |      |      |      |     |     |       |       |       |     | 100  | 118   |              |
| AX3    | 1        | 3-6    | 18       | Oz      | 100.00 |      |       |      |     |     |      |      |      |      |      |   |      |       |     |     |     |     |       |      |      |      |      |     |     |       |       |       |     | 100  | 117   |              |
| AX3    | 1        | 3-6    | 19       | Oz      | 100.00 |      |       |      |     |     |      |      |      |      |      |   |      |       |     |     |     |     |       |      |      |      |      |     |     |       |       |       |     | 100  | 111   |              |
| AX3    | 1        | 3-6    | 20       | Oz      | 100.00 |      |       |      |     |     |      |      |      |      |      |   |      |       |     |     |     |     |       |      |      |      |      |     |     |       |       |       |     | 100  | 109   |              |
| AX3    | 1        | 3-6    | 21       | Oz      | 98.20  |      |       |      |     |     |      |      |      |      |      |   |      |       |     |     |     |     |       |      |      |      |      |     |     |       |       |       |     | 100  | 96    |              |
| AX3    | 1        | 4-6    | 9        | Oz      | 100.00 |      |       |      |     |     |      |      | 0.45 |      | 0.95 |   | 0.40 |       |     |     |     |     |       |      |      |      |      |     |     |       |       |       | 100 | 106  |       |              |
| AX3    | 1        | 4-8    | 10       | Oz      | 100.00 |      |       |      |     |     |      |      |      |      |      |   |      |       |     |     |     |     |       |      |      |      |      |     |     |       |       |       | 100 | 117  |       |              |
| AX3    | 1        | 4-6    | 11       | Oz      | 100.00 |      |       |      |     |     |      |      |      |      |      |   |      |       |     |     |     |     |       |      |      |      |      |     |     |       |       |       |     | 100  | 117   |              |
| SK4a   | 2        | 1      | 1        | Oz      | 100.00 |      |       |      |     |     |      |      |      |      |      |   |      |       |     |     |     |     |       |      |      |      |      |     |     |       |       |       |     | 100  | 116   |              |
| SK4a   | 2        | 1      | 12       | Oz      | 99.49  |      | 0.51  |      |     |     |      |      |      |      |      |   |      |       |     |     |     |     |       |      |      |      |      |     |     |       |       |       |     | 100  | 117   |              |
| SK4a   | 2        | 2      | 1        | Oz      | 100.00 |      |       |      |     |     |      |      |      |      |      |   |      |       |     |     |     |     |       |      |      |      |      |     |     |       |       |       |     | 100  | 116   |              |
| SK4a   | 2        | 2      | 4        | Oz      | 99.51  |      |       |      |     |     | 0.49 |      |      |      |      |   |      |       |     |     |     |     |       |      |      |      |      |     |     |       |       |       |     | 100  | 121   |              |
| SK4a   | 2        | 2      | 9        | Oz      | 100.00 |      |       |      |     |     |      |      |      |      |      |   |      |       |     |     |     |     |       |      |      |      |      |     |     |       |       |       |     | 100  | 123   |              |
| SK4a   | 2        | 3      | 21       | Oz      | 100.00 |      |       |      |     |     |      |      |      |      |      |   |      |       |     |     |     |     |       |      |      |      |      |     |     |       |       |       |     | 100  | 115   |              |
| SK4a   | 2        | 3      | 22       | Oz      | 100.00 |      |       |      |     |     |      |      |      |      |      |   |      |       |     |     |     |     |       |      |      |      |      |     |     |       |       |       |     | 100  | 120   |              |
| SK4a   | 2        | 4      | 15       | Oz      | 100.00 |      |       |      |     |     |      |      |      |      |      |   |      |       |     |     |     |     |       |      |      |      |      |     |     |       |       |       |     | 100  | 118   |              |
| SK4a   | 2        | 5      | 1        | Oz      | 100.00 |      |       |      |     |     |      |      |      |      |      |   |      |       |     |     |     |     |       |      |      |      |      |     |     |       |       |       |     | 100  | 100   |              |
| SK4a   | 2        | 5      | 2        | Oz      | 100.00 |      |       |      |     |     |      |      |      |      |      |   |      |       |     |     |     |     |       |      |      |      |      |     |     |       |       |       |     | 100  | 110   |              |
| SK4a   | 2        | 5      | 3        | Oz      | 100.00 |      |       |      |     |     |      |      |      |      |      |   |      |       |     |     |     |     |       |      |      |      |      |     |     |       |       |       |     | 100  | 94    |              |
| SK4a   | 2        | 5      | 33       | Oz      | 100.00 |      |       |      |     |     |      |      |      |      |      |   |      |       |     |     |     |     |       |      |      |      |      |     |     |       |       |       |     | 100  | 115   |              |
| SK4a   | 2        | 5      | 34       | Oz      | 100.00 |      |       |      |     |     |      |      |      |      |      |   |      |       |     |     |     |     |       |      |      |      |      |     |     |       |       |       |     | 100  | 117   |              |
| SK4a   | 2        | 6      | 6        | Oz      | 100.00 |      |       |      |     |     |      |      |      |      |      |   |      |       |     |     |     |     |       |      |      |      |      |     |     |       |       |       |     | 100  | 119   |              |
| SK4a   | 2        | 7      | 1        | Oz      | 100.00 |      |       |      |     |     |      |      |      |      |      |   |      |       |     |     |     |     |       |      |      |      |      |     |     |       |       |       |     | 100  | 116   |              |
| SK4a   | 2        | 7      | 19       | Oz      | 100.00 |      |       |      |     |     |      |      |      |      |      |   |      |       |     |     |     |     |       |      |      |      |      |     |     |       |       |       |     | 100  | 119   |              |
| SK4a   | 2        | 7      | 20       | Oz      | 99.31  |      |       |      |     |     | 0.69 |      |      |      |      |   |      |       |     |     |     |     |       |      |      |      |      |     |     |       |       |       |     | 100  | 117   |              |
| SK4a   | 2        | 8      | 5        | Oz      | 98.61  |      | 0.96  |      |     |     |      |      | 0.23 |      |      |   |      |       |     |     |     |     |       |      |      |      |      |     |     |       |       |       | 100 | 115  |       |              |
| SK4a   | 2        | 8      | 6        | Oz      | 98.85  |      | 0.92  |      |     |     |      |      | 0.23 |      |      |   |      |       |     |     |     |     |       |      |      |      |      |     |     |       |       |       | 100 | 109  |       |              |
| SK4a   | 2        | 8      | 7        | Oz      | 98.55  |      | 0.66  | 0.79 |     |     |      |      |      |      |      |   |      |       |     |     |     |     |       |      |      |      |      |     |     |       |       |       | 100 | 104  |       |              |
| SK4a   | 2        | 8      | 10       | Oz      | 100.00 |      |       |      |     |     |      |      |      |      |      |   |      |       |     |     |     |     |       |      |      |      |      |     |     |       |       |       |     | 100  | 117   |              |
| SK4a   | 2        | 9      | 7        | Oz      | 99.38  |      |       |      |     |     | 0.62 |      |      |      |      |   |      |       |     |     |     |     |       |      |      |      |      |     |     |       |       |       |     | 100  | 112   |              |
| SK4a   | 2        | 9      | 10       | Oz      | 100.00 |      |       |      |     |     |      |      |      |      |      |   |      |       |     |     |     |     |       |      |      |      |      |     |     |       |       |       |     | 100  | 110   |              |
| SK4a   | 2        | 10     | 1        | Oz      | 100.00 |      |       |      |     |     |      |      |      |      |      |   |      |       |     |     |     |     |       |      |      |      |      |     |     |       |       |       |     | 100  | 112   |              |
| SK4a   | 2        | 10     | 7        | Oz      | 99.54  |      |       |      |     |     | 0.46 |      |      |      |      |   |      |       |     |     |     |     |       |      |      |      |      |     |     |       |       |       |     |      |       |              |

Supplementary Table S10: All EDS analyses by mineral

| Sample Locality | Site | Position | Mineral | SiO2   | TiO2 | Al2O3 | FeO | MnO | MgO | CaO  | Na2O | K2O | P2O5 | SO3 | F | Cl | Cr2O3 | CuO | NiO | CuO | ZrO | As2O3 | ZrO2 | Ag2O | Ru2O | MnO3 | BaO | PbO | LapO3 | Ce2O3 | Nd2O3 | VO3 | PhO2 | Total | Actual Total |
|-----------------|------|----------|---------|--------|------|-------|-----|-----|-----|------|------|-----|------|-----|---|----|-------|-----|-----|-----|-----|-------|------|------|------|------|-----|-----|-------|-------|-------|-----|------|-------|--------------|
| SK5             | 2    | 5        | 21 Oz   | 99.66  |      |       |     |     |     | 0.34 |      |     |      |     |   |    |       |     |     |     |     |       |      |      |      |      |     |     |       |       |       |     | 100  | 107   |              |
| SK5             | 2    | 5        | 22 Oz   | 100.00 |      |       |     |     |     |      |      |     |      |     |   |    |       |     |     |     |     |       |      |      |      |      |     |     |       |       |       |     | 100  | 110   |              |
| SK5             | 2    | 5        | 23 Oz   | 100.00 |      |       |     |     |     |      |      |     |      |     |   |    |       |     |     |     |     |       |      |      |      |      |     |     |       |       |       |     | 100  | 111   |              |
| SK5             | 2    | 6        | 1 Oz    | 100.00 |      |       |     |     |     |      |      |     |      |     |   |    |       |     |     |     |     |       |      |      |      |      |     |     |       |       |       |     | 100  | 115   |              |
| SK5             | 2    | 6        | 10 Oz   | 100.00 |      |       |     |     |     |      |      |     |      |     |   |    |       |     |     |     |     |       |      |      |      |      |     |     |       |       |       |     | 100  | 114   |              |
| SK5             | 2    | 6        | 14 Oz   | 100.00 |      |       |     |     |     |      |      |     |      |     |   |    |       |     |     |     |     |       |      |      |      |      |     |     |       |       |       |     | 100  | 108   |              |
| SK5             | 2    | 6        | 15 Oz   | 100.00 |      |       |     |     |     |      |      |     |      |     |   |    |       |     |     |     |     |       |      |      |      |      |     |     |       |       |       |     | 100  | 112   |              |
| SK5             | 2    | 7        | 10 Oz   | 99.04  |      |       |     |     |     | 0.96 |      |     |      |     |   |    |       |     |     |     |     |       |      |      |      |      |     |     |       |       |       |     | 100  | 106   |              |
| SK5             | 2    | 7        | 11 Oz   | 99.08  |      |       |     |     |     | 0.92 |      |     |      |     |   |    |       |     |     |     |     |       |      |      |      |      |     |     |       |       |       |     | 100  | 106   |              |
| SK5             | 2    | 7        | 12 Oz   | 100.00 |      |       |     |     |     |      |      |     |      |     |   |    |       |     |     |     |     |       |      |      |      |      |     |     |       |       |       |     | 100  | 107   |              |
| SK5             | 2    | 7        | 14 Oz   | 99.72  |      |       |     |     |     | 0.28 |      |     |      |     |   |    |       |     |     |     |     |       |      |      |      |      |     |     |       |       |       |     | 100  | 110   |              |
| SK5             | 2    | 7        | 16 Oz   | 99.51  |      |       |     |     |     | 0.49 |      |     |      |     |   |    |       |     |     |     |     |       |      |      |      |      |     |     |       |       |       |     | 100  | 112   |              |
| SK5             | 2    | 10       | 1 Oz    | 99.54  |      |       |     |     |     | 0.46 |      |     |      |     |   |    |       |     |     |     |     |       |      |      |      |      |     |     |       |       |       |     | 100  | 109   |              |
| SK5             | 2    | 10       | 16 Oz   | 99.33  |      |       |     |     |     | 0.67 |      |     |      |     |   |    |       |     |     |     |     |       |      |      |      |      |     |     |       |       |       |     | 100  | 111   |              |
| SK5             | 2    | 11       | 2 Oz    | 99.26  |      |       |     |     |     | 0.74 |      |     |      |     |   |    |       |     |     |     |     |       |      |      |      |      |     |     |       |       |       |     | 100  | 108   |              |
| SK5             | 2    | 11       | 10 Oz   | 100.00 |      |       |     |     |     |      |      |     |      |     |   |    |       |     |     |     |     |       |      |      |      |      |     |     |       |       |       |     | 100  | 113   |              |
| SK5             | 2    | 11       | 12 Oz   | 100.00 |      |       |     |     |     |      |      |     |      |     |   |    |       |     |     |     |     |       |      |      |      |      |     |     |       |       |       |     | 100  | 113   |              |
| SK5             | 2    | 11       | 17 Oz   | 99.69  |      |       |     |     |     | 0.31 |      |     |      |     |   |    |       |     |     |     |     |       |      |      |      |      |     |     |       |       |       |     | 100  | 111   |              |
| SK5             | 2    | 14       | 12 Oz   | 99.77  |      |       |     |     |     | 0.23 |      |     |      |     |   |    |       |     |     |     |     |       |      |      |      |      |     |     |       |       |       |     | 100  | 109   |              |
| SK5             | 2    | 14       | 34 Oz   | 100.00 |      |       |     |     |     |      |      |     |      |     |   |    |       |     |     |     |     |       |      |      |      |      |     |     |       |       |       |     | 100  | 111   |              |
| SK5             | 2    | 14       | 35 Oz   | 100.00 |      |       |     |     |     |      |      |     |      |     |   |    |       |     |     |     |     |       |      |      |      |      |     |     |       |       |       |     | 100  | 110   |              |
| SK5             | 2    | 15       | 1 Oz    | 99.42  |      | 0.58  |     |     |     |      |      |     |      |     |   |    |       |     |     |     |     |       |      |      |      |      |     |     |       |       |       |     | 100  | 103   |              |
| SK5             | 2    | 15       | 4 Oz    | 100    |      |       |     |     |     |      |      |     |      |     |   |    |       |     |     |     |     |       |      |      |      |      |     |     |       |       |       |     |      |       |              |

Supplementary Table S10: All EDS analyses by mineral

| Sample | Locality | Site  | Position | Mineral      | SiO2  | TiO2 | Al2O3 | FeO   | MnO   | MgO  | CaO   | Na2O | K2O  | P2O5 | SO3  | F | Cl   | Cr2O3 | CoO | NiO | CuO  | ZnO  | As2O3 | ZrO2 | Ag2O | Rb2O | MnO3 | BaO | PbO | Li2O3 | Cu2O3 | Nd2O3 | VO3 | PbO2 | Total | Actual Total |
|--------|----------|-------|----------|--------------|-------|------|-------|-------|-------|------|-------|------|------|------|------|---|------|-------|-----|-----|------|------|-------|------|------|------|------|-----|-----|-------|-------|-------|-----|------|-------|--------------|
| AX1C   | 1        | 2     | 6        | Oz + Cal     | 55.06 |      |       |       |       |      | 44.92 |      |      |      |      |   |      |       |     |     |      |      |       |      |      |      |      |     |     |       |       |       |     | 100  | 86    |              |
| AX1C   | 1        | 3     | 6        | Oz + Cal     | 66.25 |      |       |       |       |      | 33.75 |      |      |      |      |   |      |       |     |     |      |      |       |      |      |      |      |     |     |       |       |       |     | 100  | 88    |              |
| AX1C   | 1        | 3     | 9        | Oz + Cal     | 86.17 |      |       |       |       |      | 13.83 |      |      |      |      |   |      |       |     |     |      |      |       |      |      |      |      |     |     |       |       |       |     | 100  | 101   |              |
| AX1C   | 1        | 3     | 10       | Oz + Cal     | 81.02 |      |       |       |       |      | 18.98 |      |      |      |      |   |      |       |     |     |      |      |       |      |      |      |      |     |     |       |       |       |     | 100  | 96    |              |
| AX1C   | 1        | 3     | 11       | Oz + Cal     | 87.51 |      |       |       |       |      | 12.49 |      |      |      |      |   |      |       |     |     |      |      |       |      |      |      |      |     |     |       |       |       |     | 100  | 108   |              |
| AX1C   | 1        | 6     | 10       | Oz + Cal     | 55.04 |      |       |       |       |      | 44.96 |      |      |      |      |   |      |       |     |     |      |      |       |      |      |      |      |     |     |       |       |       |     | 100  | 86    |              |
| AX1C   | 1        | 3a    | 8        | Oz + Cal     | 95.16 |      |       | 1.01  |       |      | 3.83  |      |      |      |      |   |      |       |     |     |      |      |       |      |      |      |      |     |     |       |       |       |     | 100  | 49    |              |
| AX1C   | 1        | 3a    | 9        | Oz + Cal     | 88.40 |      |       | 1.83  |       |      | 9.77  |      |      |      |      |   |      |       |     |     |      |      |       |      |      |      |      |     |     |       |       |       |     | 100  | 21    |              |
| AX1C   | 1        | 5a    | 5        | Oz + Cal     | 68.93 |      |       |       |       |      | 31.07 |      |      |      |      |   |      |       |     |     |      |      |       |      |      |      |      |     |     |       |       |       |     | 100  | 88    |              |
| AX2    | 1        | 1     | 4        | Oz + Cal     | 86.50 |      |       | 0.36  |       |      | 13.14 |      |      |      |      |   |      |       |     |     |      |      |       |      |      |      |      |     |     |       |       |       |     | 100  | 108   |              |
| AX3    | 1        | 13    | 4        | Oz + Cal     | 56.36 |      |       |       |       | 0.47 | 43.17 |      |      |      |      |   |      |       |     |     |      |      |       |      |      |      |      |     |     |       |       |       |     | 100  | 81    |              |
| AX1B   | 1        | 7-3.5 | 7        | Oz + Cal     | 81.43 |      |       |       |       |      | 38.57 |      |      |      |      |   |      |       |     |     |      |      |       |      |      |      |      |     |     |       |       |       |     | 100  | 89    |              |
| AX3    | 1        | 14-1  | 17       | Oz + Cal     | 93.86 |      |       |       |       |      | 6.14  |      |      |      |      |   |      |       |     |     |      |      |       |      |      |      |      |     |     |       |       |       |     | 100  | 118   |              |
| SK4a   | 2        | 3     | 1        | Oz + Cal     | 69.50 |      |       |       |       |      | 30.50 |      |      |      |      |   |      |       |     |     |      |      |       |      |      |      |      |     |     |       |       |       |     | 100  | 87    |              |
| SK4a   | 2        | 4     | 2        | Oz + Cal     | 93.78 |      |       |       |       |      | 6.22  |      |      |      |      |   |      |       |     |     |      |      |       |      |      |      |      |     |     |       |       |       |     | 100  | 104   |              |
| SK4a   | 2        | 4     | 6        | Oz + Cal     | 85.66 |      |       |       |       |      | 14.34 |      |      |      |      |   |      |       |     |     |      |      |       |      |      |      |      |     |     |       |       |       |     | 100  | 99    |              |
| SK4a   | 2        | 4     | 14       | Oz + Cal     | 97.86 |      |       |       |       |      | 2.14  |      |      |      |      |   |      |       |     |     |      |      |       |      |      |      |      |     |     |       |       |       |     | 100  | 113   |              |
| SK4a   | 2        | 8     | 3        | Oz + Cal     | 78.82 |      |       |       |       |      | 21.18 |      |      |      |      |   |      |       |     |     |      |      |       |      |      |      |      |     |     |       |       |       |     | 100  | 96    |              |
| SK4a   | 2        | 9     | 12       | Oz + Cal     | 90.74 |      |       |       |       |      | 9.26  |      |      |      |      |   |      |       |     |     |      |      |       |      |      |      |      |     |     |       |       |       |     | 100  | 96    |              |
| SK4a   | 2        | 11    | 11       | Oz + Cal     | 51.93 |      |       |       |       |      | 48.07 |      |      |      |      |   |      |       |     |     |      |      |       |      |      |      |      |     |     |       |       |       |     | 100  | 82    |              |
| SK4a   | 2        | 11    | 12       | Oz + Cal     | 96.23 |      | 0.90  |       |       |      | 2.66  |      | 0.22 |      |      |   |      |       |     |     |      |      |       |      |      |      |      |     |     |       |       |       |     | 100  | 107   |              |
| SK4a   | 2        | 11    | 13       | Oz + Cal     | 92.78 |      | 0.60  | 0.44  |       |      | 6.18  |      |      |      |      |   |      |       |     |     |      |      |       |      |      |      |      |     |     |       |       |       |     | 100  | 103   |              |
| SK4a   | 2        | 11    | 16       | Oz + Cal     | 79.76 |      |       |       |       |      | 20.24 |      |      |      |      |   |      |       |     |     |      |      |       |      |      |      |      |     |     |       |       |       |     | 100  | 101   |              |
| SK4a   | 2        | 11    | 17       | Oz + Cal     | 93.95 |      |       |       |       |      | 6.05  |      |      |      |      |   |      |       |     |     |      |      |       |      |      |      |      |     |     |       |       |       |     | 100  | 108   |              |
| SK5    | 2        | 5     | 7        | Oz + Cal     | 55.23 |      |       |       |       |      | 44.77 |      |      |      |      |   |      |       |     |     |      |      |       |      |      |      |      |     |     |       |       |       |     | 100  | 75    |              |
| SK5    | 2        | 5     | 15       | Oz + Cal     | 52.78 |      |       |       |       |      | 47.22 |      |      |      |      |   |      |       |     |     |      |      |       |      |      |      |      |     |     |       |       |       |     | 100  | 76    |              |
| SK5    | 2        | 7     | 22       | Oz + Cal     | 97.97 |      |       |       |       |      | 2.03  |      |      |      |      |   |      |       |     |     |      |      |       |      |      |      |      |     |     |       |       |       |     | 100  | 107   |              |
| SK5    | 2        | 7     | 24       | Oz + Cal     | 65.50 |      |       |       |       |      | 34.50 |      |      |      |      |   |      |       |     |     |      |      |       |      |      |      |      |     |     |       |       |       |     | 100  | 72    |              |
| SK5    | 2        | 8     | 6        | Oz + Cal     | 55.96 |      |       |       |       |      | 44.04 |      |      |      |      |   |      |       |     |     |      |      |       |      |      |      |      |     |     |       |       |       |     | 100  | 78    |              |
| SK5    | 2        | 9     | 7        | Oz + Cal     | 96.16 |      |       |       |       |      | 3.84  |      |      |      |      |   |      |       |     |     |      |      |       |      |      |      |      |     |     |       |       |       |     | 100  | 102   |              |
| SK5    | 2        | 9     | 11       | Oz + Cal     | 68.37 |      |       |       |       |      | 31.63 |      |      |      |      |   |      |       |     |     |      |      |       |      |      |      |      |     |     |       |       |       |     | 100  | 72    |              |
| SK5    | 2        | 10    | 15       | Oz + Cal     | 95.92 |      |       |       |       |      | 4.08  |      |      |      |      |   |      |       |     |     |      |      |       |      |      |      |      |     |     |       |       |       |     | 100  | 105   |              |
| SK5    | 2        | 12    | 12       | Oz + Cal     | 89.72 |      | 0.82  |       |       |      | 9.24  |      | 0.22 |      |      |   |      |       |     |     |      |      |       |      |      |      |      |     |     |       |       |       |     | 100  | 99    |              |
| SK5    | 2        | 12    | 13       | Oz + Cal     | 91.42 |      | 0.91  |       |       |      | 7.67  |      |      |      |      |   |      |       |     |     |      |      |       |      |      |      |      |     |     |       |       |       |     | 100  | 98    |              |
| SK5    | 2        | 13    | 34       | Oz + Cal     | 97.62 |      |       |       |       |      | 2.38  |      |      |      |      |   |      |       |     |     |      |      |       |      |      |      |      |     |     |       |       |       |     | 100  | 101   |              |
| SK5    | 2        | 14    | 5        | Oz + Cal     | 80.31 |      |       |       |       |      | 19.69 |      |      |      |      |   |      |       |     |     |      |      |       |      |      |      |      |     |     |       |       |       |     | 100  | 90    |              |
| SK5    | 2        | 14    | 6        | Oz + Cal     | 98.37 |      |       |       |       |      | 1.63  |      |      |      |      |   |      |       |     |     |      |      |       |      |      |      |      |     |     |       |       |       |     | 100  | 107   |              |
| SK5    | 2        | 14    | 20       | Oz + Cal     | 56.81 |      |       |       |       | 0.53 | 42.66 |      |      |      |      |   |      |       |     |     |      |      |       |      |      |      |      |     |     |       |       |       |     | 100  | 81    |              |
| SK5    | 2        | 14    | 33       | Oz + Cal     | 95.27 |      |       |       |       |      | 4.73  |      |      |      |      |   |      |       |     |     |      |      |       |      |      |      |      |     |     |       |       |       |     | 100  | 97    |              |
| SK5    | 2        | 15    | 3        | Oz + Cal     | 97.87 |      |       |       |       |      | 2.13  |      |      |      |      |   |      |       |     |     |      |      |       |      |      |      |      |     |     |       |       |       |     | 100  | 101   |              |
| SK5    | 2        | 16    | 5        | Oz + Cal     | 92.52 |      | 0.60  | 1.71  |       |      | 4.69  |      |      |      |      |   | 0.49 |       |     |     |      |      |       |      |      |      |      |     |     |       |       |       |     | 100  | 60    |              |
| SK5    | 2        | 16    | 6        | Oz + Cal     | 95.73 |      |       |       |       |      | 4.27  |      |      |      |      |   |      |       |     |     |      |      |       |      |      |      |      |     |     |       |       |       |     | 100  | 103   |              |
| SK5    | 2        | 16    | 7        | Oz + Cal     | 16.54 |      |       | 0.56  |       |      | 82.90 |      |      |      |      |   |      |       |     |     |      |      |       |      |      |      |      |     |     |       |       |       |     | 100  | 58    |              |
| SK5    | 2        | 16    | 8        | Oz + Cal     | 51.09 |      |       |       |       |      | 48.91 |      |      |      |      |   |      |       |     |     |      |      |       |      |      |      |      |     |     |       |       |       |     | 100  | 77    |              |
| SK5    | 2        | 20    | 2        | Oz + Cal     | 97.91 |      |       |       |       |      | 2.09  |      |      |      |      |   |      |       |     |     |      |      |       |      |      |      |      |     |     |       |       |       |     | 100  | 113   |              |
| SK5    | 2        | 22    | 9        | Oz + Cal     | 66.89 |      |       |       |       | 0.52 | 32.59 |      |      |      |      |   |      |       |     |     |      |      |       |      |      |      |      |     |     |       |       |       |     | 100  | 89    |              |
| SK5    | 2        | 22    | 15       | Oz + Cal     | 69.81 |      |       |       |       |      | 29.94 |      | 0.25 |      |      |   |      |       |     |     |      |      |       |      |      |      |      |     |     |       |       |       |     | 100  | 94    |              |
| SK5    | 2        | 22    | 16       | Oz + Cal     | 90.89 |      |       | 0.77  |       | 1.48 | 3.87  | 0.45 |      |      |      |   |      |       |     |     |      | 0.73 |       |      |      |      |      |     |     |       |       |       | 100 | 77   |       |              |
| SK5    | 2        | 22    | 19       | Oz + Cal     | 97.52 |      |       |       |       |      | 2.48  |      |      |      |      |   |      |       |     |     |      |      |       |      |      |      |      |     |     |       |       |       |     | 100  | 118   |              |
| SK5    | 2        | 22    | 24       | Oz + Cal     | 72.12 |      |       |       |       |      | 27.88 |      |      |      |      |   |      |       |     |     |      |      | 1.51  |      |      |      |      |     |     |       |       |       |     | 100  | 87    |              |
| AX1B   | 1        | 7-3.5 | 8        | Oz + Cal +   | 71.21 |      |       |       |       |      | 25.52 |      |      |      | 1.76 |   |      |       |     |     |      |      |       |      |      |      |      |     |     |       |       |       |     | 100  | 82    |              |
| SK5    | 2        | 22    | 8        | Oz + Cal +   | 77.16 |      | 3.48  | 0.83  |       | 0.48 | 17.07 |      | 0.98 |      |      |   |      |       |     |     |      |      |       |      |      |      |      |     |     |       |       |       |     | 100  | 97    |              |
| SK5    | 2        | 22    | 8        | Oz + Cal +   | 74.81 |      | 2.80  | 0.57  |       | 0.52 | 20.60 |      | 0.70 |      |      |   |      |       |     |     |      |      |       |      |      |      |      |     |     |       |       |       |     | 100  | 87    |              |
| SK5    | 2        | 22    | 20       | Oz + Cal +   | 88.62 |      | 0.72  | 0.70  |       | 1.90 | 4.38  | 0.74 |      |      | 2.17 |   |      |       |     |     |      | 0.76 |       |      |      |      |      |     |     |       |       |       |     | 100  | 94    |              |
| AX2    | 1        | 5-2   | 3        | Oz + FeOhy   | 64.39 |      |       |       |       |      | 35.16 |      |      |      |      |   |      |       |     |     |      |      |       |      |      |      |      |     |     |       |       |       |     | 100  | 141   |              |
| AX2    | 1        | 5-2   | 9        | Oz + FeOhy   | 82.29 |      |       | 17.17 |       |      |       | 0.54 |      |      |      |   |      |       |     |     |      |      |       |      |      |      |      |     |     |       |       |       |     | 100  | 151   |              |
| AX3    | 1        | 3-3   | 6        | Oz + FeOhy   | 71.74 |      |       | 27.40 |       |      |       |      |      |      |      |   |      |       |     |     | 0.63 | 0.23 |       |      |      |      |      |     |     |       |       |       |     | 100  | 118   |              |
| AX3    | 1        | 3-3   | 11       | Oz + FeOhy   | 71.42 |      |       | 28.58 |       |      |       |      |      |      |      |   |      |       |     |     |      |      |       |      |      |      |      |     |     |       |       |       |     | 100  | 108   |              |
| AX3    | 1        | 3-6   | 8        | Oz + FeOhy   | 41.15 |      |       | 56.92 | 0.65  |      | 0.68  |      |      |      |      |   |      | 0.59  |     |     |      |      |       |      |      |      |      |     |     |       |       |       |     | 100  | 107   |              |
| SK5    | 2        | 1     | 7        | Oz + FeOhy   | 77.87 |      | 1.10  | 20.16 |       | 0.63 |       |      | 0.24 |      |      |   |      |       |     |     |      |      |       |      |      |      |      |     |     |       |       |       |     | 100  | 110   |              |
| SK5    | 2        | 19    | 12       | Oz + FeOhy   | 75.08 |      |       | 1.16  | 23.26 | 0.50 |       |      |      |      |      |   |      |       |     |     |      |      |       |      |      |      |      |     |     |       |       |       |     | 100  | 82    |              |
| SK5    | 2        | 2     | 29       | Oz + FeOhy + | 83.40 |      | 1.39  | 33.80 |       | 0.91 | 0.49  |      |      |      |      |   |      |       |     |     |      |      |       |      |      |      |      |     |     |       |       |       |     | 100  | 107   |              |
| SK5    | 2        | 3     | 4        | Oz + FeOhy + | 83.44 |      |       | 16.21 |       | 0.35 |       |      |      |      |      |   |      |       |     |     |      |      |       |      |      |      |      |     |     |       |       |       |     | 100  | 95    |              |
| SK5    | 2        | 3     | 5        | Oz + FeOhy + | 66.82 |      | 4.06  | 27.44 |       | 0.73 |       |      | 0.94 |      |      |   |      |       |     |     |      |      |       |      |      |      |      |     |     |       |       |       |     | 100  | 100   |              |
| SK5    | 2        | 3     | 6        | Oz + FeOhy + | 79.1  |      |       |       |       |      |       |      |      |      |      |   |      |       |     |     |      |      |       |      |      |      |      |     |     |       |       |       |     |      |       |              |

| Sample<br>Locality | Site    | Position | Mineral    | SO2   | TO2   | Al2O3 | FeO  | MnO  | MgO   | CaO   | Na2O | K2O  | P2O5 | SO3   | F    | Cl | Cr2O3 | CoO | NO | CoO | ZnO | As2O3 | ZrO2 | Ag2O | Rb2O | MnO3 | BaO  | PbO  | Li2O3 | Ca2O3 | Ni2O3 | WO3 | PO2 | Total | Actual Total |
|--------------------|---------|----------|------------|-------|-------|-------|------|------|-------|-------|------|------|------|-------|------|----|-------|-----|----|-----|-----|-------|------|------|------|------|------|------|-------|-------|-------|-----|-----|-------|--------------|
| AX1B               | 15-4.10 | 5        | Sp +       | 21.20 |       | 2.86  | 1.74 |      | 5.12  | 7.57  |      |      |      | 33.21 | 1.05 |    |       |     |    |     |     | 27.25 |      |      |      |      |      |      |       |       |       |     | 100 | 52    |              |
| AX1B               | 15-4.10 | 7        | Sp +       | 20.93 |       | 2.46  | 1.87 |      | 5.10  | 7.03  |      |      |      | 32.03 | 1.46 |    |       |     |    |     |     | 29.14 |      |      |      |      |      |      |       |       |       |     | 100 | 44    |              |
| AX1B               | 15-4.10 | 8        | Sp +       | 29.53 |       |       |      |      | 6.44  | 9.87  |      |      |      | 43.52 |      |    |       |     |    |     |     | 10.64 |      |      |      |      |      |      |       |       |       |     | 100 | 12    |              |
| AX1B               | 15-4.10 | 9        | Sp +       | 18.02 |       | 1.63  | 1.17 |      | 4.85  | 9.04  |      |      |      | 34.83 | 0.78 |    |       |     |    |     |     | 29.83 | 0.03 |      |      |      |      |      |       |       |       |     | 100 | 87    |              |
| AX1B               | 15-7    | 2        | Sp +       | 22.99 | 0.50  | 2.48  | 1.92 |      | 4.38  | 7.62  |      |      |      | 32.62 | 0.75 |    |       |     |    |     |     | 27.13 |      |      |      |      |      |      |       |       |       |     | 100 | 90    |              |
| AX1B               | 15-7    | 3        | Sp +       | 24.92 |       | 3.06  | 1.92 |      | 3.90  | 7.72  |      |      |      | 35.25 | 0.99 |    | 1.92  |     |    |     |     | 22.23 |      |      |      |      |      |      |       |       |       |     | 100 | 35    |              |
| AX1B               | 15-7    | 4        | Sp +       | 21.97 | 0.51  | 2.27  | 1.82 |      | 4.27  | 7.85  |      |      |      | 31.92 | 0.75 |    | 1.14  |     |    |     |     | 28.65 |      |      |      |      |      |      |       |       |       |     | 100 | 83    |              |
| AX1B               | 15-7    | 6        | Sp +       | 30.47 |       | 2.08  | 1.46 |      | 4.78  | 8.11  |      |      |      | 28.23 | 0.83 |    |       |     |    |     |     | 24.15 |      |      |      |      |      |      |       |       |       |     | 100 | 77    |              |
| AX1B               | 15-7    | 7        | Sp +       | 23.79 | 0.59  | 2.08  | 1.45 |      | 4.20  | 5.71  |      |      |      | 33.58 | 0.82 |    |       |     |    |     |     | 27.55 | 0.23 |      |      |      |      |      |       |       |       |     | 100 | 64    |              |
| AX1B               | 15-7    | 8        | Sp +       | 22.60 |       | 2.61  |      |      | 6.74  | 21.51 |      |      |      | 32.62 |      |    |       |     |    |     |     | 13.91 |      |      |      |      |      |      |       |       |       |     | 100 | 16    |              |
| AX1B               | 16-7    | 2        | Sp +       | 23.22 |       | 2.95  | 2.08 |      | 4.26  | 9.54  |      | 0.35 |      | 28.16 | 0.83 |    |       |     |    |     |     | 23.85 |      |      |      |      | 4.74 |      |       |       |       |     | 100 | 79    |              |
| AX1B               | 16-7    | 3        | Sp +       | 32.22 |       | 3.83  | 2.18 |      | 5.51  | 7.82  |      |      |      | 29.51 | 0.91 |    |       |     |    |     |     | 18.02 |      |      |      |      |      |      |       |       |       |     | 100 | 24    |              |
| AX1B               | 16-7    | 4        | Sp +       | 25.78 |       |       | 1.77 |      | 7.16  | 10.17 |      |      |      | 30.10 |      |    |       |     |    |     |     | 25.01 |      |      |      |      |      |      |       |       |       |     | 100 | 17    |              |
| AX1B               | 16-7    | 5        | Sp +       | 27.30 |       | 3.55  | 2.91 |      | 5.31  | 9.19  |      |      |      | 27.04 | 0.81 |    |       |     |    |     |     | 23.56 | 0.31 |      |      |      |      |      |       |       |       |     | 100 | 58    |              |
| AX1B               | 16-7    | 6        | Sp +       | 33.73 | 0.46  | 2.41  | 1.61 |      | 3.29  | 6.47  |      | 0.34 |      | 26.63 | 0.59 |    |       |     |    |     |     | 24.39 | 0.07 |      |      |      |      |      |       |       |       |     | 100 | 108   |              |
| AX1B               | 16-8    | 2        | Sp +       | 18.15 |       | 2.02  | 1.36 |      | 4.46  | 6.97  |      |      |      | 34.43 | 0.71 |    |       |     |    |     |     | 31.71 | 0.19 |      |      |      |      |      |       |       |       |     | 100 | 79    |              |
| AX1B               | 16-8    | 3        | Sp +       | 26.77 |       | 4.77  | 1.76 |      | 7.84  | 9.98  |      |      |      | 31.21 |      |    |       |     |    |     |     | 17.66 |      |      |      |      |      |      |       |       |       |     | 100 | 18    |              |
| AX1B               | 16-8    | 4        | Sp +       | 23.22 |       | 4.19  | 2.33 |      | 6.34  | 9.30  |      |      |      | 31.13 | 1.24 |    |       |     |    |     |     | 22.24 |      |      |      |      |      |      |       |       |       |     | 100 | 27    |              |
| AX1B               | 16-8    | 5        | Sp +       | 21.56 |       | 1.89  | 1.73 |      | 5.52  | 7.25  |      |      |      | 31.38 | 0.67 |    |       |     |    |     |     | 28.66 | 0.34 |      |      |      |      |      |       |       |       |     | 100 | 70    |              |
| AX1B               | 16-8    | 6        | Sp +       | 26.20 |       | 2.80  | 1.88 |      | 4.61  | 7.40  |      | 0.45 |      | 29.82 | 0.56 |    |       |     |    |     |     | 26.20 | 0.09 |      |      |      |      |      |       |       |       |     | 100 | 43    |              |
| AX1B               | 16-8    | 7        | Sp +       | 14.95 |       | 1.84  | 1.44 |      | 4.74  | 6.59  |      |      |      | 37.38 | 0.64 |    |       |     |    |     |     | 32.49 |      |      |      |      |      |      |       |       |       |     | 100 | 47    |              |
| AX1B               | 16-8    | 8        | Sp +       | 14.74 |       | 1.53  | 1.33 |      | 8.99  | 13.41 |      |      |      | 35.75 |      |    |       |     |    |     |     | 24.25 |      |      |      |      |      |      |       |       |       |     | 100 | 31    |              |
| AX1B               | 17-4.6  | 2        | Sp +       | 25.12 |       | 2.29  | 1.64 |      | 3.70  | 7.80  |      | 0.38 |      | 31.63 |      |    |       |     |    |     |     | 26.34 | 0.05 |      |      |      | 1.05 |      |       |       |       |     | 100 | 97    |              |
| AX1B               | 17-3.5  | 3        | Sp +       | 24.29 |       | 3.53  | 1.98 |      | 4.97  | 7.68  |      |      |      | 31.17 | 0.94 |    |       |     |    |     |     | 25.57 |      |      |      |      |      |      |       |       |       |     | 100 | 64    |              |
| AX1B               | 17-3.5  | 4        | Sp +       | 28.55 |       | 3.08  | 2.08 |      | 3.92  | 7.93  |      | 0.37 |      | 28.63 | 0.94 |    |       |     |    |     |     | 24.58 |      |      |      |      |      |      |       |       |       |     | 100 | 65    |              |
| AX1B               | 17-3.5  | 9        | Sp +       | 24.49 |       | 2.21  | 1.75 |      | 7.14  | 9.90  |      |      |      | 29.15 | 0.71 |    |       |     |    |     |     | 24.66 |      |      |      |      |      |      |       |       |       |     | 100 | 48    |              |
| AX1B               | 17-3.5  | 10       | Sp +       | 24.24 |       | 2.01  | 1.70 |      | 4.64  | 7.79  |      |      |      | 28.14 | 0.57 |    |       |     |    |     |     | 23.58 |      |      |      |      | 7.33 |      |       |       |       |     | 100 | 64    |              |
| AX1B               | 17-3.5  | 21       | Sp +       | 25.86 |       | 3.04  | 2.24 |      | 4.26  | 9.34  |      | 0.38 |      | 29.53 | 0.51 |    |       |     |    |     |     | 24.91 |      |      |      |      |      |      |       |       |       |     | 100 | 76    |              |
| AX1B               | 17-3.5  | 22       | Sp +       | 32.75 |       | 3.99  | 3.48 |      | 3.96  | 10.45 |      | 0.44 |      | 24.88 | 0.57 |    |       |     |    |     |     | 19.48 |      |      |      |      |      |      |       |       |       |     | 100 | 65    |              |
| AX1B               | 18-4.5  | 3        | Sp +       | 20.30 |       | 2.49  | 1.86 |      | 5.56  | 8.06  |      | 0.34 |      | 31.43 | 0.57 |    |       |     |    |     |     | 21.55 |      |      |      |      | 7.86 |      |       |       |       |     | 100 | 74    |              |
| AX1B               | 18-4.5  | 4        | Sp +       | 24.20 |       | 2.53  | 1.80 |      | 7.03  | 9.08  |      |      |      | 30.60 | 0.61 |    |       |     |    |     |     | 22.69 |      |      |      |      | 1.46 |      |       |       |       |     | 100 | 57    |              |
| AX1B               | 19-5    | 2        | Sp +       | 27.55 |       | 3.55  | 2.88 |      | 4.60  | 9.49  |      |      |      | 28.22 | 0.62 |    |       |     |    |     |     | 23.21 |      |      |      |      |      |      |       |       |       |     | 100 | 63    |              |
| AX1B               | 19-5    | 3        | Sp +       | 25.45 | 0.56  | 3.36  | 2.54 |      | 5.16  | 9.30  |      | 0.43 |      | 28.89 | 0.57 |    |       |     |    |     |     | 23.76 |      |      |      |      |      |      |       |       |       |     | 100 | 72    |              |
| AX1B               | 111-6   | 1        | Sp +       | 21.43 |       | 2.60  | 1.71 |      | 3.77  | 6.65  |      | 0.44 |      | 31.44 | 0.52 |    |       |     |    |     |     | 26.12 |      |      |      |      | 0.80 | 4.52 |       |       |       |     | 100 | 96    |              |
| AX1B               | 19-3.4  | 5        | Sp + Ap +  | 33.78 |       | 2.27  | 1.13 |      | 3.01  | 7.29  |      |      | 4.31 | 27.62 | 0.75 |    |       |     |    |     |     | 19.84 |      |      |      |      |      |      |       |       |       |     | 100 | 31    |              |
| AX1B               | 17-4.6  | 3        | Sp + Cal + | 16.97 |       | 2.02  | 1.48 |      | 3.20  | 33.43 |      | 0.33 |      | 22.09 | 0.35 |    |       |     |    |     |     | 20.14 |      |      |      |      |      |      |       |       |       |     | 100 | 80    |              |
| AX1B               | 17-4.6  | 4        | Sp + Cal + | 40.98 |       | 2.92  | 2.33 |      | 3.82  | 10.82 |      | 0.46 |      | 20.83 | 0.39 |    |       |     |    |     |     | 17.16 | 0.28 |      |      |      |      |      |       |       |       |     | 100 | 73    |              |
| AX1B               | 17-3.5  | 23       | Sp + Cal + | 46.42 |       | 1.47  | 4.48 | 0.63 | 28.46 |       |      |      |      | 7.26  | 0.34 |    |       |     |    |     |     | 6.83  |      |      |      |      | 2.18 |      |       |       |       |     | 100 | 74    |              |
| AX1B               | 15-7    | 5        | Sp + Qz +  | 62.30 | 0.45  | 1.87  | 2.79 |      | 0.57  | 1.26  |      | 0.27 |      | 14.27 | 0.24 |    |       |     |    |     |     | 15.97 |      |      |      |      |      |      |       |       |       |     | 100 | 111   |              |
| AX1B               | 16-7    | 7        | Sp + Qz +  | 63.69 | 0.41  | 1.58  | 1.69 |      | 1.26  | 1.93  |      | 0.23 |      | 14.33 | 0.27 |    |       |     |    |     |     | 14.61 | 0.00 |      |      |      |      |      |       |       |       |     | 100 | 110   |              |
| AX1B               | 17-4.6  | 7        | Sp + Qz +  | 44.51 |       | 2.27  | 1.94 |      | 3.65  | 8.76  |      |      |      | 22.05 |      |    |       |     |    |     |     | 16.82 |      |      |      |      |      |      |       |       |       |     | 100 | 58    |              |
| AX1B               | 17-4.6  | 9        | Sp + Qz +  | 40.67 |       | 1.26  | 1.17 |      | 4.25  | 8.25  |      |      |      | 24.72 | 0.32 |    |       |     |    |     |     | 19.60 |      |      |      |      |      |      |       |       |       |     | 100 | 78    |              |
| AX1B               | 17-4.6  | 12       | Sp + Qz +  | 38.35 |       | 3.62  | 2.29 | 0.47 | 3.13  | 6.36  |      | 0.44 |      | 23.84 | 0.63 |    |       |     |    |     |     | 19.04 |      |      |      |      | 1.84 |      |       |       |       |     | 100 | 91    |              |
| AX1B               | 17-4.6  | 13       | Sp + Qz +  | 72.83 |       | 0.69  | 0.56 |      | 1.01  | 2.41  |      |      |      | 11.47 | 0.26 |    |       |     |    |     |     | 10.76 |      |      |      |      |      |      |       |       |       |     | 100 | 108   |              |
| AX1B               | 17-4.6  | 14       | Sp + Qz +  | 65.73 |       | 0.80  | 0.53 |      | 1.79  | 2.78  |      |      |      | 14.70 | 0.38 |    |       |     |    |     |     | 13.13 | 0.15 |      |      |      |      |      |       |       |       |     | 100 | 107   |              |
| AX1B               | 17-4.6  | 15       | Sp + Qz +  | 43.32 |       | 1.63  | 0.86 |      | 3.36  | 6.97  |      |      |      | 22.85 | 0.42 |    |       |     |    |     |     | 20.58 | 0.00 |      |      |      |      |      |       |       |       |     | 100 | 64    |              |
| AX1B               | 17-4.6  | 17       | Sp + Qz +  | 56.47 |       | 0.85  | 0.83 |      | 2.01  | 3.61  |      |      |      | 18.38 | 0.41 |    |       |     |    |     |     | 17.08 | 0.36 |      |      |      |      |      |       |       |       |     | 100 | 69    |              |
| AX1B               | 17-4.6  | 18       | Sp + Qz +  | 63.42 |       |       | 1.54 |      | 1.60  | 2.31  |      |      |      | 16.02 | 0.43 |    |       |     |    |     |     | 14.68 |      |      |      |      |      |      |       |       |       |     | 100 | 88    |              |
| AX1B               | 17-3.5  | 14       | Sp + Qz +  | 43.09 |       | 1.67  | 1.89 |      | 3.35  | 7.19  |      |      |      | 23.59 | 0.44 |    |       |     |    |     |     | 18.77 |      |      |      |      |      |      |       |       |       |     | 100 | 70    |              |
| AX1B               | 17-3.5  | 15       | Sp + Qz +  | 95.41 |       |       |      |      |       |       |      |      |      | 2.01  | 0.66 |    |       |     |    |     |     | 1.92  |      |      |      |      |      |      |       |       |       |     | 100 | 85    |              |
| AX1B               | 17-3.5  | 16       | Sp + Qz +  | 62.88 |       | 0.80  | 0.67 |      | 2.16  | 3.12  |      |      |      | 15.82 | 0.36 |    |       |     |    |     |     | 14.18 |      |      |      |      |      |      |       |       |       |     | 100 | 90    |              |
| AX1B               | 17-3.5  | 18       | Sp + Qz +  | 59.27 |       | 1.02  | 0.86 |      | 1.85  | 3.18  |      |      |      | 17.77 | 0.28 |    |       |     |    |     |     | 15.87 |      |      |      |      |      |      |       |       |       |     | 100 | 104   |              |
| AX1B               | 17-3.5  | 24       | Sp + Qz +  | 59.76 |       | 1.02  | 5.74 | 2.39 | 1.27  | 2.41  |      |      |      | 12.84 | 0.27 |    |       |     |    |     |     | 11.32 |      |      |      |      | 1.87 |      |       |       |       |     | 100 | 85    |              |
| AX1B               | 17-3.5  | 26       | Sp + Qz +  | 72.36 |       |       | 0.96 | 0.82 | 0.56  | 1.40  |      |      |      | 11.21 | 0.36 |    |       |     |    |     |     | 4.72  |      |      |      |      | 7.61 |      |       |       |       |     | 100 | 72    |              |
| AX1B               | 19-5    | 4        | Sp + Qz +  | 74.62 |       | 1.87  | 1.54 |      | 2.06  | 4.14  |      |      |      | 7.90  | 0.34 |    |       |     |    |     |     | 7.52  |      |      |      |      |      |      |       |       |       |     | 100 | 99    |              |
| AX3                | 13-3    | 10       | TiO2 + Qz  | 47.27 | 52.73 |       |      |      |       |       |      |      |      |       |      |    |       |     |    |     |     |       |      |      |      |      |      |      |       |       |       |     | 100 | 126   |              |
| SK5                | 2-1     | 6        | TiO2 + Qz  | 24.67 | 73.76 |       | 1.57 |      |       |       |      |      |      |       |      |    |       |     |    |     |     |       |      |      |      |      |      |      |       |       |       |     |     |       |              |

Supplementary Material S11: SEM-BSE images and Electron Dispersive Spectroscopy (EDS) mineral analyses for sample ARK2.

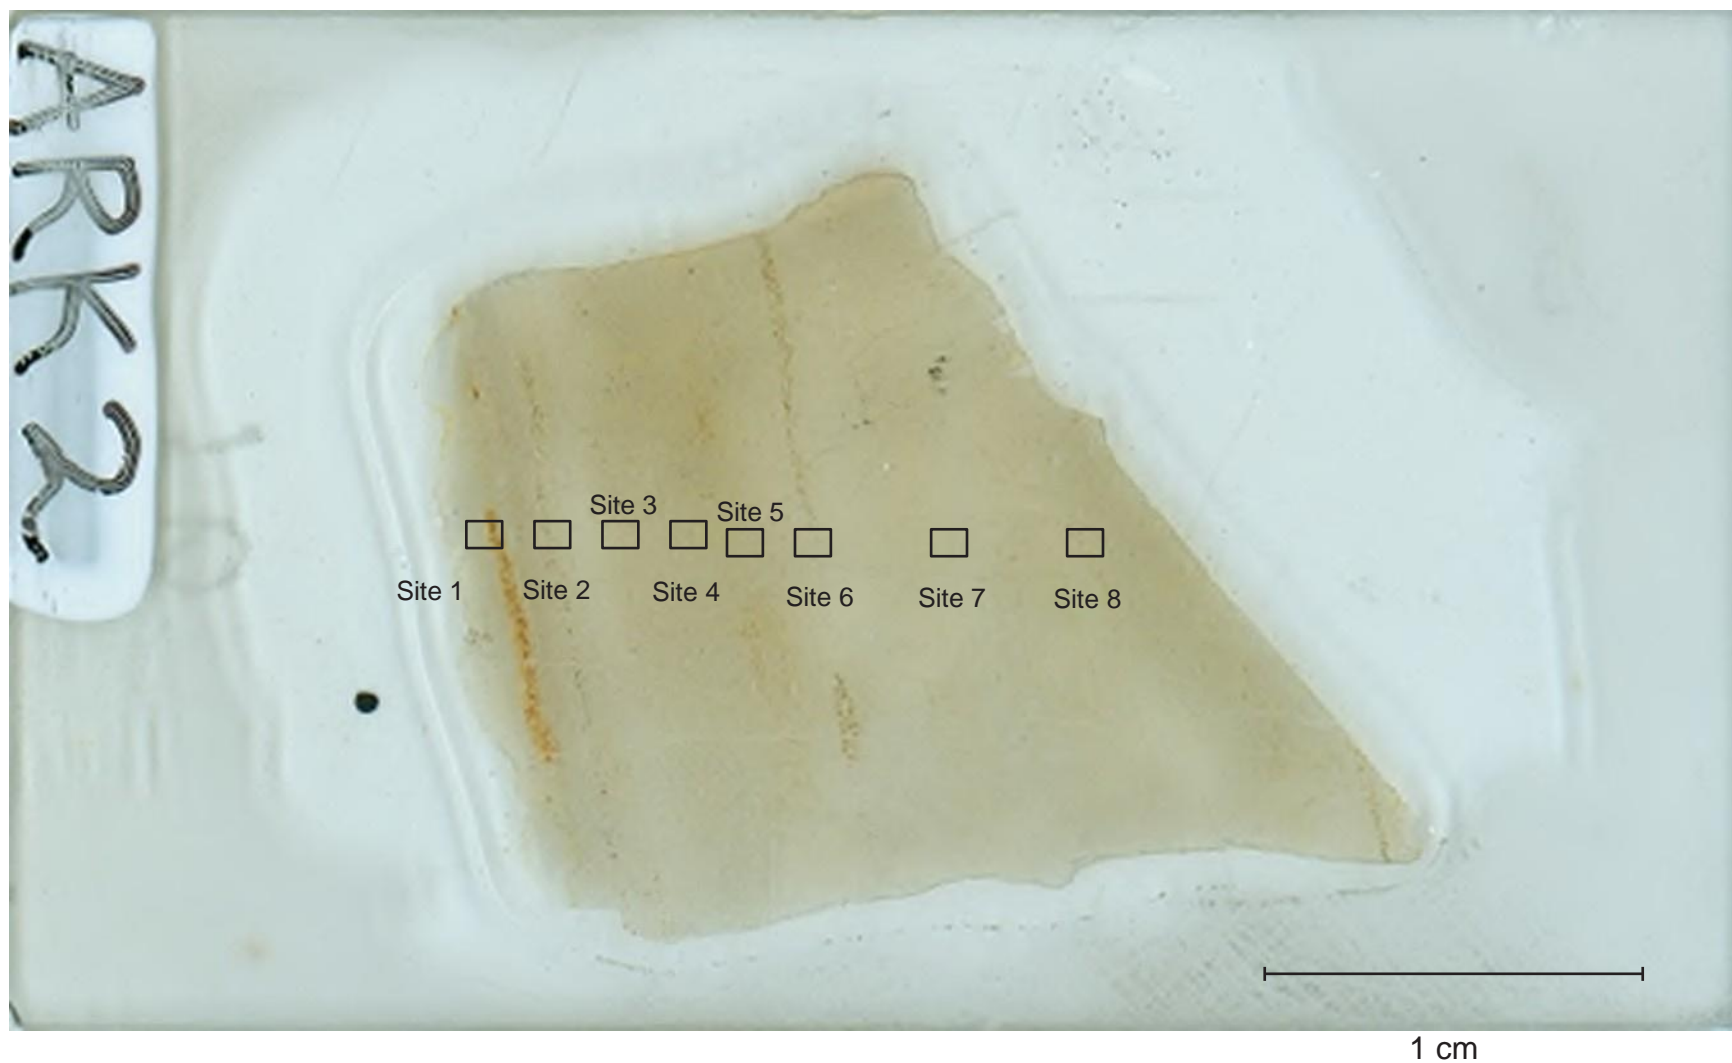

Figure S11.1: ARK2 thin section showing respective sites taken for mineral chemical analyses (EDS) via Scanning Electron Microscope (SEM).

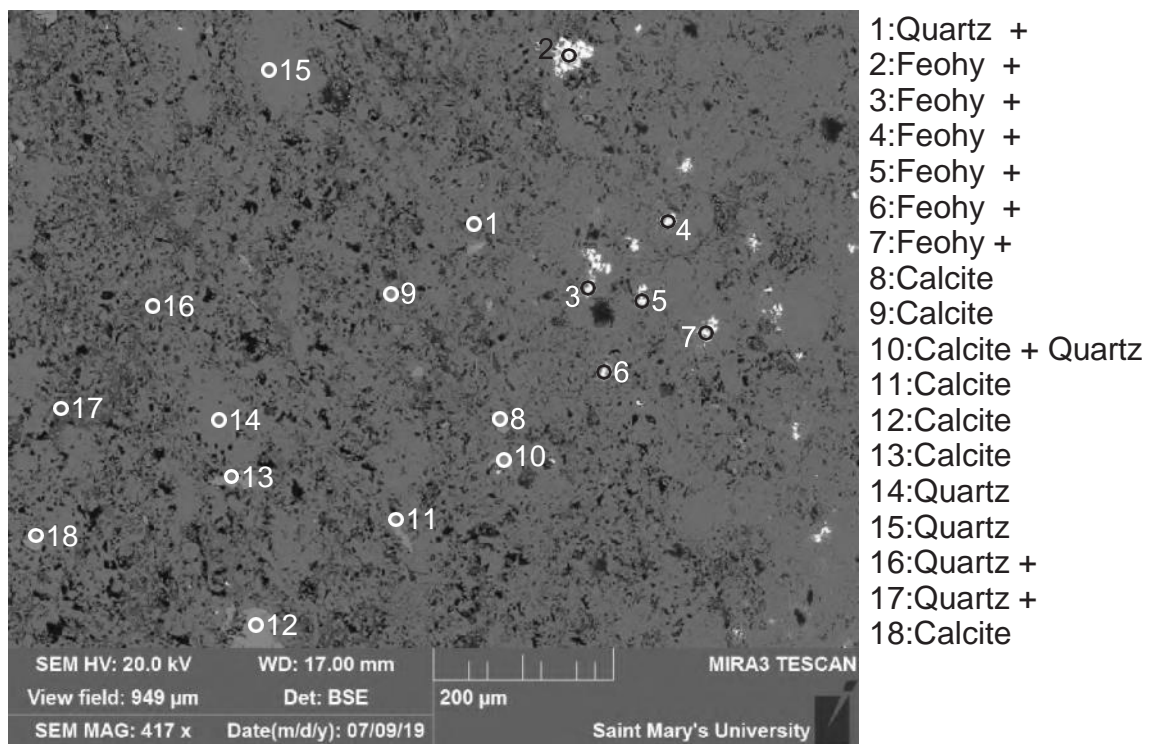

Figure S11.2: ARK2 (SEM) Site 1 (Table S11.1).

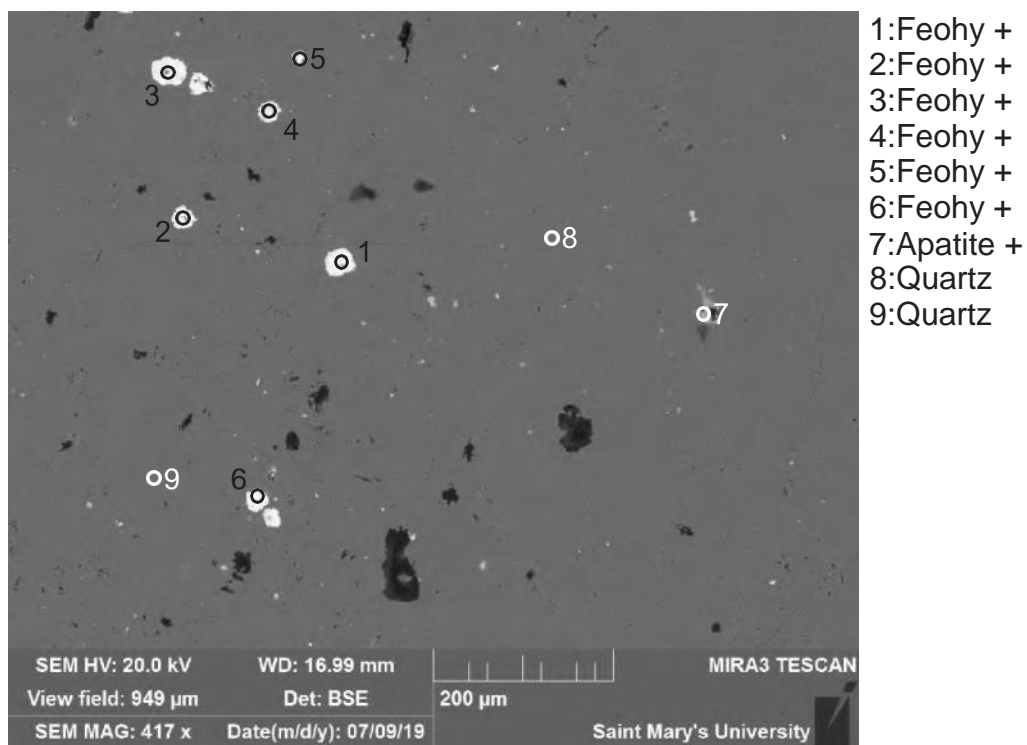

Figure S11.3: ARK2 (SEM) Site 2 (Table S11.1).



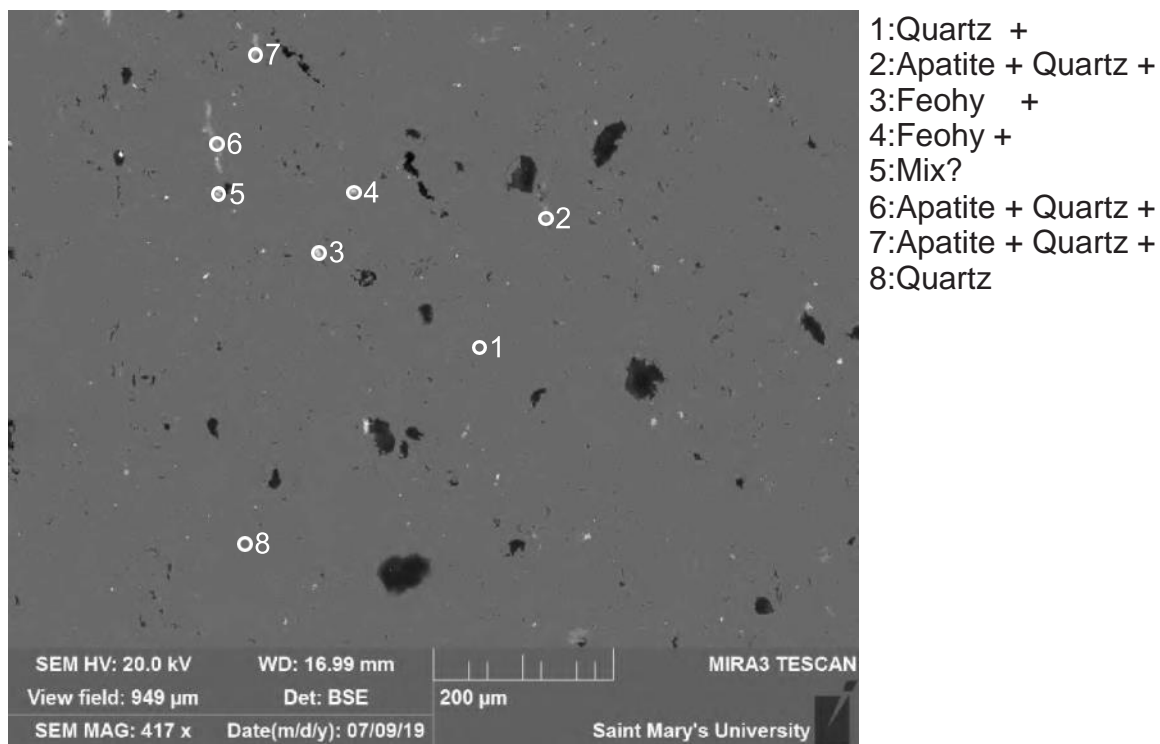

Figure S11.4: ARK2 (SEM) Site 3 (Table S11.1).

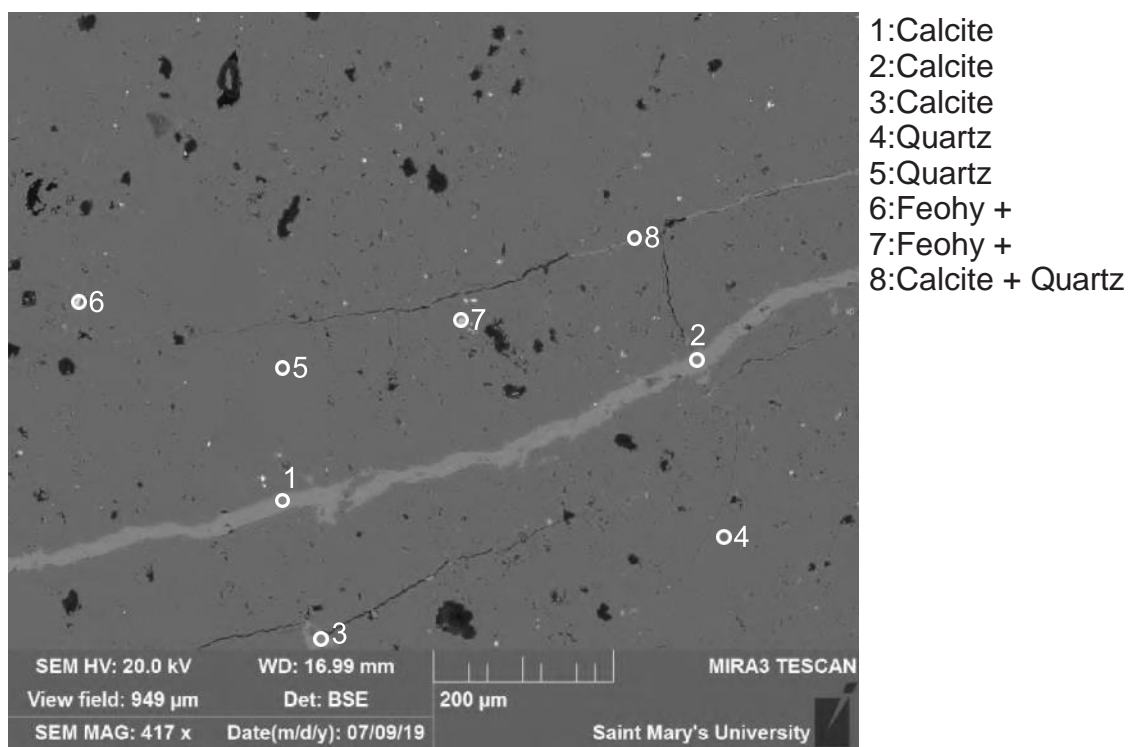

Figure S11.5: ARK2 (SEM) Site 4 (Table S11.1).

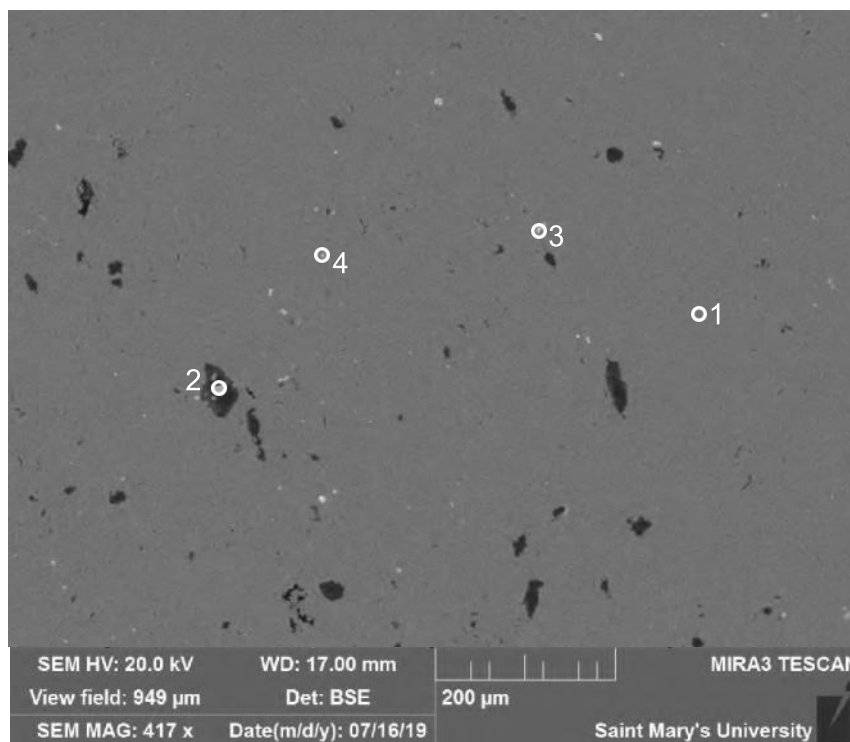

- 1:Quartz +
- 2:Apatite
- 3:Feohy +
- 4:Quartz +

Figure S11.6: ARK2 (SEM) Site 5 (Table S11.1).

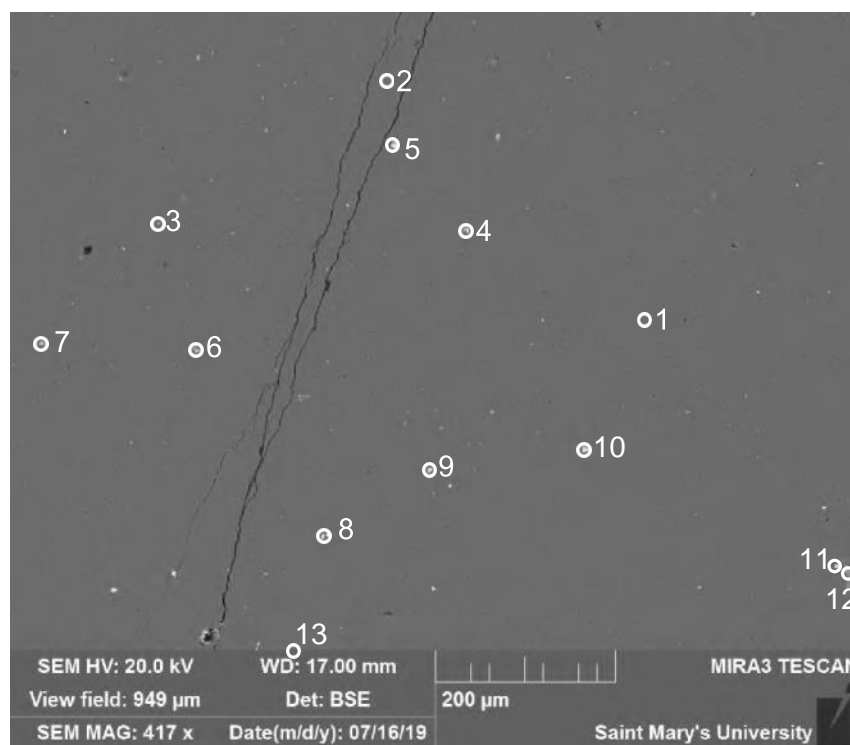

- 1:Quartz
- 2:Quartz +
- 3:Quartz
- 4:Feohy +
- 5:Feohy +
- 6:Feohy +
- 7:Feohy +
- 8:Feohy +
- 9:Feohy +
- 10:Feohy +
- 11:Feohy +
- 12:Apatite + Quartz +
- 13:Feohy +

Figure S11.7: ARK2 (SEM) Site 6 (Table S11.1).

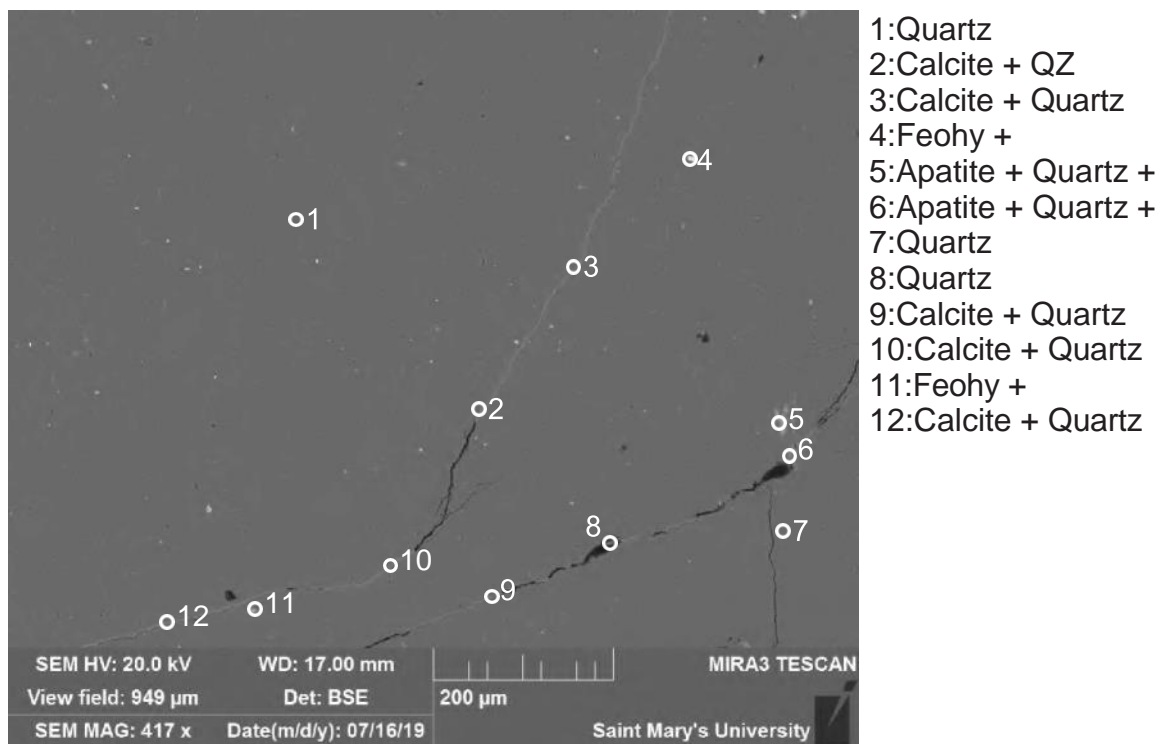

Figure S11.8: ARK2 (SEM) Site 7 (Table S11.1).

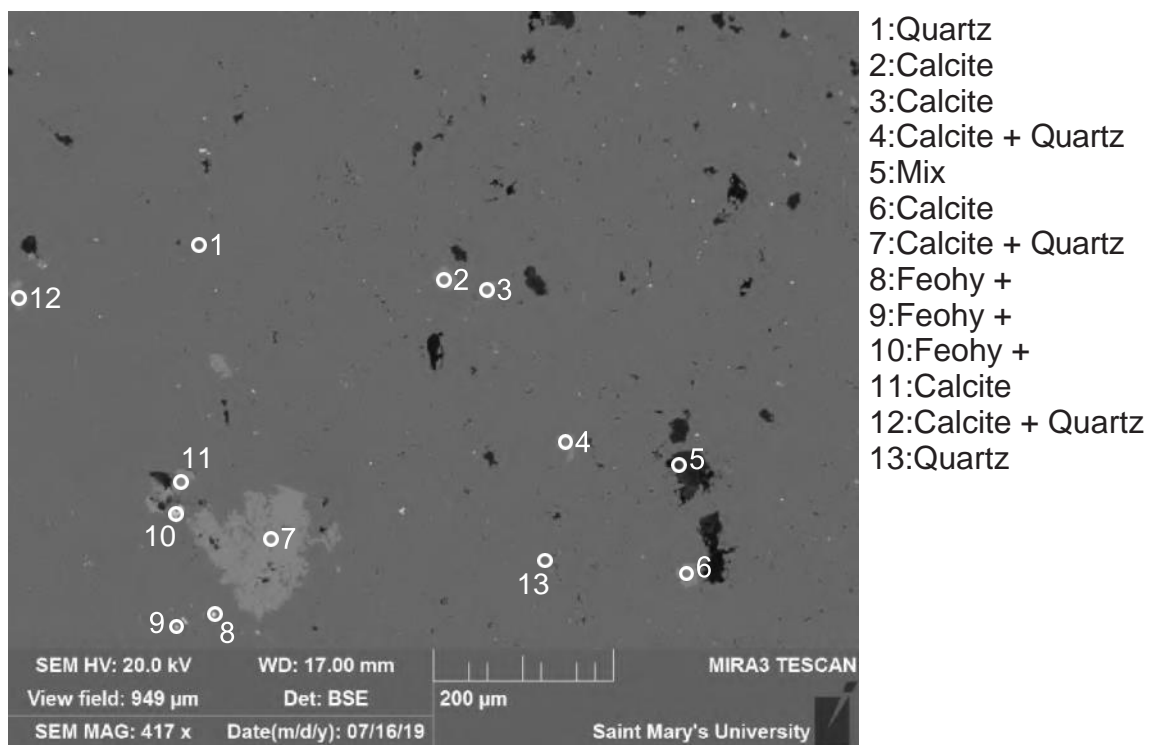

Figure S11.9: ARK2 (SEM) Site 8 (Table S11.1).

Table S11.1: Scanning Electron Microscope (SEM) mineral chemical analyses (EDS) of ARK2.

| Site | Position | Mineral   | SiO2   | TiO2 | Al2O3 | FeO   | MnO  | MgO  | CaO   | Na2O | K2O  | P2O5  | SO3  | F    | Cl   | NiO | CuO  | ZnO  | WO3  | Total | Actual Total |
|------|----------|-----------|--------|------|-------|-------|------|------|-------|------|------|-------|------|------|------|-----|------|------|------|-------|--------------|
| 1    | 1        | Qz +      | 98.60  |      | 0.93  |       |      |      |       | 0.28 | 0.18 |       |      |      |      |     |      |      |      | 100   | 120          |
| 1    | 2        | Feohy +   | 5.69   |      | 1.54  | 88.64 | 1.25 | 1.41 | 0.82  |      |      |       |      |      | 0.66 |     |      |      |      | 100   | 86           |
| 1    | 3        | Feohy +   | 6.20   |      | 1.57  | 88.91 | 0.75 | 1.17 | 0.90  |      |      |       |      |      | 0.51 |     |      |      |      | 100   | 87           |
| 1    | 4        | Feohy +   | 8.96   |      | 1.48  | 86.09 | 0.47 | 1.73 | 0.77  |      |      |       |      |      | 0.51 |     |      |      |      | 100   | 86           |
| 1    | 5        | Feohy +   | 7.95   |      | 1.39  | 87.41 |      | 1.74 | 0.81  |      |      |       |      |      | 0.71 |     |      |      |      | 100   | 83           |
| 1    | 6        | Feohy +   | 7.30   |      | 1.71  | 87.17 | 0.93 | 1.40 | 0.91  |      |      |       |      |      | 0.58 |     |      |      |      | 100   | 85           |
| 1    | 7        | Feohy +   | 13.40  |      | 2.08  | 80.36 |      | 1.81 | 0.96  |      |      |       |      |      | 1.09 |     |      | 0.29 |      | 100   | 82           |
| 1    | 8        | Cal       | 0.91   |      |       |       |      | 0.84 | 54.25 |      |      |       |      |      |      |     |      |      |      | 56    | 61           |
| 1    | 9        | Cal       | 0.86   |      |       |       |      | 0.90 | 54.24 |      |      |       |      |      |      |     |      |      |      | 56    | 60           |
| 1    | 10       | Cal + Qz  | 12.96  |      |       |       |      | 1.91 | 85.13 |      |      |       |      |      |      |     |      |      |      | 100   | 62           |
| 1    | 11       | Cal       | 1.28   |      |       |       |      | 0.88 | 53.83 |      |      |       |      |      |      |     |      |      |      | 56    | 61           |
| 1    | 12       | Cal       | 0.59   |      |       |       |      | 1.01 | 54.39 |      |      |       |      |      |      |     |      |      |      | 56    | 60           |
| 1    | 13       | Cal       | 0.90   |      |       |       |      | 0.96 | 54.14 |      |      |       |      |      |      |     |      |      |      | 56    | 60           |
| 1    | 14       | Qz        | 100.00 |      |       |       |      |      |       |      |      |       |      |      |      |     |      |      |      | 100   | 120          |
| 1    | 15       | Qz        | 100.00 |      |       |       |      |      |       |      |      |       |      |      |      |     |      |      |      | 100   | 118          |
| 1    | 16       | Qz +      | 92.65  |      | 3.63  | 0.94  |      | 1.00 | 0.36  |      | 1.15 |       |      |      | 0.27 |     |      |      |      | 100   | 101          |
| 1    | 17       | Qz +      | 92.24  |      | 2.38  | 1.22  |      | 0.76 | 1.40  |      | 0.65 | 0.90  |      |      | 0.44 |     |      |      |      | 100   | 89           |
| 1    | 18       | Cal       | 0.88   |      |       |       |      | 1.00 | 54.12 |      |      |       |      |      |      |     |      |      |      | 56    | 58           |
| 2    | 1        | Feohy +   | 6.46   |      | 0.98  | 90.50 |      | 0.91 | 0.52  |      |      |       |      |      | 0.63 |     |      |      |      | 100   | 81           |
| 2    | 2        | Feohy +   | 17.25  |      |       | 79.64 | 1.02 | 1.19 | 0.45  |      |      |       |      |      | 0.46 |     |      |      |      | 100   | 85           |
| 2    | 3        | Feohy +   | 24.45  |      | 1.49  | 71.97 |      | 1.36 |       |      |      |       |      |      | 0.73 |     |      |      |      | 100   | 85           |
| 2    | 4        | Feohy +   | 8.40   |      | 1.65  | 86.47 | 0.62 | 1.51 | 0.58  |      |      |       |      |      | 0.76 |     |      |      |      | 100   | 79           |
| 2    | 5        | Feohy +   | 5.85   |      |       | 90.68 | 0.68 | 0.90 | 0.50  |      |      |       |      |      | 0.46 |     | 0.94 |      |      | 100   | 78           |
| 2    | 6        | Feohy +   | 10.83  |      |       | 85.83 | 1.49 | 0.79 | 0.50  |      |      |       |      |      | 0.57 |     |      |      |      | 100   | 83           |
| 2    | 7        | Ap +      | 1.17   |      |       |       |      | 0.82 | 47.55 | 1.29 |      | 38.42 | 2.44 | 5.64 | 1.28 |     |      |      | 1.39 | 100   | 114          |
| 2    | 8        | Qz        | 99.22  |      | 0.78  |       |      |      |       |      |      |       |      |      |      |     |      |      |      | 100   | 119          |
| 2    | 9        | Qz        | 99.47  |      | 0.53  |       |      |      |       |      |      |       |      |      |      |     |      |      |      | 100   | 117          |
| 3    | 1        | Qz +      | 98.15  |      | 1.41  |       |      |      |       |      | 0.44 |       |      |      |      |     |      |      |      | 100   | 118          |
| 3    | 2        | Ap + Qz + | 25.55  |      |       |       |      | 0.57 | 37.40 | 0.81 |      | 28.51 | 1.99 | 4.52 | 0.67 |     |      |      |      | 100   | 107          |
| 3    | 3        | Feohy +   | 27.93  |      | 3.57  | 65.33 |      | 1.60 | 0.66  |      |      |       |      |      | 0.91 |     |      |      |      | 100   | 86           |
| 3    | 4        | Feohy +   | 24.60  |      | 4.09  | 67.35 |      | 1.91 | 0.82  |      |      |       |      |      | 1.23 |     |      |      |      | 100   | 81           |
| 3    | 5        | Mix?      | 81.15  |      | 1.16  | 16.59 |      | 0.42 | 0.37  |      |      |       |      |      | 0.32 |     |      |      |      | 100   | 98           |
| 3    | 6        | Ap + Qz + | 21.53  |      |       |       |      | 0.51 | 36.80 | 0.76 |      | 32.53 | 1.33 | 5.50 | 1.06 |     |      |      |      | 100   | 111          |
| 3    | 7        | Ap + Qz + | 1.25   |      |       |       |      | 0.75 | 46.97 | 1.18 |      | 38.93 | 2.24 | 6.11 | 1.26 |     |      |      | 1.31 | 100   | 108          |
| 3    | 8        | Qz        | 99.24  |      | 0.56  |       |      |      |       |      | 0.20 |       |      |      |      |     |      |      |      | 100   | 118          |
| 4    | 1        | Cal       | 1.00   |      |       |       |      | 0.65 | 54.35 |      |      |       |      |      |      |     |      |      |      | 56    | 57           |
| 4    | 2        | Cal       | 0.83   |      |       |       |      | 0.83 | 54.34 |      |      |       |      |      |      |     |      |      |      | 56    | 59           |
| 4    | 3        | Cal       | 0.95   |      |       |       |      | 1.00 | 54.05 |      |      |       |      |      |      |     |      |      |      | 56    | 58           |
| 4    | 4        | Qz        | 99.80  |      |       |       |      |      |       |      |      |       |      |      | 0.20 |     |      |      |      | 100   | 121          |

Table S11.1: Scanning Electron Microscope (SEM) mineral chemical analyses (EDS) of ARK2.

| Site | Position | Mineral   | SiO2   | TiO2 | Al2O3 | FeO   | MnO  | MgO  | CaO   | Na2O | K2O  | P2O5  | SO3  | F    | Cl   | NiO  | CuO  | ZnO | WO3  | Total | Actual Total |
|------|----------|-----------|--------|------|-------|-------|------|------|-------|------|------|-------|------|------|------|------|------|-----|------|-------|--------------|
| 4    | 5        | Qz        | 100.00 |      |       |       |      |      |       |      |      |       |      |      |      |      |      |     |      | 100   | 116          |
| 4    | 6        | Feohy +   | 14.40  |      | 4.40  | 76.83 |      | 2.25 | 0.80  |      |      |       |      |      | 1.31 |      |      |     |      | 100   | 77           |
| 4    | 7        | Feohy +   | 42.12  |      | 3.85  | 50.24 |      | 1.80 | 0.89  |      |      |       |      |      | 1.10 |      |      |     |      | 100   | 87           |
| 4    | 8        | Cal + Qz  | 34.30  |      |       | 0.68  |      | 1.25 | 63.78 |      |      |       |      |      |      |      |      |     |      | 100   | 71           |
| 5    | 1        | Qz +      | 97.87  |      | 1.42  | 0.27  |      |      |       |      | 0.45 |       |      |      |      |      |      |     |      | 100   | 116          |
| 5    | 2        | Ap        | 0.95   |      |       |       |      |      | 46.28 |      |      | 43.76 |      | 7.61 |      |      |      |     | 1.41 | 100   | 121          |
| 5    | 3        | Feohy +   | 16.00  |      | 1.25  | 78.94 | 0.76 | 1.42 | 0.73  |      |      |       |      |      | 0.89 |      |      |     |      | 100   | 85           |
| 5    | 4        | Qz +      | 82.90  |      | 0.64  | 16.21 |      |      |       |      |      |       |      |      | 0.25 |      |      |     |      | 100   | 94           |
| 6    | 1        | Qz        | 99.41  |      | 0.59  |       |      |      |       |      |      |       |      |      |      |      |      |     |      | 100   | 118          |
| 6    | 2        | Qz +      | 97.99  |      | 1.62  |       |      |      |       |      | 0.39 |       |      |      |      |      |      |     |      | 100   | 111          |
| 6    | 3        | Qz        | 99.41  |      | 0.59  |       |      |      |       |      |      |       |      |      |      |      |      |     |      | 100   | 112          |
| 6    | 4        | Feohy +   | 29.42  |      | 0.95  | 67.71 | 0.43 | 1.02 |       |      |      |       |      |      | 0.48 |      |      |     |      | 100   | 94           |
| 6    | 5        | Feohy +   | 17.69  |      | 1.12  | 79.51 |      |      | 0.50  |      |      |       |      |      | 0.50 |      | 0.68 |     |      | 100   | 86           |
| 6    | 6        | Feohy +   | 62.17  |      | 1.96  | 34.38 |      | 0.70 | 0.33  |      |      |       |      |      | 0.47 |      |      |     |      | 100   | 95           |
| 6    | 7        | Feohy +   | 46.29  |      | 2.59  | 47.76 |      | 1.34 | 0.42  |      |      |       |      |      | 1.05 |      | 0.55 |     |      | 100   | 90           |
| 6    | 8        | Feohy +   | 11.96  |      | 2.03  | 82.80 | 0.98 | 1.17 | 0.46  |      |      |       |      |      | 0.61 |      |      |     |      | 100   | 82           |
| 6    | 9        | Feohy +   | 22.46  |      | 1.14  | 73.05 |      | 0.75 | 0.56  |      |      |       |      |      | 0.74 | 0.55 | 0.74 |     |      | 100   | 88           |
| 6    | 10       | Feohy +   | 14.46  |      | 1.46  | 81.06 | 0.73 | 1.20 | 0.49  |      |      |       |      |      | 0.61 |      |      |     |      | 100   | 86           |
| 6    | 11       | Feohy +   | 18.48  |      | 1.44  | 76.70 | 0.52 | 1.37 | 0.70  |      |      |       |      |      | 0.79 |      |      |     |      | 100   | 92           |
| 6    | 12       | Ap + Qz + | 50.21  |      |       |       |      | 0.34 | 22.55 | 0.67 |      | 21.83 | 1.20 | 2.27 | 0.92 |      |      |     |      | 100   | 125          |
| 6    | 13       | Feohy +   | 16.18  |      |       | 81.04 |      | 0.93 | 0.59  |      |      |       |      |      | 0.60 | 0.65 |      |     |      | 100   | 82           |
| 7    | 1        | Qz        | 98.93  |      | 0.81  |       |      |      |       |      | 0.26 |       |      |      |      |      |      |     |      | 100   | 110          |
| 7    | 2        | Cal + QZ  | 37.91  |      | 0.55  |       |      | 1.05 | 60.49 |      |      |       |      |      |      |      |      |     |      | 100   | 76           |
| 7    | 3        | Cal + Qz  | 38.93  |      |       |       |      | 1.02 | 60.06 |      |      |       |      |      |      |      |      |     |      | 100   | 75           |
| 7    | 4        | Feohy +   | 14.06  |      | 1.40  | 82.45 |      | 0.97 | 0.55  |      |      |       |      |      | 0.56 |      |      |     |      | 100   | 82           |
| 7    | 5        | Ap + Qz + | 29.92  |      |       |       |      | 0.48 | 32.03 | 0.97 |      | 28.65 | 1.70 | 4.85 | 1.40 |      |      |     |      | 100   | 115          |
| 7    | 6        | Ap + Qz + | 4.73   |      |       |       |      | 1.08 | 53.83 | 1.31 |      | 28.34 | 2.45 | 6.53 | 1.74 |      |      |     |      | 100   | 85           |
| 7    | 7        | Qz        | 100.00 |      |       |       |      |      |       |      |      |       |      |      |      |      |      |     |      | 100   | 119          |
| 7    | 8        | Qz        | 100.00 |      |       |       |      |      |       |      |      |       |      |      |      |      |      |     |      | 100   | 119          |
| 7    | 9        | Cal + Qz  | 45.11  |      |       | 3.70  |      | 0.54 | 50.25 |      |      |       |      |      | 0.40 |      |      |     |      | 100   | 71           |
| 7    | 10       | Cal + Qz  | 64.60  |      |       |       |      | 0.49 | 34.91 |      |      |       |      |      |      |      |      |     |      | 100   | 84           |
| 7    | 11       | Feohy +   | 43.44  |      | 3.81  | 48.46 |      | 1.81 | 0.70  | 0.61 | 0.23 |       |      |      | 0.94 |      |      |     |      | 100   | 95           |
| 7    | 12       | Cal + Qz  | 40.19  |      | 0.83  | 1.25  |      | 0.62 | 56.77 |      |      |       |      |      | 0.33 |      |      |     |      | 100   | 69           |
| 8    | 1        | Qz        | 99.15  |      | 0.65  |       |      |      |       |      | 0.20 |       |      |      |      |      |      |     |      | 100   | 108          |
| 8    | 2        | Cal       | 4.92   |      |       |       |      | 0.96 | 50.12 |      |      |       |      |      |      |      |      |     |      | 56    | 58           |
| 8    | 3        | Cal       | 2.38   |      |       | 2.97  |      | 0.77 | 49.88 |      |      |       |      |      |      |      |      |     |      | 56    | 55           |
| 8    | 4        | Cal + Qz  | 18.86  |      | 0.57  |       |      | 1.64 | 78.93 |      |      |       |      |      |      |      |      |     |      | 100   | 63           |
| 8    | 5        | Mix       | 54.40  | 0.96 | 15.37 | 3.58  |      | 4.18 | 10.92 | 3.03 | 1.91 |       | 4.23 |      | 1.42 |      |      |     |      | 100   | 37           |
| 8    | 6        | Cal       | 2.23   |      |       | 1.85  |      | 1.13 | 50.79 |      |      |       |      |      |      |      |      |     |      | 56    | 58           |

Table S11.1: Scanning Electron Microscope (SEM) mineral chemical analyses (EDS) of ARK2.

| Site | Position | Mineral  | SiO2   | TiO2 | Al2O3 | FeO   | MnO  | MgO  | CaO   | Na2O | K2O  | P2O5 | SO3 | F | Cl   | NiO | CuO | ZnO | WO3 | Total | Actual Total |
|------|----------|----------|--------|------|-------|-------|------|------|-------|------|------|------|-----|---|------|-----|-----|-----|-----|-------|--------------|
| 8    | 7        | Cal + Qz | 19.29  |      |       |       |      | 1.59 | 79.13 |      |      |      |     |   |      |     |     |     |     | 100   | 61           |
| 8    | 8        | Feohy +  | 28.17  |      | 1.00  | 68.14 | 0.54 | 1.03 | 0.67  |      |      |      |     |   | 0.46 |     |     |     |     | 100   | 85           |
| 8    | 9        | Feohy +  | 57.84  |      | 2.38  | 35.77 |      | 1.04 | 0.93  |      | 0.41 |      |     |   | 1.62 |     |     |     |     | 100   | 99           |
| 8    | 10       | Feohy +  | 25.43  |      | 3.57  | 65.82 |      | 2.05 | 1.00  | 0.66 |      |      |     |   | 1.46 |     |     |     |     | 100   | 80           |
| 8    | 11       | Cal      | 1.96   |      |       |       |      | 0.78 | 53.26 |      |      |      |     |   |      |     |     |     |     | 56    | 54           |
| 8    | 12       | Cal + Qz | 15.49  |      | 1.11  | 1.30  |      | 2.73 | 79.00 |      | 0.38 |      |     |   |      |     |     |     |     | 100   | 58           |
| 8    | 13       | Qz       | 100.00 |      |       |       |      |      |       |      |      |      |     |   |      |     |     |     |     | 100   | 115          |

Supplementary Material S12: SEM-BSE images and Electron Dispersive Spectroscopy (EDS) mineral analyses for sample SK5.



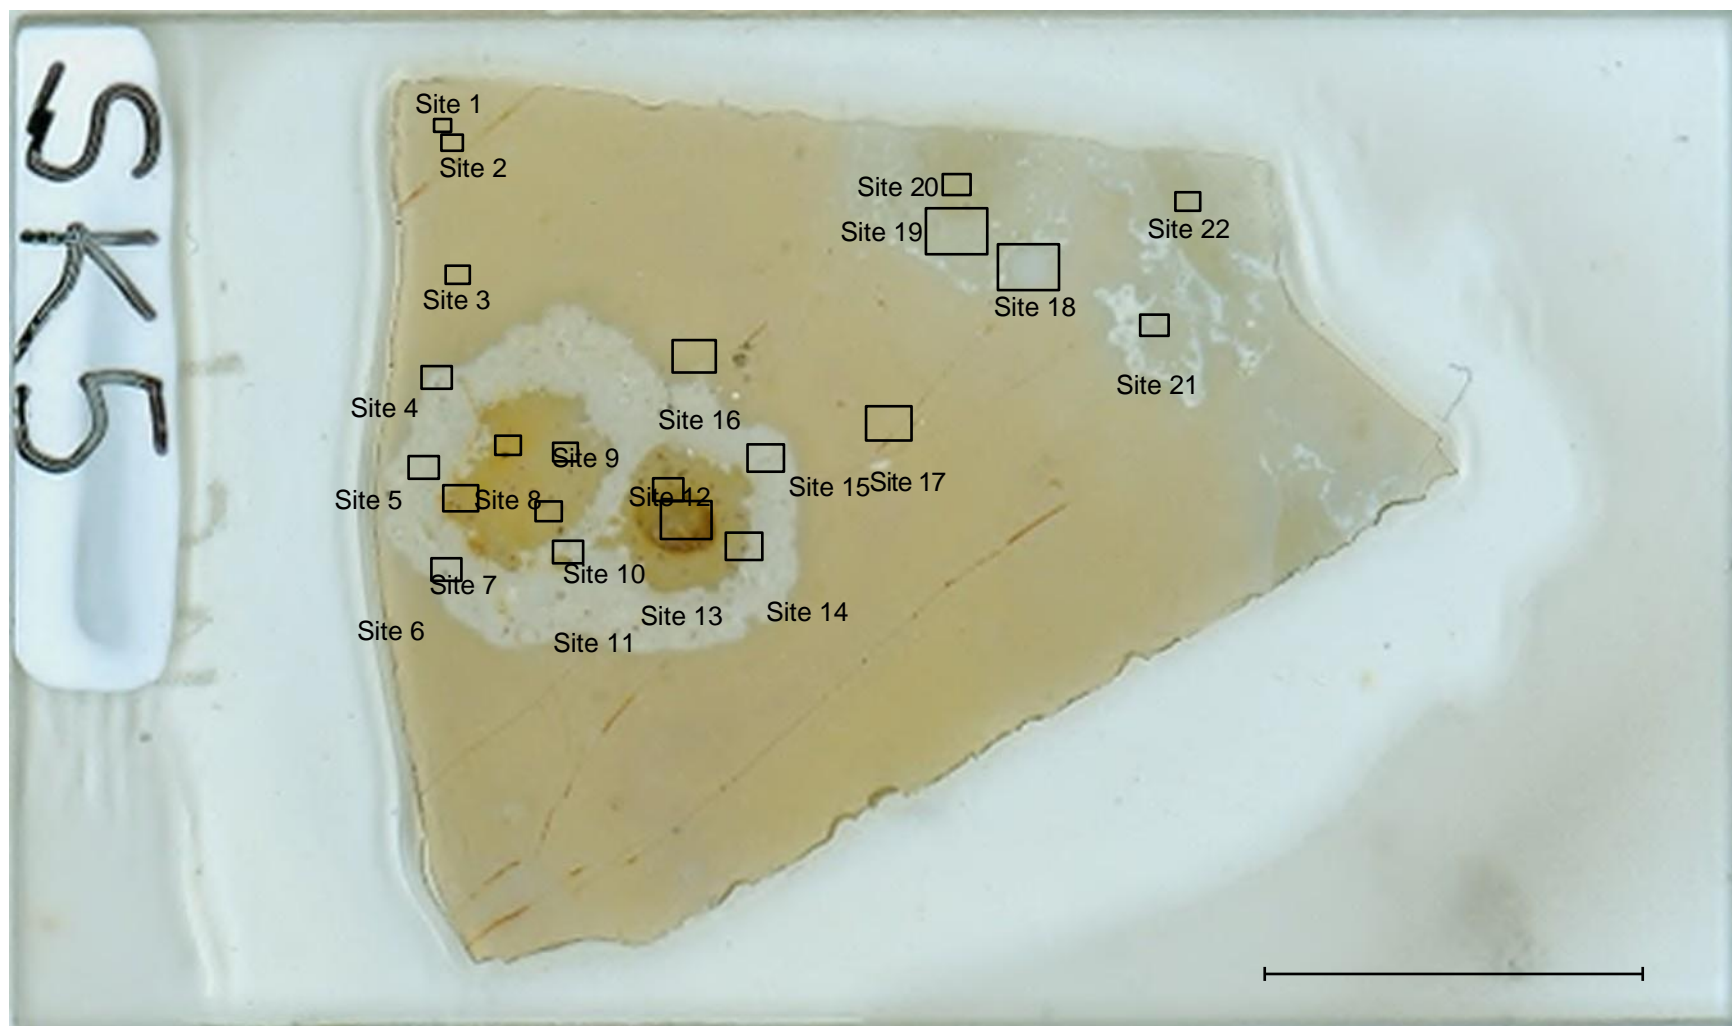

1 cm

Figure S12.1: SK5 thin section showing respective sites taken for mineral chemical analyses (EDS) via Scanning Electron Microscope (SEM).

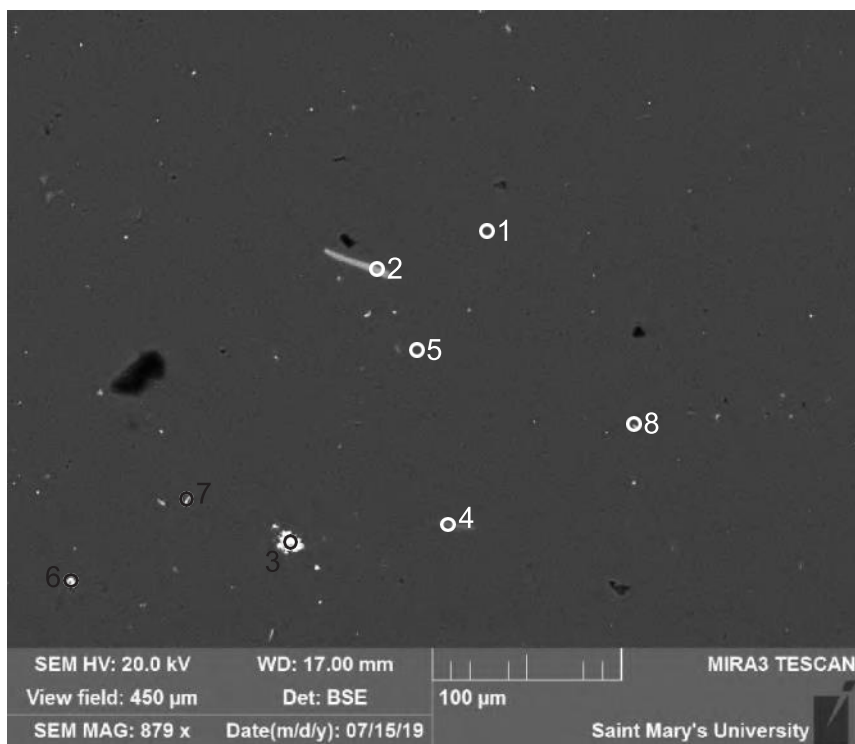

- 1:Quartz
- 2:Apatite + Quartz
- 3:Feohy +
- 4:Apatite + Quartz
- 5:Quartz
- 6:TiO<sub>2</sub> + Quartz
- 7:Quartz + Feohy
- 8:TiO<sub>2</sub> + Quartz

Figure S12.2: SK5 (SEM) Site 1 (Table S12.1).

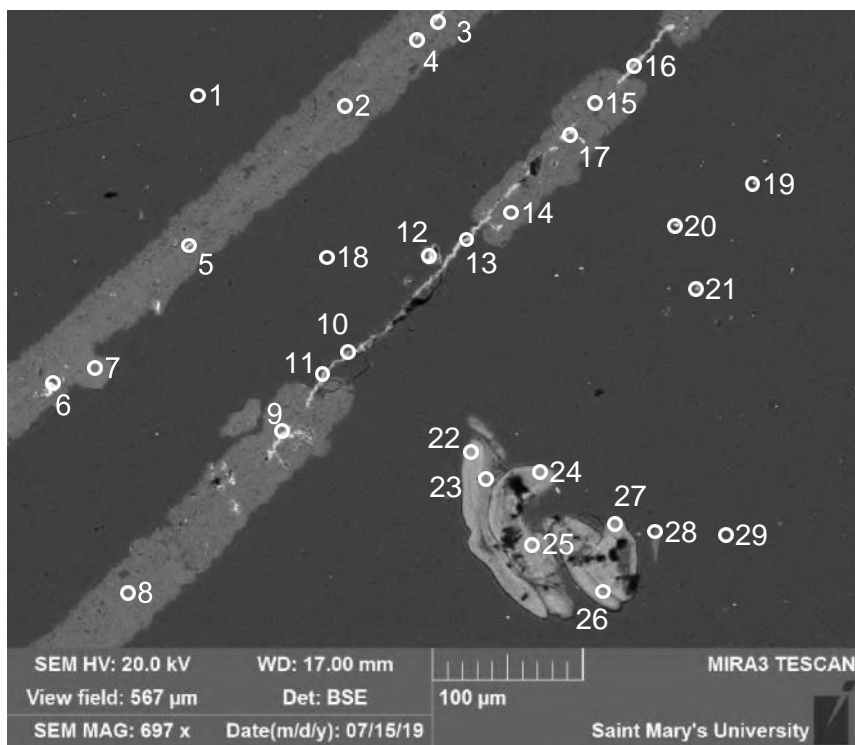

- 1:Quartz
- 2:Calcite + Quartz
- 3:Feohy + Calcite + Quartz +
- 4:Feohy + Calcite + Quartz +
- 5:Calcite + Goethite +
- 6:Goethite +
- 7:Calcite + Quartz
- 8:Calcite + Quartz
- 9:Calcite + Goethite +
- 10:Feohy + Quartz + Calcite
- 11:Feohy + Quartz + Calcite +
- 12:Feohy + Quartz + Calcite +
- 13:Feohy + Quartz +
- 14:Calcite + Quartz
- 15:Calcite + Quartz
- 16:Feohy + Quartz +
- 17:Feohy + Calcite +
- 18:Quartz
- 19:TiO<sub>2</sub> + Quartz
- 20:Feohy + Quartz
- 21:Feohy + Quartz
- 22:Apatite
- 23:Apatite + Quartz
- 24:Apatite +
- 25:Apatite +
- 26:Apatite
- 27:Apatite
- 28:Apatite + Quartz
- 29:Quartz + Feohy +

Figure S12.3: SK5 (SEM) Site 2 (Table S12.1).

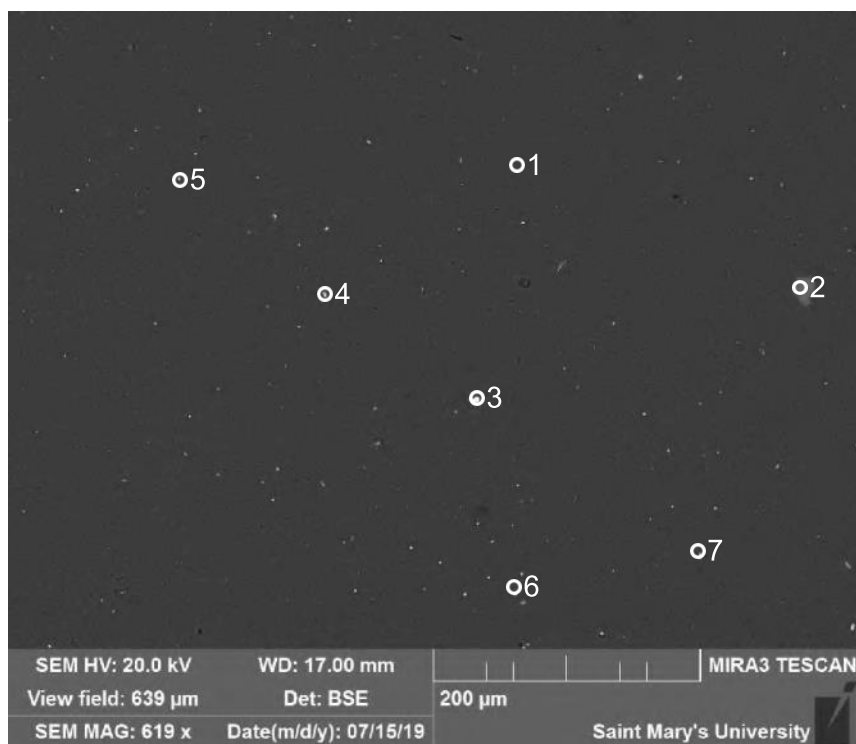

- 1:Quartz
- 2:Calcite + Quartz
- 3:Feohy +
- 4:Quartz + Feohy +
- 5:Quartz + Feohy +
- 6:Quartz + Feohy +
- 7:Quartz + Feohy +

Figure S12.4: SK5 (SEM) Site 3 (Table S12.1).

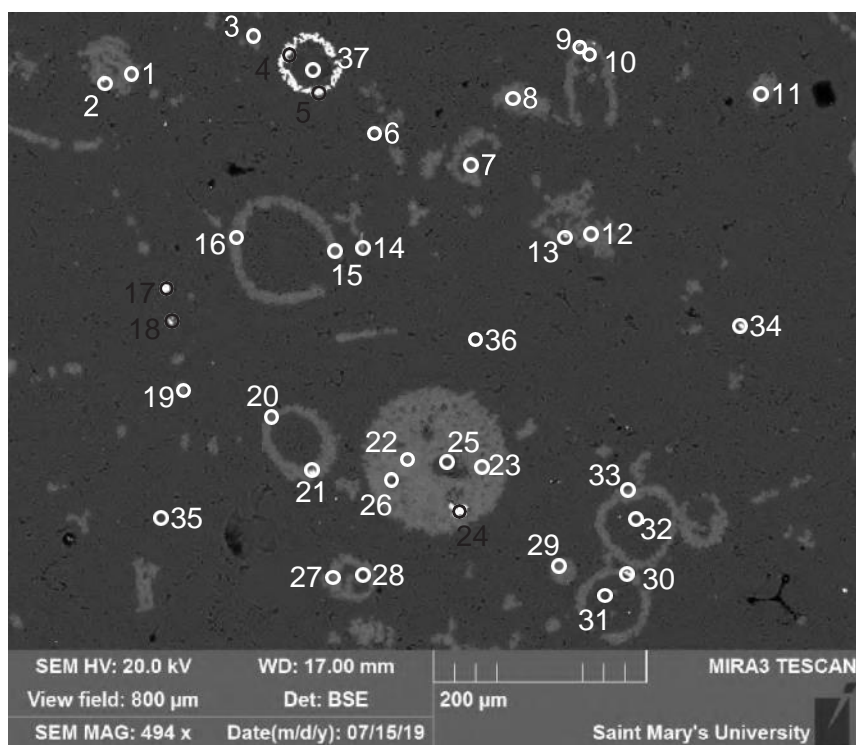

- 1:Calcite + Quartz
- 2:Feohy + Quartz +
- 3:Calcite + Quartz
- 4:Feohy + Quartz
- 5:Feohy + Quartz
- 6:Calcite + Quartz
- 7:Calcite + Quartz
- 8:Calcite + Quartz
- 9:Feohy + Calcite + Quartz
- 10:Calcite + Quartz
- 11:Calcite + Quartz
- 12:Calcite + Quartz
- 13:Feohy + Quartz +
- 14:Apatite + Quartz
- 15:Calcite + Quartz
- 16:Calcite + Quartz
- 17:Feohy + Quartz
- 18:Feohy + Quartz + Calcite +
- 19:Calcite + Quartz
- 20:Calcite + Quartz
- 21:Feohy + Quartz +
- 22:Calcite
- 23:Calcite
- 24:Feohy + Quartz +
- 25:Quartz
- 26:Quartz
- 27:Calcite + Quartz
- 28:Quartz
- 29:Calcite
- 30:Feohy + Quartz +
- 31:Quartz
- 32:Quartz
- 33:Calcite + Quartz
- 34:Feohy + Quartz +
- 35:Quartz
- 36:Quartz
- 37:Quartz

Figure S12.5: SK5 (SEM) Site 4 (Table S12.1).

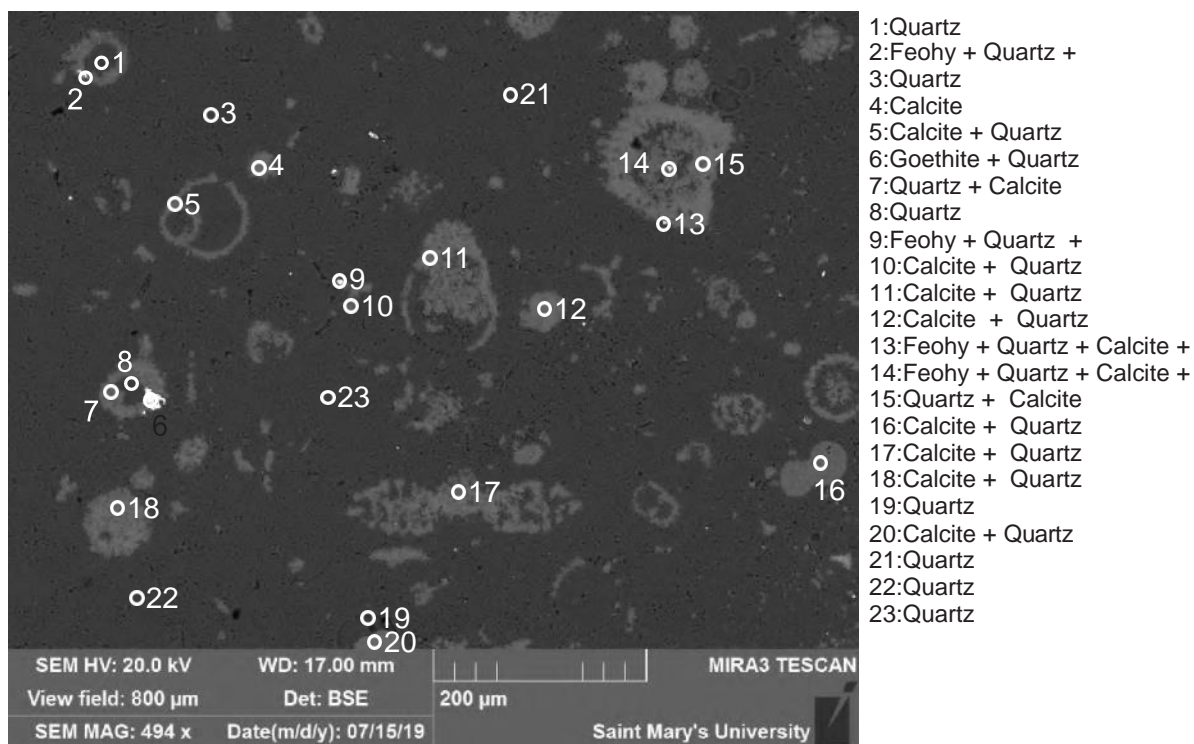

Figure S12.6: SK5 (SEM) Site 5 (Table S12.1).

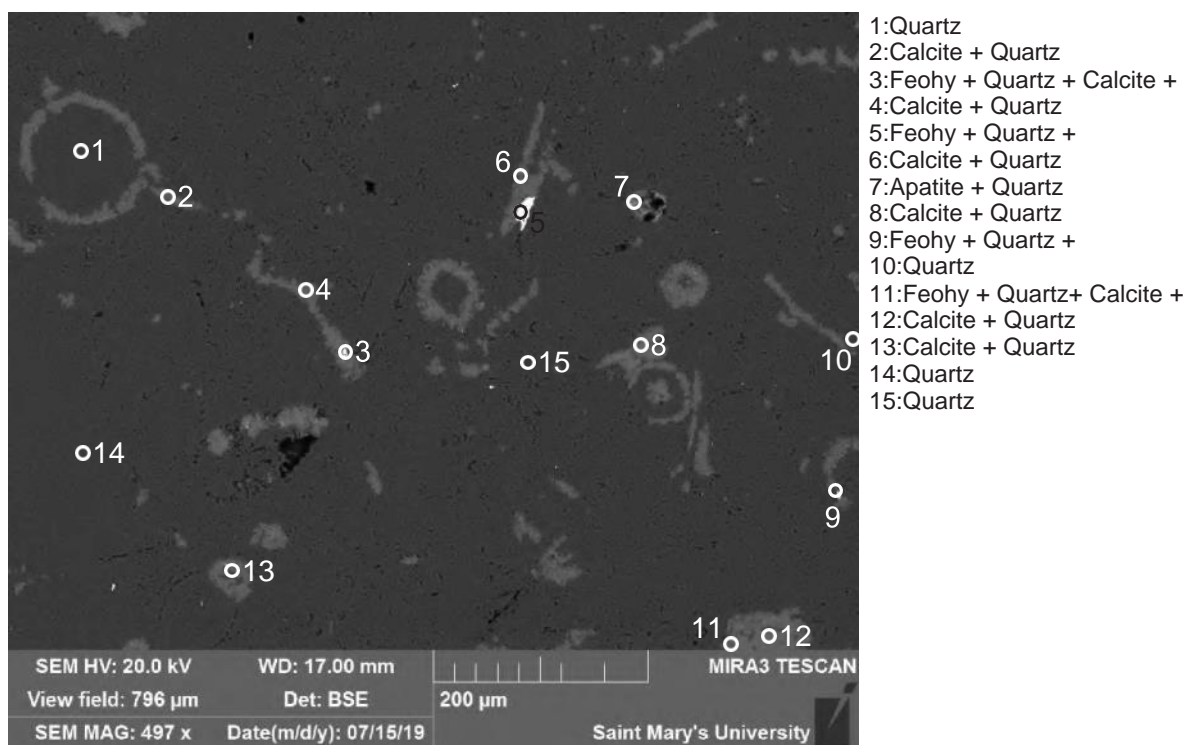

Figure S12.7: SK5 (SEM) Site 6 (Table S12.1).



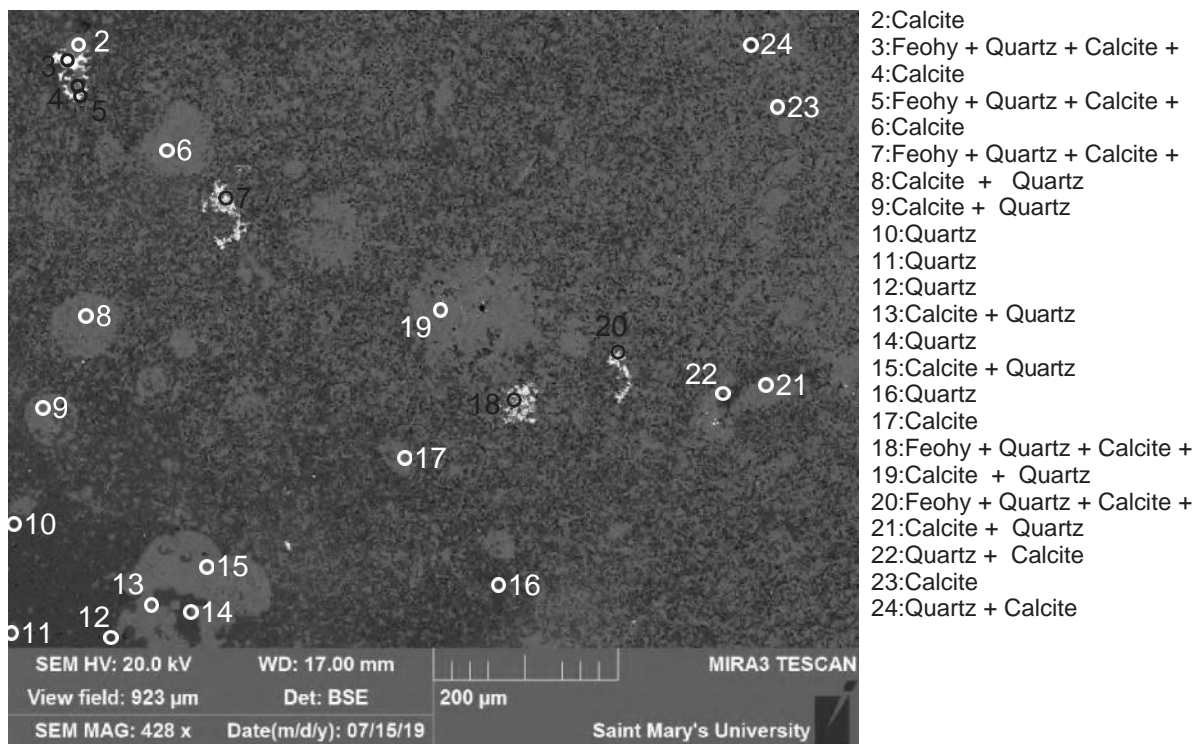

Figure S12.8: SK5 (SEM) Site 7 (Table S12.1).

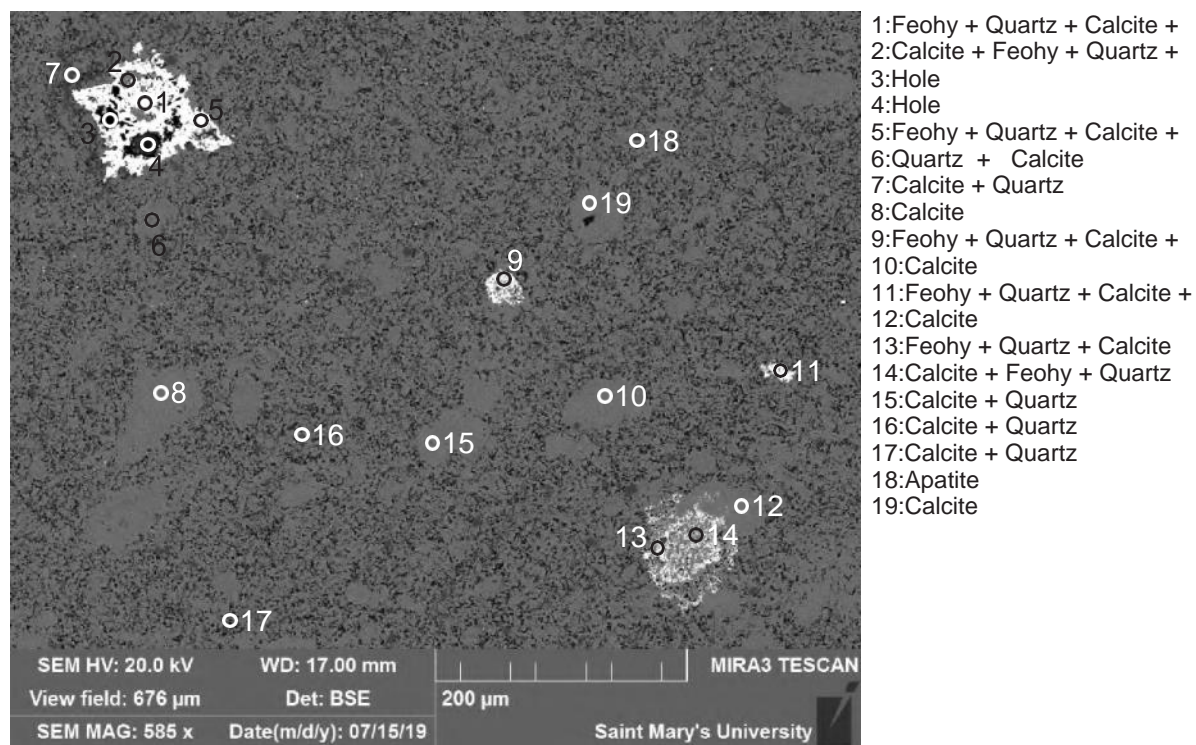

Figure S12.9: SK5 (SEM) Site 8 (Table S12.1).

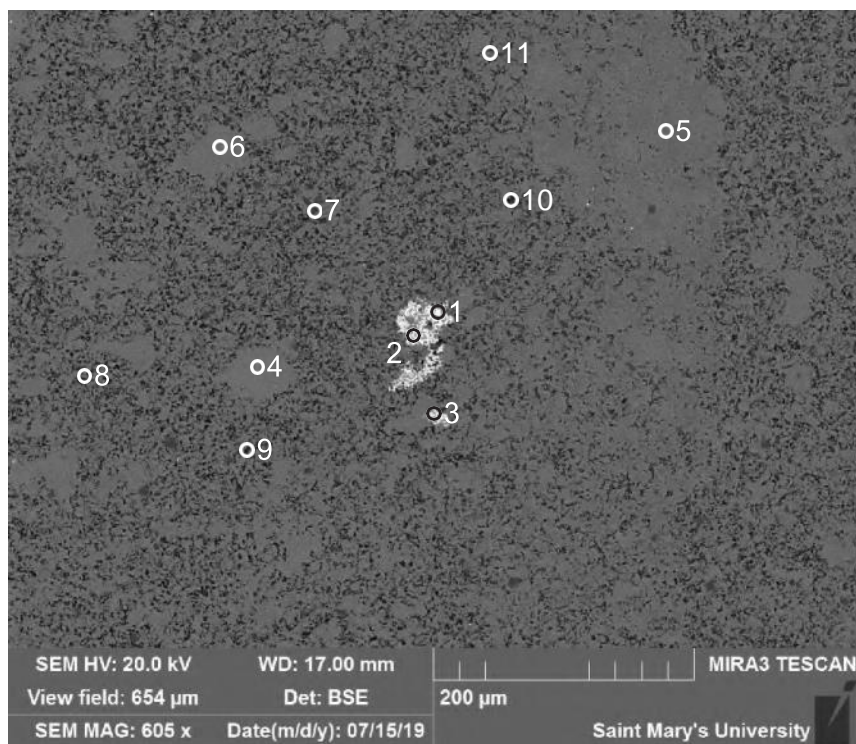

Figure S12.10: SK5 (SEM) Site 9 (Table S12.1).

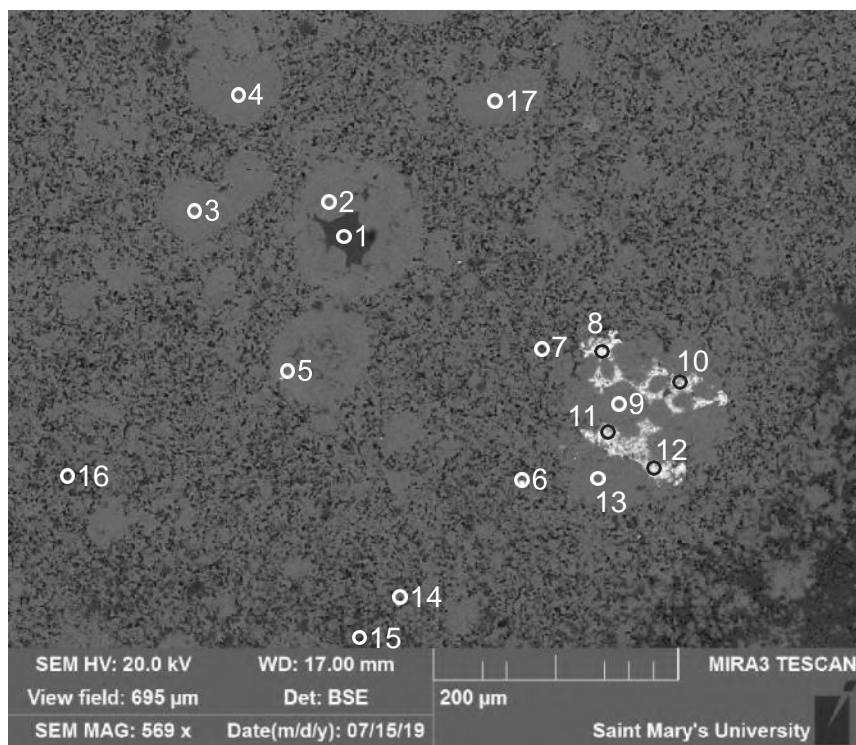

Figure S12.11: SK5 (SEM) Site 10 (Table S12.1).



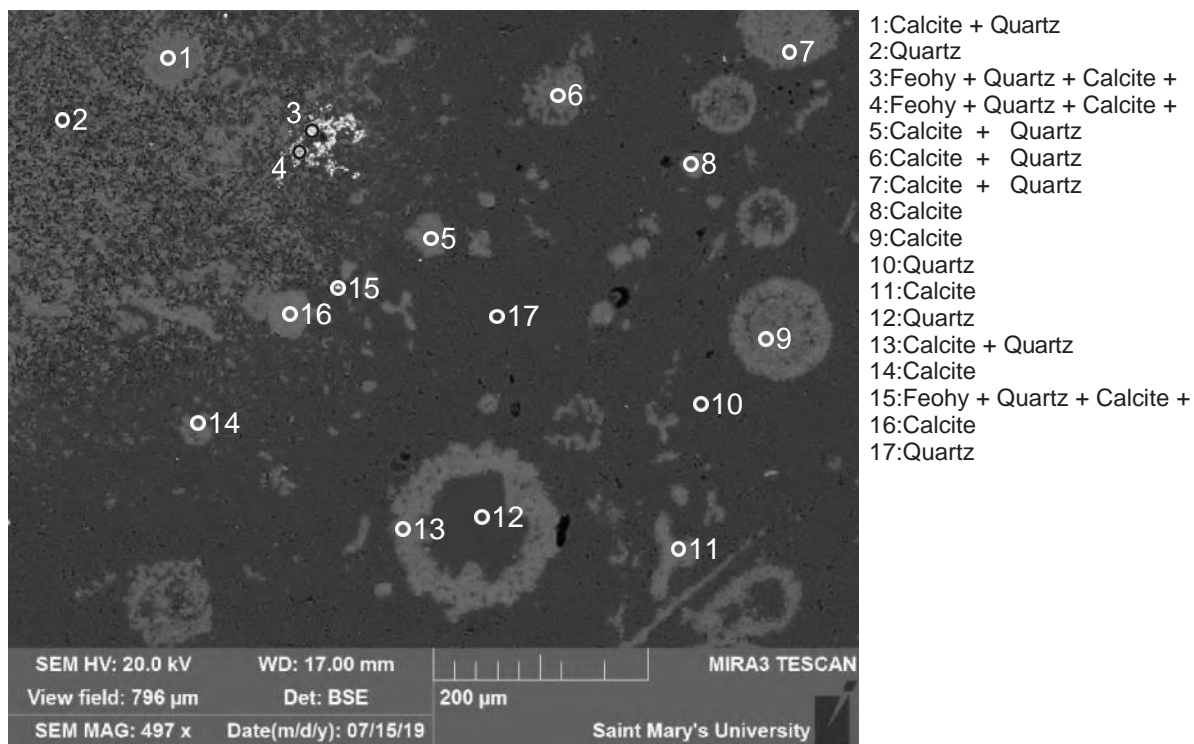

Figure S12.12: SK5 (SEM) Site 11 (Table S12.1).

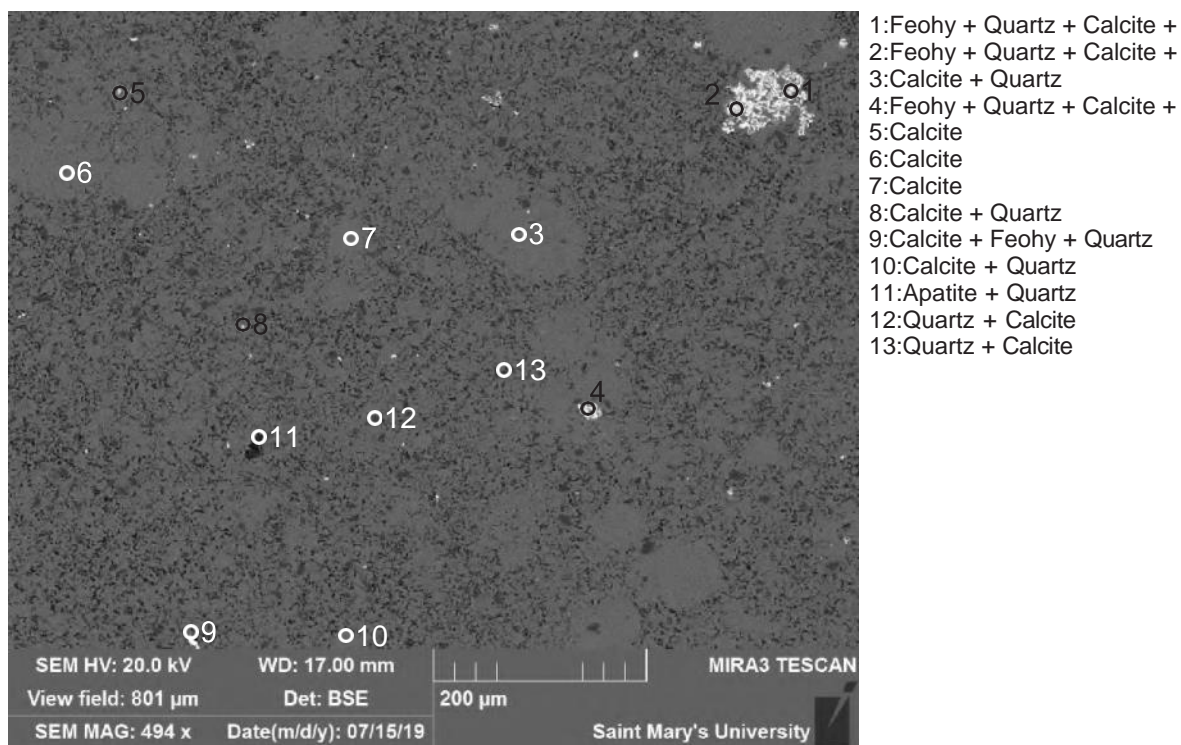

Figure S12.13: SK5 (SEM) Site 12 (Table S12.1).



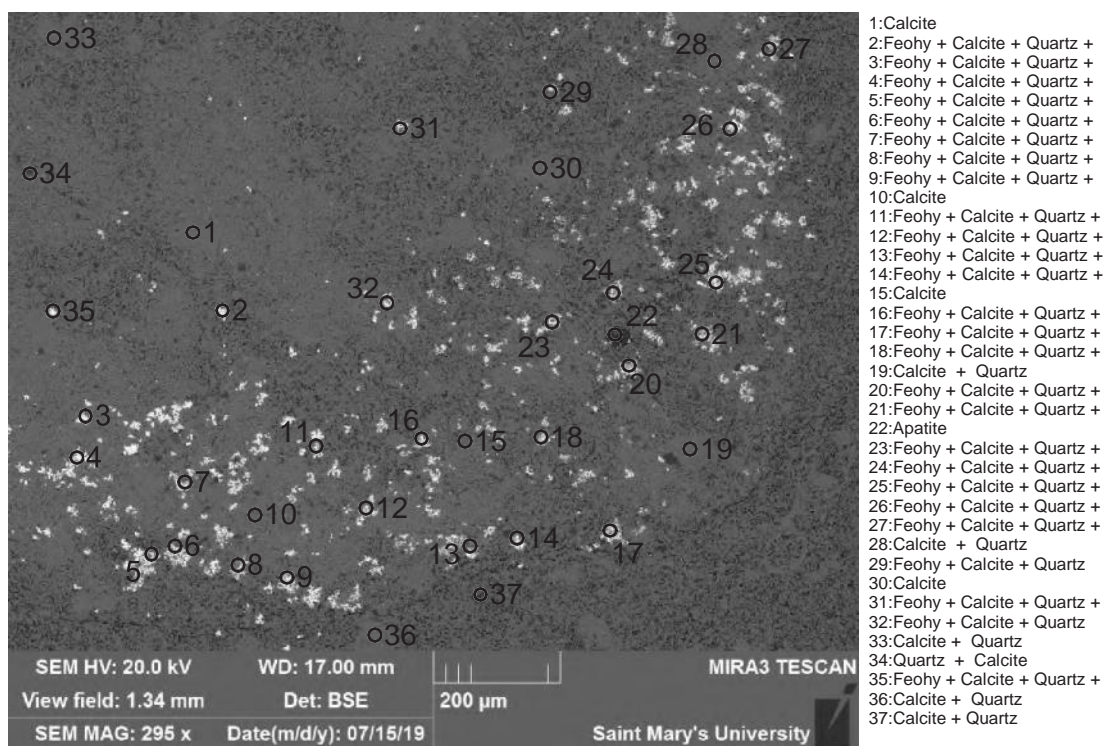

Figure S12.14: SK5 (SEM) Site 13 (Table S12.1).

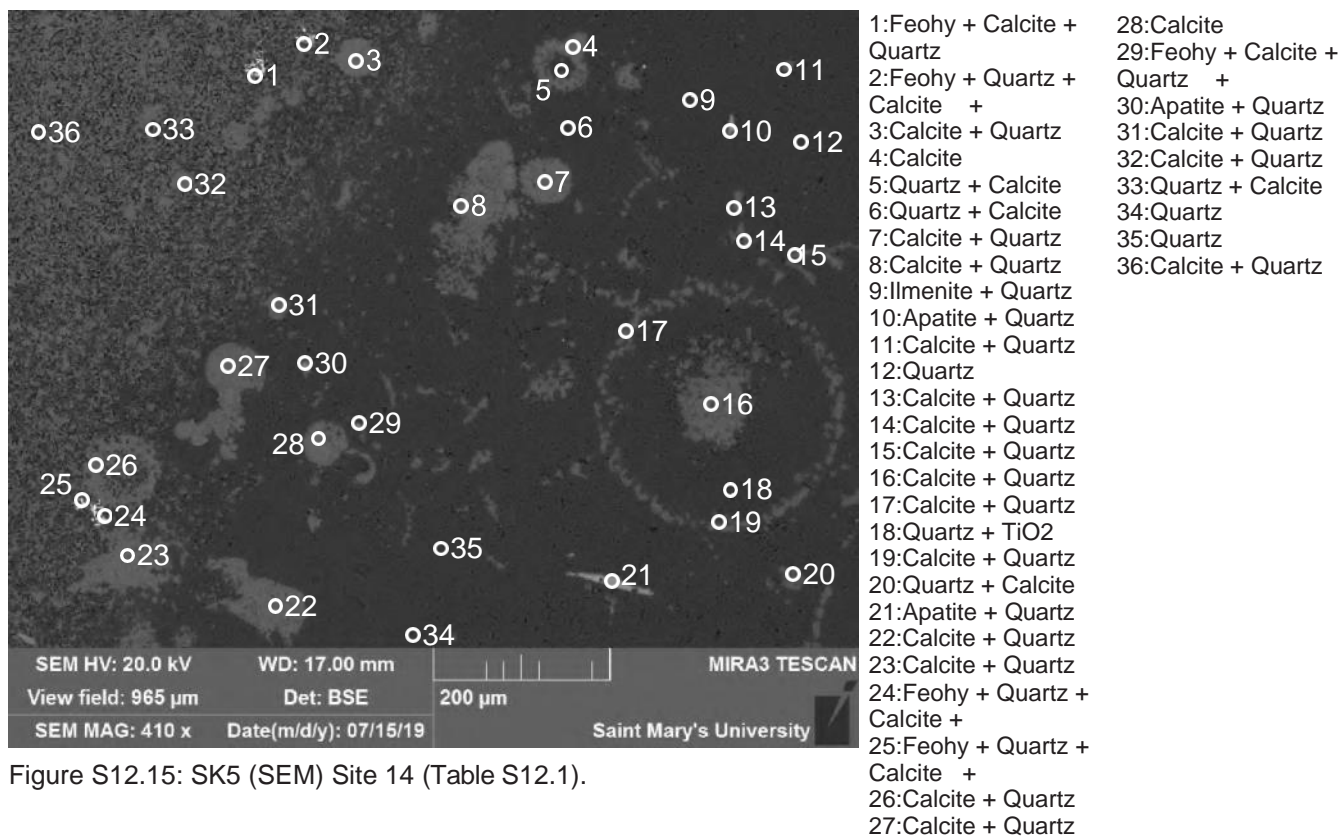

Figure S12.15: SK5 (SEM) Site 14 (Table S12.1).

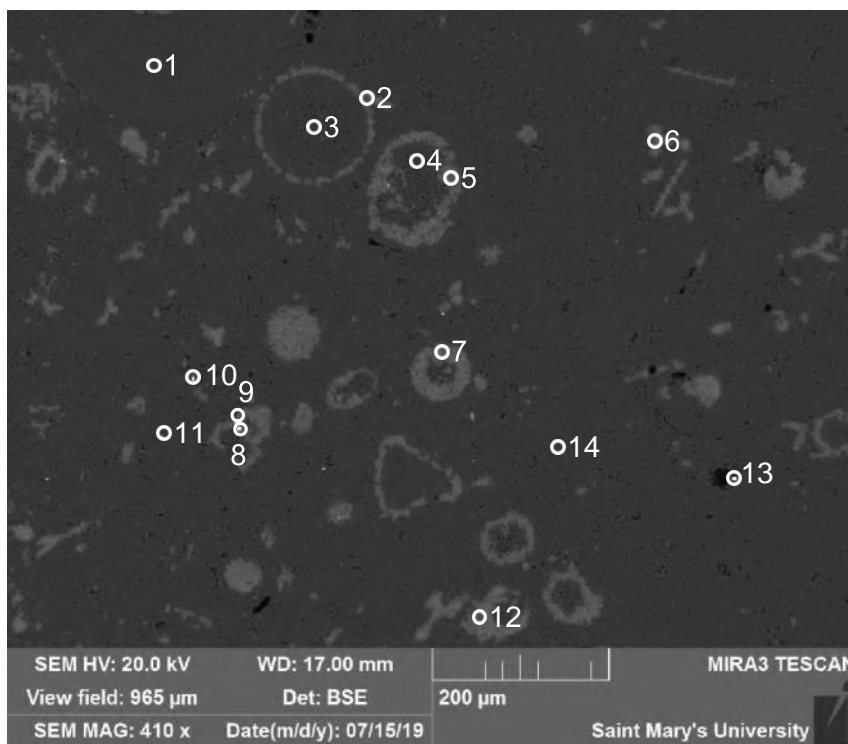

- 1:Quartz
- 2:Calcite + Quartz
- 3:Quartz + Calcite
- 4:Quartz
- 5:Calcite + Quartz
- 6:Calcite + Quartz
- 7:Calcite + Quartz
- 8:Feohy + Quartz + Calcite +
- 9:Feohy + Quartz + Calcite +
- 10:Zircon + Quartz
- 11:Feohy + Quartz +
- 12:Calcite + Quartz
- 13:Pyrite + Quartz
- 14:Quartz +

Figure S12.16: SK5 (SEM) Site 15 (Table S12.1).

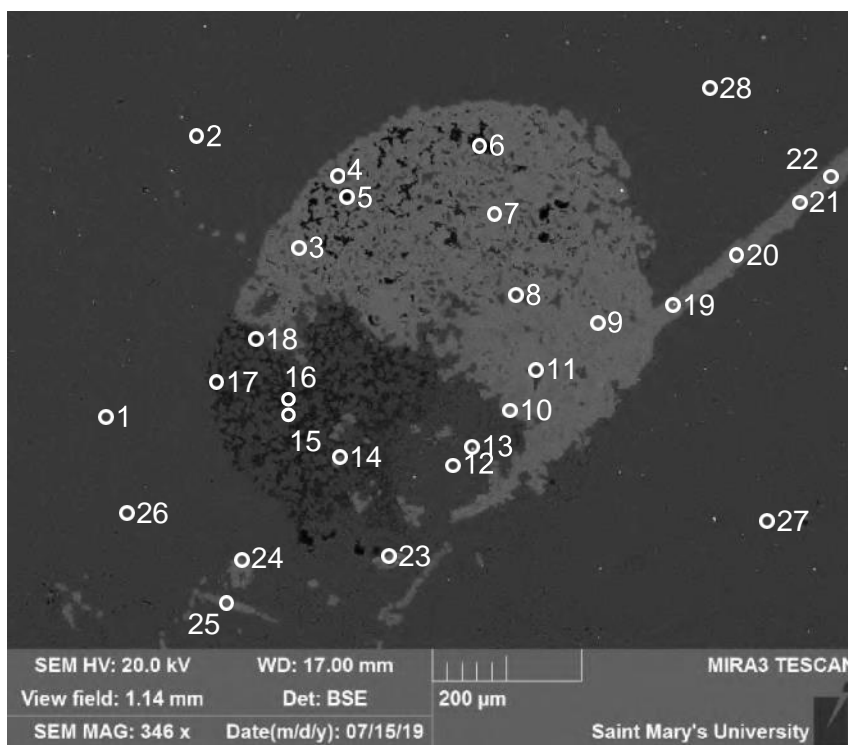

- 1:Quartz
- 2:Quartz
- 3:Calcite + Quartz
- 4:Quartz
- 5:Quartz + Calcite
- 6:Quartz + Calcite
- 7:Quartz + Calcite
- 8:Quartz + Calcite
- 9:Calcite +
- 10:Apatite + Quartz
- 11:Quartz
- 12:Quartz +
- 13:TiO<sub>2</sub> + Quartz
- 14:Calcite + Quartz
- 15:Quartz
- 16:Quartz
- 17:Quartz
- 18:Quartz
- 19:Pyrite + Calcite + Quartz
- 20:Calcite + Quartz
- 21:Feohy + Calcite + Quartz +
- 22:Calcite + Quartz
- 23:Calcite + Quartz
- 24:Calcite + Quartz
- 25:Calcite + Quartz
- 26:Quartz
- 27:Quartz
- 28:Quartz

Figure S12.17: SK5 (SEM) Site 16 (Table S12.1).

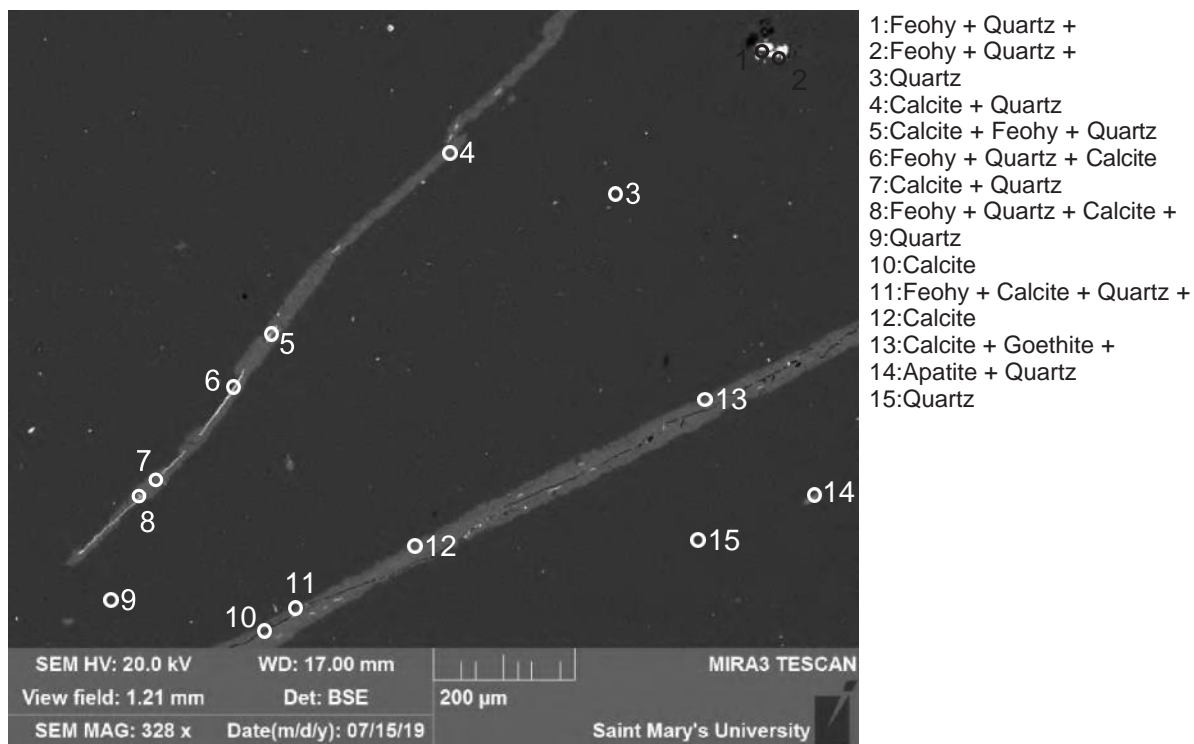

Figure S12.18: SK5 (SEM) Site 17 (Table S12.1).

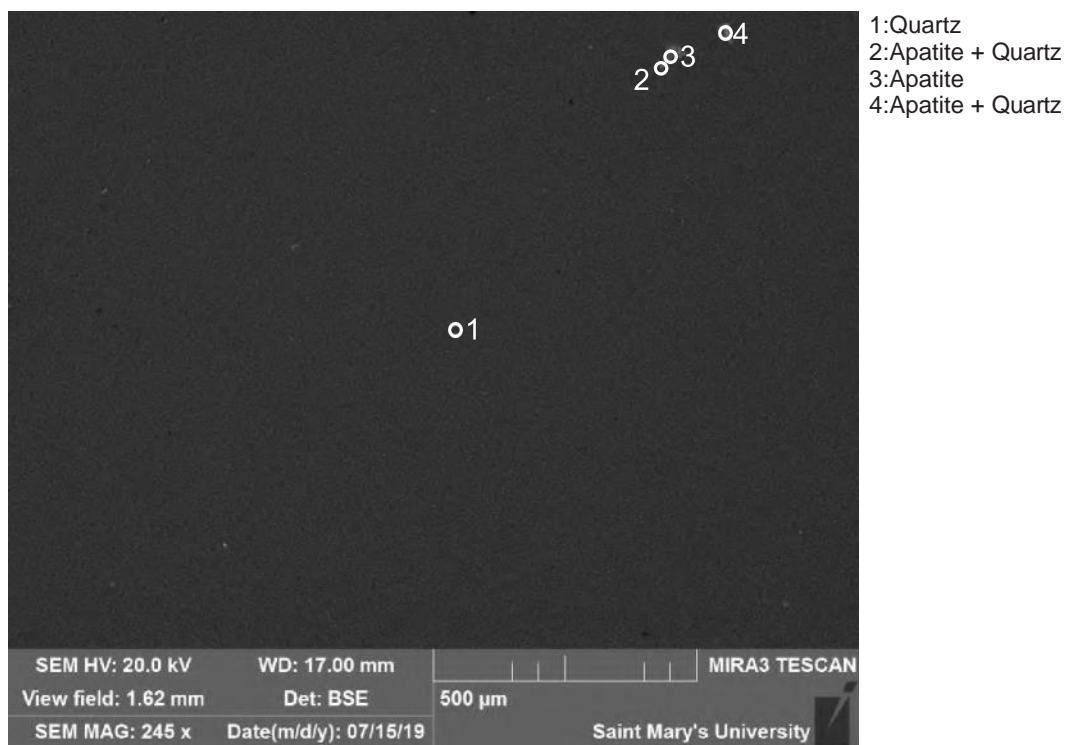

Figure S12.19: SK5 (SEM) Site 18 (Table S12.1).



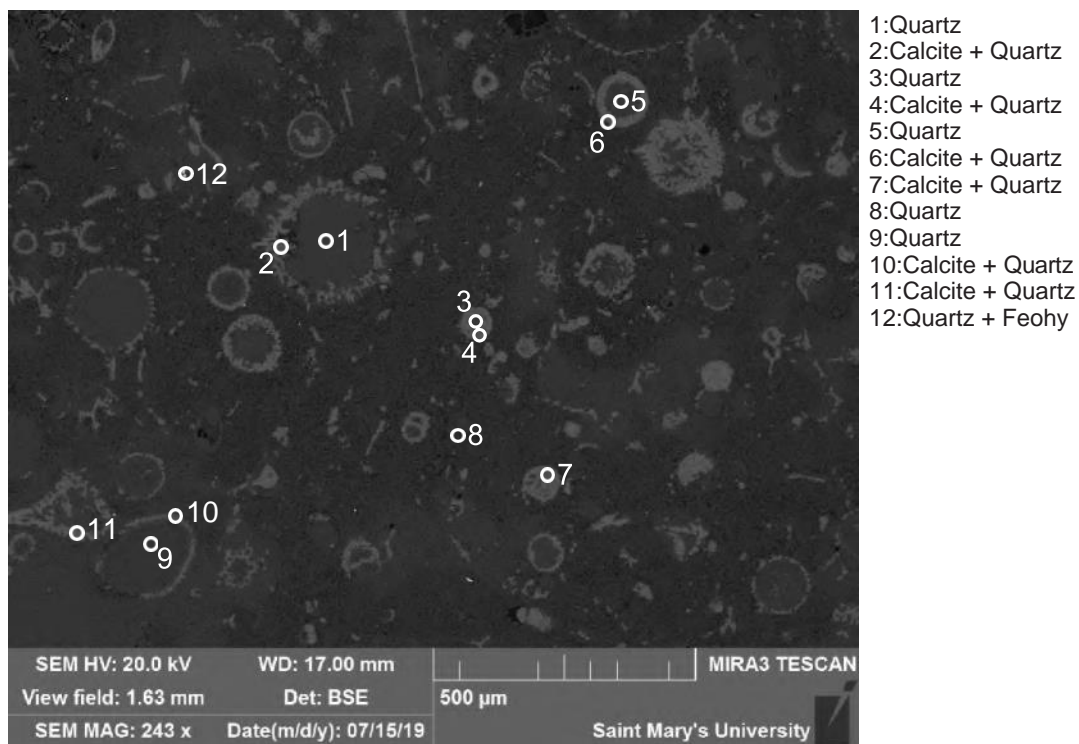

Figure S12.20: SK5 (SEM) Site 19 (Table S12.1).

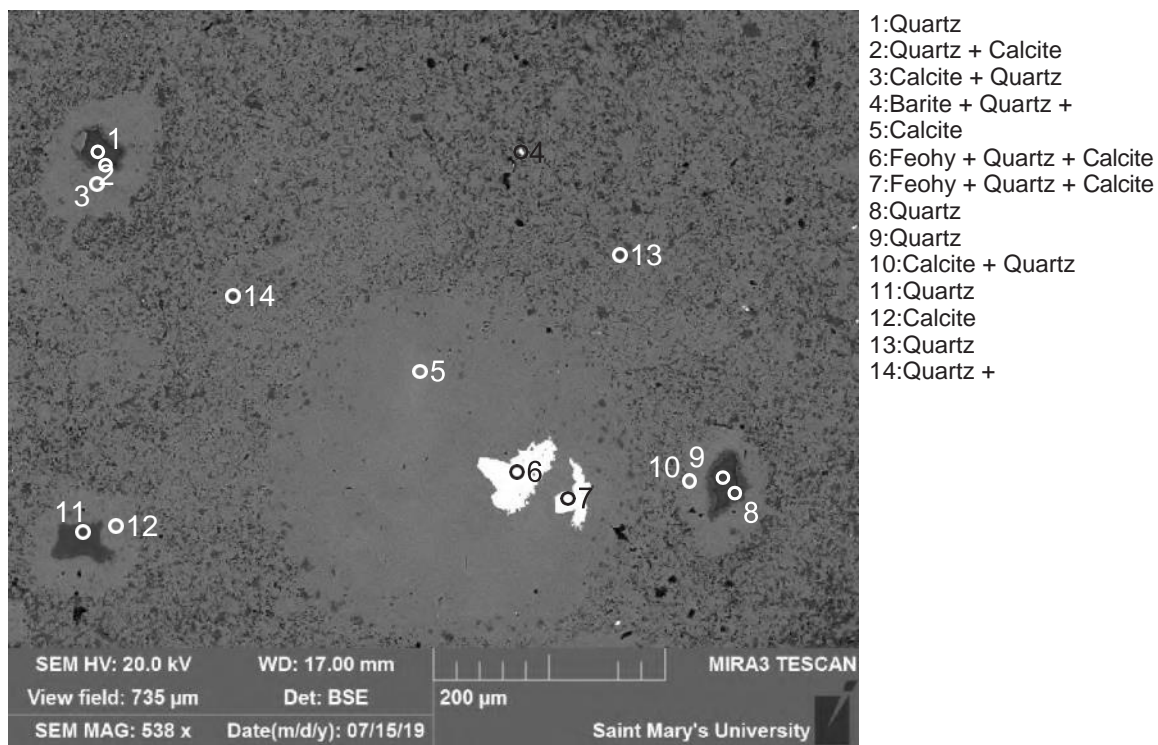

Figure S12.21: SK5 (SEM) Site 20 (Table S12.1).

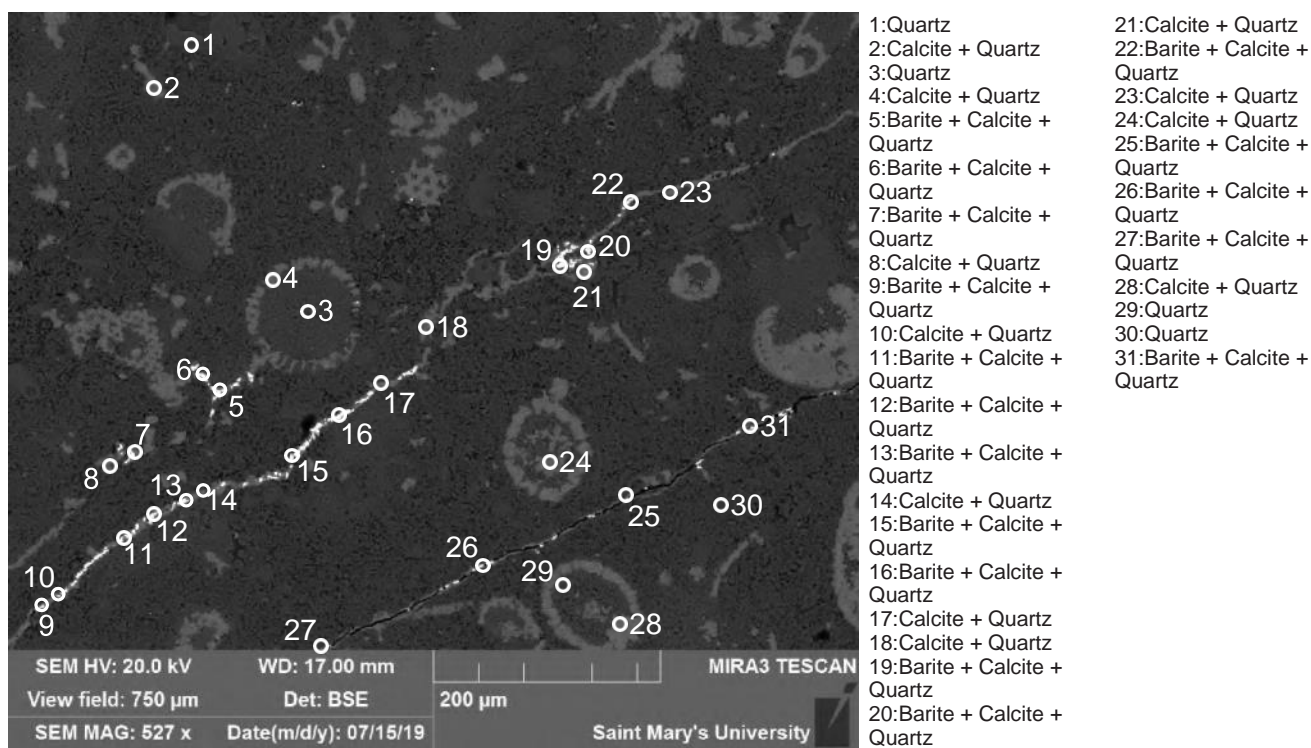

Figure S12.22: SK5 (SEM) Site 21 (Table S12.1).

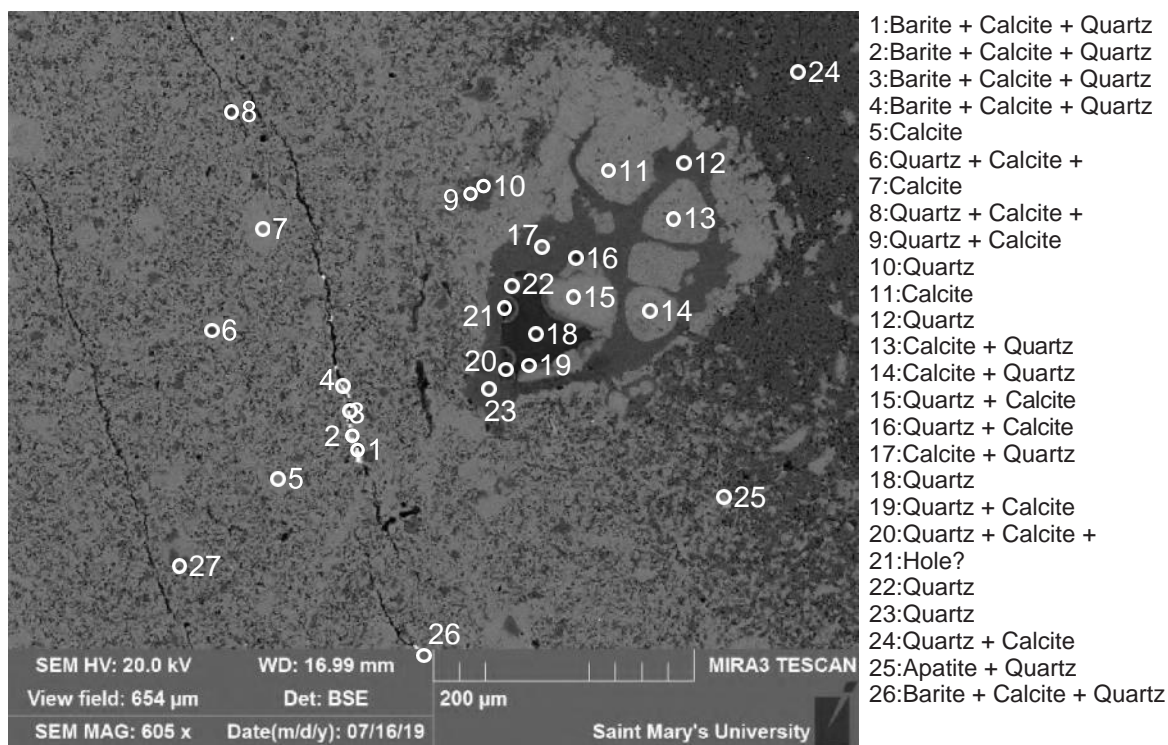

Figure S12.23: SK5 (SEM) Site 22 (Table S12.1).

27: Calcite + Quartz +

Figure S12.23: SK5 (SEM) Site 22 (Table S12.1).

Table S12.1: Scanning Electron Microscope (SEM) mineral chemical analyses (EDS) of SK5.

| Site | Position | Mineral            | SiO2  | TiO2  | Al2O3 | FeO   | MnO | MgO  | CaO   | Na2O | K2O  | P2O5  | SO3  | F    | Cl   | Cr2O3 | CoO | CuO | ZnO | ZrO2 | Ag2O | BaO | La2O3 | Ce2O3 | Nd2O3 | WO3  | Total | Actual Total |
|------|----------|--------------------|-------|-------|-------|-------|-----|------|-------|------|------|-------|------|------|------|-------|-----|-----|-----|------|------|-----|-------|-------|-------|------|-------|--------------|
| 1    | 1        | Qz                 | 100   |       |       |       |     |      |       |      |      |       |      |      |      |       |     |     |     |      |      |     |       |       |       |      | 100   | 114          |
| 1    | 2        | Ap + Qz            | 4.84  |       |       |       |     |      | 48.6  |      |      | 38.12 | 1.6  | 6.84 |      |       |     |     |     |      |      |     |       |       |       |      | 100   | 103          |
| 1    | 3        | Feohy +            | 11.26 |       | 1.79  | 83.86 |     | 2.46 | 0.63  |      |      |       |      |      |      |       |     |     |     |      |      |     |       |       |       |      | 100   | 76           |
| 1    | 4        | Ap + Qz            | 47.65 |       |       | 1.15  |     |      | 28.81 |      |      | 19.43 | 1    | 1.96 |      |       |     |     |     |      |      |     |       |       |       |      | 100   | 102          |
| 1    | 5        | Qz                 | 100   |       |       |       |     |      |       |      |      |       |      |      |      |       |     |     |     |      |      |     |       |       |       |      | 100   | 115          |
| 1    | 6        | TiO2 + Qz          | 24.67 | 73.76 |       | 1.57  |     |      |       |      |      |       |      |      |      |       |     |     |     |      |      |     |       |       |       |      | 100   | 109          |
| 1    | 7        | Qz + Feohy         | 77.87 |       | 1.1   | 20.16 |     | 0.63 |       |      | 0.24 |       |      |      |      |       |     |     |     |      |      |     |       |       |       |      | 100   | 110          |
| 1    | 8        | TiO2 + Qz          | 56.05 | 42.71 |       | 1     |     |      | 0.24  |      |      |       |      |      |      |       |     |     |     |      |      |     |       |       |       |      | 100   | 118          |
| 2    | 1        | Qz                 | 100   |       |       |       |     |      |       |      |      |       |      |      |      |       |     |     |     |      |      |     |       |       |       |      | 100   | 112          |
| 2    | 2        | Cal + Qz           | 18.46 |       |       |       |     |      | 81.54 |      |      |       |      |      |      |       |     |     |     |      |      |     |       |       |       |      | 100   | 62           |
| 2    | 3        | Feohy + Cal + Qz + | 7.68  |       | 1.18  | 59.13 |     | 1.35 | 30.66 |      |      |       |      |      |      |       |     |     |     |      |      |     |       |       |       |      | 100   | 69           |
| 2    | 4        | Feohy + Cal + Qz + | 11.88 |       | 0.74  | 49.28 |     | 1.19 | 36.9  |      |      |       |      |      |      |       |     |     |     |      |      |     |       |       |       |      | 100   | 71           |
| 2    | 5        | Cal + Gth +        | 9.73  |       | 1.12  | 42.01 |     | 1.66 | 45.49 |      |      |       |      |      |      |       |     |     |     |      |      |     |       |       |       |      | 100   | 68           |
| 2    | 6        | Gth +              | 18.54 |       | 2.79  | 73.33 |     | 2.08 | 3.26  |      |      |       |      |      |      |       |     |     |     |      |      |     |       |       |       |      | 100   | 76           |
| 2    | 7        | Cal + Qz           | 2.69  |       |       |       |     | 0.89 | 96.42 |      |      |       |      |      |      |       |     |     |     |      |      |     |       |       |       |      | 100   | 54           |
| 2    | 8        | Cal + Qz           | 7.81  |       |       |       |     | 0.7  | 91.49 |      |      |       |      |      |      |       |     |     |     |      |      |     |       |       |       |      | 100   | 57           |
| 2    | 9        | Cal + Gth +        | 19.17 |       | 1.32  | 47.57 |     | 1.48 | 30.46 |      |      |       |      |      |      |       |     |     |     |      |      |     |       |       |       |      | 100   | 70           |
| 2    | 10       | Feohy + Qz + Cal   | 67.38 |       | 1.07  | 29.6  |     | 0.85 | 1.1   |      |      |       |      |      |      |       |     |     |     |      |      |     |       |       |       |      | 100   | 101          |
| 2    | 11       | Feohy + Qz + Cal + | 67.64 |       | 1.14  | 29.05 |     | 1.02 | 1.15  |      |      |       |      |      |      |       |     |     |     |      |      |     |       |       |       |      | 100   | 97           |
| 2    | 12       | Feohy + Qz + Cal + | 29.16 |       | 1.75  | 65.46 |     | 2.23 | 1.38  |      |      |       |      |      |      |       |     |     |     |      |      |     |       |       |       |      | 100   | 81           |
| 2    | 13       | Feohy + Qz +       | 61.22 |       | 1.62  | 34.97 |     | 0.76 | 1.19  |      | 0.24 |       |      |      |      |       |     |     |     |      |      |     |       |       |       |      | 100   | 99           |
| 2    | 14       | Cal + Qz           | 27.52 |       |       | 1.23  |     |      | 71.24 |      |      |       |      |      |      |       |     |     |     |      |      |     |       |       |       |      | 100   | 66           |
| 2    | 15       | Cal + Qz           | 33.39 |       |       |       |     | 0.54 | 66.07 |      |      |       |      |      |      |       |     |     |     |      |      |     |       |       |       |      | 100   | 70           |
| 2    | 16       | Feohy + Qz +       | 65.41 |       | 1.15  | 31.52 |     | 0.8  | 1.12  |      |      |       |      |      |      |       |     |     |     |      |      |     |       |       |       |      | 100   | 100          |
| 2    | 17       | Feohy + Cal +      | 19.44 |       | 3.2   | 55.72 |     | 1.55 | 18.63 |      | 0.41 | 1.05  |      |      |      |       |     |     |     |      |      |     |       |       |       |      | 100   | 76           |
| 2    | 18       | Qz                 | 100   |       |       |       |     |      |       |      |      |       |      |      |      |       |     |     |     |      |      |     |       |       |       |      | 100   | 110          |
| 2    | 19       | TiO2 + Qz          | 48.04 | 51.67 |       | 0.29  |     |      |       |      |      |       |      |      |      |       |     |     |     |      |      |     |       |       |       |      | 100   | 115          |
| 2    | 20       | Feohy + Qz         | 64.48 |       |       | 34.32 |     | 0.91 | 0.29  |      |      |       |      |      |      |       |     |     |     |      |      |     |       |       |       |      | 100   | 102          |
| 2    | 21       | Feohy + Qz         | 71.12 |       | 0.82  | 26.92 |     | 0.79 | 0.34  |      |      |       |      |      |      |       |     |     |     |      |      |     |       |       |       |      | 100   | 99           |
| 2    | 22       | Ap                 | 0.5   |       |       |       |     |      | 49.71 | 0.84 |      | 39.52 | 1.63 | 6.36 |      |       |     |     |     |      |      |     |       |       |       | 1.44 | 100   | 103          |
| 2    | 23       | Ap + Qz            | 5.07  |       |       |       |     |      | 49.91 | 0.72 |      | 38.24 | 1.53 | 4.52 |      |       |     |     |     |      |      |     |       |       |       |      | 100   | 92           |
| 2    | 24       | Ap +               | 0.64  |       |       |       |     |      | 50.05 | 1.12 |      | 39.67 | 1.57 | 5.61 |      |       |     |     |     |      |      |     |       |       |       | 1.34 | 100   | 100          |
| 2    | 25       | Ap +               | 1.28  |       |       |       |     |      | 50.35 | 1.02 |      | 39.39 | 1.62 | 6.33 |      |       |     |     |     |      |      |     |       |       |       |      | 100   | 100          |
| 2    | 26       | Ap                 | 0.83  |       |       |       |     |      | 49.65 | 1.01 |      | 39.68 | 1.52 | 5.85 |      |       |     |     |     |      |      |     |       |       |       | 1.46 | 100   | 103          |
| 2    | 27       | Ap                 | 0.75  |       |       |       |     |      | 50.27 | 1.04 |      | 39.52 | 1.64 | 5.4  |      |       |     |     |     |      |      |     |       |       |       | 1.38 | 100   | 101          |
| 2    | 28       | Ap + Qz            | 41.28 |       |       | 2.01  |     |      | 31.63 | 0.42 |      | 23.65 | 1.01 |      |      |       |     |     |     |      |      |     |       |       |       |      | 100   | 99           |
| 2    | 29       | Qz + Feohy +       | 63.4  |       | 1.39  | 33.8  |     | 0.91 | 0.49  |      |      |       |      |      |      |       |     |     |     |      |      |     |       |       |       |      | 100   | 107          |
| 3    | 1        | Qz                 | 100   |       |       |       |     |      |       |      |      |       |      |      |      |       |     |     |     |      |      |     |       |       |       |      | 100   | 111          |
| 3    | 2        | Cal + Qz           | 2.28  |       |       |       |     | 0.68 | 97.04 |      |      |       |      |      |      |       |     |     |     |      |      |     |       |       |       |      | 100   | 56           |
| 3    | 3        | Feohy +            | 27.5  |       | 0.77  | 69.82 |     | 1.46 | 0.45  |      |      |       |      |      |      |       |     |     |     |      |      |     |       |       |       |      | 100   | 86           |
| 3    | 4        | Qz + Feohy +       | 83.44 |       |       | 16.21 |     | 0.35 |       |      |      |       |      |      |      |       |     |     |     |      |      |     |       |       |       |      | 100   | 95           |
| 3    | 5        | Qz + Feohy +       | 66.82 |       | 4.06  | 27.44 |     | 0.73 |       |      | 0.94 |       |      |      |      |       |     |     |     |      |      |     |       |       |       |      | 100   | 100          |
| 3    | 6        | Qz + Feohy +       | 79.15 |       | 1.17  | 18.87 |     | 0.81 |       |      |      |       |      |      |      |       |     |     |     |      |      |     |       |       |       |      | 100   | 109          |
| 3    | 7        | Qz + Feohy +       | 65.63 |       | 2.26  | 30.27 |     | 1.12 | 0.33  |      | 0.4  |       |      |      |      |       |     |     |     |      |      |     |       |       |       |      | 100   | 106          |
| 4    | 1        | Cal + Qz           | 33.99 |       |       |       |     |      | 66.01 |      |      |       |      |      |      |       |     |     |     |      |      |     |       |       |       |      | 100   | 65           |
| 4    | 2        | Feohy + Qz +       | 11.55 | 0.49  | 2.87  | 79.39 |     | 2.4  | 2.97  |      |      |       |      |      | 0.32 |       |     |     |     |      |      |     |       |       |       |      | 100   | 72           |
| 4    | 3        | Cal + Qz           | 28.84 |       |       |       |     |      | 71.16 |      |      |       |      |      |      |       |     |     |     |      |      |     |       |       |       |      | 100   | 63           |
| 4    | 4        | Feohy + Qz         | 6.26  |       |       | 92.04 |     | 1.7  |       |      |      |       |      |      |      |       |     |     |     |      |      |     |       |       |       |      | 100   | 74           |
| 4    | 5        | Feohy + Qz         | 9.91  |       | 1.85  | 85.19 |     | 2.32 | 0.73  |      |      |       |      |      |      |       |     |     |     |      |      |     |       |       |       |      | 100   | 71           |
| 4    | 6        | Cal + Qz           | 27.28 |       |       |       |     | 0.96 | 71.76 |      |      |       |      |      |      |       |     |     |     |      |      |     |       |       |       |      | 100   | 62           |
| 4    | 7        | Cal + Qz           | 32.23 |       |       |       |     | 0.72 | 67.04 |      |      |       |      |      |      |       |     |     |     |      |      |     |       |       |       |      | 100   | 66           |
| 4    | 8        | Cal + Qz           | 3.86  |       |       |       |     | 0.96 | 95.18 |      |      |       |      |      |      |       |     |     |     |      |      |     |       |       |       |      | 100   | 55           |
| 4    | 9        | Feohy + Cal + Qz   | 9.57  |       | 1.09  | 39.26 |     | 1.29 | 48.79 |      |      |       |      |      |      |       |     |     |     |      |      |     |       |       |       |      | 100   | 63           |
| 4    | 10       | Cal + Qz           | 35.81 |       |       |       |     |      | 64.19 |      |      |       |      |      |      |       |     |     |     |      |      |     |       |       |       |      | 100   | 67           |
| 4    | 11       | Cal + Qz           | 9.17  |       |       |       |     |      | 90.83 |      |      |       |      |      |      |       |     |     |     |      |      |     |       |       |       |      | 100   | 57           |

Table S12.1: Scanning Electron Microscope (SEM) mineral chemical analyses (EDS) of SK5.

[illegible]



Table S12.1: Scanning Electron Microscope (SEM) mineral chemical analyses (EDS) of SK5.

| Site | Position | Mineral            | SiO2  | TiO2 | Al2O3 | FeO   | MnO | MgO   | CaO   | Na2O | K2O  | P2O5  | SO3   | F    | Cl    | Cr2O3 | CoO | CuO | ZnO  | ZrO2 | Ag2O | BaO | La2O3 | Ce2O3 | Nd2O3 | WO3 | Total | Actual Total |
|------|----------|--------------------|-------|------|-------|-------|-----|-------|-------|------|------|-------|-------|------|-------|-------|-----|-----|------|------|------|-----|-------|-------|-------|-----|-------|--------------|
| 6    | 7        | Ap + Qz            | 59.04 |      |       |       |     |       | 21.21 | 0.48 |      | 15.97 | 0.92  | 2.37 |       |       |     |     |      |      |      |     |       |       |       |     | 100   | 103          |
| 6    | 8        | Cal + Qz           | 4.23  |      |       |       |     | 0.71  | 95.06 |      |      |       |       |      |       |       |     |     |      |      |      |     |       |       |       |     | 100   | 56           |
| 6    | 9        | Feohy + Qz +       | 40.72 |      | 1.43  | 55.06 |     | 1.59  | 1.21  |      |      |       |       |      |       |       |     |     |      |      |      |     |       |       |       |     | 100   | 88           |
| 6    | 10       | Qz                 | 100   |      |       |       |     |       |       |      |      |       |       |      |       |       |     |     |      |      |      |     |       |       |       |     | 100   | 114          |
| 6    | 11       | Feohy + Qz+ Cal +  | 13.86 |      | 1.54  | 54.63 |     | 1.86  | 28.13 |      |      |       |       |      |       |       |     |     |      |      |      |     |       |       |       |     | 100   | 75           |
| 6    | 12       | Cal + Qz           | 19.91 |      |       |       |     |       | 80.09 |      |      |       |       |      |       |       |     |     |      |      |      |     |       |       |       |     | 100   | 62           |
| 6    | 13       | Cal + Qz           | 48.83 |      | 0.51  |       |     | 0.62  | 50.04 |      |      |       |       |      |       |       |     |     |      |      |      |     |       |       |       |     | 100   | 74           |
| 6    | 14       | Qz                 | 100   |      |       |       |     |       |       |      |      |       |       |      |       |       |     |     |      |      |      |     |       |       |       |     | 100   | 108          |
| 6    | 15       | Qz                 | 100   |      |       |       |     |       |       |      |      |       |       |      |       |       |     |     |      |      |      |     |       |       |       |     | 100   | 112          |
| 7    | 2        | Cal                | 1.25  |      |       |       |     |       | 98.75 |      |      |       |       |      |       |       |     |     |      |      |      |     |       |       |       |     | 100   | 50           |
| 7    | 3        | Feohy + Qz + Cal + | 11.92 |      | 1.87  | 81.17 |     | 2.73  | 2.31  |      |      |       |       |      |       |       |     |     |      |      |      |     |       |       |       |     | 100   | 68           |
| 7    | 4        | Cal                | 1.81  |      |       |       |     | 0.71  | 97.48 |      |      |       |       |      |       |       |     |     |      |      |      |     |       |       |       |     | 100   | 51           |
| 7    | 5        | Feohy + Qz + Cal + | 9.84  |      | 2.47  | 81.55 |     | 2.7   | 2.34  |      |      | 1.1   |       |      |       |       |     |     |      |      |      |     |       |       |       |     | 100   | 69           |
| 7    | 6        | Cal                |       |      |       |       |     | 56    |       |      |      |       |       |      |       |       |     |     |      |      |      |     |       |       |       |     | 56    | 51           |
| 7    | 7        | Feohy + Qz + Cal + | 26.74 |      | 1.56  | 67.45 |     | 2.4   | 1.86  |      |      |       |       |      |       |       |     |     |      |      |      |     |       |       |       |     | 100   | 74           |
| 7    | 8        | Cal + Qz           | 18.93 |      |       |       |     |       | 81.07 |      |      |       |       |      |       |       |     |     |      |      |      |     |       |       |       |     | 100   | 58           |
| 7    | 9        | Cal + Qz           | 25.71 |      |       |       |     |       | 74.29 |      |      |       |       |      |       |       |     |     |      |      |      |     |       |       |       |     | 100   | 60           |
| 7    | 10       | Qz                 | 99.04 |      |       |       |     |       | 0.96  |      |      |       |       |      |       |       |     |     |      |      |      |     |       |       |       |     | 100   | 106          |
| 7    | 11       | Qz                 | 99.08 |      |       |       |     |       | 0.92  |      |      |       |       |      |       |       |     |     |      |      |      |     |       |       |       |     | 100   | 106          |
| 7    | 12       | Qz                 | 100   |      |       |       |     |       |       |      |      |       |       |      |       |       |     |     |      |      |      |     |       |       |       |     | 100   | 107          |
| 7    | 13       | Cal + Qz           | 21.17 |      |       |       |     | 0.59  | 78.25 |      |      |       |       |      |       |       |     |     |      |      |      |     |       |       |       |     | 100   | 60           |
| 7    | 14       | Qz                 | 99.72 |      |       |       |     |       | 0.28  |      |      |       |       |      |       |       |     |     |      |      |      |     |       |       |       |     | 100   | 110          |
| 7    | 15       | Cal + Qz           | 14.88 |      |       |       |     |       | 85.12 |      |      |       |       |      |       |       |     |     |      |      |      |     |       |       |       |     | 100   | 57           |
| 7    | 16       | Qz                 | 99.51 |      |       |       |     |       | 0.49  |      |      |       |       |      |       |       |     |     |      |      |      |     |       |       |       |     | 100   | 112          |
| 7    | 17       | Cal                | 1.61  |      |       |       |     |       | 98.39 |      |      |       |       |      |       |       |     |     |      |      |      |     |       |       |       |     | 100   | 55           |
| 7    | 18       | Feohy + Qz + Cal + | 25.37 |      | 1.76  | 68.38 |     | 2.76  | 1.73  |      |      |       |       |      |       |       |     |     |      |      |      |     |       |       |       |     | 100   | 73           |
| 7    | 19       | Cal + Qz           | 25.36 |      | 0.83  |       |     |       | 73.81 |      |      |       |       |      |       |       |     |     |      |      |      |     |       |       |       |     | 100   | 64           |
| 7    | 20       | Feohy + Qz + Cal + | 8.97  | 0.49 | 1.98  | 76.24 |     | 2.32  | 9     |      |      | 0.99  |       |      |       |       |     |     |      |      |      |     |       |       |       |     | 100   | 72           |
| 7    | 21       | Cal + Qz           | 14.27 |      |       |       |     | 0.69  | 85.04 |      |      |       |       |      |       |       |     |     |      |      |      |     |       |       |       |     | 100   | 60           |
| 7    | 22       | Qz + Cal           | 97.97 |      |       |       |     |       | 2.03  |      |      |       |       |      |       |       |     |     |      |      |      |     |       |       |       |     | 100   | 107          |
| 7    | 23       | Cal                |       |      |       |       |     | 0.381 | 55.62 |      |      |       |       |      |       |       |     |     |      |      |      |     |       |       |       |     | 56    | 53           |
| 7    | 24       | Qz + Cal           | 65.5  |      |       |       |     |       | 34.5  |      |      |       |       |      |       |       |     |     |      |      |      |     |       |       |       |     | 100   | 72           |
| 8    | 1        | Feohy + Qz + Cal + | 8.96  |      | 1.89  | 83.33 |     | 2.83  | 1.96  |      |      | 1.04  |       |      |       |       |     |     |      |      |      |     |       |       |       |     | 100   | 73           |
| 8    | 2        | Cal + Feohy + Qz + | 4.75  |      | 1.28  | 43.68 |     | 1.39  | 48.89 |      |      |       |       |      |       |       |     |     |      |      |      |     |       |       |       |     | 100   | 58           |
| 8    | 3        | Hole               | 16.14 |      |       | 49.21 |     |       | 13.78 |      |      |       |       |      | 20.87 |       |     |     |      |      |      |     |       |       |       |     | 100   | 3            |
| 8    | 4        | Hole               | 41.41 |      | 4.19  | 5.36  |     | 10.22 | 18.89 | 3.65 | 0.77 |       | 11.89 |      |       |       |     |     | 3.62 |      |      |     |       |       |       |     | 100   | 30           |
| 8    | 5        | Feohy + Qz + Cal + | 8.37  |      | 1.43  | 85.62 |     | 2.96  | 1.62  |      |      |       |       |      |       |       |     |     |      |      |      |     |       |       |       |     | 100   | 73           |
| 8    | 6        | Qz + Cal           | 55.96 |      |       |       |     |       | 44.04 |      |      |       |       |      |       |       |     |     |      |      |      |     |       |       |       |     | 100   | 78           |
| 8    | 7        | Cal + Qz           | 39.71 |      |       | 0.68  |     |       | 59.61 |      |      |       |       |      |       |       |     |     |      |      |      |     |       |       |       |     | 100   | 62           |
| 8    | 8        | Cal                |       |      |       |       |     |       | 56    |      |      |       |       |      |       |       |     |     |      |      |      |     |       |       |       |     | 56    | 54           |
| 8    | 9        | Feohy + Qz + Cal + | 16.83 |      |       | 65.16 |     | 2.18  | 15.83 |      |      |       |       |      |       |       |     |     |      |      |      |     |       |       |       |     | 100   | 77           |
| 8    | 10       | Cal                |       |      |       |       |     | 0.353 | 55.65 |      |      |       |       |      |       |       |     |     |      |      |      |     |       |       |       |     | 56    | 56           |
| 8    | 11       | Feohy + Qz + Cal + | 8.6   |      | 1.67  | 82.61 |     |       | 3.06  | 4.06 |      |       |       |      |       |       |     |     |      |      |      |     |       |       |       |     | 100   | 76           |
| 8    | 12       | Cal                |       |      |       |       |     | 0.431 | 55.57 |      |      |       |       |      |       |       |     |     |      |      |      |     |       |       |       |     | 56    | 56           |
| 8    | 13       | Feohy + Qz + Cal   | 6.59  |      | 1.91  | 63.21 |     | 2.2   | 26.09 |      |      |       |       |      |       |       |     |     |      |      |      |     |       |       |       |     | 100   | 71           |
| 8    | 14       | Cal + Feohy + Qz   | 4.85  |      |       | 43.42 |     | 1.27  | 50.46 |      |      |       |       |      |       |       |     |     |      |      |      |     |       |       |       |     | 100   | 64           |
| 8    | 15       | Cal + Qz           | 4.07  |      |       |       |     |       | 95.93 |      |      |       |       |      |       |       |     |     |      |      |      |     |       |       |       |     | 100   | 56           |
| 8    | 16       | Cal + Qz           | 25.06 |      |       |       |     |       | 74.94 |      |      |       |       |      |       |       |     |     |      |      |      |     |       |       |       |     | 100   | 59           |
| 8    | 17       | Cal + Qz           | 17.85 | 1.25 |       | 6.47  |     |       | 74.44 |      |      |       |       |      |       |       |     |     |      |      |      |     |       |       |       |     | 100   | 54           |
| 8    | 18       | Ap                 |       |      |       |       |     |       | 53.45 | 1.32 |      | 35.41 | 1.72  | 7.64 | 0.46  |       |     |     |      |      |      |     |       |       |       |     | 100   | 68           |
| 8    | 19       | Cal                |       |      |       |       |     |       | 56    |      |      |       |       |      |       |       |     |     |      |      |      |     |       |       |       |     | 56    | 55           |
| 9    | 1        | Feohy + Cal + Qz + | 7.22  |      | 1.5   | 73.62 |     | 2.57  | 15.09 |      |      |       |       |      |       |       |     |     |      |      |      |     |       |       |       |     | 100   | 71           |
| 9    | 2        | Feohy + Qz + Cal + | 15.84 |      | 1.14  | 59.03 |     | 1.87  | 22.12 |      |      |       |       |      |       |       |     |     |      |      |      |     |       |       |       |     | 100   | 73           |
| 9    | 3        | Feohy + Qz + Cal + | 10.17 |      | 1.97  | 68.69 |     | 2.55  | 16.61 |      |      |       |       |      |       |       |     |     |      |      |      |     |       |       |       |     | 100   | 71           |
| 9    | 4        | Cal                |       |      |       |       |     |       | 56    |      |      |       |       |      |       |       |     |     |      |      |      |     |       |       |       |     | 56    | 53           |

Table S12.1: Scanning Electron Microscope (SEM) mineral chemical analyses (EDS) of SK5.

| Site | Position | Mineral            | SiO2  | TiO2 | Al2O3 | FeO   | MnO | MgO  | CaO   | Na2O | K2O  | P2O5  | SO3  | F     | Cl   | Cr2O3 | CoO | CuO | ZnO | ZrO2 | Ag2O | BaO | La2O3 | Ce2O3 | Nd2O3 | WO3 | Total | Actual Total |
|------|----------|--------------------|-------|------|-------|-------|-----|------|-------|------|------|-------|------|-------|------|-------|-----|-----|-----|------|------|-----|-------|-------|-------|-----|-------|--------------|
| 9    | 5        | Cal + Qz           | 6.26  |      |       |       |     |      | 93.74 |      |      |       |      |       |      |       |     |     |     |      |      |     |       |       |       |     | 100   | 56           |
| 9    | 6        | Cal                |       |      |       |       |     | 0.65 | 55.35 |      |      |       |      |       |      |       |     |     |     |      |      |     |       |       |       |     | 56    | 53           |
| 9    | 7        | Qz + Cal           | 96.16 |      |       |       |     |      | 3.84  |      |      |       |      |       |      |       |     |     |     |      |      |     |       |       |       |     | 100   | 102          |
| 9    | 8        | Cal + Qz           | 4.76  |      |       |       |     |      | 94.82 |      |      |       |      |       | 0.42 |       |     |     |     |      |      |     |       |       |       |     | 100   | 41           |
| 9    | 9        | Cal                | 1.62  |      |       |       |     |      | 98.38 |      |      |       |      |       |      |       |     |     |     |      |      |     |       |       |       |     | 100   | 44           |
| 9    | 10       | Cal + Qz           | 4.75  |      |       |       |     |      | 95.25 |      |      |       |      |       |      |       |     |     |     |      |      |     |       |       |       |     | 100   | 42           |
| 9    | 11       | Qz + Cal           | 68.37 |      |       |       |     |      | 31.63 |      |      |       |      |       |      |       |     |     |     |      |      |     |       |       |       |     | 100   | 72           |
| 10   | 1        | Qz                 | 99.54 |      |       |       |     |      | 0.46  |      |      |       |      |       |      |       |     |     |     |      |      |     |       |       |       |     | 100   | 109          |
| 10   | 2        | Cal + Qz           | 12    |      |       |       |     |      | 88    |      |      |       |      |       |      |       |     |     |     |      |      |     |       |       |       |     | 100   | 56           |
| 10   | 3        | Cal                |       |      |       |       |     |      | 56    |      |      |       |      |       |      |       |     |     |     |      |      |     |       |       |       |     | 56    | 52           |
| 10   | 4        | Cal                |       |      |       |       |     |      | 56    |      |      |       |      |       |      |       |     |     |     |      |      |     |       |       |       |     | 56    | 52           |
| 10   | 5        | Cal                | 0.94  |      |       |       |     | 0.7  | 98.36 |      |      |       |      |       |      |       |     |     |     |      |      |     |       |       |       |     | 100   | 54           |
| 10   | 6        | Mnz (Ce) +         | 1.55  |      |       |       |     |      | 5.83  |      |      | 33.69 |      | -0.52 |      |       |     |     |     |      | 1.49 |     | 16.33 | 31.47 | 10.16 |     | 100   | 98           |
| 10   | 7        | Cal + Qz           | 9.38  |      |       |       |     |      | 90.62 |      |      |       |      |       |      |       |     |     |     |      |      |     |       |       |       |     | 100   | 49           |
| 10   | 8        | Gth + Qz           | 19.8  | 0.63 | 3.36  | 70.81 |     | 2.31 | 2.57  |      | 0.52 |       |      |       |      |       |     |     |     |      |      |     |       |       |       |     | 100   | 79           |
| 10   | 9        | Cal                | 2.08  |      |       | 1.92  |     |      | 95.99 |      |      |       |      |       |      |       |     |     |     |      |      |     |       |       |       |     | 100   | 56           |
| 10   | 10       | Gth + Qz           | 35.62 | 0.61 | 7.17  | 50.7  |     | 2    | 1.93  |      | 1.97 |       |      |       |      |       |     |     |     |      |      |     |       |       |       |     | 100   | 87           |
| 10   | 11       | Gth + Qz           | 24.38 |      | 3.8   | 57.19 |     | 1.91 | 11.93 |      | 0.78 |       |      |       |      |       |     |     |     |      |      |     |       |       |       |     | 100   | 80           |
| 10   | 12       | Feohy + Qz + Cal + | 26.46 |      | 2.73  | 65.09 |     | 2.3  | 2.15  | 0.73 | 0.53 |       |      |       |      |       |     |     |     |      |      |     |       |       |       |     | 100   | 81           |
| 10   | 13       | Cal                | 2.05  |      |       |       |     |      | 97.95 |      |      |       |      |       |      |       |     |     |     |      |      |     |       |       |       |     | 100   | 55           |
| 10   | 14       | Feohy + Qz + Cal   | 27.36 |      | 0.72  | 26.93 |     | 0.97 | 44.03 |      |      |       |      |       |      |       |     |     |     |      |      |     |       |       |       |     | 100   | 68           |
| 10   | 15       | Qz + Cal           | 95.92 |      |       |       |     |      | 4.08  |      |      |       |      |       |      |       |     |     |     |      |      |     |       |       |       |     | 100   | 105          |
| 10   | 16       | Qz                 | 99.33 |      |       |       |     |      | 0.67  |      |      |       |      |       |      |       |     |     |     |      |      |     |       |       |       |     | 100   | 111          |
| 10   | 17       | Cal                | 1.72  |      |       |       |     |      | 98.28 |      |      |       |      |       |      |       |     |     |     |      |      |     |       |       |       |     | 100   | 53           |
| 11   | 1        | Cal + Qz           | 13.39 |      | 0.76  |       |     |      | 85.85 |      |      |       |      |       |      |       |     |     |     |      |      |     |       |       |       |     | 100   | 56           |
| 11   | 2        | Qz                 | 99.26 |      |       |       |     |      | 0.74  |      |      |       |      |       |      |       |     |     |     |      |      |     |       |       |       |     | 100   | 108          |
| 11   | 3        | Feohy + Qz + Cal + | 9.06  | 0.51 | 1.77  | 81.21 |     | 2.27 | 5.18  |      |      |       |      |       |      |       |     |     |     |      |      |     |       |       |       |     | 100   | 65           |
| 11   | 4        | Feohy + Qz + Cal + | 34.18 |      | 1.29  | 49.47 |     | 1.65 | 13.4  |      |      |       |      |       |      |       |     |     |     |      |      |     |       |       |       |     | 100   | 72           |
| 11   | 5        | Cal + Qz           | 21.46 |      |       |       |     | 0.87 | 77.66 |      |      |       |      |       |      |       |     |     |     |      |      |     |       |       |       |     | 100   | 61           |
| 11   | 6        | Cal + Qz           | 1.27  |      |       |       |     | 1.23 | 97.5  |      |      |       |      |       |      |       |     |     |     |      |      |     |       |       |       |     | 100   | 54           |
| 11   | 7        | Cal + Qz           | 22.45 |      |       |       |     |      | 77.55 |      |      |       |      |       |      |       |     |     |     |      |      |     |       |       |       |     | 100   | 62           |
| 11   | 8        | Cal                | 1.65  |      |       |       |     | 1.29 | 97.06 |      |      |       |      |       |      |       |     |     |     |      |      |     |       |       |       |     | 100   | 54           |
| 11   | 9        | Cal                | 1.09  |      |       |       |     | 1.02 | 97.89 |      |      |       |      |       |      |       |     |     |     |      |      |     |       |       |       |     | 100   | 55           |
| 11   | 10       | Qz                 | 100   |      |       |       |     |      |       |      |      |       |      |       |      |       |     |     |     |      |      |     |       |       |       |     | 100   | 113          |
| 11   | 11       | Cal                | 1.55  |      |       |       |     | 1.08 | 97.37 |      |      |       |      |       |      |       |     |     |     |      |      |     |       |       |       |     | 100   | 56           |
| 11   | 12       | Qz                 | 100   |      |       |       |     |      |       |      |      |       |      |       |      |       |     |     |     |      |      |     |       |       |       |     | 100   | 113          |
| 11   | 13       | Cal + Qz           | 41.68 |      |       |       |     |      | 58.32 |      |      |       |      |       |      |       |     |     |     |      |      |     |       |       |       |     | 100   | 71           |
| 11   | 14       | Cal                | 2.1   |      |       |       |     | 0.65 | 97.24 |      |      |       |      |       |      |       |     |     |     |      |      |     |       |       |       |     | 100   | 54           |
| 11   | 15       | Feohy + Qz + Cal + | 22.36 |      | 1.94  | 70.62 |     | 2.49 | 2.31  |      |      |       |      |       | 0.28 |       |     |     |     |      |      |     |       |       |       |     | 100   | 81           |
| 11   | 16       | Cal                | 1.09  |      |       |       |     | 1.24 | 97.66 |      |      |       |      |       |      |       |     |     |     |      |      |     |       |       |       |     | 100   | 53           |
| 11   | 17       | Qz                 | 99.69 |      |       |       |     |      | 0.31  |      |      |       |      |       |      |       |     |     |     |      |      |     |       |       |       |     | 100   | 111          |
| 12   | 1        | Feohy + Qz + Cal + | 12.05 |      | 1.71  | 68.53 |     | 2.42 | 15.29 |      |      |       |      |       |      |       |     |     |     |      |      |     |       |       |       |     | 100   | 69           |
| 12   | 2        | Feohy + Qz + Cal + | 7.12  |      | 1.4   | 53.11 |     | 1.68 | 36.68 |      |      |       |      |       |      |       |     |     |     |      |      |     |       |       |       |     | 100   | 65           |
| 12   | 3        | Cal + Qz           | 12.47 |      |       |       |     |      | 87.53 |      |      |       |      |       |      |       |     |     |     |      |      |     |       |       |       |     | 100   | 56           |
| 12   | 4        | Feohy + Qz + Cal + | 16.47 |      | 1.46  | 54.82 |     | 1.56 | 25.7  |      |      |       |      |       |      |       |     |     |     |      |      |     |       |       |       |     | 100   | 71           |
| 12   | 5        | Cal                | 1.8   |      |       | 1.71  |     |      | 96.49 |      |      |       |      |       |      |       |     |     |     |      |      |     |       |       |       |     | 100   | 51           |
| 12   | 6        | Cal                |       |      |       |       |     |      | 56    |      |      |       |      |       |      |       |     |     |     |      |      |     |       |       |       |     | 56    | 50           |
| 12   | 7        | Cal                |       |      |       |       |     |      | 56    |      |      |       |      |       |      |       |     |     |     |      |      |     |       |       |       |     | 56    | 52           |
| 12   | 8        | Cal + Qz           | 4.65  |      |       | 4.4   |     | 0.88 | 90.06 |      |      |       |      |       |      |       |     |     |     |      |      |     |       |       |       |     | 100   | 52           |
| 12   | 9        | Cal + Feohy + Qz   | 3.16  |      |       | 20.97 |     | 1.07 | 74.81 |      |      |       |      |       |      |       |     |     |     |      |      |     |       |       |       |     | 100   | 56           |
| 12   | 10       | Cal + Qz           | 3.82  |      | 1     |       |     | 0.78 | 94.4  |      |      |       |      |       |      |       |     |     |     |      |      |     |       |       |       |     | 100   | 55           |
| 12   | 11       | Ap + Qz            | 1.8   |      |       |       |     |      | 50.92 | 1.12 |      | 38.17 | 1.57 | 5.62  | 0.8  |       |     |     |     |      |      |     |       |       |       |     | 100   | 49           |
| 12   | 12       | Qz + Cal           | 89.72 |      | 0.82  |       |     |      | 9.24  |      | 0.22 |       |      |       |      |       |     |     |     |      |      |     |       |       |       |     | 100   | 99           |
| 12   | 13       | Qz + Cal           | 91.42 |      | 0.91  |       |     |      | 7.67  |      |      |       |      |       |      |       |     |     |     |      |      |     |       |       |       |     | 100   | 98           |
| 13   | 1        | Cal                |       |      |       |       |     |      | 56    |      |      |       |      |       |      |       |     |     |     |      |      |     |       |       |       |     | 56    | 50           |

Table S12.1: Scanning Electron Microscope (SEM) mineral chemical analyses (EDS) of SK5.

| Site | Position | Mineral            | SiO2  | TiO2  | Al2O3 | FeO   | MnO  | MgO  | CaO   | Na2O | K2O  | P2O5  | SO3  | F    | Cl   | Cr2O3 | CoO | CuO | ZnO | ZrO2 | Ag2O | BaO | La2O3 | Ce2O3 | Nd2O3 | WO3 | Total | Actual Total |
|------|----------|--------------------|-------|-------|-------|-------|------|------|-------|------|------|-------|------|------|------|-------|-----|-----|-----|------|------|-----|-------|-------|-------|-----|-------|--------------|
| 13   | 2        | Feohy + Cal + Qz + | 15.84 |       | 3.24  | 64.02 |      | 2.14 | 14.44 |      | 0.33 |       |      |      |      |       |     |     |     |      |      |     |       |       |       |     | 100   | 71           |
| 13   | 3        | Feohy + Cal + Qz + | 10.25 |       | 2.44  | 66.31 |      | 2.32 | 18.68 |      |      |       |      |      |      |       |     |     |     |      |      |     |       |       |       |     | 100   | 67           |
| 13   | 4        | Feohy + Cal + Qz + | 8.31  |       | 1.86  | 67.66 |      | 2.09 | 20.08 |      |      |       |      |      |      |       |     |     |     |      |      |     |       |       |       |     | 100   | 66           |
| 13   | 5        | Feohy + Cal + Qz + | 7.79  |       | 2.1   | 58.33 |      | 2.1  | 29.69 |      |      |       |      |      |      |       |     |     |     |      |      |     |       |       |       |     | 100   | 64           |
| 13   | 6        | Feohy + Cal + Qz + | 7.13  |       | 1.46  | 64.48 |      | 2.37 | 24.56 |      |      |       |      |      |      |       |     |     |     |      |      |     |       |       |       |     | 100   | 65           |
| 13   | 7        | Feohy + Cal + Qz + | 8.4   |       | 1.62  | 54.28 |      | 1.88 | 33.82 |      |      |       |      |      |      |       |     |     |     |      |      |     |       |       |       |     | 100   | 64           |
| 13   | 8        | Feohy + Cal + Qz + | 7.5   |       | 1.69  | 70.64 |      | 2.27 | 17.9  |      |      |       |      |      |      |       |     |     |     |      |      |     |       |       |       |     | 100   | 68           |
| 13   | 9        | Feohy + Cal + Qz + | 5.54  |       | 1.58  | 43.66 |      | 2.04 | 47.19 |      |      |       |      |      |      |       |     |     |     |      |      |     |       |       |       |     | 100   | 63           |
| 13   | 10       | Cal                | 1.7   |       |       | 2.77  |      |      | 95.54 |      |      |       |      |      |      |       |     |     |     |      |      |     |       |       |       |     | 100   | 53           |
| 13   | 11       | Feohy + Cal + Qz + | 8.57  |       | 3.89  | 67.56 |      | 2.93 | 17.05 |      |      |       |      |      |      |       |     |     |     |      |      |     |       |       |       |     | 100   | 69           |
| 13   | 12       | Feohy + Cal + Qz + | 8.83  |       | 2.36  | 73.87 |      | 2.4  | 12.54 |      |      |       |      |      |      |       |     |     |     |      |      |     |       |       |       |     | 100   | 70           |
| 13   | 13       | Feohy + Cal + Qz + | 8.04  |       | 1.99  | 72.83 |      | 2.55 | 13.87 | 0.72 |      |       |      |      |      |       |     |     |     |      |      |     |       |       |       |     | 100   | 71           |
| 13   | 14       | Feohy + Cal + Qz + | 4.94  |       | 1.16  | 43.06 |      | 1.63 | 49.21 |      |      |       |      |      |      |       |     |     |     |      |      |     |       |       |       |     | 100   | 62           |
| 13   | 15       | Cal                | 1.78  |       |       | 0.96  |      |      | 96.49 |      |      |       | 0.76 |      |      |       |     |     |     |      |      |     |       |       |       |     | 100   | 55           |
| 13   | 16       | Feohy + Cal + Qz + | 6.04  |       | 1.43  | 59.15 |      | 1.9  | 31.48 |      |      |       |      |      |      |       |     |     |     |      |      |     |       |       |       |     | 100   | 64           |
| 13   | 17       | Feohy + Cal + Qz + | 6.46  |       | 1.79  | 55.46 |      | 2.3  | 34    |      |      |       |      |      |      |       |     |     |     |      |      |     |       |       |       |     | 100   | 71           |
| 13   | 18       | Feohy + Cal + Qz + | 7.92  | 0.65  | 2.6   | 73.82 |      | 2.49 | 12.52 |      |      |       |      |      |      |       |     |     |     |      |      |     |       |       |       |     | 100   | 69           |
| 13   | 19       | Cal + Qz           | 2.76  |       |       |       |      |      | 97.24 |      |      |       |      |      |      |       |     |     |     |      |      |     |       |       |       |     | 100   | 55           |
| 13   | 20       | Feohy + Cal + Qz + | 6.73  |       | 1.99  | 65.97 |      | 2.16 | 23.15 |      |      |       |      |      |      |       |     |     |     |      |      |     |       |       |       |     | 100   | 64           |
| 13   | 21       | Feohy + Cal + Qz + | 30.17 |       | 1.71  | 58.03 |      | 2.69 | 7.39  |      |      |       |      |      |      |       |     |     |     |      |      |     |       |       |       |     | 100   | 80           |
| 13   | 22       | Ap                 | 1.02  |       |       |       |      | 0.57 | 48.36 | 1.15 |      | 39.67 | 1.95 | 6.74 | 0.54 |       |     |     |     |      |      |     |       |       |       |     | 100   | 67           |
| 13   | 23       | Feohy + Cal + Qz + | 7.91  | 0.58  | 2.85  | 72.2  |      | 2.94 | 13.52 |      |      |       |      |      |      |       |     |     |     |      |      |     |       |       |       |     | 100   | 68           |
| 13   | 24       | Feohy + Cal + Qz + | 7.23  |       | 2.09  | 66.68 |      | 2.59 | 21.41 |      |      |       |      |      |      |       |     |     |     |      |      |     |       |       |       |     | 100   | 66           |
| 13   | 25       | Feohy + Cal + Qz + | 7.1   |       | 1.92  | 58.74 |      | 2.27 | 29.97 |      |      |       |      |      |      |       |     |     |     |      |      |     |       |       |       |     | 100   | 70           |
| 13   | 26       | Feohy + Cal + Qz + | 13.36 | 0.56  | 2.43  | 67.46 |      | 2.41 | 13.77 |      |      |       |      |      |      |       |     |     |     |      |      |     |       |       |       |     | 100   | 71           |
| 13   | 27       | Feohy + Cal + Qz + | 36.21 |       | 1.9   | 54.87 |      | 1.65 | 5.37  |      |      |       |      |      |      |       |     |     |     |      |      |     |       |       |       |     | 100   | 78           |
| 13   | 28       | Cal + Qz           | 2.3   |       |       |       |      | 0.9  | 96.8  |      |      |       |      |      |      |       |     |     |     |      |      |     |       |       |       |     | 100   | 53           |
| 13   | 29       | Feohy + Cal + Qz   | 8.85  | 0.65  |       | 68.54 |      | 2.33 | 19.63 |      |      |       |      |      |      |       |     |     |     |      |      |     |       |       |       |     | 100   | 67           |
| 13   | 30       | Cal                |       |       |       |       |      |      | 56    |      |      |       |      |      |      |       |     |     |     |      |      |     |       |       |       |     | 56    | 52           |
| 13   | 31       | Feohy + Cal + Qz + | 7.59  |       | 1.27  | 84.24 |      | 2.38 | 3.82  |      |      |       |      | 0.69 |      |       |     |     |     |      |      |     |       |       |       |     | 100   | 40           |
| 13   | 32       | Feohy + Cal + Qz   | 6.76  |       |       | 57.16 |      | 1.96 | 34.11 |      |      |       |      |      |      |       |     |     |     |      |      |     |       |       |       |     | 100   | 64           |
| 13   | 33       | Cal + Qz           | 2.48  |       |       |       |      |      | 97.52 |      |      |       |      |      |      |       |     |     |     |      |      |     |       |       |       |     | 100   | 48           |
| 13   | 34       | Qz + Cal           | 97.62 |       |       |       |      |      | 2.38  |      |      |       |      |      |      |       |     |     |     |      |      |     |       |       |       |     | 100   | 101          |
| 13   | 35       | Feohy + Cal + Qz + | 7.84  | 0.66  | 2.03  | 72.14 |      | 2.51 | 14.81 |      |      |       |      |      |      |       |     |     |     |      |      |     |       |       |       |     | 100   | 65           |
| 13   | 36       | Cal + Qz           | 2.9   |       |       |       |      |      | 97.1  |      |      |       |      |      |      |       |     |     |     |      |      |     |       |       |       |     | 100   | 54           |
| 13   | 37       | Cal + Qz           | 3.48  |       |       | 0.65  |      |      | 95.87 |      |      |       |      |      |      |       |     |     |     |      |      |     |       |       |       |     | 100   | 49           |
| 14   | 1        | Feohy + Cal + Qz   | 11.58 |       |       | 72.8  |      | 3.29 | 12.34 |      |      |       |      |      |      |       |     |     |     |      |      |     |       |       |       |     | 100   | 52           |
| 14   | 2        | Feohy + Qz + Cal + | 34.6  | 0.52  | 1.52  | 55.91 |      | 1.64 | 5.81  |      |      |       |      |      |      |       |     |     |     |      |      |     |       |       |       |     | 100   | 63           |
| 14   | 3        | Cal + Qz           | 26.13 |       |       |       |      |      | 73.87 |      |      |       |      |      |      |       |     |     |     |      |      |     |       |       |       |     | 100   | 60           |
| 14   | 4        | Cal                | 1.71  |       |       |       |      |      | 98.29 |      |      |       |      |      |      |       |     |     |     |      |      |     |       |       |       |     | 100   | 51           |
| 14   | 5        | Qz + Cal           | 80.31 |       |       |       |      |      | 19.69 |      |      |       |      |      |      |       |     |     |     |      |      |     |       |       |       |     | 100   | 90           |
| 14   | 6        | Qz + Cal           | 98.37 |       |       |       |      |      | 1.63  |      |      |       |      |      |      |       |     |     |     |      |      |     |       |       |       |     | 100   | 107          |
| 14   | 7        | Cal + Qz           | 16.9  |       |       |       |      |      | 83.1  |      |      |       |      |      |      |       |     |     |     |      |      |     |       |       |       |     | 100   | 57           |
| 14   | 8        | Cal + Qz           | 2.75  |       |       |       |      |      | 97.25 |      |      |       |      |      |      |       |     |     |     |      |      |     |       |       |       |     | 100   | 53           |
| 14   | 9        | Ilm + Qz           | 41.95 | 33.64 |       | 22.86 | 0.58 | 0.43 | 0.54  |      |      |       |      |      |      |       |     |     |     |      |      |     |       |       |       |     | 100   | 96           |
| 14   | 10       | Ap + Qz            | 16.59 |       |       |       |      | 0.36 | 40.61 | 0.85 |      | 34.43 | 1.65 | 5.24 | 0.28 |       |     |     |     |      |      |     |       |       |       |     | 100   | 100          |
| 14   | 11       | Cal + Qz           | 2.55  |       |       |       |      | 1.05 | 96.07 |      |      |       |      |      | 0.33 |       |     |     |     |      |      |     |       |       |       |     | 100   | 52           |
| 14   | 12       | Qz                 | 99.77 |       |       |       |      |      | 0.23  |      |      |       |      |      |      |       |     |     |     |      |      |     |       |       |       |     | 100   | 109          |
| 14   | 13       | Cal + Qz           | 23.15 |       |       |       |      |      | 76.85 |      |      |       |      |      |      |       |     |     |     |      |      |     |       |       |       |     | 100   | 63           |
| 14   | 14       | Cal + Qz           | 25.47 |       |       |       |      |      | 74.53 |      |      |       |      |      |      |       |     |     |     |      |      |     |       |       |       |     | 100   | 62           |
| 14   | 15       | Cal + Qz           | 10.08 |       |       |       |      | 0.62 | 89.3  |      |      |       |      |      |      |       |     |     |     |      |      |     |       |       |       |     | 100   | 57           |
| 14   | 16       | Cal + Qz           | 48.32 |       |       |       |      | 0.47 | 51.22 |      |      |       |      |      |      |       |     |     |     |      |      |     |       |       |       |     | 100   | 75           |
| 14   | 17       | Cal + Qz           | 14.41 |       |       |       |      |      | 85.59 |      |      |       |      |      |      |       |     |     |     |      |      |     |       |       |       |     | 100   | 58           |
| 14   | 18       | Qz + TiO2          | 74.35 | 14.7  |       | 10.7  |      |      | 0.25  |      |      |       |      |      |      |       |     |     |     |      |      |     |       |       |       |     | 100   | 106          |
| 14   | 19       | Cal + Qz           | 14.58 |       |       | 0.65  |      | 0.94 | 83.82 |      |      |       |      |      |      |       |     |     |     |      |      |     |       |       |       |     | 100   | 60           |

Table S12.1: Scanning Electron Microscope (SEM) mineral chemical analyses (EDS) of SK5.

| Site | Position | Mineral            | SiO2  | TiO2  | Al2O3 | FeO   | MnO | MgO  | CaO   | Na2O | K2O  | P2O5  | SO3   | F    | Cl   | Cr2O3 | CoO | CuO | ZnO | ZrO2  | Ag2O | BaO | La2O3 | Ce2O3 | Nd2O3 | WO3 | Total | Actual Total |
|------|----------|--------------------|-------|-------|-------|-------|-----|------|-------|------|------|-------|-------|------|------|-------|-----|-----|-----|-------|------|-----|-------|-------|-------|-----|-------|--------------|
| 14   | 20       | Qz + Cal           | 56.81 |       |       |       |     | 0.53 | 42.66 |      |      |       |       |      |      |       |     |     |     |       |      |     |       |       |       |     | 100   | 81           |
| 14   | 21       | Ap + Qz            | 2.43  |       |       |       |     | 0.48 | 48.7  | 0.93 |      | 40.07 | 2.01  | 5.1  | 0.3  |       |     |     |     |       |      |     |       |       |       |     | 100   | 100          |
| 14   | 22       | Cal + Qz           | 41.75 |       |       |       |     |      | 58.25 |      |      |       |       |      |      |       |     |     |     |       |      |     |       |       |       |     | 100   | 69           |
| 14   | 23       | Cal + Qz           | 8.85  |       |       |       |     | 0.64 | 90.51 |      |      |       |       |      |      |       |     |     |     |       |      |     |       |       |       |     | 100   | 55           |
| 14   | 24       | Feohy + Qz + Cal + | 27.29 |       | 1.58  | 57.04 |     | 2.06 | 12.03 |      |      |       |       |      |      |       |     |     |     |       |      |     |       |       |       |     | 100   | 74           |
| 14   | 25       | Feohy + Qz + Cal + | 39.19 |       |       | 41.85 |     | 1.46 | 17.5  |      |      |       |       |      |      |       |     |     |     |       |      |     |       |       |       |     | 100   | 79           |
| 14   | 26       | Cal + Qz           | 14.71 |       |       |       |     |      | 85.29 |      |      |       |       |      |      |       |     |     |     |       |      |     |       |       |       |     | 100   | 55           |
| 14   | 27       | Cal + Qz           | 14.98 |       |       |       |     | 0.68 | 84.34 |      |      |       |       |      |      |       |     |     |     |       |      |     |       |       |       |     | 100   | 56           |
| 14   | 28       | Cal                | 0.622 |       |       |       |     |      | 55.38 |      |      |       |       |      |      |       |     |     |     |       |      |     |       |       |       |     | 56    | 52           |
| 14   | 29       | Feohy + Cal + Qz + | 24.89 | 1.66  | 1.83  | 31.69 |     | 1.84 | 37.78 |      | 0.32 |       |       |      |      |       |     |     |     |       |      |     |       |       |       |     | 100   | 72           |
| 14   | 30       | Ap + Qz            | 3.89  |       |       |       |     | 0.78 | 49.54 | 0.9  |      | 36.4  | 1.97  | 6.26 | 0.27 |       |     |     |     |       |      |     |       |       |       |     | 100   | 90           |
| 14   | 31       | Cal + Qz           | 27.92 |       |       |       |     |      | 72.08 |      |      |       |       |      |      |       |     |     |     |       |      |     |       |       |       |     | 100   | 61           |
| 14   | 32       | Cal + Qz           | 6.29  |       |       |       |     |      | 93.71 |      |      |       |       |      |      |       |     |     |     |       |      |     |       |       |       |     | 100   | 53           |
| 14   | 33       | Qz + Cal           | 95.27 |       |       |       |     |      | 4.73  |      |      |       |       |      |      |       |     |     |     |       |      |     |       |       |       |     | 100   | 97           |
| 14   | 34       | Qz                 | 100   |       |       |       |     |      |       |      |      |       |       |      |      |       |     |     |     |       |      |     |       |       |       |     | 100   | 111          |
| 14   | 35       | Qz                 | 100   |       |       |       |     |      |       |      |      |       |       |      |      |       |     |     |     |       |      |     |       |       |       |     | 100   | 110          |
| 14   | 36       | Cal + Qz           | 14.53 |       |       |       |     |      | 85.47 |      |      |       |       |      |      |       |     |     |     |       |      |     |       |       |       |     | 100   | 51           |
| 15   | 1        | Qz                 | 99.42 |       | 0.58  |       |     |      |       |      |      |       |       |      |      |       |     |     |     |       |      |     |       |       |       |     | 100   | 103          |
| 15   | 2        | Cal + Qz           | 12.59 |       |       |       |     | 0.84 | 86.57 |      |      |       |       |      |      |       |     |     |     |       |      |     |       |       |       |     | 100   | 55           |
| 15   | 3        | Qz + Cal           | 97.87 |       |       |       |     |      | 2.13  |      |      |       |       |      |      |       |     |     |     |       |      |     |       |       |       |     | 100   | 101          |
| 15   | 4        | Qz                 | 100   |       |       |       |     |      |       |      |      |       |       |      |      |       |     |     |     |       |      |     |       |       |       |     | 100   | 105          |
| 15   | 5        | Cal + Qz           | 15.29 |       |       |       |     |      | 84.71 |      |      |       |       |      |      |       |     |     |     |       |      |     |       |       |       |     | 100   | 58           |
| 15   | 6        | Cal + Qz           | 7.25  |       |       |       |     |      | 92.75 |      |      |       |       |      |      |       |     |     |     |       |      |     |       |       |       |     | 100   | 55           |
| 15   | 7        | Cal + Qz           | 43.13 |       |       |       |     | 0.51 | 56.35 |      |      |       |       |      |      |       |     |     |     |       |      |     |       |       |       |     | 100   | 68           |
| 15   | 8        | Feohy + Qz + Cal + | 14.58 |       | 1.89  | 67.79 |     | 2.18 | 13.27 |      |      |       |       |      | 0.28 |       |     |     |     |       |      |     |       |       |       |     | 100   | 74           |
| 15   | 9        | Feohy + Qz + Cal + | 25.74 |       | 0.96  | 35.88 |     | 1.42 | 36.01 |      |      |       |       |      |      |       |     |     |     |       |      |     |       |       |       |     | 100   | 71           |
| 15   | 10       | Zrn + Qz           | 81.76 |       |       |       |     |      | 0.28  |      |      |       |       |      |      |       |     |     |     | 17.96 |      |     |       |       |       |     | 100   | 99           |
| 15   | 11       | Feohy + Qz +       | 79.35 |       | 1.54  | 18.45 |     | 0.66 |       |      |      |       |       |      |      |       |     |     |     |       |      |     |       |       |       |     | 100   | 101          |
| 15   | 12       | Cal + Qz           | 5.35  |       |       |       | 0.8 | 1    | 92.85 |      |      |       |       |      |      |       |     |     |     |       |      |     |       |       |       |     | 100   | 55           |
| 15   | 13       | Py + Qz            | 1.36  |       |       | 27.62 |     | 0.25 | 0.21  |      |      |       | 70.57 |      |      |       |     |     |     |       |      |     |       |       |       |     | 100   | 215          |
| 15   | 14       | Qz +               | 98.75 |       | 1.02  |       |     |      |       |      | 0.23 |       |       |      |      |       |     |     |     |       |      |     |       |       |       |     | 100   | 108          |
| 16   | 1        | Qz                 | 100   |       |       |       |     |      |       |      |      |       |       |      |      |       |     |     |     |       |      |     |       |       |       |     | 100   | 106          |
| 16   | 2        | Qz                 | 100   |       |       |       |     |      |       |      |      |       |       |      |      |       |     |     |     |       |      |     |       |       |       |     | 100   | 101          |
| 16   | 3        | Cal + Qz           | 23.1  |       |       |       |     |      | 76.9  |      |      |       |       |      |      |       |     |     |     |       |      |     |       |       |       |     | 100   | 59           |
| 16   | 4        | Qz                 | 99.64 |       |       |       |     |      | 0.36  |      |      |       |       |      |      |       |     |     |     |       |      |     |       |       |       |     | 100   | 109          |
| 16   | 5        | Qz + Cal           | 92.52 |       | 0.6   | 1.71  |     |      | 4.69  |      |      |       |       |      | 0.49 |       |     |     |     |       |      |     |       |       |       |     | 100   | 60           |
| 16   | 6        | Qz + Cal           | 95.73 |       |       |       |     |      | 4.27  |      |      |       |       |      |      |       |     |     |     |       |      |     |       |       |       |     | 100   | 103          |
| 16   | 7        | Qz + Cal           | 16.54 |       |       | 0.56  |     |      | 82.9  |      |      |       |       |      |      |       |     |     |     |       |      |     |       |       |       |     | 100   | 58           |
| 16   | 8        | Qz + Cal           | 51.09 |       |       |       |     |      | 48.91 |      |      |       |       |      |      |       |     |     |     |       |      |     |       |       |       |     | 100   | 77           |
| 16   | 9        | Cal +              | 12.17 |       |       |       |     | 0.83 | 87.01 |      |      |       |       |      |      |       |     |     |     |       |      |     |       |       |       |     | 100   | 58           |
| 16   | 10       | Ap + Qz            | 5.13  |       |       |       |     |      | 52.94 | 0.84 |      | 34.3  | 1.56  | 5    | 0.22 |       |     |     |     |       |      |     |       |       |       |     | 100   | 90           |
| 16   | 11       | Qz                 | 99.23 |       |       |       |     |      | 0.47  | 0.3  |      |       |       |      |      |       |     |     |     |       |      |     |       |       |       |     | 100   | 113          |
| 16   | 12       | Qz +               | 98.66 |       | 1.05  |       |     |      |       |      | 0.3  |       |       |      |      |       |     |     |     |       |      |     |       |       |       |     | 100   | 112          |
| 16   | 13       | TiO2 + Qz          | 45.31 | 52.71 | 0.52  | 0.76  |     |      | 0.7   |      |      |       |       |      |      |       |     |     |     |       |      |     |       |       |       |     | 100   | 105          |
| 16   | 14       | Cal + Qz           | 42.65 |       |       |       |     |      | 57.35 |      |      |       |       |      |      |       |     |     |     |       |      |     |       |       |       |     | 100   | 71           |
| 16   | 15       | Qz                 | 100   |       |       |       |     |      |       |      |      |       |       |      |      |       |     |     |     |       |      |     |       |       |       |     | 100   | 107          |
| 16   | 16       | Qz                 | 99.59 |       |       |       |     |      | 0.41  |      |      |       |       |      |      |       |     |     |     |       |      |     |       |       |       |     | 100   | 94           |
| 16   | 17       | Qz                 | 99.74 |       |       |       |     |      | 0.26  |      |      |       |       |      |      |       |     |     |     |       |      |     |       |       |       |     | 100   | 86           |
| 16   | 18       | Qz                 | 98.45 |       | 0.91  |       |     |      | 0.42  |      | 0.23 |       |       |      |      |       |     |     |     |       |      |     |       |       |       |     | 100   | 84           |
| 16   | 19       | Py + Cal + Qz      | 4.58  |       |       | 15.47 |     |      | 44.9  |      |      |       | 35.06 |      |      |       |     |     |     |       |      |     |       |       |       |     | 100   | 88           |
| 16   | 20       | Cal + Qz           | 31.21 |       |       |       |     | 0.55 | 68.24 |      |      |       |       |      |      |       |     |     |     |       |      |     |       |       |       |     | 100   | 66           |
| 16   | 21       | Feohy + Cal + Qz + | 11.39 |       | 1.26  | 50.73 |     | 1.6  | 35.02 |      |      |       |       |      |      |       |     |     |     |       |      |     |       |       |       |     | 100   | 67           |
| 16   | 22       | Cal + Qz           | 19.22 |       |       |       |     |      | 80.78 |      |      |       |       |      |      |       |     |     |     |       |      |     |       |       |       |     | 100   | 60           |
| 16   | 23       | Cal + Qz           | 41.9  |       |       |       |     |      | 58.1  |      |      |       |       |      |      |       |     |     |     |       |      |     |       |       |       |     | 100   | 71           |
| 16   | 24       | Cal + Qz           | 36.59 |       |       |       |     |      | 63.42 |      |      |       |       |      |      |       |     |     |     |       |      |     |       |       |       |     | 100   | 67           |

Table S12.1: Scanning Electron Microscope (SEM) mineral chemical analyses (EDS) of SK5.

| Site | Position | Mineral            | SiO2  | TiO2 | Al2O3 | FeO   | MnO  | MgO  | CaO   | Na2O | K2O  | P2O5  | SO3   | F    | Cl   | Cr2O3 | CoO   | CuO  | ZnO | ZrO2 | Ag2O | BaO   | La2O3 | Ce2O3 | Nd2O3 | WO3 | Total | Actual Total |
|------|----------|--------------------|-------|------|-------|-------|------|------|-------|------|------|-------|-------|------|------|-------|-------|------|-----|------|------|-------|-------|-------|-------|-----|-------|--------------|
| 16   | 25       | Cal + Qz           | 35.57 |      |       |       |      | 0.62 | 63.81 |      |      |       |       |      |      |       |       |      |     |      |      |       |       |       |       |     | 100   | 67           |
| 16   | 26       | Qz                 | 100   |      |       |       |      |      |       |      |      |       |       |      |      |       |       |      |     |      |      |       |       |       |       |     | 100   | 107          |
| 16   | 27       | Qz                 | 100   |      |       |       |      |      |       |      |      |       |       |      |      |       |       |      |     |      |      |       |       |       |       |     | 100   | 114          |
| 16   | 28       | Qz                 | 100   |      |       |       |      |      |       |      |      |       |       |      |      |       |       |      |     |      |      |       |       |       |       |     | 100   | 109          |
| 17   | 1        | Feohy + Qz +       | 7.13  |      |       | 90.96 |      |      | 0.72  |      |      |       | 1.18  |      |      |       |       |      |     |      |      |       |       |       |       |     | 100   | 72           |
| 17   | 2        | Feohy + Qz +       | 12.95 |      | 1     | 64.08 | 3.66 | 2.44 | 13.02 |      |      |       | 1.44  |      | 0.37 |       |       | 1.03 |     |      |      |       |       |       |       |     | 100   | 59           |
| 17   | 3        | Qz                 | 100   |      |       |       |      |      |       |      |      |       |       |      |      |       |       |      |     |      |      |       |       |       |       |     | 100   | 105          |
| 17   | 4        | Cal + Qz           | 17.05 |      |       |       |      |      | 82.95 |      |      |       |       |      |      |       |       |      |     |      |      |       |       |       |       |     | 100   | 56           |
| 17   | 5        | Cal + Feohy + Qz   | 9.41  |      |       | 39.45 |      |      | 51.13 |      |      |       |       |      |      |       |       |      |     |      |      |       |       |       |       |     | 100   | 59           |
| 17   | 6        | Feohy + Qz + Cal   | 32.16 |      |       | 58.6  |      | 0.5  | 8.01  |      |      |       |       |      |      |       |       | 0.73 |     |      |      |       |       |       |       |     | 100   | 80           |
| 17   | 7        | Cal + Qz           | 7.2   |      |       |       |      |      | 92.8  |      |      |       |       |      |      |       |       |      |     |      |      |       |       |       |       |     | 100   | 51           |
| 17   | 8        | Feohy + Qz + Cal + | 36.99 |      | 1.22  | 47.91 | 0.62 |      | 12.42 |      |      |       |       |      |      |       |       | 0.83 |     |      |      |       |       |       |       |     | 100   | 78           |
| 17   | 9        | Qz                 | 100   |      |       |       |      |      |       |      |      |       |       |      |      |       |       |      |     |      |      |       |       |       |       |     | 100   | 101          |
| 17   | 10       | Cal                | 1.66  |      |       |       |      | 1.31 | 97.03 |      |      |       |       |      |      |       |       |      |     |      |      |       |       |       |       |     | 100   | 52           |
| 17   | 11       | Feohy + Cal + Qz + | 8.41  | 22.3 | 1.22  | 40.96 |      | 0.68 | 21.34 |      |      |       | 4.29  |      |      |       |       | 0.8  |     |      |      |       |       |       |       |     | 100   | 66           |
| 17   | 12       | Cal                | 1.92  |      |       |       |      | 1.16 | 96.92 |      |      |       |       |      |      |       |       |      |     |      |      |       |       |       |       |     | 100   | 53           |
| 17   | 13       | Cal + Gth +        | 18.7  |      | 1.9   | 26.75 |      |      | 52.65 |      |      |       |       |      |      |       |       |      |     |      |      |       |       |       |       |     | 100   | 67           |
| 17   | 14       | Ap + Qz            | 4.97  |      |       |       |      |      | 49.52 | 0.84 |      | 37.14 | 1.34  | 6.19 |      |       |       |      |     |      |      |       |       |       |       |     | 100   | 95           |
| 17   | 15       | Qz                 | 100   |      |       |       |      |      |       |      |      |       |       |      |      |       |       |      |     |      |      |       |       |       |       |     | 100   | 111          |
| 18   | 1        | Qz                 | 98.24 |      | 0.96  | 0.3   |      | 0.27 |       |      | 0.22 |       |       |      |      |       |       |      |     |      |      |       |       |       |       |     | 100   | 104          |
| 18   | 2        | Ap + Qz            | 1.1   |      |       |       |      |      | 50.23 | 0.78 |      | 40.25 | 1.52  | 5.77 | 0.34 |       |       |      |     |      |      |       |       |       |       |     | 100   | 86           |
| 18   | 3        | Ap                 | 0.96  |      |       |       |      |      | 50.06 | 0.88 |      | 40.9  | 1.32  | 5.87 |      |       |       |      |     |      |      |       |       |       |       |     | 100   | 76           |
| 18   | 4        | Ap + Qz            | 20.98 |      |       |       |      |      | 39.55 | 0.74 |      | 32.63 | 1.17  | 4.94 |      |       |       |      |     |      |      |       |       |       |       |     | 100   | 90           |
| 19   | 1        | Qz                 | 100   |      |       |       |      |      |       |      |      |       |       |      |      |       |       |      |     |      |      |       |       |       |       |     | 100   | 103          |
| 19   | 2        | Cal + Qz           | 31.75 |      |       |       |      |      | 68.25 |      |      |       |       |      |      |       |       |      |     |      |      |       |       |       |       |     | 100   | 60           |
| 19   | 3        | Qz                 | 99.71 |      |       |       |      |      | 0.29  |      |      |       |       |      |      |       |       |      |     |      |      |       |       |       |       |     | 100   | 108          |
| 19   | 4        | Cal + Qz           | 16.08 |      |       |       |      | 1.23 | 82.69 |      |      |       |       |      |      |       |       |      |     |      |      |       |       |       |       |     | 100   | 57           |
| 19   | 5        | Qz                 | 100   |      |       |       |      |      |       |      |      |       |       |      |      |       |       |      |     |      |      |       |       |       |       |     | 100   | 105          |
| 19   | 6        | Cal + Qz           | 29.29 |      |       |       |      |      | 70.71 |      |      |       |       |      |      |       |       |      |     |      |      |       |       |       |       |     | 100   | 60           |
| 19   | 7        | Cal + Qz           | 36.72 |      |       |       |      | 0.94 | 62.34 |      |      |       |       |      |      |       |       |      |     |      |      |       |       |       |       |     | 100   | 67           |
| 19   | 8        | Qz                 | 100   |      |       |       |      |      |       |      |      |       |       |      |      |       |       |      |     |      |      |       |       |       |       |     | 100   | 101          |
| 19   | 9        | Qz                 | 100   |      |       |       |      |      |       |      |      |       |       |      |      |       |       |      |     |      |      |       |       |       |       |     | 100   | 101          |
| 19   | 10       | Cal + Qz           | 46.28 |      |       |       |      |      | 53.72 |      |      |       |       |      |      |       |       |      |     |      |      |       |       |       |       |     | 100   | 67           |
| 19   | 11       | Cal + Qz           | 5.61  |      |       |       |      |      | 94.39 |      |      |       |       |      |      |       |       |      |     |      |      |       |       |       |       |     | 100   | 49           |
| 19   | 12       | Qz + Feohy         | 75.08 |      | 1.16  | 23.26 |      | 0.5  |       |      |      |       |       |      |      |       |       |      |     |      |      |       |       |       |       |     | 100   | 82           |
| 20   | 1        | Qz                 | 99.44 |      |       |       |      |      | 0.56  |      |      |       |       |      |      |       |       |      |     |      |      |       |       |       |       |     | 100   | 110          |
| 20   | 2        | Qz + Cal           | 97.91 |      |       |       |      |      | 2.09  |      |      |       |       |      |      |       |       |      |     |      |      |       |       |       |       |     | 100   | 113          |
| 20   | 3        | Cal + Qz           | 7.57  |      |       |       |      | 0.71 | 91.72 |      |      |       |       |      |      |       |       |      |     |      |      |       |       |       |       |     | 100   | 57           |
| 20   | 4        | Brt + Qz +         | 18.03 |      | 0.91  |       |      |      | 5.72  |      | 0.29 |       | 27.52 |      |      |       |       |      |     |      |      | 47.52 |       |       |       |     | 100   | 102          |
| 20   | 5        | Cal                |       |      |       |       |      | 0.61 | 55.39 |      |      |       |       |      |      |       |       |      |     |      |      |       |       |       |       |     | 56    | 55           |
| 20   | 6        | Feohy + Qz + Cal   | 6.93  |      |       | 88.09 |      |      | 1.83  |      |      |       |       |      |      |       |       | 3.16 |     |      |      |       |       |       |       |     | 100   | 78           |
| 20   | 7        | Feohy + Qz + Cal   | 6.81  |      | 1.12  | 85.63 |      |      | 2.61  |      |      |       |       |      |      |       |       | 3.83 |     |      |      |       |       |       |       |     | 100   | 79           |
| 20   | 8        | Qz                 | 99.5  |      |       |       |      |      | 0.5   |      |      |       |       |      |      |       |       |      |     |      |      |       |       |       |       |     | 100   | 119          |
| 20   | 9        | Qz                 | 99.51 |      |       |       |      |      | 0.49  |      |      |       |       |      |      |       |       |      |     |      |      |       |       |       |       |     | 100   | 115          |
| 20   | 10       | Cal + Qz           | 2.52  |      |       |       |      | 0.66 | 96.82 |      |      |       |       |      |      |       |       |      |     |      |      |       |       |       |       |     | 100   | 58           |
| 20   | 11       | Qz                 | 99.64 |      |       |       |      |      | 0.36  |      |      |       |       |      |      |       |       |      |     |      |      |       |       |       |       |     | 100   | 113          |
| 20   | 12       | Cal                | 1.75  |      |       |       |      |      | 98.25 |      |      |       |       |      |      |       |       |      |     |      |      |       |       |       |       |     | 100   | 55           |
| 20   | 13       | Qz                 | 99.27 |      |       |       |      |      | 0.73  |      |      |       |       |      |      |       |       |      |     |      |      |       |       |       |       |     | 100   | 116          |
| 20   | 14       | Qz +               | 98.12 |      | 0.52  |       |      |      | 1.17  |      | 0.19 |       |       |      |      |       |       |      |     |      |      |       |       |       |       |     | 100   | 114          |
| 21   | 1        | Qz                 | 100   |      |       |       |      |      |       |      |      |       |       |      |      |       |       |      |     |      |      |       |       |       |       |     | 100   | 106          |
| 21   | 2        | Cal + Qz           | 19.65 |      |       |       |      | 2.1  | 78.25 |      |      |       |       |      |      |       |       |      |     |      |      |       |       |       |       |     | 100   | 59           |
| 21   | 3        | Qz                 | 99.67 |      |       |       |      |      | 0.33  |      |      |       |       |      |      |       |       |      |     |      |      |       |       |       |       |     | 100   | 103          |
| 21   | 4        | Cal + Qz           | 25.88 |      |       |       |      |      | 74.12 |      |      |       |       |      |      |       |       |      |     |      |      |       |       |       |       |     | 100   | 62           |
| 21   | 5        | Brt + Cal + Qz     | 1.8   |      |       |       |      |      | 21.52 |      |      |       | 29.3  |      |      |       | -0.03 |      |     |      |      | 47.42 |       |       |       |     | 100   | 93           |
| 21   | 6        | Brt + Cal + Qz     | 3.87  |      |       |       |      |      | 3.66  |      |      |       | 34.19 |      |      |       | 0.01  |      |     |      |      | 58.27 |       |       |       |     | 100   | 104          |

Table S12.1: Scanning Electron Microscope (SEM) mineral chemical analyses (EDS) of SK5.

| Site | Position | Mineral        | SiO <sub>2</sub> | TiO <sub>2</sub> | Al <sub>2</sub> O <sub>3</sub> | FeO  | MnO  | MgO   | CaO   | Na <sub>2</sub> O | K <sub>2</sub> O | P <sub>2</sub> O <sub>5</sub> | SO <sub>3</sub> | F    | Cl   | Cr <sub>2</sub> O <sub>3</sub> | CoO   | CuO | ZnO  | ZrO <sub>2</sub> | Ag <sub>2</sub> O | BaO   | La <sub>2</sub> O <sub>3</sub> | Ce <sub>2</sub> O <sub>3</sub> | Nd <sub>2</sub> O <sub>3</sub> | WO <sub>3</sub> | Total | Actual Total |
|------|----------|----------------|------------------|------------------|--------------------------------|------|------|-------|-------|-------------------|------------------|-------------------------------|-----------------|------|------|--------------------------------|-------|-----|------|------------------|-------------------|-------|--------------------------------|--------------------------------|--------------------------------|-----------------|-------|--------------|
| 21   | 7        | Brt + Cal + Qz | 11.11            |                  |                                |      |      | 16.8  |       |                   |                  |                               | 26.62           |      |      |                                | -0.09 |     |      |                  |                   | 45.57 |                                |                                |                                |                 | 100   | 89           |
| 21   | 8        | Cal + Qz       | 12.13            |                  |                                |      |      | 2.11  | 85.77 |                   |                  |                               |                 |      |      |                                |       |     |      |                  |                   |       |                                |                                |                                |                 | 100   | 57           |
| 21   | 9        | Brt + Cal + Qz | 7.93             |                  |                                |      |      | 21.79 | 0.56  |                   |                  |                               | 26.01           |      |      |                                | -0.25 |     |      |                  |                   | 43.97 |                                |                                |                                |                 | 100   | 91           |
| 21   | 10       | Cal + Qz       | 9.71             |                  |                                |      |      | 90.29 |       |                   |                  |                               |                 |      |      |                                |       |     |      |                  |                   |       |                                |                                |                                |                 | 100   | 56           |
| 21   | 11       | Brt + Cal + Qz | 5.96             |                  |                                |      |      | 13.42 |       |                   |                  |                               | 29.83           |      |      |                                | -0.05 |     |      |                  |                   | 50.84 |                                |                                |                                |                 | 100   | 96           |
| 21   | 12       | Brt + Cal + Qz | 7.87             |                  |                                |      |      | 23.63 |       |                   |                  |                               | 23.65           |      |      |                                | -0.04 |     |      |                  |                   | 44.89 |                                |                                |                                |                 | 100   | 85           |
| 21   | 13       | Brt + Cal + Qz | 8.49             |                  |                                |      |      | 6.32  |       |                   |                  |                               | 31.06           |      |      |                                | 0.21  |     |      |                  |                   | 53.92 |                                |                                |                                |                 | 100   | 105          |
| 21   | 14       | Cal + Qz       | 8.55             |                  |                                |      |      | 91.45 |       |                   |                  |                               |                 |      |      |                                |       |     |      |                  |                   |       |                                |                                |                                |                 | 100   | 55           |
| 21   | 15       | Brt + Cal + Qz | 3.22             |                  |                                |      |      | 9.45  |       |                   |                  |                               | 32.33           |      |      |                                | -0.1  |     |      |                  |                   | 55.09 |                                |                                |                                |                 | 100   | 101          |
| 21   | 16       | Brt + Cal + Qz | 2.67             |                  |                                |      |      | 4.33  |       |                   |                  |                               | 33.87           |      |      |                                | 0.01  |     |      |                  |                   | 59.13 |                                |                                |                                |                 | 100   | 104          |
| 21   | 17       | Cal + Qz       | 8.87             |                  |                                |      |      | 91.13 |       |                   |                  |                               |                 |      |      |                                |       |     |      |                  |                   |       |                                |                                |                                |                 | 100   | 57           |
| 21   | 18       | Cal + Qz       | 23.78            |                  |                                |      |      | 76.22 |       |                   |                  |                               |                 |      |      |                                |       |     |      |                  |                   |       |                                |                                |                                |                 | 100   | 62           |
| 21   | 19       | Brt + Cal + Qz | 6.51             |                  |                                |      |      | 26.92 |       |                   |                  |                               | 23.25           |      |      |                                | -0.06 |     |      |                  |                   | 43.38 |                                |                                |                                |                 | 100   | 81           |
| 21   | 20       | Brt + Cal + Qz | 7.46             |                  |                                |      |      | 16.57 |       |                   |                  |                               | 27.53           |      |      |                                |       |     |      |                  |                   | 48.45 |                                |                                |                                |                 | 100   | 94           |
| 21   | 21       | Cal + Qz       | 13.36            |                  |                                |      |      | 86.64 |       |                   |                  |                               |                 |      |      |                                |       |     |      |                  |                   |       |                                |                                |                                |                 | 100   | 57           |
| 21   | 22       | Brt + Cal + Qz | 23.74            |                  |                                |      |      | 42.65 |       |                   |                  |                               | 11.44           |      |      |                                |       |     |      |                  |                   | 22.17 |                                |                                |                                |                 | 100   | 76           |
| 21   | 23       | Cal + Qz       | 4.65             |                  |                                |      |      | 95.35 |       |                   |                  |                               |                 |      |      |                                |       |     |      |                  |                   |       |                                |                                |                                |                 | 100   | 55           |
| 21   | 24       | Cal + Qz       | 44.71            |                  |                                |      | 0.96 | 54.33 |       |                   |                  |                               |                 |      |      |                                |       |     |      |                  |                   |       |                                |                                |                                |                 | 100   | 74           |
| 21   | 25       | Brt + Cal + Qz | 20.66            |                  |                                |      | 0.66 | 26.74 |       |                   |                  |                               | 19.55           |      |      |                                | 0.01  |     |      |                  |                   | 32.37 |                                |                                |                                |                 | 100   | 81           |
| 21   | 26       | Brt + Cal + Qz | 13.53            |                  |                                |      |      | 25.03 |       |                   |                  |                               | 22.86           |      |      |                                | -0.05 |     |      |                  |                   | 38.63 |                                |                                |                                |                 | 100   | 86           |
| 21   | 27       | Brt + Cal + Qz | 22.43            |                  |                                |      | 0.7  | 49.31 |       |                   |                  |                               | 9.16            |      |      |                                |       |     |      |                  |                   | 18.4  |                                |                                |                                |                 | 100   | 72           |
| 21   | 28       | Cal + Qz       | 24.97            |                  |                                |      |      | 75.03 |       |                   |                  |                               |                 |      |      |                                |       |     |      |                  |                   |       |                                |                                |                                |                 | 100   | 64           |
| 21   | 29       | Qz             | 99.03            |                  | 0.56                           |      |      | 0.24  |       | 0.17              |                  |                               |                 |      |      |                                |       |     |      |                  |                   |       |                                |                                |                                |                 | 100   | 111          |
| 21   | 30       | Qz             | 100              |                  |                                |      |      |       |       |                   |                  |                               |                 |      |      |                                |       |     |      |                  |                   |       |                                |                                |                                |                 | 100   | 112          |
| 21   | 31       | Brt + Cal + Qz | 20.91            |                  |                                |      |      | 40.12 |       |                   |                  |                               | 13.52           |      |      |                                | 0.04  |     |      |                  |                   | 25.4  |                                |                                |                                |                 | 100   | 76           |
| 22   | 1        | Brt + Cal + Qz | 11.22            |                  |                                |      |      | 10.31 |       |                   |                  |                               | 29.63           |      |      |                                | -0.01 |     |      |                  |                   | 48.85 |                                |                                |                                |                 | 100   | 91           |
| 22   | 2        | Brt + Cal + Qz | 1.48             |                  |                                |      |      | 19.85 | 0.52  |                   |                  |                               | 29.21           |      |      |                                | 0.09  |     |      |                  |                   | 48.85 |                                |                                |                                |                 | 100   | 85           |
| 22   | 3        | Brt + Cal + Qz | 4.33             |                  |                                |      |      | 17.57 |       |                   |                  |                               | 28.14           |      |      |                                | 0.19  |     |      |                  |                   | 49.78 |                                |                                |                                |                 | 100   | 79           |
| 22   | 4        | Brt + Cal + Qz | 3.08             |                  |                                |      |      | 24.55 |       |                   |                  |                               | 26.74           |      |      |                                | -0.07 |     |      |                  |                   | 45.7  |                                |                                |                                |                 | 100   | 76           |
| 22   | 5        | Cal            |                  |                  |                                |      |      | 56    |       |                   |                  |                               |                 |      |      |                                |       |     |      |                  |                   |       |                                |                                |                                |                 | 56    | 56           |
| 22   | 6        | Qz + Cal +     | 77.16            |                  | 3.48                           | 0.83 |      | 0.48  | 17.07 |                   | 0.98             |                               |                 |      |      |                                |       |     |      |                  |                   |       |                                |                                |                                |                 | 100   | 97           |
| 22   | 7        | Cal            |                  |                  |                                |      |      | 0.538 | 55.46 |                   |                  |                               |                 |      |      |                                |       |     |      |                  |                   |       |                                |                                |                                |                 | 56    | 55           |
| 22   | 8        | Qz + Cal +     | 74.81            |                  | 2.8                            | 0.57 |      | 0.52  | 20.6  |                   | 0.7              |                               |                 |      |      |                                |       |     |      |                  |                   |       |                                |                                |                                |                 | 100   | 87           |
| 22   | 9        | Qz + Cal       | 66.89            |                  |                                |      |      | 0.52  | 32.59 |                   |                  |                               |                 |      |      |                                |       |     |      |                  |                   |       |                                |                                |                                |                 | 100   | 89           |
| 22   | 10       | Qz             | 99.64            |                  |                                |      |      | 0.36  |       |                   |                  |                               |                 |      |      |                                |       |     |      |                  |                   |       |                                |                                |                                |                 | 100   | 117          |
| 22   | 11       | Cal            | 1.12             |                  |                                |      |      | 0.7   | 98.18 |                   |                  |                               |                 |      |      |                                |       |     |      |                  |                   |       |                                |                                |                                |                 | 100   | 57           |
| 22   | 12       | Qz             | 99.72            |                  |                                |      |      | 0.28  |       |                   |                  |                               |                 |      |      |                                |       |     |      |                  |                   |       |                                |                                |                                |                 | 100   | 116          |
| 22   | 13       | Cal + Qz       | 40.82            |                  |                                |      |      | 0.73  | 58.45 |                   |                  |                               |                 |      |      |                                |       |     |      |                  |                   |       |                                |                                |                                |                 | 100   | 73           |
| 22   | 14       | Cal + Qz       | 40.85            |                  |                                |      |      | 0.62  | 58.54 |                   |                  |                               |                 |      |      |                                |       |     |      |                  |                   |       |                                |                                |                                |                 | 100   | 73           |
| 22   | 15       | Qz + Cal       | 69.81            |                  |                                |      |      | 29.94 |       | 0.25              |                  |                               |                 |      |      |                                |       |     |      |                  |                   |       |                                |                                |                                |                 | 100   | 94           |
| 22   | 16       | Qz + Cal       | 90.89            |                  |                                | 0.77 | 1.48 | 3.87  | 0.45  |                   |                  |                               | 1.82            |      |      |                                |       |     | 0.73 |                  |                   |       |                                |                                |                                |                 | 100   | 77           |
| 22   | 17       | Cal + Qz       | 45.6             |                  |                                |      |      | 0.47  | 53.92 |                   |                  |                               |                 |      |      |                                |       |     |      |                  |                   |       |                                |                                |                                |                 | 100   | 76           |
| 22   | 18       | Qz             | 99.38            |                  |                                |      |      |       | 0.41  |                   |                  |                               |                 |      | 0.21 |                                |       |     |      |                  |                   |       |                                |                                |                                |                 | 100   | 96           |
| 22   | 19       | Qz + Cal       | 97.52            |                  |                                |      |      | 2.48  |       |                   |                  |                               |                 |      |      |                                |       |     |      |                  |                   |       |                                |                                |                                |                 | 100   | 118          |
| 22   | 20       | Qz + Cal +     | 88.62            |                  | 0.72                           | 0.7  | 1.9  | 4.38  | 0.74  |                   |                  |                               | 2.17            |      |      |                                |       |     | 0.76 |                  |                   |       |                                |                                |                                |                 | 100   | 94           |
| 22   | 21       | Hole?          | 68.34            |                  | 1.67                           | 2.69 | 4.28 | 9.95  |       |                   |                  | 2.28                          | 7.87            |      | 0.5  |                                |       |     | 2.41 |                  |                   |       |                                |                                |                                |                 | 100   | 46           |
| 22   | 22       | Qz             | 99.73            |                  |                                |      |      | 0.27  |       |                   |                  |                               |                 |      |      |                                |       |     |      |                  |                   |       |                                |                                |                                |                 | 100   | 117          |
| 22   | 23       | Qz             | 99.65            |                  |                                |      |      | 0.35  |       |                   |                  |                               |                 |      |      |                                |       |     |      |                  |                   |       |                                |                                |                                |                 | 100   | 117          |
| 22   | 24       | Qz + Cal       | 72.12            |                  |                                |      |      | 27.88 |       |                   |                  |                               |                 |      |      |                                |       |     |      |                  |                   |       |                                |                                |                                |                 | 100   | 87           |
| 22   | 25       | Ap + Qz        | 1.52             |                  |                                |      |      | 49.32 | 1.26  |                   |                  | 38.16                         | 1.94            | 7.28 | 0.52 |                                |       |     |      |                  |                   |       |                                |                                |                                |                 | 100   | 95           |
| 22   | 26       | Brt + Cal + Qz | 1.64             |                  |                                |      |      | 32.21 |       |                   |                  |                               | 23.63           |      | 0.32 |                                | 0.2   |     |      |                  |                   | 42.01 |                                |                                |                                |                 | 100   | 76           |
| 22   | 27       | Cal + Qz +     | 24.03            | 9.66             | 1.04                           | 4.27 |      | 60.65 |       | 0.34              |                  |                               |                 |      |      |                                |       |     |      |                  |                   |       |                                |                                |                                |                 | 100   | 67           |

Supplementary Material S13: SEM-BSE images and Electron Dispersive Spectroscopy (EDS) mineral analyses for sample SK4a.

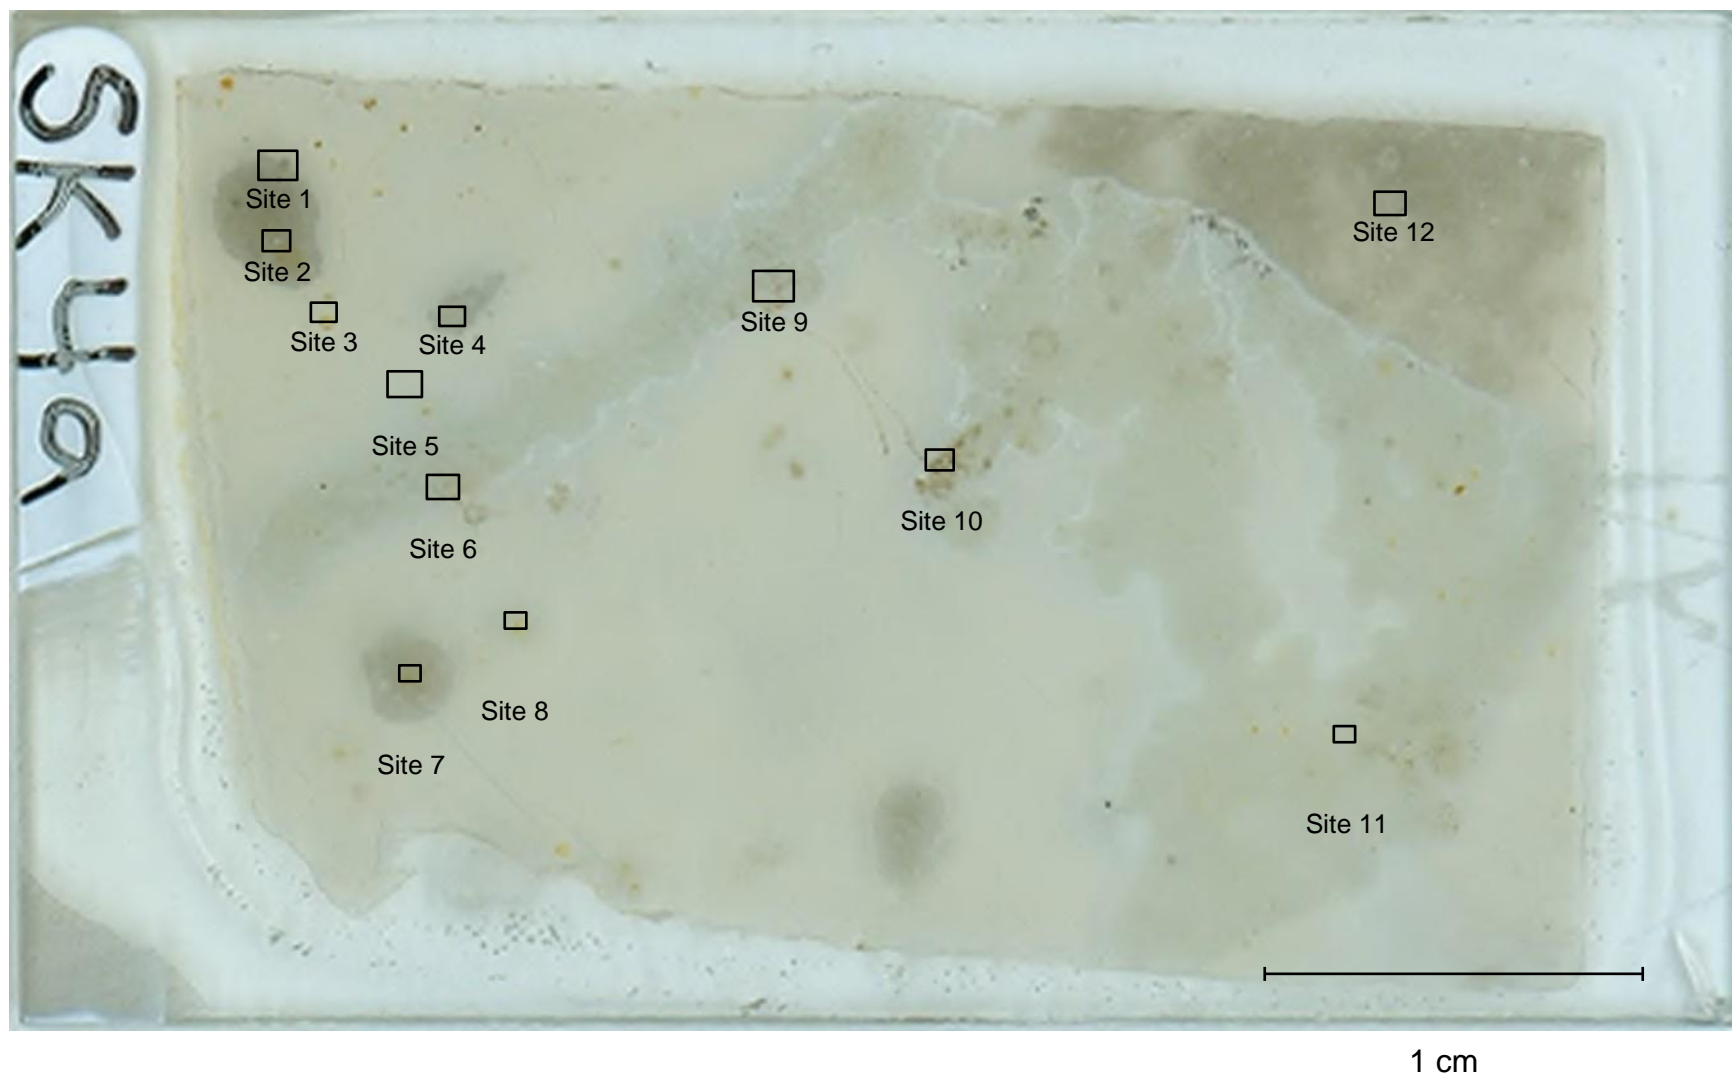

Figure S13.1: SK4a thin section showing respective sites taken for mineral chemical analyses (EDS) via Scanning Electron Microscope (SEM).



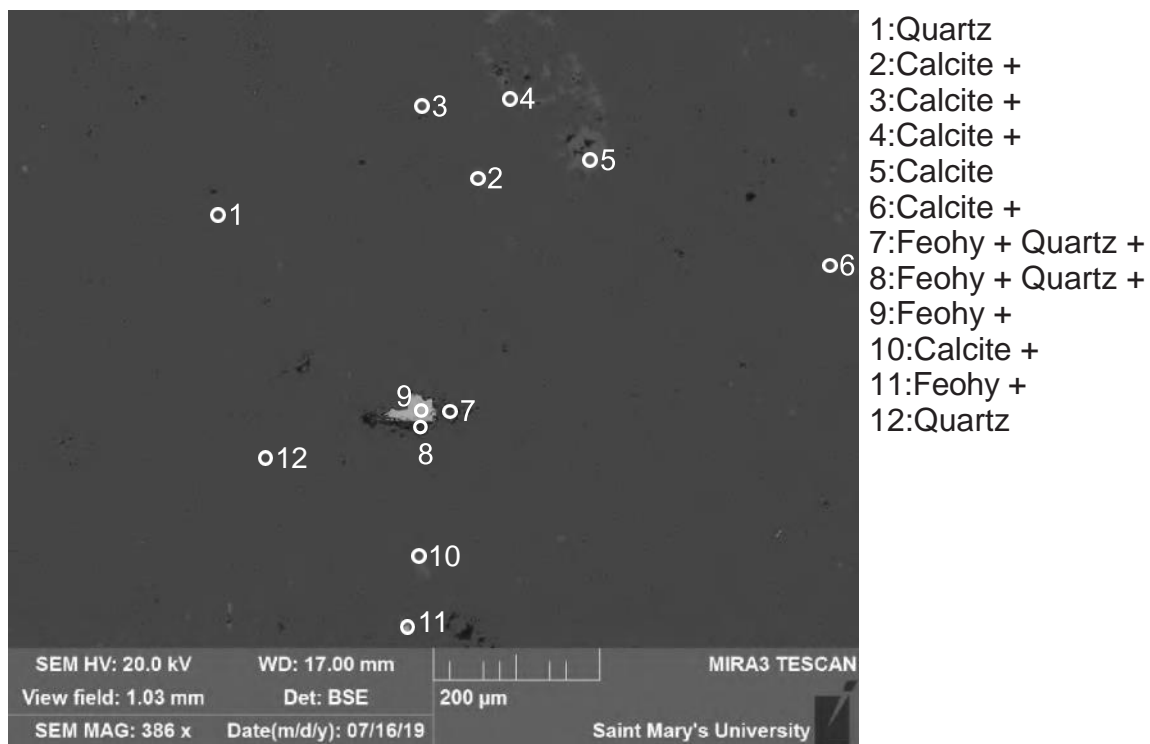

Figure S13.2: SK4a (SEM) Site 1 (Table S13.1).

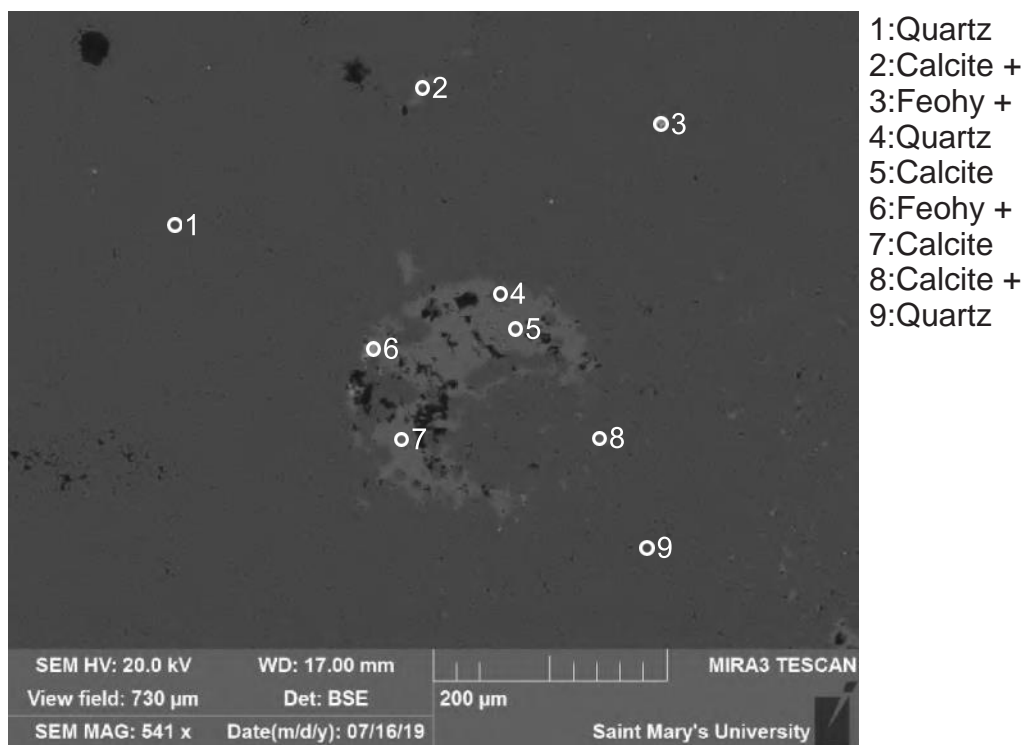

Figure S13.3: SK4a (SEM) Site 2 (Table S13.1).

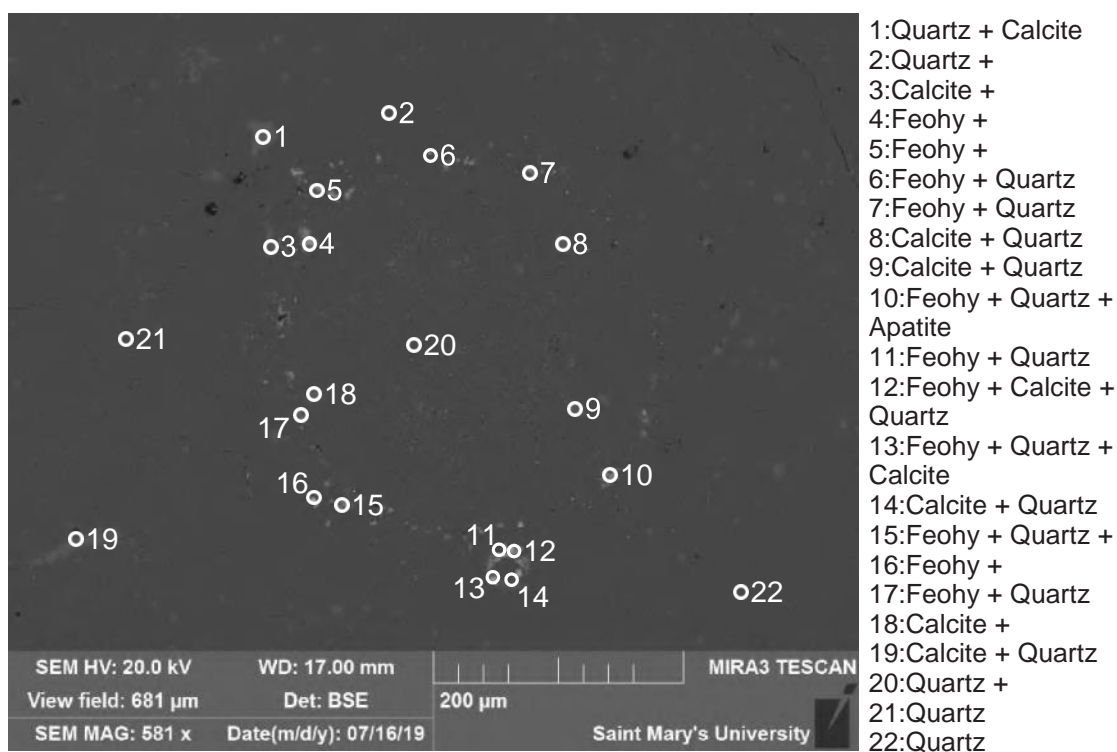

Figure S13.4: SK4a (SEM) Site 3 (Table S13.1).

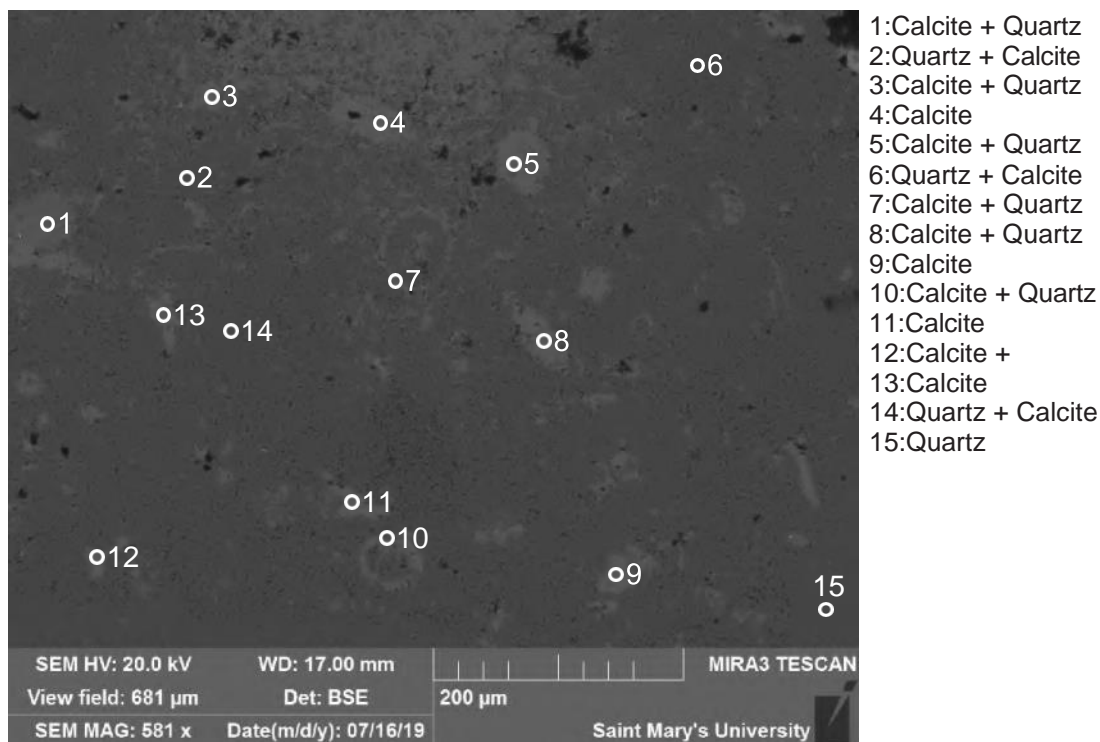

Figure S13.5: SK4a (SEM) Site 4 (Table S13.1).

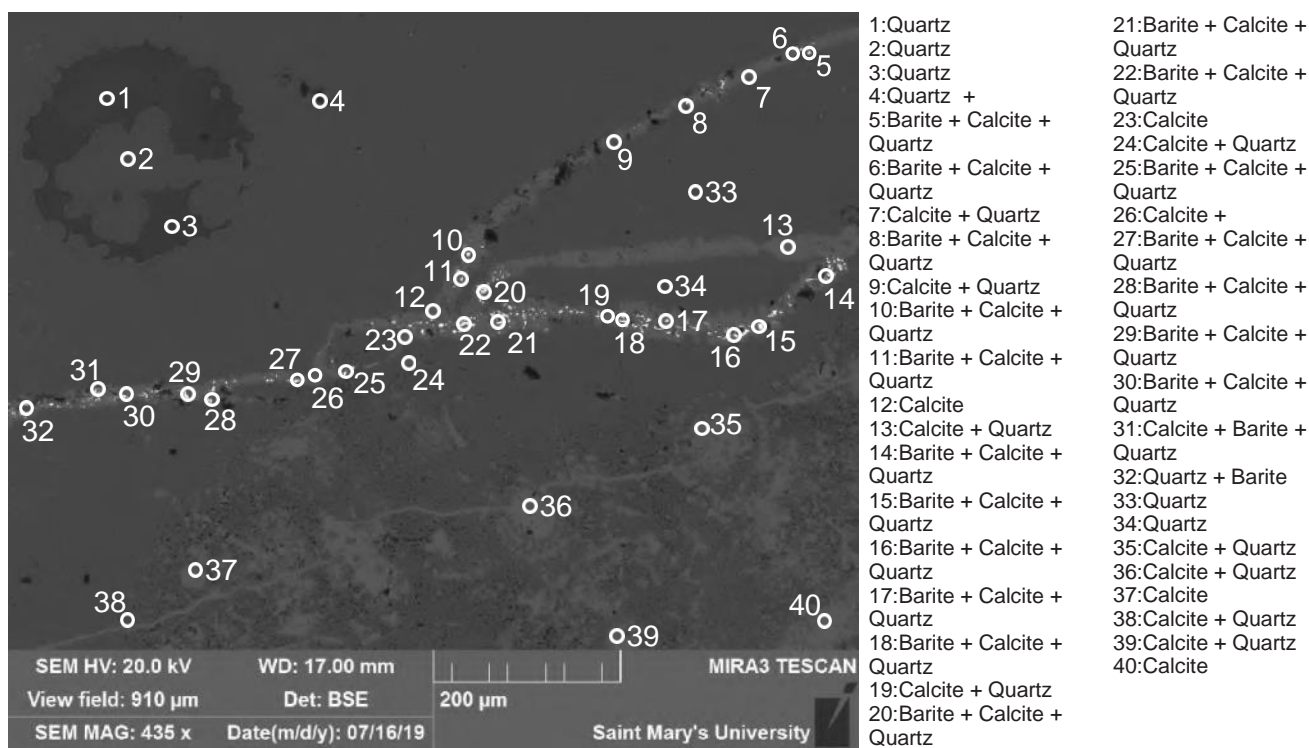

Figure S13.6: SK4a (SEM) Site 5 (Table S13.1).

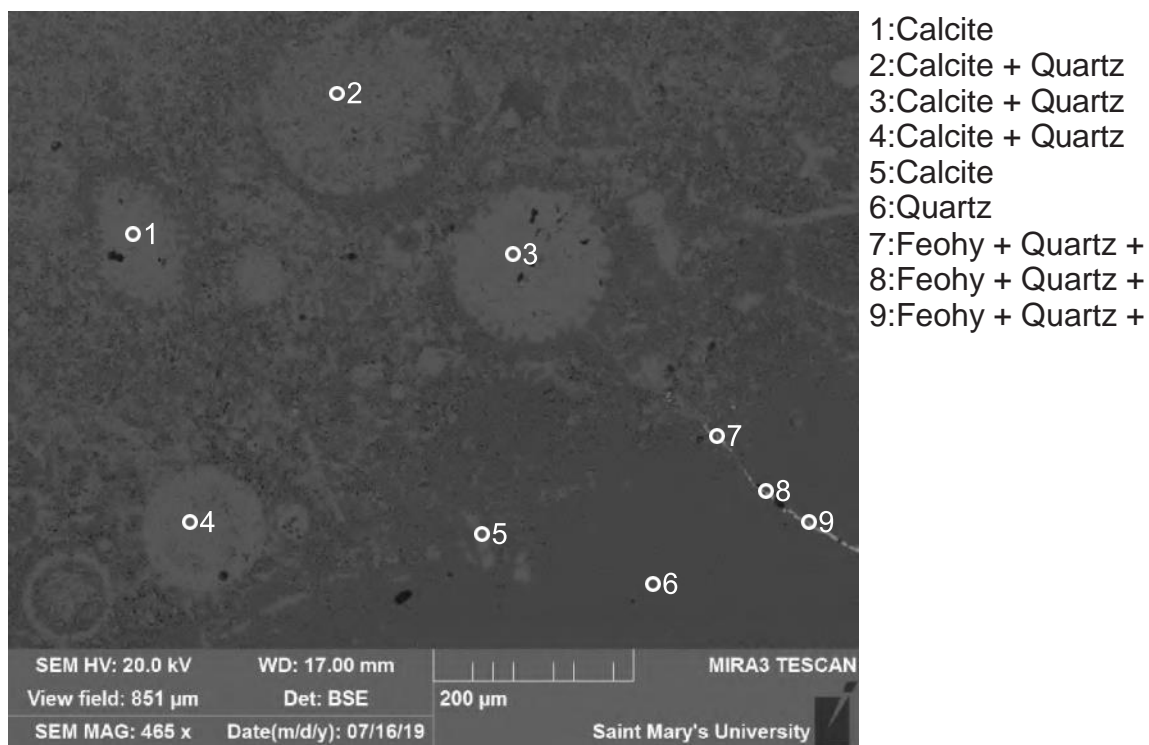

Figure S13.7: SK4a (SEM) Site 6 (Table S13.1).

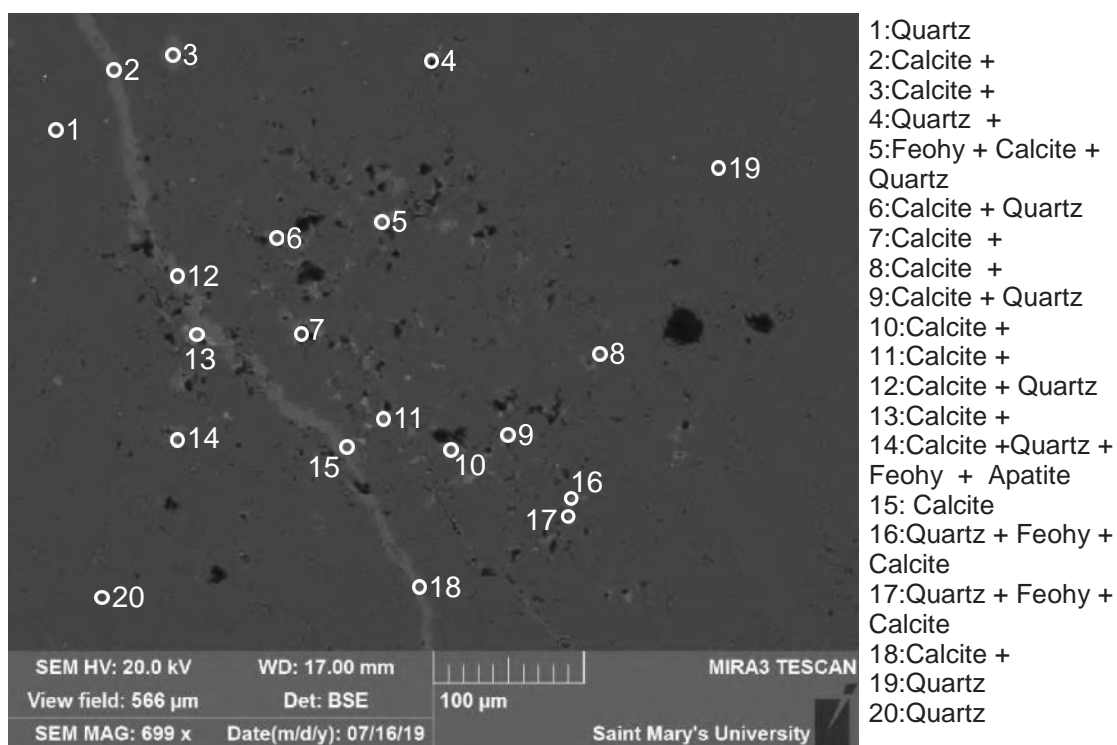

Figure S13.8: SK4a (SEM) Site 7 (Table S13.1).

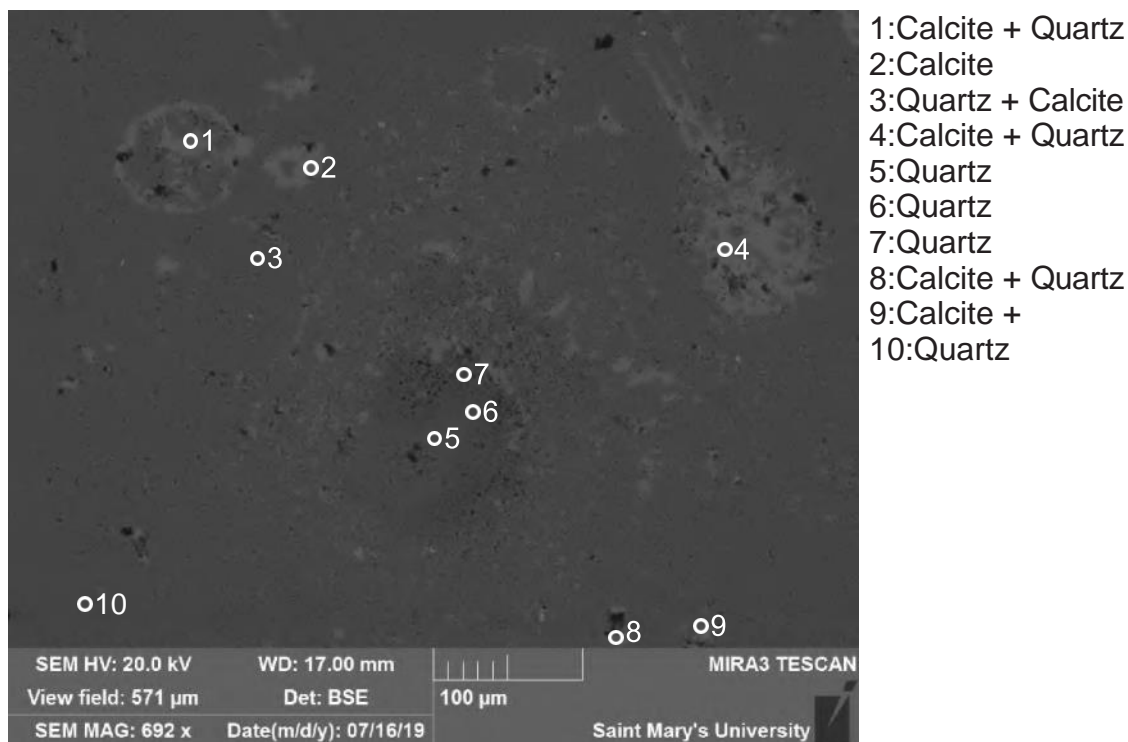

Figure S13.9: SK4a (SEM) Site 8 (Table S13.1).

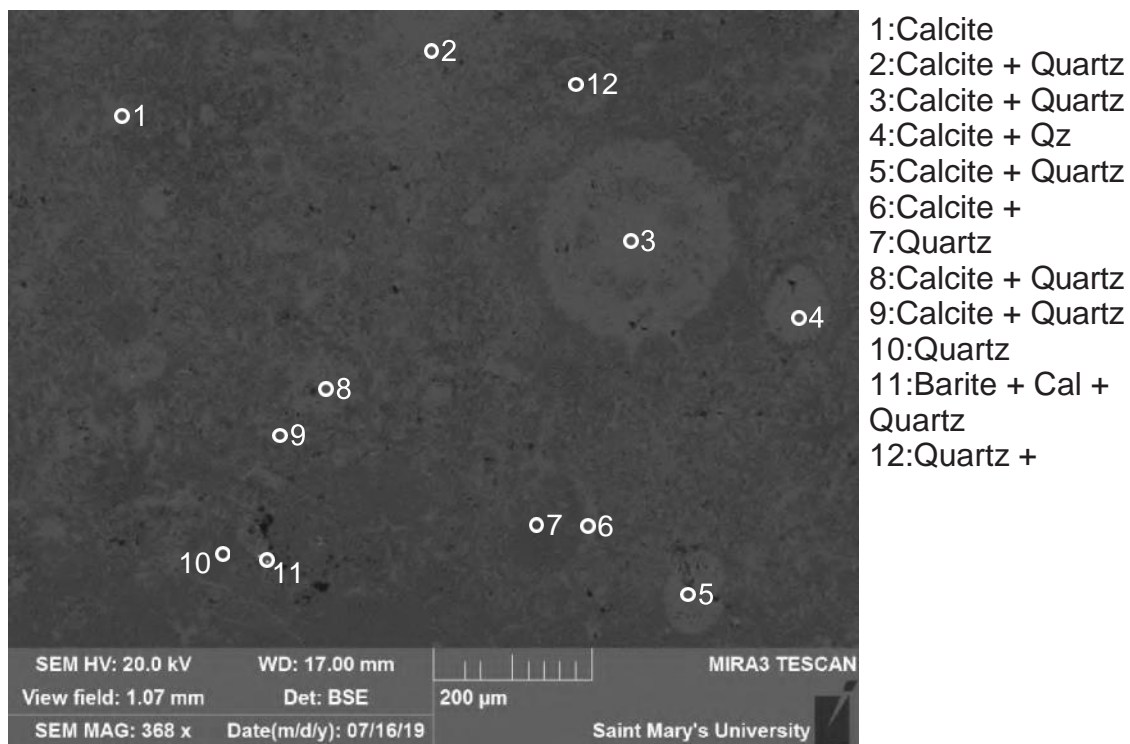

Figure S13.10: SK4a (SEM) Site 9 (Table S13.1).

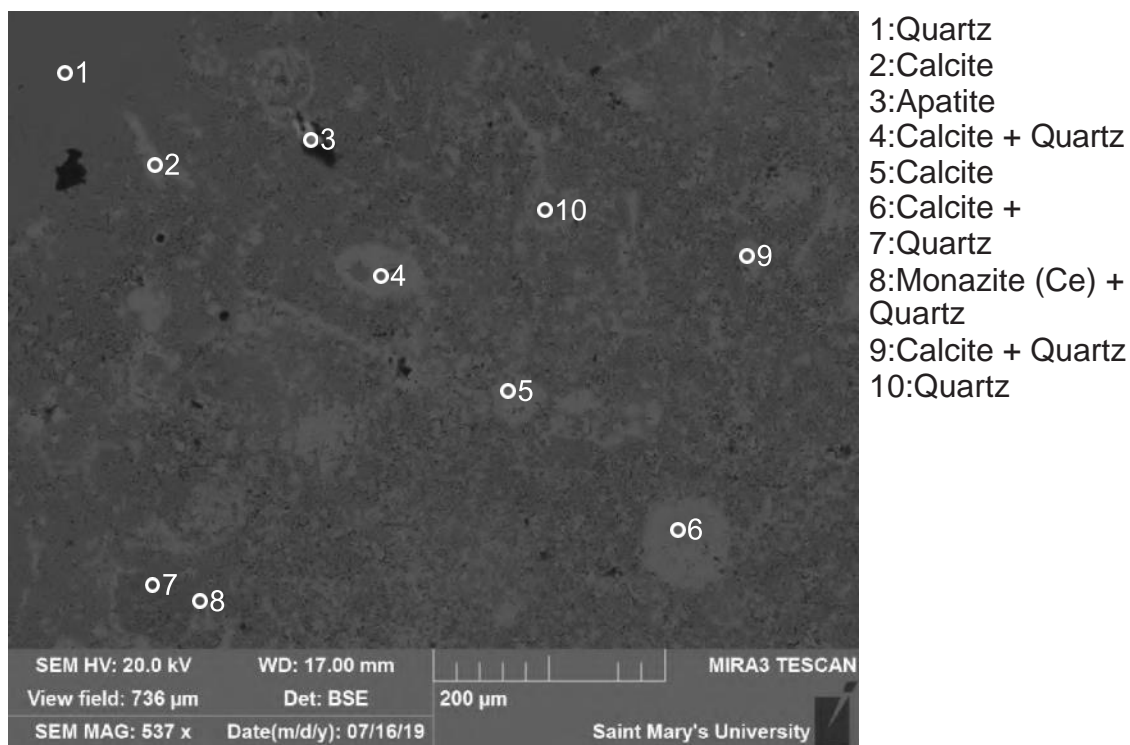

Figure S13.11: SK4a (SEM) Site 10 (Table S13.1).



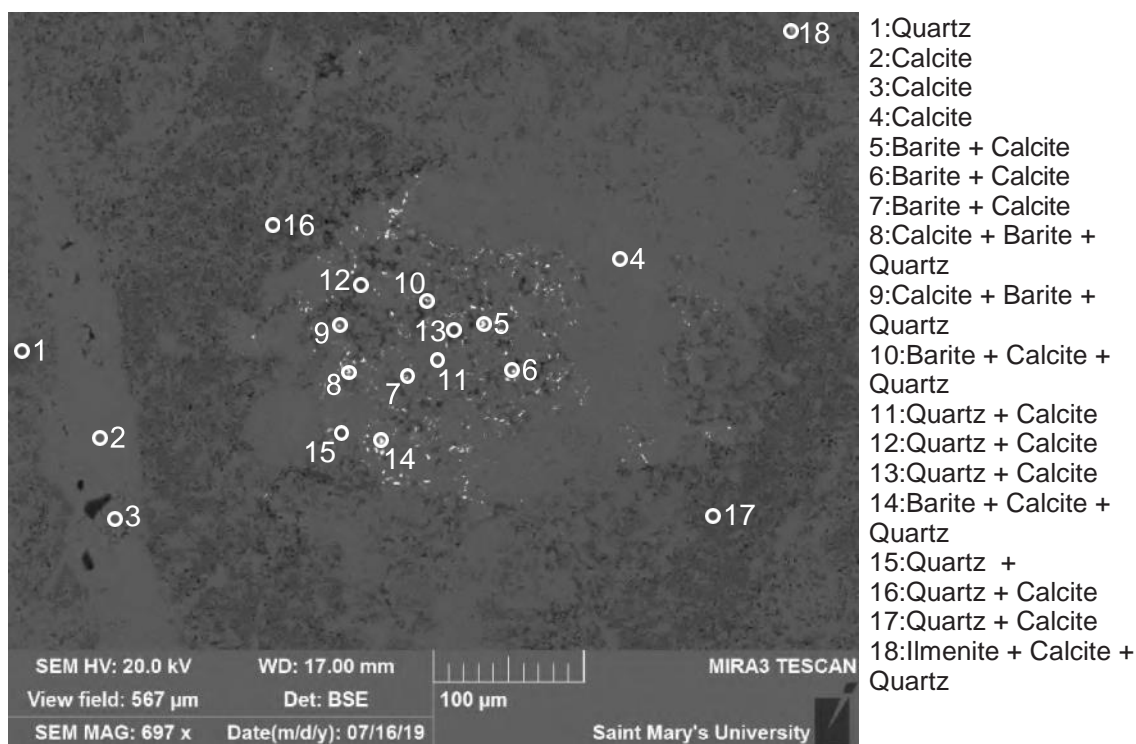

Figure S13.12: SK4a (SEM) Site 11 (Table S13.1).

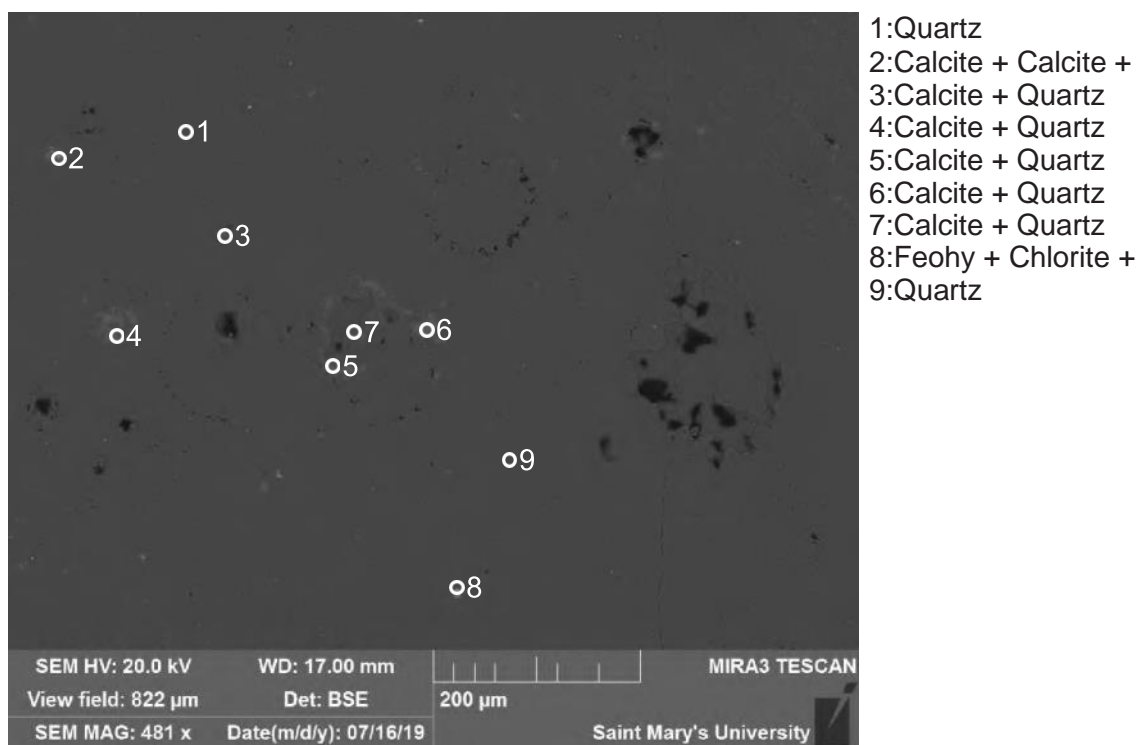

Figure S13.13: SK4a (SEM) Site 12 (Table S13.1).

Table S13.1: Scanning Electron Microscope (SEM) mineral chemical analyses (EDS) of SK4a.

| Site | Position | Mineral          | SiO2   | TiO2 | Al2O3 | FeO   | MnO  | MgO  | CaO   | Na2O | K2O  | P2O5 | SO3 | F | Cl   | CoO | ZnO | Ag2O | BaO | La2O3 | Ce2O3 | Nd2O3 | Total | Actual Total |
|------|----------|------------------|--------|------|-------|-------|------|------|-------|------|------|------|-----|---|------|-----|-----|------|-----|-------|-------|-------|-------|--------------|
| 1    | 1        | Qz               | 100.00 |      |       |       |      |      |       |      |      |      |     |   |      |     |     |      |     |       |       |       | 100   | 116          |
| 1    | 2        | Cal +            | 2.45   |      |       |       |      | 0.79 | 96.75 |      |      |      |     |   |      |     |     |      |     |       |       |       | 100   | 57           |
| 1    | 3        | Cal +            | 3.67   |      |       |       |      |      | 96.33 |      |      |      |     |   |      |     |     |      |     |       |       |       | 100   | 58           |
| 1    | 4        | Cal +            | 5.92   |      |       |       |      | 0.65 | 93.43 |      |      |      |     |   |      |     |     |      |     |       |       |       | 100   | 59           |
| 1    | 5        | Cal              | 0.90   |      |       |       |      |      | 55.10 |      |      |      |     |   |      |     |     |      |     |       |       |       | 56    | 57           |
| 1    | 6        | Cal +            | 5.10   |      |       |       |      | 0.68 | 94.22 |      |      |      |     |   |      |     |     |      |     |       |       |       | 100   | 60           |
| 1    | 7        | Feohy + Qz +     | 53.35  |      | 2.96  | 39.27 |      | 0.74 | 3.14  |      |      |      |     |   | 0.55 |     |     |      |     |       |       |       | 100   | 49           |
| 1    | 8        | Feohy + Qz +     | 61.15  |      | 3.29  | 29.29 |      | 1.28 | 2.57  | 1.21 | 0.42 |      |     |   | 0.79 |     |     |      |     |       |       |       | 100   | 71           |
| 1    | 9        | Feohy +          | 6.25   |      |       | 91.32 |      | 2.43 |       |      |      |      |     |   |      |     |     |      |     |       |       |       | 100   | 84           |
| 1    | 10       | Cal +            | 4.03   |      |       |       |      | 1.05 | 94.92 |      |      |      |     |   |      |     |     |      |     |       |       |       | 100   | 60           |
| 1    | 11       | Feohy +          | 12.05  |      | 1.37  | 84.73 |      | 1.85 |       |      |      |      |     |   |      |     |     |      |     |       |       |       | 100   | 88           |
| 1    | 12       | Qz               | 99.49  |      | 0.51  |       |      |      |       |      |      |      |     |   |      |     |     |      |     |       |       |       | 100   | 117          |
| 2    | 1        | Qz               | 100.00 |      |       |       |      |      |       |      |      |      |     |   |      |     |     |      |     |       |       |       | 100   | 116          |
| 2    | 2        | Cal +            | 2.03   |      |       |       |      | 0.88 | 97.09 |      |      |      |     |   |      |     |     |      |     |       |       |       | 100   | 57           |
| 2    | 3        | Feohy +          | 14.38  |      | 0.62  | 82.58 |      | 1.91 | 0.51  |      |      |      |     |   |      |     |     |      |     |       |       |       | 100   | 82           |
| 2    | 4        | Qz               | 99.51  |      |       |       |      |      | 0.49  |      |      |      |     |   |      |     |     |      |     |       |       |       | 100   | 121          |
| 2    | 5        | Cal              |        |      |       |       |      | 0.66 | 55.34 |      |      |      |     |   |      |     |     |      |     |       |       |       | 56    | 57           |
| 2    | 6        | Feohy +          | 7.32   |      | 1.88  | 82.79 |      | 1.77 | 4.44  |      |      | 1.39 |     |   | 0.42 |     |     |      |     |       |       |       | 100   | 76           |
| 2    | 7        | Cal              | 0.90   |      |       |       |      |      | 55.10 |      |      |      |     |   |      |     |     |      |     |       |       |       | 56    | 58           |
| 2    | 8        | Cal +            | 2.78   |      |       |       |      |      | 97.22 |      |      |      |     |   |      |     |     |      |     |       |       |       | 100   | 59           |
| 2    | 9        | Qz               | 100.00 |      |       |       |      |      |       |      |      |      |     |   |      |     |     |      |     |       |       |       | 100   | 123          |
| 3    | 1        | Qz + Cal         | 69.50  |      |       |       |      |      | 30.50 |      |      |      |     |   |      |     |     |      |     |       |       |       | 100   | 87           |
| 3    | 2        | Qz +             | 96.85  |      |       |       |      |      | 3.15  |      |      |      |     |   |      |     |     |      |     |       |       |       | 100   | 113          |
| 3    | 3        | Cal +            | 2.60   |      |       |       |      |      | 97.40 |      |      |      |     |   |      |     |     |      |     |       |       |       | 100   | 57           |
| 3    | 4        | Feohy +          | 21.73  |      | 2.15  | 73.36 |      | 1.78 | 0.98  |      |      |      |     |   |      |     |     |      |     |       |       |       | 100   | 79           |
| 3    | 5        | Feohy +          | 35.38  |      | 1.92  | 59.57 |      | 1.57 | 0.72  |      |      | 0.83 |     |   |      |     |     |      |     |       |       |       | 100   | 88           |
| 3    | 6        | Feohy + Qz       | 77.49  |      | 0.74  | 20.41 |      | 0.41 | 0.95  |      |      |      |     |   |      |     |     |      |     |       |       |       | 100   | 92           |
| 3    | 7        | Feohy + Qz       | 42.87  |      | 1.55  | 52.48 |      | 1.47 | 1.64  |      |      |      |     |   |      |     |     |      |     |       |       |       | 100   | 84           |
| 3    | 8        | Cal + Qz         | 3.53   |      |       |       |      |      | 96.47 |      |      |      |     |   |      |     |     |      |     |       |       |       | 100   | 58           |
| 3    | 9        | Cal + Qz         | 19.00  |      |       |       | 0.56 |      | 80.44 |      |      |      |     |   |      |     |     |      |     |       |       |       | 100   | 64           |
| 3    | 10       | Feohy + Qz +     | 26.11  |      | 2.23  | 67.79 |      | 1.72 | 1.26  |      |      | 0.88 |     |   |      |     |     |      |     |       |       |       | 100   | 89           |
| 3    | 11       | Feohy + Qz       | 53.87  |      |       | 44.81 |      | 0.89 | 0.43  |      |      |      |     |   |      |     |     |      |     |       |       |       | 100   | 111          |
| 3    | 12       | Feohy + Cal + Qz | 10.45  |      | 1.15  | 57.80 |      | 1.91 | 28.70 |      |      |      |     |   |      |     |     |      |     |       |       |       | 100   | 74           |
| 3    | 13       | Feohy + Qz + Cal | 8.56   |      |       | 86.90 |      | 1.70 | 2.84  |      |      |      |     |   |      |     |     |      |     |       |       |       | 100   | 83           |
| 3    | 14       | Cal + Qz         | 31.21  |      |       |       |      |      | 68.79 |      |      |      |     |   |      |     |     |      |     |       |       |       | 100   | 69           |
| 3    | 15       | Feohy + Qz +     | 60.73  |      | 1.04  | 34.94 |      | 1.00 | 1.58  |      |      | 0.70 |     |   |      |     |     |      |     |       |       |       | 100   | 98           |
| 3    | 16       | Feohy +          | 9.80   |      |       | 88.22 |      | 1.48 | 0.51  |      |      |      |     |   |      |     |     |      |     |       |       |       | 100   | 83           |
| 3    | 17       | Feohy + Qz       | 34.82  |      | 0.82  | 22.84 |      | 0.81 | 40.72 |      |      |      |     |   |      |     |     |      |     |       |       |       | 100   | 78           |
| 3    | 18       | Cal +            | 2.28   |      |       |       |      |      | 97.72 |      |      |      |     |   |      |     |     |      |     |       |       |       | 100   | 57           |
| 3    | 19       | Cal + Qz         | 40.96  |      |       |       |      | 0.49 | 58.55 |      |      |      |     |   |      |     |     |      |     |       |       |       | 100   | 74           |
| 3    | 20       | Qz +             | 96.84  |      | 0.50  |       |      |      | 2.66  |      |      |      |     |   |      |     |     |      |     |       |       |       | 100   | 114          |
| 3    | 21       | Qz               | 100.00 |      |       |       |      |      |       |      |      |      |     |   |      |     |     |      |     |       |       |       | 100   | 115          |
| 3    | 22       | Qz               | 100.00 |      |       |       |      |      |       |      |      |      |     |   |      |     |     |      |     |       |       |       | 100   | 120          |
| 4    | 1        | Cal + Qz         | 38.30  |      |       |       |      | 0.72 | 60.99 |      |      |      |     |   |      |     |     |      |     |       |       |       | 100   | 67           |
| 4    | 2        | Qz + Cal         | 93.78  |      |       |       |      |      | 6.22  |      |      |      |     |   |      |     |     |      |     |       |       |       | 100   | 104          |
| 4    | 3        | Cal + Qz         | 22.31  |      |       |       |      | 0.89 | 76.80 |      |      |      |     |   |      |     |     |      |     |       |       |       | 100   | 62           |
| 4    | 4        | Cal              | 0.96   |      |       |       |      | 0.57 | 54.47 |      |      |      |     |   |      |     |     |      |     |       |       |       | 56    | 55           |
| 4    | 5        | Cal + Qz         | 28.71  |      |       |       |      |      | 71.29 |      |      |      |     |   |      |     |     |      |     |       |       |       | 100   | 66           |
| 4    | 6        | Qz + Cal         | 85.66  |      |       |       |      |      | 14.34 |      |      |      |     |   |      |     |     |      |     |       |       |       | 100   | 99           |

Table S13.1: Scanning Electron Microscope (SEM) mineral chemical analyses (EDS) of SK4a.

| Site | Position | Mineral        | SiO2   | TiO2 | Al2O3 | FeO  | MnO | MgO  | CaO   | Na2O | K2O | P2O5 | SO3   | F | Cl | CoO   | ZnO  | Ag2O | BaO   | La2O3 | Ce2O3 | Nd2O3 | Total | Actual Total |
|------|----------|----------------|--------|------|-------|------|-----|------|-------|------|-----|------|-------|---|----|-------|------|------|-------|-------|-------|-------|-------|--------------|
| 4    | 7        | Cal + Qz       | 5.75   |      |       |      |     | 1.05 | 93.20 |      |     |      |       |   |    |       |      |      |       |       |       |       | 100   | 57           |
| 4    | 8        | Cal + Qz       | 70.87  |      |       |      |     |      | 29.13 |      |     |      |       |   |    |       |      |      |       |       |       |       | 100   | 90           |
| 4    | 9        | Cal            | 0.86   |      |       |      |     | 0.45 | 54.69 |      |     |      |       |   |    |       |      |      |       |       |       |       | 56    | 57           |
| 4    | 10       | Cal + Qz       | 43.43  |      |       |      |     |      | 56.57 |      |     |      |       |   |    |       |      |      |       |       |       |       | 100   | 73           |
| 4    | 11       | Cal            | 1.01   |      |       |      |     |      | 54.99 |      |     |      |       |   |    |       |      |      |       |       |       |       | 56    | 56           |
| 4    | 12       | Cal            | 1.04   |      |       |      |     | 0.44 | 54.52 |      |     |      |       |   |    |       |      |      |       |       |       |       | 56    | 55           |
| 4    | 13       | Cal            | 0.85   |      |       |      |     |      | 55.15 |      |     |      |       |   |    |       |      |      |       |       |       |       | 56    | 55           |
| 4    | 14       | Qz + Cal       | 97.86  |      |       |      |     |      | 2.14  |      |     |      |       |   |    |       |      |      |       |       |       |       | 100   | 113          |
| 4    | 15       | Qz             | 100.00 |      |       |      |     |      |       |      |     |      |       |   |    |       |      |      |       |       |       |       | 100   | 118          |
| 5    | 1        | Qz             | 100.00 |      |       |      |     |      |       |      |     |      |       |   |    |       |      |      |       |       |       |       | 100   | 100          |
| 5    | 2        | Qz             | 100.00 |      |       |      |     |      |       |      |     |      |       |   |    |       |      |      |       |       |       |       | 100   | 110          |
| 5    | 3        | Qz             | 100.00 |      |       |      |     |      |       |      |     |      |       |   |    |       |      |      |       |       |       |       | 100   | 94           |
| 5    | 4        | Qz +           | 93.72  |      | 1.46  | 1.22 |     | 0.78 | 1.35  | 0.34 |     |      | 1.13  |   |    |       |      |      |       |       |       |       | 100   | 93           |
| 5    | 5        | Brt + Cal + Qz | 2.66   |      |       |      |     |      | 18.45 |      |     |      | 28.79 |   |    | -0.11 |      |      | 50.20 |       |       |       | 100   | 95           |
| 5    | 6        | Brt + Cal + Qz | 6.65   |      |       |      |     |      | 22.17 |      |     |      | 25.48 |   |    | 0.10  |      |      | 45.60 |       |       |       | 100   | 92           |
| 5    | 7        | Cal + Qz       | 9.92   |      | 0.78  | 1.11 |     | 2.19 | 85.25 | 0.75 |     |      |       |   |    |       |      |      |       |       |       |       | 100   | 58           |
| 5    | 8        | Brt + Cal + Qz | 3.08   |      |       |      |     |      | 8.97  |      |     |      | 32.36 |   |    | -0.04 |      |      | 55.63 |       |       |       | 100   | 106          |
| 5    | 9        | Cal + Qz       | 2.77   |      |       |      |     |      | 97.23 |      |     |      |       |   |    |       |      |      |       |       |       |       | 100   | 56           |
| 5    | 10       | Brt + Cal + Qz | 5.06   |      |       |      |     |      | 5.12  |      |     |      | 32.64 |   |    | 0.13  |      |      | 57.04 |       |       |       | 100   | 112          |
| 5    | 11       | Brt + Cal + Qz | 6.70   |      |       |      |     |      | 18.53 |      |     |      | 27.35 |   |    | 0.09  |      |      | 47.34 |       |       |       | 100   | 98           |
| 5    | 12       | Cal            | 0.88   |      |       |      |     |      | 55.12 |      |     |      |       |   |    |       |      |      |       |       |       |       | 56    | 57           |
| 5    | 13       | Cal + Qz       | 4.05   |      |       |      |     |      | 95.95 |      |     |      |       |   |    |       |      |      |       |       |       |       | 100   | 58           |
| 5    | 14       | Brt + Cal + Qz | 8.87   |      |       |      |     |      | 12.24 |      |     |      | 28.06 |   |    | 0.05  |      |      | 50.78 |       |       |       | 100   | 106          |
| 5    | 15       | Brt + Cal + Qz | 2.51   |      |       |      |     |      | 10.35 |      |     |      | 30.52 |   |    | -0.04 |      |      | 56.65 |       |       |       | 100   | 102          |
| 5    | 16       | Brt + Cal + Qz | 4.07   |      |       |      |     |      | 7.98  |      |     |      | 32.51 |   |    | -0.06 |      |      | 55.49 |       |       |       | 100   | 106          |
| 5    | 17       | Brt + Cal + Qz | 10.16  |      |       |      |     |      | 50.94 |      |     |      | 12.12 |   |    |       |      |      | 26.78 |       |       |       | 100   | 75           |
| 5    | 18       | Brt + Cal + Qz | 2.50   |      |       |      |     |      | 24.16 |      |     |      | 26.97 |   |    | -0.18 |      |      | 46.56 |       |       |       | 100   | 94           |
| 5    | 19       | Cal + Qz       | 18.46  |      |       |      |     |      | 81.54 |      |     |      |       |   |    |       |      |      |       |       |       |       | 100   | 63           |
| 5    | 20       | Brt + Cal + Qz | 6.38   |      |       |      |     |      | 42.35 |      |     |      | 17.29 |   |    | 0.11  |      |      | 33.88 |       |       |       | 100   | 76           |
| 5    | 21       | Brt + Cal + Qz | 2.18   |      |       |      |     |      | 2.21  |      |     |      | 36.58 |   |    | -0.08 |      |      | 59.11 |       |       |       | 100   | 116          |
| 5    | 22       | Brt + Cal + Qz | 4.82   |      | 0.89  |      |     | 0.47 | 5.19  |      |     |      | 31.04 |   |    | -0.10 | 0.06 |      | 57.63 |       |       |       | 100   | 106          |
| 5    | 23       | Cal            | 0.93   |      |       |      |     |      | 55.07 |      |     |      |       |   |    |       |      |      |       |       |       |       | 56    | 57           |
| 5    | 24       | Cal + Qz       | 49.73  |      |       |      |     |      | 50.27 |      |     |      |       |   |    |       |      |      |       |       |       |       | 100   | 79           |
| 5    | 25       | Brt + Cal + Qz | 6.55   |      |       |      |     |      | 11.06 |      |     |      | 29.49 |   |    |       |      |      | 52.90 |       |       |       | 100   | 106          |
| 5    | 26       | Cal +          | 4.07   |      |       |      |     | 0.67 | 95.26 |      |     |      |       |   |    |       |      |      |       |       |       |       | 100   | 57           |
| 5    | 27       | Brt + Cal + Qz | 3.89   |      |       |      |     |      | 13.40 |      |     |      | 30.16 |   |    | -0.03 |      |      | 52.58 |       |       |       | 100   | 98           |
| 5    | 28       | Brt + Cal + Qz | 1.98   |      |       |      |     |      | 26.51 |      |     |      | 25.49 |   |    | -0.01 |      |      | 46.04 |       |       |       | 100   | 85           |
| 5    | 29       | Brt + Cal + Qz | 2.60   |      |       |      |     | 0.57 | 15.66 |      |     |      | 28.49 |   |    | -0.08 |      |      | 52.77 |       |       |       | 100   | 99           |
| 5    | 30       | Brt + Cal + Qz | 1.91   |      |       |      |     |      | 5.95  |      |     |      | 34.14 |   |    | -0.01 |      |      | 58.01 |       |       |       | 100   | 106          |
| 5    | 31       | Cal + Brt + Qz | 11.40  |      | 0.88  |      |     | 0.63 | 59.86 | 0.58 |     |      | 9.86  |   |    |       |      |      | 16.79 |       |       |       | 100   | 65           |
| 5    | 32       | Qz + Brt       | 78.22  |      |       |      |     |      | 15.23 |      |     |      | 2.75  |   |    |       |      |      | 3.81  |       |       |       | 100   | 99           |
| 5    | 33       | Qz             | 100.00 |      |       |      |     |      |       |      |     |      |       |   |    |       |      |      |       |       |       |       | 100   | 115          |
| 5    | 34       | Qz             | 100.00 |      |       |      |     |      |       |      |     |      |       |   |    |       |      |      |       |       |       |       | 100   | 117          |
| 5    | 35       | Cal + Qz       | 25.96  |      |       | 0.53 |     |      | 73.51 |      |     |      |       |   |    |       |      |      |       |       |       |       | 100   | 67           |
| 5    | 36       | Cal + Qz       | 12.66  |      |       | 0.89 |     | 1.08 | 85.37 |      |     |      |       |   |    |       |      |      |       |       |       |       | 100   | 61           |
| 5    | 37       | Cal            | 0.91   |      |       |      |     | 0.41 | 54.67 |      |     |      |       |   |    |       |      |      |       |       |       |       | 56    | 55           |
| 5    | 38       | Cal + Qz       | 4.59   |      |       |      |     |      | 95.41 |      |     |      |       |   |    |       |      |      |       |       |       |       | 100   | 56           |
| 5    | 39       | Cal + Qz       | 21.35  |      |       |      |     | 0.65 | 78.00 |      |     |      |       |   |    |       |      |      |       |       |       |       | 100   | 67           |
| 5    | 40       | Cal            |        |      |       |      |     | 0.39 | 55.61 |      |     |      |       |   |    |       |      |      |       |       |       |       | 56    | 58           |



Table S13.1: Scanning Electron Microscope (SEM) mineral chemical analyses (EDS) of SK4a.

| Site | Position | Mineral               | SiO2   | TiO2 | Al2O3 | FeO   | MnO | MgO  | CaO   | Na2O | K2O  | P2O5 | SO3 | F | Cl | CoO | ZnO | Ag2O | BaO | La2O3 | Ce2O3 | Nd2O3 | Total | Actual Total |
|------|----------|-----------------------|--------|------|-------|-------|-----|------|-------|------|------|------|-----|---|----|-----|-----|------|-----|-------|-------|-------|-------|--------------|
| 6    | 1        | Cal                   |        |      |       |       |     | 0.53 | 55.47 |      |      |      |     |   |    |     |     |      |     |       |       |       | 56    | 52           |
| 6    | 2        | Cal + Qz              | 15.32  |      |       |       |     | 0.77 | 83.91 |      |      |      |     |   |    |     |     |      |     |       |       |       | 100   | 59           |
| 6    | 3        | Cal + Qz              | 15.55  |      |       |       |     |      | 84.45 |      |      |      |     |   |    |     |     |      |     |       |       |       | 100   | 61           |
| 6    | 4        | Cal + Qz              | 6.70   |      |       |       |     |      | 93.30 |      |      |      |     |   |    |     |     |      |     |       |       |       | 100   | 58           |
| 6    | 5        | Cal                   | 1.09   |      |       |       |     |      | 54.91 |      |      |      |     |   |    |     |     |      |     |       |       |       | 56    | 57           |
| 6    | 6        | Qz                    | 100.00 |      |       |       |     |      |       |      |      |      |     |   |    |     |     |      |     |       |       |       | 100   | 119          |
| 6    | 7        | Feohy + Qz +          | 51.00  |      | 1.55  | 43.79 |     |      | 2.49  |      |      | 1.17 |     |   |    |     |     |      |     |       |       |       | 100   | 106          |
| 6    | 8        | Feohy + Qz +          | 23.72  |      | 2.88  | 69.61 |     | 1.02 | 0.81  |      |      | 1.95 |     |   |    |     |     |      |     |       |       |       | 100   | 81           |
| 6    | 9        | Feohy + Qz +          | 20.24  |      | 2.43  | 75.05 |     |      | 0.57  |      |      | 1.71 |     |   |    |     |     |      |     |       |       |       | 100   | 87           |
| 7    | 1        | Qz                    | 100.00 |      |       |       |     |      |       |      |      |      |     |   |    |     |     |      |     |       |       |       | 100   | 116          |
| 7    | 2        | Cal +                 | 2.07   |      |       |       |     |      | 97.93 |      |      |      |     |   |    |     |     |      |     |       |       |       | 100   | 55           |
| 7    | 3        | Cal +                 | 2.39   |      |       |       |     |      | 97.61 |      |      |      |     |   |    |     |     |      |     |       |       |       | 100   | 56           |
| 7    | 4        | Qz +                  | 85.10  |      | 0.69  | 13.64 |     | 0.31 | 0.25  |      |      |      |     |   |    |     |     |      |     |       |       |       | 100   | 107          |
| 7    | 5        | Feohy + Cal + Qz      | 22.02  |      |       | 19.25 |     |      | 58.73 |      |      |      |     |   |    |     |     |      |     |       |       |       | 100   | 68           |
| 7    | 6        | Cal + Qz              | 23.05  |      |       |       |     |      | 76.95 |      |      |      |     |   |    |     |     |      |     |       |       |       | 100   | 64           |
| 7    | 7        | Cal +                 | 22.77  |      | 0.58  | 14.33 |     | 0.73 | 61.59 |      |      |      |     |   |    |     |     |      |     |       |       |       | 100   | 69           |
| 7    | 8        | Cal +                 | 35.03  |      | 0.61  | 8.87  |     | 0.65 | 54.84 |      |      |      |     |   |    |     |     |      |     |       |       |       | 100   | 76           |
| 7    | 9        | Cal + Qz              | 22.70  |      |       | 0.56  |     | 0.53 | 76.21 |      |      |      |     |   |    |     |     |      |     |       |       |       | 100   | 66           |
| 7    | 10       | Cal +                 | 2.21   |      |       |       |     |      | 97.79 |      |      |      |     |   |    |     |     |      |     |       |       |       | 100   | 57           |
| 7    | 11       | Cal +                 | 33.84  |      |       | 17.00 |     | 0.85 | 48.31 |      |      |      |     |   |    |     |     |      |     |       |       |       | 100   | 74           |
| 7    | 12       | Cal + Qz              | 2.42   |      |       | 0.71  |     | 1.15 | 95.73 |      |      |      |     |   |    |     |     |      |     |       |       |       | 100   | 57           |
| 7    | 13       | Cal +                 | 6.91   |      | 0.93  | 27.64 |     | 0.95 | 63.58 |      |      |      |     |   |    |     |     |      |     |       |       |       | 100   | 61           |
| 7    | 14       | Cal + Qz + Feohy + Ap | 8.67   |      |       | 18.58 |     | 0.98 | 70.85 |      |      | 0.91 |     |   |    |     |     |      |     |       |       |       | 100   | 62           |
| 7    | 15       | Cal                   | 0.94   |      |       |       |     | 0.39 | 54.67 |      |      |      |     |   |    |     |     |      |     |       |       |       | 56    | 57           |
| 7    | 16       | Qz + Feohy + Cal      | 57.71  |      | 0.87  | 27.07 |     | 0.68 | 13.67 |      |      |      |     |   |    |     |     |      |     |       |       |       | 100   | 100          |
| 7    | 17       | Qz + Feohy + Cal      | 50.81  |      | 1.30  | 36.77 |     | 1.15 | 9.97  |      |      |      |     |   |    |     |     |      |     |       |       |       | 100   | 94           |
| 7    | 18       | Cal +                 | 5.82   |      |       |       |     | 1.02 | 93.16 |      |      |      |     |   |    |     |     |      |     |       |       |       | 100   | 60           |
| 7    | 19       | Qz                    | 100.00 |      |       |       |     |      |       |      |      |      |     |   |    |     |     |      |     |       |       |       | 100   | 119          |
| 7    | 20       | Qz                    | 99.31  |      |       |       |     |      | 0.69  |      |      |      |     |   |    |     |     |      |     |       |       |       | 100   | 117          |
| 8    | 1        | Cal + Qz              | 18.17  |      |       |       |     |      | 81.83 |      |      |      |     |   |    |     |     |      |     |       |       |       | 100   | 59           |
| 8    | 2        | Cal                   | 0.98   |      |       |       |     |      | 55.02 |      |      |      |     |   |    |     |     |      |     |       |       |       | 56    | 55           |
| 8    | 3        | Qz + Cal              | 78.82  |      |       |       |     |      | 21.18 |      |      |      |     |   |    |     |     |      |     |       |       |       | 100   | 96           |
| 8    | 4        | Cal + Qz              | 5.90   |      |       |       |     | 0.74 | 93.36 |      |      |      |     |   |    |     |     |      |     |       |       |       | 100   | 58           |
| 8    | 5        | Qz                    | 98.81  |      | 0.96  |       |     |      |       |      | 0.23 |      |     |   |    |     |     |      |     |       |       |       | 100   | 115          |
| 8    | 6        | Qz                    | 98.85  |      | 0.92  |       |     |      |       |      | 0.23 |      |     |   |    |     |     |      |     |       |       |       | 100   | 109          |
| 8    | 7        | Qz                    | 98.55  |      | 0.66  | 0.79  |     |      |       |      |      |      |     |   |    |     |     |      |     |       |       |       | 100   | 104          |
| 8    | 8        | Cal + Qz              | 30.59  |      |       |       |     | 0.92 | 68.49 |      |      |      |     |   |    |     |     |      |     |       |       |       | 100   | 69           |
| 8    | 9        | Cal +                 | 2.44   |      |       |       |     |      | 97.56 |      |      |      |     |   |    |     |     |      |     |       |       |       | 100   | 58           |
| 8    | 10       | Qz                    | 100.00 |      |       |       |     |      |       |      |      |      |     |   |    |     |     |      |     |       |       |       | 100   | 117          |
| 9    | 1        | Cal                   | 0.98   |      |       |       |     | 0.48 | 54.54 |      |      |      |     |   |    |     |     |      |     |       |       |       | 56    | 50           |
| 9    | 2        | Cal + Qz              | 23.08  |      |       |       |     |      | 76.92 |      |      |      |     |   |    |     |     |      |     |       |       |       | 100   | 59           |
| 9    | 3        | Cal + Qz              | 17.49  |      |       |       |     |      | 82.51 |      |      |      |     |   |    |     |     |      |     |       |       |       | 100   | 59           |
| 9    | 4        | Cal + Qz              | 2.97   |      |       |       |     |      | 97.03 |      |      |      |     |   |    |     |     |      |     |       |       |       | 100   | 55           |
| 9    | 5        | Cal + Qz              | 23.33  |      |       |       |     |      | 76.67 |      |      |      |     |   |    |     |     |      |     |       |       |       | 100   | 64           |
| 9    | 6        | Cal +                 | 3.05   |      |       |       |     | 1.17 | 95.78 |      |      |      |     |   |    |     |     |      |     |       |       |       | 100   | 55           |
| 9    | 7        | Qz                    | 99.38  |      |       |       |     |      | 0.62  |      |      |      |     |   |    |     |     |      |     |       |       |       | 100   | 112          |
| 9    | 8        | Cal + Qz              | 57.40  |      |       |       |     |      | 42.60 |      |      |      |     |   |    |     |     |      |     |       |       |       | 100   | 78           |
| 9    | 9        | Cal + Qz              | 32.42  |      |       |       |     |      | 67.58 |      |      |      |     |   |    |     |     |      |     |       |       |       | 100   | 64           |
| 9    | 10       | Qz                    | 100.00 |      |       |       |     |      |       |      |      |      |     |   |    |     |     |      |     |       |       |       | 100   | 110          |

Table S13.1: Scanning Electron Microscope (SEM) mineral chemical analyses (EDS) of SK4a.

| Site | Position | Mineral        | SiO2   | TiO2  | Al2O3 | FeO   | MnO  | MgO  | CaO   | Na2O | K2O  | P2O5  | SO3   | F     | Cl   | CoO   | ZnO  | Ag2O | BaO   | La2O3 | Ce2O3 | Nd2O3 | Total | Actual Total |
|------|----------|----------------|--------|-------|-------|-------|------|------|-------|------|------|-------|-------|-------|------|-------|------|------|-------|-------|-------|-------|-------|--------------|
| 9    | 11       | Br + Cal + Qz  | 3.17   |       |       |       |      |      | 31.71 |      |      |       | 22.11 |       |      | -0.17 |      |      | 43.19 |       |       |       | 100   | 82           |
| 9    | 12       | Qz + Cal       | 90.74  |       |       |       |      |      | 9.26  |      |      |       |       |       |      |       |      |      |       |       |       |       | 100   | 96           |
| 10   | 1        | Qz             | 100.00 |       |       |       |      |      |       |      |      |       |       |       |      |       |      |      |       |       |       |       | 100   | 112          |
| 10   | 2        | Cal            | 0.90   |       |       |       |      |      | 55.10 |      |      |       |       |       |      |       |      |      |       |       |       |       | 56    | 55           |
| 10   | 3        | Ap             | 1.09   |       |       |       |      |      | 51.14 | 1.13 |      | 39.28 | 1.59  | 5.78  |      |       |      |      |       |       |       |       | 100   | 102          |
| 10   | 4        | Cal + Qz       | 19.45  |       |       |       |      | 0.59 | 79.96 |      |      |       |       |       |      |       |      |      |       |       |       |       | 100   | 64           |
| 10   | 5        | Cal            | 0.92   |       |       |       |      | 0.57 | 54.50 |      |      |       |       |       |      |       |      |      |       |       |       |       | 56    | 57           |
| 10   | 6        | Cal +          | 6.05   |       |       |       |      |      | 93.95 |      |      |       |       |       |      |       |      |      |       |       |       |       | 100   | 61           |
| 10   | 7        | Qz             | 99.54  |       |       |       |      |      | 0.46  |      |      |       |       |       |      |       |      |      |       |       |       |       | 100   | 113          |
| 10   | 8        | Mnz (Ce) + Qz  | 40.03  |       |       |       |      |      | 2.33  |      |      | 20.29 |       | -0.20 |      |       | 1.51 |      | 9.86  | 19.34 | 6.84  |       | 100   | 118          |
| 10   | 9        | Cal + Qz       | 9.60   |       |       |       |      | 0.66 | 89.74 |      |      |       |       |       |      |       |      |      |       |       |       |       | 100   | 61           |
| 10   | 10       | Qz             | 99.07  |       |       |       |      |      | 0.93  |      |      |       |       |       |      |       |      |      |       |       |       |       | 100   | 112          |
| 11   | 1        | Qz             | 98.96  |       | 0.57  |       |      |      | 0.47  |      |      |       |       |       |      |       |      |      |       |       |       |       | 100   | 116          |
| 11   | 2        | Cal            |        |       |       |       |      | 0.85 | 55.15 |      |      |       |       |       |      |       |      |      |       |       |       |       | 56    | 57           |
| 11   | 3        | Cal            | 1.16   |       |       |       |      | 0.77 | 54.04 |      |      |       |       |       |      |       | 0.02 |      |       |       |       |       | 56    | 57           |
| 11   | 4        | Cal            |        |       |       |       |      |      | 56.00 |      |      |       |       |       |      |       |      |      |       |       |       |       | 56    | 59           |
| 11   | 5        | Br + Cal       | 1.30   |       |       |       |      | 0.64 | 19.79 |      |      |       | 27.64 |       |      | 0.01  |      |      | 50.62 |       |       |       | 100   | 98           |
| 11   | 6        | Br + Cal       | 1.15   |       |       |       |      |      | 10.17 |      |      |       | 33.36 |       |      | 0.05  |      |      | 55.26 |       |       |       | 100   | 113          |
| 11   | 7        | Br + Cal       | 14.43  |       |       |       |      |      | 31.02 |      |      |       | 18.90 |       |      | -0.04 |      |      | 35.69 |       |       |       | 100   | 94           |
| 11   | 8        | Cal + Br + Qz  | 3.41   |       |       |       |      |      | 75.82 |      |      |       | 6.70  |       |      |       |      |      | 14.07 |       |       |       | 100   | 65           |
| 11   | 9        | Cal + Br + Qz  | 2.52   |       |       |       |      |      | 84.83 |      |      |       | 3.83  |       |      |       |      |      | 8.82  |       |       |       | 100   | 63           |
| 11   | 10       | Br + Cal + Qz  | 6.06   |       |       |       |      |      | 36.45 |      |      |       | 20.46 |       |      | -0.12 |      |      | 37.14 |       |       |       | 100   | 84           |
| 11   | 11       | Qz + Cal       | 51.93  |       |       |       |      |      | 48.07 |      |      |       |       |       |      |       |      |      |       |       |       |       | 100   | 82           |
| 11   | 12       | Qz + Cal       | 96.23  |       | 0.90  |       |      |      | 2.66  |      | 0.22 |       |       |       |      |       |      |      |       |       |       |       | 100   | 107          |
| 11   | 13       | Qz + Cal       | 92.78  |       | 0.60  | 0.44  |      |      | 6.18  |      |      |       |       |       |      |       |      |      |       |       |       |       | 100   | 103          |
| 11   | 14       | Br + Cal + Qz  | 1.44   |       |       |       |      |      | 6.78  |      |      |       | 33.99 |       |      | -0.04 |      |      | 57.84 |       |       |       | 100   | 116          |
| 11   | 15       | Qz +           | 88.09  |       | 0.88  | 0.36  |      |      | 10.07 | 0.31 | 0.29 |       |       |       |      |       |      |      |       |       |       |       | 100   | 109          |
| 11   | 16       | Qz + Cal       | 79.76  |       |       |       |      |      | 20.24 |      |      |       |       |       |      |       |      |      |       |       |       |       | 100   | 101          |
| 11   | 17       | Qz + Cal       | 93.95  |       |       |       |      |      | 6.05  |      |      |       |       |       |      |       |      |      |       |       |       |       | 100   | 108          |
| 11   | 18       | Ilm + Cal + Qz | 3.37   | 57.65 |       | 35.09 | 0.58 | 0.82 | 2.49  |      |      |       |       |       |      |       |      |      |       |       |       |       | 100   | 101          |
| 12   | 1        | Qz             | 99.81  |       |       |       |      |      |       |      | 0.19 |       |       |       |      |       |      |      |       |       |       |       | 100   | 116          |
| 12   | 2        | Cal + Cal +    | 59.32  | 0.58  | 2.10  | 9.48  |      | 0.68 | 27.21 |      | 0.64 |       |       |       |      |       |      |      |       |       |       |       | 100   | 86           |
| 12   | 3        | Cal + Qz       | 14.29  |       |       |       |      |      | 85.71 |      |      |       |       |       |      |       |      |      |       |       |       |       | 100   | 63           |
| 12   | 4        | Cal + Qz       | 7.51   |       |       |       |      | 0.79 | 91.71 |      |      |       |       |       |      |       |      |      |       |       |       |       | 100   | 58           |
| 12   | 5        | Cal + Qz       | 10.00  |       |       |       |      | 0.97 | 87.74 |      |      |       | 1.30  |       |      |       |      |      |       |       |       |       | 100   | 63           |
| 12   | 6        | Cal + Qz       | 1.64   |       |       |       |      | 1.39 | 96.97 |      |      |       |       |       |      |       |      |      |       |       |       |       | 100   | 60           |
| 12   | 7        | Cal + Qz       | 40.16  |       |       |       |      | 0.85 | 58.99 |      |      |       |       |       |      |       |      |      |       |       |       |       | 100   | 78           |
| 12   | 8        | Feohy + Chl +  | 17.45  |       | 5.14  | 73.41 |      | 2.07 | 0.82  |      | 0.74 |       |       |       | 0.37 |       |      |      |       |       |       |       | 100   | 82           |
| 12   | 9        | Qz             | 99.66  |       |       |       |      |      | 0.34  |      |      |       |       |       |      |       |      |      |       |       |       |       | 100   | 122          |
